# Supplementary material for: Selective ubiquitination of drug-like small molecules by the ubiquitin ligase HUWE1
Source: Springer Nature journal article supplement (doi:10.1038/s41467-025-63442-x), 2025-09-02
Supplement: MOESM2 [file 41467_2025_63442_MOESM2_ESM.pdf › 41467_2025_63442_MOESM2_ESM.pdf]

## **Description of Additional Supplementary Files**

### **File Name: Supplementary Data 1**

**Description:** HDX-MS data for the HUWE1<sup>HECT</sup>~Ub proxy and HUWE1<sup>HECT</sup> in the presence of BI8626, BI8622, and DMSO (as a control), respectively.

### **File Name: Supplementary Data 2**

**Description:** global quantitative and diGly proteomic data from HEK293 cells upon BI8626 treatment (15  $\mu$ M; 24h) compared to a DMSO control.
