# Supplementary material for: Selective ubiquitination of drug-like small molecules by the ubiquitin ligase HUWE1
Source: Nat Commun. 2025 Sep 2;16:8182. doi: 10.1038/s41467-025-63442-x (PMC12405493; doi:10.1038/s41467-025-63442-x)
Supplement: Supplementary file 3 — Supplementary Data 1 [file 41467_2025_63442_MOESM3_ESM.xlsx]

## Sheet: Overview
Overview of data obtained by hydrogen-deuterium exchange mass spectrometry (HDX-MS)
	Experiment 1	Experiment 2
Protein	HUWE1-HECT	HUWE1-HECT-Ub vinylthioether-linked conjugate
Conditions of HDX	25 °C in 20 mM HEPES-Na pH 8.0, 150 mM NaCl, 5 mM DTT; final D2O = 87.75% (v/v)
Time course of HDX	10/30/100/1000 s	10/30/100/1000/10000 s
Samples	1) Apo: 200 µL 52.5 µM HUWE1-HECT protein (without or with ubiquitin conjugated at cysteine 4341 + 10.6 µL DMSO 2) BI8626: 200 µL 52.5 µM HUWE1-HECT protein (without or with ubiquitin conjugated at cysteine 4341) + 10.6 µL 10 mM BI8626 3) BI8622: 200 µL 52.5 µM HUWE1-HECT protein (without or with ubiquitin conjugated at cysteine 4341) + 10.6 µL 10 mM BI8622
Replicates	3 technical replicates (separate HDX reactions) each
Number of Peptides	171	273
Average peptide length (aa)	7.99	9.98
Sequence coverage (%)	94.3	97.9
Redundancy	3.77	7.25
Back-exchange	No correction for back-exchange based on a fully deuterated sample conducted
Repeatability (average SD)	0.046 Da / 1.15%	0.028 Da / 0.35%
Significance criterium applied	5% difference in relative HDX

## Sheet: Exp1_HDX_Peptides
Sample	Start	End	Peptide sequence	Maximal uptake (#)	Peptide mass (Da)	Retention time (min)	Retention time SD (min)	HDX time (s)	Uptake (Da)	Uptake SD (Da)	Uptake (%)	Uptake SD (%)
BI8622	3991	4005	GPDFDVKRKYFRQEL	13	1896.98	4.72647	0.050412	0	0	0	0	0
BI8622	3991	4005	GPDFDVKRKYFRQEL	13	1896.98	5.01067	0.16349	10	1.27659	0.093747	9.81989	0.721131
BI8622	3991	4005	GPDFDVKRKYFRQEL	13	1896.98	4.80443	0.02719	30	1.47436	0.102447	11.3412	0.788054
BI8622	3991	4005	GPDFDVKRKYFRQEL	13	1896.98	4.71253	0.001721	100	2.15253	0.026631	16.5579	0.204854
BI8622	3991	4005	GPDFDVKRKYFRQEL	13	1896.98	4.72997	0.009088	1000	3.63568	0.071379	27.9668	0.549069
BI8626	3991	4005	GPDFDVKRKYFRQEL	13	1896.98	4.71289	0.038292	0	0	0	0	0
BI8626	3991	4005	GPDFDVKRKYFRQEL	13	1896.98	4.85284	0.027044	10	1.46296	0.087249	11.2535	0.671146
BI8626	3991	4005	GPDFDVKRKYFRQEL	13	1896.98	4.82415	0.008266	30	1.67029	0.146998	12.8484	1.13075
BI8626	3991	4005	GPDFDVKRKYFRQEL	13	1896.98	4.74081	0	100	2.21834	0.019099	17.0642	0.146915
BI8626	3991	4005	GPDFDVKRKYFRQEL	13	1896.98	4.76099	0	1000	3.70641	0.019099	28.5108	0.146915
Apo	3991	4005	GPDFDVKRKYFRQEL	13	1896.98	4.67824	0.021486	0	0	0	0	0
Apo	3991	4005	GPDFDVKRKYFRQEL	13	1896.98	4.8165	0.084785	10	1.48634	0.084152	11.4334	0.647323
Apo	3991	4005	GPDFDVKRKYFRQEL	13	1896.98	4.86652	0.013405	30	1.71841	0.091377	13.2185	0.7029
Apo	3991	4005	GPDFDVKRKYFRQEL	13	1896.98	4.73777	0	100	2.08693	0.065042	16.0533	0.500323
Apo	3991	4005	GPDFDVKRKYFRQEL	13	1896.98	4.76712	0.004494	1000	3.73468	0.170892	28.7283	1.31455
BI8622	3994	3999	FDVKRK	5	791.465	3.78238	0.02889	0	0	0	0	0
BI8622	3994	3999	FDVKRK	5	791.465	4.06353	0.136033	10	0.484803	0.094259	9.69606	1.88518
BI8622	3994	3999	FDVKRK	5	791.465	3.83682	0.028182	30	0.734253	0.038944	14.6851	0.77888
BI8622	3994	3999	FDVKRK	5	791.465	3.7258	0.013181	100	1.0069	0.042017	20.1381	0.84034
BI8622	3994	3999	FDVKRK	5	791.465	3.77708	0.009761	1000	1.8918	0.049065	37.836	0.9813
BI8626	3994	3999	FDVKRK	5	791.465	3.80374	0.021275	0	0	0	0	0
BI8626	3994	3999	FDVKRK	5	791.465	3.97607	0.037825	10	0.443358	0.073749	8.86716	1.47498
BI8626	3994	3999	FDVKRK	5	791.465	3.90869	0.019895	30	0.69366	0.061563	13.8732	1.23126
BI8626	3994	3999	FDVKRK	5	791.465	3.78067	0	100	0.845919	0.061558	16.9184	1.23116
BI8626	3994	3999	FDVKRK	5	791.465	3.78213	0.019747	1000	1.84971	0.069099	36.9943	1.38198
Apo	3994	3999	FDVKRK	5	791.465	3.7477	0.008017	0	0	0	0	0
Apo	3994	3999	FDVKRK	5	791.465	3.85875	0.077914	10	0.419994	0.045901	8.39988	0.91802
Apo	3994	3999	FDVKRK	5	791.465	4.00548	0.05269	30	0.641255	0.049789	12.8251	0.99578
Apo	3994	3999	FDVKRK	5	791.465	3.7873	0	100	0.993449	0.037793	19.869	0.75586
Apo	3994	3999	FDVKRK	5	791.465	3.82303	0.041466	1000	1.87364	0.122804	37.4728	2.45608
BI8622	3995	4005	DVKRKYFRQEL	10	1480.81	4.41516	0.031816	0	0	0	0	0
BI8622	3995	4005	DVKRKYFRQEL	10	1480.81	4.68268	0.149511	10	0.194271	0.060835	1.94271	0.60835
BI8622	3995	4005	DVKRKYFRQEL	10	1480.81	4.4847	0.036617	30	0.132346	0.113097	1.32346	1.13097
BI8622	3995	4005	DVKRKYFRQEL	10	1480.81	4.37057	0.004025	100	0.599533	0.027545	5.99533	0.27545
BI8622	3995	4005	DVKRKYFRQEL	10	1480.81	4.40442	0.003378	1000	1.48222	0.060011	14.8222	0.60011
BI8626	3995	4005	DVKRKYFRQEL	10	1480.81	4.41738	0.019913	0	0	0	0	0
BI8626	3995	4005	DVKRKYFRQEL	10	1480.81	4.54948	0.036288	10	0.11347	0.085918	1.1347	0.85918
BI8626	3995	4005	DVKRKYFRQEL	10	1480.81	4.50852	0.013769	30	0.054616	0.148881	0.54616	1.48881
BI8626	3995	4005	DVKRKYFRQEL	10	1480.81	4.41226	0	100	0.418952	0.067941	4.18952	0.67941
BI8626	3995	4005	DVKRKYFRQEL	10	1480.81	4.449	0	1000	1.32063	0.067941	13.2063	0.67941
Apo	3995	4005	DVKRKYFRQEL	10	1480.81	4.39599	0.016886	0	0	0	0	0
Apo	3995	4005	DVKRKYFRQEL	10	1480.81	4.49475	0.088432	10	0.251043	0.157347	2.51043	1.57347
Apo	3995	4005	DVKRKYFRQEL	10	1480.81	4.55464	0.018333	30	0.228783	0.153381	2.28783	1.53381
Apo	3995	4005	DVKRKYFRQEL	10	1480.81	4.40539	0	100	0.622111	0.14223	6.22111	1.4223
Apo	3995	4005	DVKRKYFRQEL	10	1480.81	4.44782	0.012919	1000	1.51077	0.215917	15.1077	2.15917
BI8622	4000	4004	YFRQE	4	741.344	4.25722	0.028918	0	0	0	0	0
BI8622	4000	4004	YFRQE	4	741.344	4.49369	0.118508	10	0.061523	0.025489	1.53808	0.637225
BI8622	4000	4004	YFRQE	4	741.344	4.29542	0.046539	30	0.138616	0.004745	3.4654	0.118625
BI8622	4000	4004	YFRQE	4	741.344	4.20827	0.004651	100	0.129729	0.011531	3.24323	0.288275
BI8622	4000	4004	YFRQE	4	741.344	4.25165	0.008488	1000	0.379144	0.023486	9.4786	0.58715
BI8626	4000	4004	YFRQE	4	741.344	4.27581	0.014586	0	0	0	0	0
BI8626	4000	4004	YFRQE	4	741.344	4.42335	0.036239	10	0.121146	0.064151	3.02865	1.60377
BI8626	4000	4004	YFRQE	4	741.344	4.34631	0.018895	30	0.10991	0.065292	2.74775	1.6323
BI8626	4000	4004	YFRQE	4	741.344	4.26207	0	100	0.17801	0.064071	4.45025	1.60178
BI8626	4000	4004	YFRQE	4	741.344	4.25936	0.018516	1000	0.360133	0.064803	9.00333	1.62007
Apo	4000	4004	YFRQE	4	741.344	4.22619	0.021587	0	0	0	0	0
Apo	4000	4004	YFRQE	4	741.344	4.32449	0.083099	10	0.096233	0.040352	2.40583	1.0088
Apo	4000	4004	YFRQE	4	741.344	4.43146	0.031613	30	0.065718	0.041815	1.64295	1.04537
Apo	4000	4004	YFRQE	4	741.344	4.24122	0	100	0.073773	0.038665	1.84433	0.966625
Apo	4000	4004	YFRQE	4	741.344	4.27696	0.03285	1000	0.331301	0.043494	8.28252	1.08735
BI8622	4005	4008	LERL	3	529.322	4.56926	0.040555	0	0	0	0	0
BI8622	4005	4008	LERL	3	529.322	4.79106	0.125997	10	0.268642	0.05553	8.95473	1.851
BI8622	4005	4008	LERL	3	529.322	4.61814	0.047744	30	0.496011	0.030796	16.5337	1.02653
BI8622	4005	4008	LERL	3	529.322	4.54077	0.002678	100	0.770569	0.011364	25.6856	0.3788
BI8622	4005	4008	LERL	3	529.322	4.57148	0.004787	1000	1.33701	0.049759	44.5669	1.65863
BI8626	4005	4008	LERL	3	529.322	4.59496	0.032776	0	0	0	0	0
BI8626	4005	4008	LERL	3	529.322	4.73159	0.034912	10	0.252904	0.086449	8.43013	2.88163
BI8626	4005	4008	LERL	3	529.322	4.64965	0.017267	30	0.425185	0.069922	14.1728	2.33073
BI8626	4005	4008	LERL	3	529.322	4.58652	0	100	0.70355	0.063273	23.4517	2.1091
BI8626	4005	4008	LERL	3	529.322	4.5871	0.015068	1000	1.30561	0.090389	43.5202	3.01297
Apo	4005	4008	LERL	3	529.322	4.53805	0.030565	0	0	0	0	0
Apo	4005	4008	LERL	3	529.322	4.64186	0.081387	10	0.230058	0.054318	7.6686	1.8106
Apo	4005	4008	LERL	3	529.322	4.74365	0.024109	30	0.389546	0.064388	12.9849	2.14627
Apo	4005	4008	LERL	3	529.322	4.57287	0	100	0.788119	0.041098	26.2706	1.36993
Apo	4005	4008	LERL	3	529.322	4.59804	0.023839	1000	1.29042	0.070458	43.0141	2.3486
BI8622	4005	4009	LERLD	4	644.349	4.40699	0.029769	0	0	0	0	0
BI8622	4005	4009	LERLD	4	644.349	4.63109	0.121567	10	0.636703	0.029373	15.9176	0.734325
BI8622	4005	4009	LERLD	4	644.349	4.44781	0.042664	30	0.84936	0.013919	21.234	0.347975
BI8622	4005	4009	LERLD	4	644.349	4.36501	0.003524	100	1.20645	0.014016	30.1613	0.3504
BI8622	4005	4009	LERLD	4	644.349	4.40002	0.007192	1000	1.70009	0.028715	42.5022	0.717875
BI8626	4005	4009	LERLD	4	644.349	4.43018	0.023656	0	0	0	0	0
BI8626	4005	4009	LERLD	4	644.349	4.56405	0.038256	10	0.608694	0.032542	15.2173	0.81355
BI8626	4005	4009	LERLD	4	644.349	4.49305	0.01414	30	0.787283	0.031855	19.6821	0.796375
BI8626	4005	4009	LERLD	4	644.349	4.41456	0	100	1.08864	0.028861	27.2159	0.721525
BI8626	4005	4009	LERLD	4	644.349	4.4118	0.013745	1000	1.67824	0.047476	41.956	1.1869
Apo	4005	4009	LERLD	4	644.349	4.38115	0.019759	0	0	0	0	0
Apo	4005	4009	LERLD	4	644.349	4.47506	0.082424	10	0.585534	0.036091	14.6383	0.902275
Apo	4005	4009	LERLD	4	644.349	4.58009	0.032327	30	0.77181	0.036174	19.2952	0.90435
Apo	4005	4009	LERLD	4	644.349	4.401	0	100	1.15175	0.030503	28.7937	0.762575
Apo	4005	4009	LERLD	4	644.349	4.42568	0.029118	1000	1.65059	0.047307	41.2647	1.18268
BI8622	4008	4016	LDEGLRKED	8	1073.53	4.07191	0.021861	0	0	0	0	0
BI8622	4008	4016	LDEGLRKED	8	1073.53	4.32905	0.0615	10	3.2644	0.082807	40.805	1.03509
BI8622	4008	4016	LDEGLRKED	8	1073.53	4.09675	0.040401	30	3.45517	0.173228	43.1896	2.16535
BI8622	4008	4016	LDEGLRKED	8	1073.53	3.95028	0.004402	100	3.49045	0.044491	43.6306	0.556138
BI8622	4008	4016	LDEGLRKED	8	1073.53	4.06933	0	1000	3.60882	0.001969	45.1103	0.0246125
BI8626	4008	4016	LDEGLRKED	8	1073.53	4.09535	0.010787	0	0	0	0	0
BI8626	4008	4016	LDEGLRKED	8	1073.53	4.27413	0.012517	10	3.17339	0.069142	39.6674	0.864275
BI8626	4008	4016	LDEGLRKED	8	1073.53	4.15049	0.011201	30	3.34378	0.068854	41.7972	0.860675
BI8626	4008	4016	LDEGLRKED	8	1073.53	4.36991	0	100	3.42689	0.06112	42.8361	0.764
BI8626	4008	4016	LDEGLRKED	8	1073.53	4.06376	0	1000	3.40459	0.06112	42.5574	0.764
Apo	4008	4016	LDEGLRKED	8	1073.53	4.0389	0.020035	0	0	0	0	0
Apo	4008	4016	LDEGLRKED	8	1073.53	4.11537	0.058225	10	3.14486	0.101642	39.3107	1.27052
Apo	4008	4016	LDEGLRKED	8	1073.53	4.28375	0.017478	30	3.30696	0.11052	41.337	1.3815
Apo	4008	4016	LDEGLRKED	8	1073.53	4.01837	0	100	3.48667	0.043519	43.5834	0.543988
Apo	4008	4016	LDEGLRKED	8	1073.53	4.08776	0.032033	1000	3.51568	0.058076	43.946	0.72595
BI8622	4009	4017	DEGLRKEDM	8	1091.49	4.29765	0.03077	0	0	0	0	0
BI8622	4009	4017	DEGLRKEDM	8	1091.49	4.58464	0.145417	10	2.44937	0.087599	30.6171	1.09499
BI8622	4009	4017	DEGLRKEDM	8	1091.49	4.37486	0.028611	30	2.50327	0.063826	31.2909	0.797825
BI8622	4009	4017	DEGLRKEDM	8	1091.49	4.24949	0.004573	100	3.09465	0.030907	38.6832	0.386338
BI8622	4009	4017	DEGLRKEDM	8	1091.49	4.29422	0.006753	1000	3.27585	0.088636	40.9481	1.10795
BI8626	4009	4017	DEGLRKEDM	8	1091.49	4.30286	0.015626	0	0	0	0	0
BI8626	4009	4017	DEGLRKEDM	8	1091.49	4.43959	0.031679	10	2.48776	0.166304	31.097	2.0788
BI8626	4009	4017	DEGLRKEDM	8	1091.49	4.40131	0.017546	30	2.38432	0.132602	29.804	1.65752
BI8626	4009	4017	DEGLRKEDM	8	1091.49	4.29921	0	100	3.02065	0.068195	37.7582	0.852438
BI8626	4009	4017	DEGLRKEDM	8	1091.49	4.33829	0	1000	3.16632	0.068195	39.579	0.852438
Apo	4009	4017	DEGLRKEDM	8	1091.49	4.27754	0.015985	0	0	0	0	0
Apo	4009	4017	DEGLRKEDM	8	1091.49	4.3814	0.091541	10	2.49535	0.152704	31.1919	1.9088
Apo	4009	4017	DEGLRKEDM	8	1091.49	4.43939	0.012179	30	2.49884	0.127543	31.2354	1.59429
Apo	4009	4017	DEGLRKEDM	8	1091.49	4.28453	0	100	2.97803	0.112393	37.2254	1.40491
Apo	4009	4017	DEGLRKEDM	8	1091.49	4.34153	0.012431	1000	3.29059	0.213037	41.1324	2.66296
BI8622	4012	4016	LRKED	4	659.36	3.77432	0.02756	0	0	0	0	0
BI8622	4012	4016	LRKED	4	659.36	4.05428	0.124691	10	0.693931	0.057915	17.3483	1.44788
BI8622	4012	4016	LRKED	4	659.36	3.82693	0.031439	30	0.725007	0.07887	18.1252	1.97175
BI8622	4012	4016	LRKED	4	659.36	3.76581	0.008951	100	0.635853	0.225534	15.8963	5.63835
BI8622	4012	4016	LRKED	4	659.36	3.77394	0.008399	1000	0.69845	0.068692	17.4612	1.7173
BI8626	4012	4016	LRKED	4	659.36	3.79389	0.023696	0	0	0	0	0
BI8626	4012	4016	LRKED	4	659.36	3.96095	0.033991	10	0.630278	0.062129	15.7569	1.55322
BI8626	4012	4016	LRKED	4	659.36	3.90357	0.019403	30	0.668485	0.042107	16.7121	1.05268
BI8626	4012	4016	LRKED	4	659.36	3.90228	0	100	0.658095	0.022141	16.4524	0.553525
BI8626	4012	4016	LRKED	4	659.36	3.7769	0.018288	1000	0.682911	0.056971	17.0728	1.42427
Apo	4012	4016	LRKED	4	659.36	3.74065	0.00964	0	0	0	0	0
Apo	4012	4016	LRKED	4	659.36	3.84997	0.078799	10	0.671319	0.015606	16.783	0.39015
Apo	4012	4016	LRKED	4	659.36	3.99374	0.051725	30	0.717808	0.041524	17.9452	1.0381
Apo	4012	4016	LRKED	4	659.36	3.81471	0	100	0.60494	0.010802	15.1235	0.27005
Apo	4012	4016	LRKED	4	659.36	3.81754	0.040677	1000	0.670108	0.05942	16.7527	1.4855
BI8622	4017	4021	MAVHV	4	555.283	4.56637	0.040647	0	0	0	0	0
BI8622	4017	4021	MAVHV	4	555.283	4.61626	0.032628	10	0.111331	0.064626	2.78328	1.61565
BI8622	4017	4021	MAVHV	4	555.283	4.61264	0.043802	30	0.172794	0.016799	4.31985	0.419975
BI8622	4017	4021	MAVHV	4	555.283	4.53731	0.001852	100	0.209376	0.016914	5.2344	0.42285
BI8622	4017	4021	MAVHV	4	555.283	4.56884	0.007307	1000	0.343461	0.02882	8.58652	0.7205
BI8626	4017	4021	MAVHV	4	555.283	4.59357	0.035739	0	0	0	0	0
BI8626	4017	4021	MAVHV	4	555.283	4.72266	0.042533	10	0.11233	0.040966	2.80825	1.02415
BI8626	4017	4021	MAVHV	4	555.283	4.64475	0.013834	30	0.116839	0.031093	2.92097	0.777325
BI8626	4017	4021	MAVHV	4	555.283	4.58096	0	100	0.182704	0.020101	4.5676	0.502525
BI8626	4017	4021	MAVHV	4	555.283	4.58087	0.004115	1000	0.307973	0.037452	7.69932	0.9363
Apo	4017	4021	MAVHV	4	555.283	4.54406	0.02928	0	0	0	0	0
Apo	4017	4021	MAVHV	4	555.283	4.59187	0.006795	10	0.083978	0.071362	2.09945	1.78405
Apo	4017	4021	MAVHV	4	555.283	4.57616	0.021411	30	0.050386	0.018181	1.25965	0.454525
Apo	4017	4021	MAVHV	4	555.283	4.56829	0	100	0.192615	0.002775	4.81538	0.069375
Apo	4017	4021	MAVHV	4	555.283	4.59048	0.024209	1000	0.334342	0.005268	8.35855	0.1317
BI8622	4017	4022	MAVHVR	5	711.385	3.99362	0.018046	0	0	0	0	0
BI8622	4017	4022	MAVHVR	5	711.385	4.25573	0.123979	10	0.119424	0.026546	2.38848	0.53092
BI8622	4017	4022	MAVHVR	5	711.385	4.03612	0.054763	30	0.186043	0.018001	3.72086	0.36002
BI8622	4017	4022	MAVHVR	5	711.385	3.78946	0.010111	100	0.263393	0.014056	5.26786	0.28112
BI8622	4017	4022	MAVHVR	5	711.385	3.99454	0.012033	1000	0.37735	0.018102	7.547	0.36204
BI8626	4017	4022	MAVHVR	5	711.385	4.01978	0.016463	0	0	0	0	0
BI8626	4017	4022	MAVHVR	5	711.385	4.18458	0.042407	10	0.145521	0.058881	2.91042	1.17762
BI8626	4017	4022	MAVHVR	5	711.385	4.09604	0.022571	30	0.168561	0.034683	3.37122	0.69366
BI8626	4017	4022	MAVHVR	5	711.385	3.86787	0	100	0.262883	0.031635	5.25766	0.6327
BI8626	4017	4022	MAVHVR	5	711.385	3.98642	0.021684	1000	0.275433	0.047483	5.50866	0.94966
Apo	4017	4022	MAVHVR	5	711.385	3.96668	0.01674	0	0	0	0	0
Apo	4017	4022	MAVHVR	5	711.385	4.07625	0.102142	10	0.147018	0.041883	2.94036	0.83766
Apo	4017	4022	MAVHVR	5	711.385	4.18561	0.040852	30	0.140383	0.028705	2.80766	0.5741
Apo	4017	4022	MAVHVR	5	711.385	3.87615	0	100	0.25144	0.025652	5.0288	0.51304
Apo	4017	4022	MAVHVR	5	711.385	4.0235	0.041733	1000	0.32855	0.045541	6.571	0.91082
BI8622	4018	4028	AVHVRRDHVFE	10	1363.71	4.16554	0.027753	0	0	0	0	0
BI8622	4018	4028	AVHVRRDHVFE	10	1363.71	4.46404	0.134648	10	1.2629	0.063624	12.629	0.63624
BI8622	4018	4028	AVHVRRDHVFE	10	1363.71	4.26527	0	30	1.47567	0.040103	14.7567	0.40103
BI8622	4018	4028	AVHVRRDHVFE	10	1363.71	4.11463	0.006348	100	1.85223	0.049156	18.5223	0.49156
BI8622	4018	4028	AVHVRRDHVFE	10	1363.71	4.16941	0.006631	1000	1.9825	0.099258	19.825	0.99258
BI8626	4018	4028	AVHVRRDHVFE	10	1363.71	4.16935	0.019812	0	0	0	0	0
BI8626	4018	4028	AVHVRRDHVFE	10	1363.71	4.32042	0.033965	10	1.44405	0.158571	14.4405	1.58571
BI8626	4018	4028	AVHVRRDHVFE	10	1363.71	4.2766	0.020886	30	1.423	0.229259	14.23	2.29259
BI8626	4018	4028	AVHVRRDHVFE	10	1363.71	4.1688	0	100	1.95982	0.059584	19.5982	0.59584
BI8626	4018	4028	AVHVRRDHVFE	10	1363.71	4.21676	0	1000	2.05769	0.059584	20.5769	0.59584
Apo	4018	4028	AVHVRRDHVFE	10	1363.71	4.14957	0.003705	0	0	0	0	0
Apo	4018	4028	AVHVRRDHVFE	10	1363.71	4.25841	0.095533	10	1.51679	0.078635	15.1679	0.78635
Apo	4018	4028	AVHVRRDHVFE	10	1363.71	4.31384	0.008714	30	1.65573	0.071178	16.5573	0.71178
Apo	4018	4028	AVHVRRDHVFE	10	1363.71	4.14576	0	100	1.85113	0.068552	18.5113	0.68552
Apo	4018	4028	AVHVRRDHVFE	10	1363.71	4.21472	0.01493	1000	2.01555	0.195182	20.1555	1.95182
BI8622	4018	4030	AVHVRRDHVFEDS	12	1565.77	4.19804	0.027564	0	0	0	0	0
BI8622	4018	4030	AVHVRRDHVFEDS	12	1565.77	4.47841	0.143466	10	1.31697	0.095701	10.9747	0.797508
BI8622	4018	4030	AVHVRRDHVFEDS	12	1565.77	4.27287	0.033412	30	1.3014	0.199819	10.845	1.66516
BI8622	4018	4030	AVHVRRDHVFEDS	12	1565.77	4.15156	0.00469	100	1.62616	0.180038	13.5513	1.50032
BI8622	4018	4030	AVHVRRDHVFEDS	12	1565.77	4.20119	0.0091	1000	1.60413	0.125497	13.3678	1.04581
BI8626	4018	4030	AVHVRRDHVFEDS	12	1565.77	4.21456	0.013893	0	0	0	0	0
BI8626	4018	4030	AVHVRRDHVFEDS	12	1565.77	4.34734	0.032758	10	1.49326	0.155327	12.4438	1.29439
BI8626	4018	4030	AVHVRRDHVFEDS	12	1565.77	4.30721	0.020645	30	1.40697	0.368615	11.7247	3.07179
BI8626	4018	4030	AVHVRRDHVFEDS	12	1565.77	4.2028	0	100	1.50897	0.054378	12.5747	0.45315
BI8626	4018	4030	AVHVRRDHVFEDS	12	1565.77	4.24521	0	1000	1.55414	0.054378	12.9512	0.45315
Apo	4018	4030	AVHVRRDHVFEDS	12	1565.77	4.1823	0.02043	0	0	0	0	0
Apo	4018	4030	AVHVRRDHVFEDS	12	1565.77	4.28458	0.090473	10	1.41219	0.130928	11.7682	1.09107
Apo	4018	4030	AVHVRRDHVFEDS	12	1565.77	4.34848	0.016118	30	1.52163	0.214949	12.6802	1.79124
Apo	4018	4030	AVHVRRDHVFEDS	12	1565.77	4.17791	0	100	1.59929	0.127142	13.3274	1.05952
Apo	4018	4030	AVHVRRDHVFEDS	12	1565.77	4.24702	0.016506	1000	1.69828	0.261864	14.1523	2.1822
BI8622	4018	4031	AVHVRRDHVFEDSY	13	1728.83	4.44217	0.032855	0	0	0	0	0
BI8622	4018	4031	AVHVRRDHVFEDSY	13	1728.83	4.73276	0.146844	10	1.55638	0.060315	11.9722	0.463962
BI8622	4018	4031	AVHVRRDHVFEDSY	13	1728.83	4.52287	0.027331	30	1.72525	0.11048	13.2711	0.849846
BI8622	4018	4031	AVHVRRDHVFEDSY	13	1728.83	4.40191	0.004054	100	2.11669	0.037229	16.2822	0.286377
BI8622	4018	4031	AVHVRRDHVFEDSY	13	1728.83	4.43681	0.006328	1000	2.26353	0.058639	17.4118	0.451069
BI8626	4018	4031	AVHVRRDHVFEDSY	13	1728.83	4.43301	0.021881	0	0	0	0	0
BI8626	4018	4031	AVHVRRDHVFEDSY	13	1728.83	4.57254	0.031547	10	1.73062	0.118817	13.3125	0.913977
BI8626	4018	4031	AVHVRRDHVFEDSY	13	1728.83	4.54121	0.012763	30	1.8259	0.187069	14.0454	1.43899
BI8626	4018	4031	AVHVRRDHVFEDSY	13	1728.83	4.44344	0	100	2.18827	0.012435	16.8328	0.0956538
BI8626	4018	4031	AVHVRRDHVFEDSY	13	1728.83	4.47356	0	1000	2.24481	0.012435	17.2678	0.0956538
Apo	4018	4031	AVHVRRDHVFEDSY	13	1728.83	4.42399	0.012853	0	0	0	0	0
Apo	4018	4031	AVHVRRDHVFEDSY	13	1728.83	4.51918	0.085944	10	1.69044	0.043269	13.0034	0.332838
Apo	4018	4031	AVHVRRDHVFEDSY	13	1728.83	4.5781	0.010157	30	1.89783	0.026119	14.5987	0.200915
Apo	4018	4031	AVHVRRDHVFEDSY	13	1728.83	4.43333	0	100	2.00999	0.025267	15.4614	0.194362
Apo	4018	4031	AVHVRRDHVFEDSY	13	1728.83	4.48294	0.000624	1000	2.21292	0.111759	17.0225	0.859685
BI8622	4024	4028	DHVFE	4	645.275	4.58035	0.038632	0	0	0	0	0
BI8622	4024	4028	DHVFE	4	645.275	4.73017	0.099492	10	1.17017	0.052919	29.2542	1.32298
BI8622	4024	4028	DHVFE	4	645.275	4.62451	0.044377	30	1.23306	0.01412	30.8266	0.353
BI8622	4024	4028	DHVFE	4	645.275	4.54558	0.003663	100	1.25574	0.044802	31.3935	1.12005
BI8622	4024	4028	DHVFE	4	645.275	4.57498	0.004524	1000	1.34239	0.068363	33.5597	1.70907
BI8626	4024	4028	DHVFE	4	645.275	4.60877	0.034554	0	0	0	0	0
BI8626	4024	4028	DHVFE	4	645.275	4.74261	0.110359	10	1.08604	0.070291	27.1511	1.75728
BI8626	4024	4028	DHVFE	4	645.275	4.66333	0.016631	30	1.2276	0.037794	30.6899	0.94485
BI8626	4024	4028	DHVFE	4	645.275	4.58463	0	100	1.25835	0.01901	31.4588	0.47525
BI8626	4024	4028	DHVFE	4	645.275	4.59772	0.012944	1000	1.32969	0.085315	33.2421	2.13287
Apo	4024	4028	DHVFE	4	645.275	4.55464	0.029484	0	0	0	0	0
Apo	4024	4028	DHVFE	4	645.275	4.60115	0.003991	10	1.11551	0.020611	27.8878	0.515275
Apo	4024	4028	DHVFE	4	645.275	4.5798	0	100	1.32163	0.018528	33.0408	0.4632
Apo	4024	4028	DHVFE	4	645.275	4.60458	0.024574	1000	1.35256	0.055362	33.814	1.38405
BI8622	4024	4029	DHVFED	5	760.302	4.59268	0.040855	0	0	0	0	0
BI8622	4024	4029	DHVFED	5	760.302	4.81403	0.104452	10	1.09002	0.065911	21.8004	1.31822
BI8622	4024	4029	DHVFED	5	760.302	4.64105	0.045859	30	1.27755	0.024582	25.551	0.49164
BI8622	4024	4029	DHVFED	5	760.302	4.56371	0.002667	100	1.3636	0.009577	27.272	0.19154
BI8622	4024	4029	DHVFED	5	760.302	4.59107	0.004151	1000	1.43622	0.032412	28.7244	0.64824
BI8626	4024	4029	DHVFED	5	760.302	4.62393	0.033908	0	0	0	0	0
BI8626	4024	4029	DHVFED	5	760.302	4.7572	0.031246	10	1.11351	0.040619	22.2702	0.81238
BI8626	4024	4029	DHVFED	5	760.302	4.67918	0.016952	30	1.26121	0.040865	25.2242	0.8173
BI8626	4024	4029	DHVFED	5	760.302	4.6017	0	100	1.29861	0.036048	25.9722	0.72096
BI8626	4024	4029	DHVFED	5	760.302	4.60583	0.007843	1000	1.43529	0.041733	28.7059	0.83466
Apo	4024	4029	DHVFED	5	760.302	4.56721	0.026572	0	0	0	0	0
Apo	4024	4029	DHVFED	5	760.302	4.66188	0.078601	10	1.0386	0.053582	20.772	1.07164
Apo	4024	4029	DHVFED	5	760.302	4.76907	0.028301	30	1.20366	0.057978	24.0732	1.15956
Apo	4024	4029	DHVFED	5	760.302	4.59551	0	100	1.31878	0.037662	26.3756	0.75324
Apo	4024	4029	DHVFED	5	760.302	4.61498	0.022607	1000	1.41972	0.042482	28.3943	0.84964
BI8622	4025	4029	HVFED	4	645.275	4.39286	0.030601	0	0	0	0	0
BI8622	4025	4029	HVFED	4	645.275	4.62099	0.103818	10	0.668025	0.043126	16.7006	1.07815
BI8622	4025	4029	HVFED	4	645.275	4.43424	0.043819	30	0.795212	0.02734	19.8803	0.6835
BI8622	4025	4029	HVFED	4	645.275	4.35745	0.002965	100	0.825115	0.039759	20.6279	0.993975
BI8622	4025	4029	HVFED	4	645.275	4.39024	0.005452	1000	0.995248	0.028367	24.8812	0.709175
BI8626	4025	4029	HVFED	4	645.275	4.41818	0.019757	0	0	0	0	0
BI8626	4025	4029	HVFED	4	645.275	4.56273	0.035549	10	0.668631	0.037757	16.7158	0.943925
BI8626	4025	4029	HVFED	4	645.275	4.47843	0.014734	30	0.760117	0.039654	19.0029	0.99135
BI8626	4025	4029	HVFED	4	645.275	4.40631	0	100	0.78246	0.035327	19.5615	0.883175
BI8626	4025	4029	HVFED	4	645.275	4.39826	0.010576	1000	0.976646	0.037581	24.4162	0.939525
Apo	4025	4029	HVFED	4	645.275	4.36691	0.021193	0	0	0	0	0
Apo	4025	4029	HVFED	4	645.275	4.45549	0.077545	10	0.670592	0.024115	16.7648	0.602875
Apo	4025	4029	HVFED	4	645.275	4.57509	0.028666	30	0.731985	0.011294	18.2996	0.28235
Apo	4025	4029	HVFED	4	645.275	4.3917	0	100	0.859942	0.01058	21.4985	0.2645
Apo	4025	4029	HVFED	4	645.275	4.41697	0.030756	1000	0.985286	0.031081	24.6321	0.777025
BI8622	4028	4032	EDSYR	4	668.276	3.81838	0.019416	0	0	0	0	0
BI8622	4028	4032	EDSYR	4	668.276	4.07496	0.117012	10	0.081333	0.032639	2.03333	0.815975
BI8622	4028	4032	EDSYR	4	668.276	3.85454	0.055558	30	0.104361	0.012702	2.60902	0.31755
BI8622	4028	4032	EDSYR	4	668.276	3.72594	0.012768	100	0.135619	0.012712	3.39047	0.3178
BI8622	4028	4032	EDSYR	4	668.276	3.80156	0.015384	1000	0.128052	0.013738	3.2013	0.34345
BI8626	4028	4032	EDSYR	4	668.276	3.81846	0.015935	0	0	0	0	0
BI8626	4028	4032	EDSYR	4	668.276	3.97368	0.036686	10	0.116404	0.017726	2.9101	0.44315
BI8626	4028	4032	EDSYR	4	668.276	3.90126	0.017557	30	0.088613	0.023018	2.21532	0.57545
BI8626	4028	4032	EDSYR	4	668.276	3.76952	0	100	0.111075	0.009181	2.77687	0.229525
BI8626	4028	4032	EDSYR	4	668.276	3.78435	0.024567	1000	0.073149	0.02605	1.82873	0.65125
Apo	4028	4032	EDSYR	4	668.276	3.76279	0.021739	0	0	0	0	0
Apo	4028	4032	EDSYR	4	668.276	3.86609	0.084361	10	0.122929	0.040048	3.07322	1.0012
Apo	4028	4032	EDSYR	4	668.276	4.00429	0.046609	30	0.075378	0.041377	1.88445	1.03442
Apo	4028	4032	EDSYR	4	668.276	3.78364	0	100	0.07199	0.039218	1.79975	0.98045
Apo	4028	4032	EDSYR	4	668.276	3.81567	0.045191	1000	0.124842	0.042333	3.12105	1.05832
BI8622	4028	4034	EDSYREL	6	910.403	4.72114	0.050877	0	0	0	0	0
BI8622	4028	4034	EDSYREL	6	910.403	4.92068	0.088699	10	0.213075	0.052275	3.55125	0.87125
BI8622	4028	4034	EDSYREL	6	910.403	4.78278	0.041386	30	0.228325	0.007087	3.80542	0.118117
BI8622	4028	4034	EDSYREL	6	910.403	4.78296	0.000396	100	0.301796	0.006942	5.02993	0.1157
BI8622	4028	4034	EDSYREL	6	910.403	4.73142	0.002672	1000	0.500473	0.014717	8.34122	0.245283
BI8626	4028	4034	EDSYREL	6	910.403	4.77006	0.045594	0	0	0	0	0
BI8626	4028	4034	EDSYREL	6	910.403	4.92148	0.023133	10	0.259934	0.035925	4.33223	0.59875
BI8626	4028	4034	EDSYREL	6	910.403	4.85349	0.046293	30	0.216167	0.026524	3.60278	0.442067
BI8626	4028	4034	EDSYREL	6	910.403	4.81607	0	100	0.293434	0.018454	4.89057	0.307567
BI8626	4028	4034	EDSYREL	6	910.403	4.80847	0.043396	1000	0.39319	0.019231	6.55317	0.320517
Apo	4028	4034	EDSYREL	6	910.403	4.68682	0.038213	0	0	0	0	0
Apo	4028	4034	EDSYREL	6	910.403	4.87632	0.093435	10	0.198635	0.033534	3.31058	0.5589
Apo	4028	4034	EDSYREL	6	910.403	4.93691	0.022481	30	0.199633	0.034598	3.32722	0.576633
Apo	4028	4034	EDSYREL	6	910.403	4.74032	0	100	0.203299	0.026361	3.38832	0.43935
Apo	4028	4034	EDSYREL	6	910.403	4.75476	0.022786	1000	0.42474	0.032486	7.079	0.541433
BI8622	4031	4042	YRELHRKSPEEM	10	1573.77	3.95146	0.013501	0	0	0	0	0
BI8622	4031	4042	YRELHRKSPEEM	10	1573.77	4.27991	0.126925	10	1.38901	0.064102	13.8901	0.64102
BI8622	4031	4042	YRELHRKSPEEM	10	1573.77	4.03818	0.042661	30	1.51654	0.222989	15.1654	2.22989
BI8622	4031	4042	YRELHRKSPEEM	10	1573.77	3.75403	0.011321	100	1.72669	0.048138	17.2669	0.48138
BI8622	4031	4042	YRELHRKSPEEM	10	1573.77	3.96319	0.007417	1000	2.00573	0.060024	20.0573	0.60024
BI8626	4031	4042	YRELHRKSPEEM	10	1573.77	3.96846	0.017878	0	0	0	0	0
BI8626	4031	4042	YRELHRKSPEEM	10	1573.77	4.12399	0.039184	10	1.50556	0.134709	15.0556	1.34709
BI8626	4031	4042	YRELHRKSPEEM	10	1573.77	4.08007	0.021612	30	1.47774	0.215814	14.7774	2.15814
BI8626	4031	4042	YRELHRKSPEEM	10	1573.77	3.81691	0	100	1.74647	0.033977	17.4647	0.33977
BI8626	4031	4042	YRELHRKSPEEM	10	1573.77	4.01034	0	1000	2.18945	0.033977	21.8945	0.33977
Apo	4031	4042	YRELHRKSPEEM	10	1573.77	3.93737	0.012851	0	0	0	0	0
Apo	4031	4042	YRELHRKSPEEM	10	1573.77	4.03554	0.116887	10	1.59823	0.096758	15.9823	0.96758
Apo	4031	4042	YRELHRKSPEEM	10	1573.77	4.11081	0.020711	30	1.62225	0.187471	16.2225	1.87471
Apo	4031	4042	YRELHRKSPEEM	10	1573.77	3.82485	0	100	1.66904	0.047713	16.6904	0.47713
Apo	4031	4042	YRELHRKSPEEM	10	1573.77	4.00974	0.016023	1000	2.00017	0.139865	20.0017	1.39865
BI8622	4031	4046	YRELHRKSPEEMKNRL	14	2085.09	4.01116	0.020962	0	0	0	0	0
BI8622	4031	4046	YRELHRKSPEEMKNRL	14	2085.09	4.31872	0.151344	10	1.0933	0.127816	7.8093	0.912971
BI8622	4031	4046	YRELHRKSPEEMKNRL	14	2085.09	4.09622	0.022823	30	1.22655	0.120725	8.76109	0.862321
BI8622	4031	4046	YRELHRKSPEEMKNRL	14	2085.09	3.81822	0.00434	100	1.70023	0.084881	12.1445	0.606293
BI8622	4031	4046	YRELHRKSPEEMKNRL	14	2085.09	4.01608	0.011084	1000	3.00101	0.124324	21.4358	0.888029
BI8626	4031	4046	YRELHRKSPEEMKNRL	14	2085.09	4.03082	0.019666	0	0	0	0	0
BI8626	4031	4046	YRELHRKSPEEMKNRL	14	2085.09	4.17086	0.033814	10	1.25927	0.102013	8.99479	0.728664
BI8626	4031	4046	YRELHRKSPEEMKNRL	14	2085.09	4.14157	0.012056	30	1.33123	0.098852	9.50882	0.706086
BI8626	4031	4046	YRELHRKSPEEMKNRL	14	2085.09	3.94173	0	100	1.6978	0.051066	12.1271	0.364757
BI8626	4031	4046	YRELHRKSPEEMKNRL	14	2085.09	4.07038	0.002242	1000	2.85529	0.051067	20.395	0.364764
Apo	4031	4046	YRELHRKSPEEMKNRL	14	2085.09	3.99643	0.010736	0	0	0	0	0
Apo	4031	4046	YRELHRKSPEEMKNRL	14	2085.09	4.09785	0.10325	10	1.29639	0.088591	9.25994	0.632793
Apo	4031	4046	YRELHRKSPEEMKNRL	14	2085.09	4.16201	0.012746	30	1.48152	0.080659	10.5823	0.576136
Apo	4031	4046	YRELHRKSPEEMKNRL	14	2085.09	3.91835	0	100	1.73637	0.024973	12.4026	0.178379
Apo	4031	4046	YRELHRKSPEEMKNRL	14	2085.09	4.07126	0.007211	1000	3.09542	0.17227	22.1101	1.2305
BI8622	4035	4043	HRKSPEEMK	7	1140.57	3.77992	0.028806	0	0	0	0	0
BI8622	4035	4043	HRKSPEEMK	7	1140.57	4.05797	0.113994	10	0.864892	0.10305	12.3556	1.47214
BI8622	4035	4043	HRKSPEEMK	7	1140.57	3.83312	0.03202	30	0.952852	0.041092	13.6122	0.587029
BI8622	4035	4043	HRKSPEEMK	7	1140.57	3.7255	0.013783	100	0.874422	0.042986	12.4917	0.614086
BI8622	4035	4043	HRKSPEEMK	7	1140.57	3.77542	0.007885	1000	1.2709	0.086845	18.1557	1.24064
BI8626	4035	4043	HRKSPEEMK	7	1140.57	3.80412	0.020738	0	0	0	0	0
BI8626	4035	4043	HRKSPEEMK	7	1140.57	3.98505	0.03381	10	0.858328	0.06983	12.2618	0.997571
BI8626	4035	4043	HRKSPEEMK	7	1140.57	3.90722	0.017716	30	0.871924	0.053144	12.4561	0.7592
BI8626	4035	4043	HRKSPEEMK	7	1140.57	3.78222	0	100	0.997357	0.052763	14.248	0.753757
BI8626	4035	4043	HRKSPEEMK	7	1140.57	3.77525	0.00843	1000	1.09174	0.06701	15.5963	0.957286
Apo	4035	4043	HRKSPEEMK	7	1140.57	3.74613	0.009715	0	0	0	0	0
Apo	4035	4043	HRKSPEEMK	7	1140.57	3.84737	0.073889	10	0.826605	0.053795	11.8086	0.7685
Apo	4035	4043	HRKSPEEMK	7	1140.57	4.02106	0.049638	30	0.839406	0.034479	11.9915	0.492557
Apo	4035	4043	HRKSPEEMK	7	1140.57	3.78782	0	100	0.94678	0.029044	13.5254	0.414914
Apo	4035	4043	HRKSPEEMK	7	1140.57	3.82017	0.041776	1000	1.17172	0.080819	16.7389	1.15456
BI8622	4042	4047	MKNRLY	5	823.437	4.35874	0.027274	0	0	0	0	0
BI8622	4042	4047	MKNRLY	5	823.437	4.60046	0.121697	10	0.102747	0.016342	2.05494	0.32684
BI8622	4042	4047	MKNRLY	5	823.437	4.40523	0.049777	30	0.314889	0.027315	6.29778	0.5463
BI8622	4042	4047	MKNRLY	5	823.437	4.33021	0.00662	100	0.696324	0.026961	13.9265	0.53922
BI8622	4042	4047	MKNRLY	5	823.437	4.36685	0.008923	1000	1.51094	0.074061	30.2188	1.48122
BI8626	4042	4047	MKNRLY	5	823.437	4.38114	0.018962	0	0	0	0	0
BI8626	4042	4047	MKNRLY	5	823.437	4.53348	0.034077	10	0.255881	0.034581	5.11762	0.69162
BI8626	4042	4047	MKNRLY	5	823.437	4.4479	0.016389	30	0.319124	0.019466	6.38248	0.38932
BI8626	4042	4047	MKNRLY	5	823.437	4.38371	0	100	0.858074	0.017898	17.1615	0.35796
BI8626	4042	4047	MKNRLY	5	823.437	4.37814	0.021902	1000	1.48338	0.044336	29.6675	0.88672
Apo	4042	4047	MKNRLY	5	823.437	4.33295	0.0243	0	0	0	0	0
Apo	4042	4047	MKNRLY	5	823.437	4.42974	0.082468	10	0.212985	0.043271	4.2597	0.86542
Apo	4042	4047	MKNRLY	5	823.437	4.53915	0.029337	30	0.284985	0.065443	5.6997	1.30886
Apo	4042	4047	MKNRLY	5	823.437	4.36329	0	100	0.71779	0.027039	14.3558	0.54078
Apo	4042	4047	MKNRLY	5	823.437	4.3857	0.032423	1000	1.50035	0.059801	30.0069	1.19602
BI8622	4044	4047	NRLY	3	564.302	4.47949	0.033684	0	0	0	0	0
BI8622	4044	4047	NRLY	3	564.302	4.72342	0.140523	10	0.024178	0.04051	0.805933	1.35033
BI8622	4044	4047	NRLY	3	564.302	4.52832	0.047102	30	0.141661	0.022026	4.72203	0.7342
BI8622	4044	4047	NRLY	3	564.302	4.44608	0.003327	100	0.267223	0.01862	8.90743	0.620667
BI8622	4044	4047	NRLY	3	564.302	4.48039	0.007908	1000	0.5862	0.023115	19.54	0.7705
BI8626	4044	4047	NRLY	3	564.302	4.49854	0.025604	0	0	0	0	0
BI8626	4044	4047	NRLY	3	564.302	4.63382	0.038763	10	0.072197	0.046451	2.40657	1.54837
BI8626	4044	4047	NRLY	3	564.302	4.56997	0.017752	30	0.144245	0.024538	4.80817	0.817933
BI8626	4044	4047	NRLY	3	564.302	4.49157	0	100	0.237538	0.017631	7.91793	0.5877
BI8626	4044	4047	NRLY	3	564.302	4.49459	0.01934	1000	0.602918	0.02983	20.0973	0.994333
Apo	4044	4047	NRLY	3	564.302	4.45246	0.022637	0	0	0	0	0
Apo	4044	4047	NRLY	3	564.302	4.55684	0.084181	10	0.074646	0.040907	2.4882	1.36357
Apo	4044	4047	NRLY	3	564.302	4.64288	0.028959	30	0.10046	0.035154	3.34867	1.1718
Apo	4044	4047	NRLY	3	564.302	4.47996	0	100	0.29747	0.021653	9.91567	0.721767
Apo	4044	4047	NRLY	3	564.302	4.5104	0.026911	1000	0.573831	0.034712	19.1277	1.15707
BI8622	4046	4050	LYIVF	4	653.378	5.95275	0.212856	0	0	0	0	0
BI8622	4046	4050	LYIVF	4	653.378	6.19003	0.111135	10	0.022693	0.05353	0.567325	1.33825
BI8622	4046	4050	LYIVF	4	653.378	6.11177	0.02441	30	0.124106	0.022822	3.10265	0.57055
BI8622	4046	4050	LYIVF	4	653.378	6.09748	0.009757	100	0.16586	0.014881	4.1465	0.372025
BI8622	4046	4050	LYIVF	4	653.378	6.08336	0.002248	1000	0.919842	0.02778	22.9961	0.6945
BI8626	4046	4050	LYIVF	4	653.378	6.00008	0.174012	0	0	0	0	0
BI8626	4046	4050	LYIVF	4	653.378	6.12945	0.014771	10	0.085977	0.038785	2.14942	0.969625
BI8626	4046	4050	LYIVF	4	653.378	6.11191	0.006318	30	0.126523	0.026762	3.16308	0.66905
BI8626	4046	4050	LYIVF	4	653.378	6.10273	0	100	0.186746	0.015685	4.66865	0.392125
BI8626	4046	4050	LYIVF	4	653.378	6.08634	9.62939e-05	1000	0.929353	0.016229	23.2338	0.405725
Apo	4046	4050	LYIVF	4	653.378	5.80161	0.188564	0	0	0	0	0
Apo	4046	4050	LYIVF	4	653.378	6.11055	0.020461	10	0.112398	0.022188	2.80995	0.5547
Apo	4046	4050	LYIVF	4	653.378	6.14363	0.012575	30	0.138596	0.023727	3.4649	0.593175
Apo	4046	4050	LYIVF	4	653.378	6.08671	0	100	0.26945	0.007452	6.73625	0.1863
Apo	4046	4050	LYIVF	4	653.378	6.10345	0.002748	1000	0.974666	0.015805	24.3666	0.395125
BI8622	4047	4050	YIVF	3	540.294	5.74449	0.181689	0	0	0	0	0
BI8622	4047	4050	YIVF	3	540.294	6.02244	0.14096	10	0.008084	0.056548	0.269467	1.88493
BI8622	4047	4050	YIVF	3	540.294	5.92278	0.036781	30	0.085226	0.196641	2.84087	6.5547
BI8622	4047	4050	YIVF	3	540.294	5.85785	0.007844	100	0.304502	0.046925	10.1501	1.56417
BI8622	4047	4050	YIVF	3	540.294	5.85419	0.000922	1000	0.586178	0.03825	19.5393	1.275
BI8626	4047	4050	YIVF	3	540.294	5.76707	0.169828	0	0	0	0	0
BI8626	4047	4050	YIVF	3	540.294	5.91539	0.015764	10	0.045282	0.031561	1.5094	1.05203
BI8626	4047	4050	YIVF	3	540.294	5.89694	0.005889	30	0.11361	0.128175	3.787	4.2725
BI8626	4047	4050	YIVF	3	540.294	5.87067	0	100	0.328964	0.002463	10.9655	0.0821
BI8626	4047	4050	YIVF	3	540.294	5.87156	0.018088	1000	0.526836	0.070465	17.5612	2.34883
Apo	4047	4050	YIVF	3	540.294	5.62132	0.160812	0	0	0	0	0
Apo	4047	4050	YIVF	3	540.294	5.88783	0.030904	10	0.071139	0.055424	2.3713	1.84747
Apo	4047	4050	YIVF	3	540.294	5.93496	0.00695	30	0.136097	0.089854	4.53657	2.99513
Apo	4047	4050	YIVF	3	540.294	5.85964	0	100	0.37651	0.032976	12.5503	1.0992
Apo	4047	4050	YIVF	3	540.294	5.88309	0.00684	1000	0.562442	0.071432	18.7481	2.38107
BI8622	4051	4061	EGEEGQDAGGL	10	1060.43	4.73783	0.055842	0	0	0	0	0
BI8622	4051	4061	EGEEGQDAGGL	10	1060.43	5.04435	0.145543	10	3.83073	0.092777	38.3073	0.92777
BI8622	4051	4061	EGEEGQDAGGL	10	1060.43	4.81381	0.029082	30	3.90524	0.109617	39.0524	1.09617
BI8622	4051	4061	EGEEGQDAGGL	10	1060.43	4.71344	0.002079	100	3.97542	0.04608	39.7542	0.4608
BI8622	4051	4061	EGEEGQDAGGL	10	1060.43	4.73935	0.005121	1000	3.95077	0.050106	39.5077	0.50106
BI8626	4051	4061	EGEEGQDAGGL	10	1060.43	4.71254	0.044334	0	0	0	0	0
BI8626	4051	4061	EGEEGQDAGGL	10	1060.43	4.85603	0.026555	10	4.04788	0.187496	40.4788	1.87496
BI8626	4051	4061	EGEEGQDAGGL	10	1060.43	4.82869	0.006921	30	3.96219	0.18066	39.6219	1.8066
BI8626	4051	4061	EGEEGQDAGGL	10	1060.43	4.74164	0	100	4.03795	0.033439	40.3795	0.33439
BI8626	4051	4061	EGEEGQDAGGL	10	1060.43	4.7683	0.002923	1000	3.98856	0.088258	39.8856	0.88258
Apo	4051	4061	EGEEGQDAGGL	10	1060.43	4.67632	0.023796	0	0	0	0	0
Apo	4051	4061	EGEEGQDAGGL	10	1060.43	4.81275	0.083479	10	3.9656	0.03314	39.656	0.3314
Apo	4051	4061	EGEEGQDAGGL	10	1060.43	4.87225	0.011254	30	3.97367	0.100314	39.7367	1.00314
Apo	4051	4061	EGEEGQDAGGL	10	1060.43	4.73753	0	100	3.9348	0.022395	39.348	0.22395
Apo	4051	4061	EGEEGQDAGGL	10	1060.43	4.78043	0.00695	1000	4.03802	0.19132	40.3802	1.9132
BI8622	4051	4063	EGEEGQDAGGLLR	12	1329.62	4.75403	0.051389	0	0	0	0	0
BI8622	4051	4063	EGEEGQDAGGLLR	12	1329.62	4.96175	0.105985	10	5.28023	0.13746	44.002	1.1455
BI8622	4051	4063	EGEEGQDAGGLLR	12	1329.62	4.80228	0.042873	30	5.47476	0.054876	45.623	0.4573
BI8622	4051	4063	EGEEGQDAGGLLR	12	1329.62	4.74325	0.002782	100	5.0713	0.114833	42.2609	0.956942
BI8622	4051	4063	EGEEGQDAGGLLR	12	1329.62	4.75924	0.006748	1000	5.26496	0.020402	43.8746	0.170017
BI8626	4051	4063	EGEEGQDAGGLLR	12	1329.62	4.80206	0.051627	0	0	0	0	0
BI8626	4051	4063	EGEEGQDAGGLLR	12	1329.62	4.93081	0.026946	10	5.16001	0.188689	43.0001	1.57241
BI8626	4051	4063	EGEEGQDAGGLLR	12	1329.62	4.84019	0.009318	30	5.29408	0.151712	44.1173	1.26427
BI8626	4051	4063	EGEEGQDAGGLLR	12	1329.62	4.77254	0	100	5.19562	0.141395	43.2969	1.17829
BI8626	4051	4063	EGEEGQDAGGLLR	12	1329.62	4.77818	0.00162	1000	5.03714	0.141586	41.9761	1.17988
Apo	4051	4063	EGEEGQDAGGLLR	12	1329.62	4.72323	0.043306	0	0	0	0	0
Apo	4051	4063	EGEEGQDAGGLLR	12	1329.62	4.83217	0.075678	10	5.13658	0.122173	42.8048	1.01811
Apo	4051	4063	EGEEGQDAGGLLR	12	1329.62	4.93779	0.023446	30	5.28746	0.124275	44.0622	1.03563
Apo	4051	4063	EGEEGQDAGGLLR	12	1329.62	4.76677	0	100	5.02968	0.078902	41.914	0.657517
Apo	4051	4063	EGEEGQDAGGLLR	12	1329.62	4.77886	0.021767	1000	5.19877	0.079356	43.3231	0.6613
BI8622	4051	4064	EGEEGQDAGGLLRE	13	1458.66	4.81245	0.061735	0	0	0	0	0
BI8622	4051	4064	EGEEGQDAGGLLRE	13	1458.66	5.07768	0.154156	10	5.27996	0.189727	40.6151	1.45944
BI8622	4051	4064	EGEEGQDAGGLLRE	13	1458.66	4.8619	0.04468	30	5.73107	0.025899	44.0852	0.199223
BI8622	4051	4064	EGEEGQDAGGLLRE	13	1458.66	4.79772	0.001134	100	5.89779	0.016776	45.3676	0.129046
BI8622	4051	4064	EGEEGQDAGGLLRE	13	1458.66	4.82186	0.007999	1000	5.94549	0.087889	45.7346	0.676069
BI8626	4051	4064	EGEEGQDAGGLLRE	13	1458.66	4.8301	0.062454	0	0	0	0	0
BI8626	4051	4064	EGEEGQDAGGLLRE	13	1458.66	4.95004	0.029349	10	5.59091	0.151046	43.007	1.16189
BI8626	4051	4064	EGEEGQDAGGLLRE	13	1458.66	4.9024	0.015139	30	5.5987	0.106904	43.0669	0.822338
BI8626	4051	4064	EGEEGQDAGGLLRE	13	1458.66	4.82987	0	100	6.0981	0.038762	46.9085	0.298169
BI8626	4051	4064	EGEEGQDAGGLLRE	13	1458.66	4.84875	0.009053	1000	5.94846	0.322967	45.7574	2.48436
Apo	4051	4064	EGEEGQDAGGLLRE	13	1458.66	4.76931	0.047964	0	0	0	0	0
Apo	4051	4064	EGEEGQDAGGLLRE	13	1458.66	4.89365	0.078643	10	5.44226	0.071526	41.8635	0.5502
Apo	4051	4064	EGEEGQDAGGLLRE	13	1458.66	4.96856	0.022035	30	5.69456	0.103466	43.8043	0.795892
Apo	4051	4064	EGEEGQDAGGLLRE	13	1458.66	4.82314	0	100	5.78951	0.040617	44.5347	0.312438
Apo	4051	4064	EGEEGQDAGGLLRE	13	1458.66	4.86138	0.018393	1000	5.94934	0.263366	45.7641	2.02589
BI8622	4051	4065	EGEEGQDAGGLLREW	14	1644.74	5.39642	0.125103	0	0	0	0	0
BI8622	4051	4065	EGEEGQDAGGLLREW	14	1644.74	5.61249	0.105169	10	4.93498	0.281566	35.2498	2.01119
BI8622	4051	4065	EGEEGQDAGGLLREW	14	1644.74	5.50695	0.040846	30	5.31449	0.034748	37.9607	0.2482
BI8622	4051	4065	EGEEGQDAGGLLREW	14	1644.74	5.45487	0.00516	100	5.29324	0.054018	37.8089	0.385843
BI8622	4051	4065	EGEEGQDAGGLLREW	14	1644.74	5.46942	0.005249	1000	6.00072	0.045406	42.8623	0.324329
BI8626	4051	4065	EGEEGQDAGGLLREW	14	1644.74	5.44504	0.131206	0	0	0	0	0
BI8626	4051	4065	EGEEGQDAGGLLREW	14	1644.74	5.58196	0.023143	10	5.12406	0.087026	36.6004	0.621614
BI8626	4051	4065	EGEEGQDAGGLLREW	14	1644.74	5.53014	0.006245	30	5.15736	0.115399	36.8383	0.824279
BI8626	4051	4065	EGEEGQDAGGLLREW	14	1644.74	5.46932	0	100	5.44153	0.081273	38.8681	0.580521
BI8626	4051	4065	EGEEGQDAGGLLREW	14	1644.74	5.49642	0.007843	1000	5.89725	0.175971	42.1232	1.25694
Apo	4051	4065	EGEEGQDAGGLLREW	14	1644.74	5.31348	0.122353	0	0	0	0	0
Apo	4051	4065	EGEEGQDAGGLLREW	14	1644.74	5.51344	0.060761	10	4.9075	0.09367	35.0536	0.669071
Apo	4051	4065	EGEEGQDAGGLLREW	14	1644.74	5.61096	0.021614	30	5.17131	0.103591	36.9379	0.739936
Apo	4051	4065	EGEEGQDAGGLLREW	14	1644.74	5.46587	0	100	5.19375	0.066446	37.0982	0.474614
Apo	4051	4065	EGEEGQDAGGLLREW	14	1644.74	5.49413	0.021379	1000	5.90363	0.134492	42.1688	0.960657
BI8622	4057	4062	DAGGLL	5	544.285	5.24721	0.109767	0	0	0	0	0
BI8622	4057	4062	DAGGLL	5	544.285	5.4223	0.068002	10	1.90167	0.038793	38.0333	0.77586
BI8622	4057	4062	DAGGLL	5	544.285	5.37917	0.041091	30	1.99632	0.084066	39.9263	1.68132
BI8622	4057	4062	DAGGLL	5	544.285	5.30122	0.003999	100	1.83099	0.016717	36.6198	0.33434
BI8622	4057	4062	DAGGLL	5	544.285	5.31257	0.000927	1000	1.81184	0.024728	36.2369	0.49456
BI8626	4057	4062	DAGGLL	5	544.285	5.30622	0.117559	0	0	0	0	0
BI8626	4057	4062	DAGGLL	5	544.285	5.42515	0.028043	10	1.87545	0.078224	37.5091	1.56448
BI8626	4057	4062	DAGGLL	5	544.285	5.38912	0.004636	30	1.9464	0.061388	38.9281	1.22776
BI8626	4057	4062	DAGGLL	5	544.285	5.31764	0	100	1.88678	0.033311	37.7356	0.66622
BI8626	4057	4062	DAGGLL	5	544.285	5.37692	0	1000	1.93025	0.033311	38.605	0.66622
Apo	4057	4062	DAGGLL	5	544.285	5.19157	0.107981	0	0	0	0	0
Apo	4057	4062	DAGGLL	5	544.285	5.3558	0.057635	10	1.87961	0.029571	37.5922	0.59142
Apo	4057	4062	DAGGLL	5	544.285	5.44797	0.018299	30	1.94978	0.106155	38.9956	2.1231
Apo	4057	4062	DAGGLL	5	544.285	5.31365	0	100	1.84317	0.01657	36.8634	0.3314
Apo	4057	4062	DAGGLL	5	544.285	5.34936	0.012243	1000	1.89443	0.050535	37.8887	1.0107
BI8622	4057	4063	DAGGLLR	6	700.386	4.72173	0.051463	0	0	0	0	0
BI8622	4057	4063	DAGGLLR	6	700.386	4.93609	0.135648	10	2.3976	0.054397	39.9601	0.906617
BI8622	4057	4063	DAGGLLR	6	700.386	4.7727	0.03945	30	2.50987	0.035885	41.8312	0.598083
BI8622	4057	4063	DAGGLLR	6	700.386	4.70798	0.001581	100	2.48741	0.038245	41.4568	0.637417
BI8622	4057	4063	DAGGLLR	6	700.386	4.72845	0.006499	1000	2.43573	0.044759	40.5955	0.745983
BI8626	4057	4063	DAGGLLR	6	700.386	4.74392	0.04776	0	0	0	0	0
BI8626	4057	4063	DAGGLLR	6	700.386	4.87117	0.037385	10	2.41075	0.059016	40.1792	0.9836
BI8626	4057	4063	DAGGLLR	6	700.386	4.80201	0.013018	30	2.47918	0.071526	41.3197	1.1921
BI8626	4057	4063	DAGGLLR	6	700.386	4.75007	0	100	2.4383	0.019887	40.6383	0.33145
BI8626	4057	4063	DAGGLLR	6	700.386	4.73921	0.00995	1000	2.57654	0.028804	42.9424	0.480067
Apo	4057	4063	DAGGLLR	6	700.386	4.67827	0.033301	0	0	0	0	0
Apo	4057	4063	DAGGLLR	6	700.386	4.80234	0.079755	10	2.38678	0.058097	39.7797	0.968283
Apo	4057	4063	DAGGLLR	6	700.386	4.88733	0.026085	30	2.42453	0.072997	40.4088	1.21662
Apo	4057	4063	DAGGLLR	6	700.386	4.73198	0	100	2.40852	0.028528	40.142	0.475467
Apo	4057	4063	DAGGLLR	6	700.386	4.75185	0.022255	1000	2.45383	0.047889	40.8971	0.79815
BI8622	4057	4065	DAGGLLREW	8	1015.51	5.43696	0.137201	0	0	0	0	0
BI8622	4057	4065	DAGGLLREW	8	1015.51	5.6653	0.108156	10	2.88556	0.120407	36.0695	1.50509
BI8622	4057	4065	DAGGLLREW	8	1015.51	5.56055	0.03995	30	2.9779	0.034635	37.2238	0.432937
BI8622	4057	4065	DAGGLLREW	8	1015.51	5.52666	0.004732	100	3.38232	0.022566	42.279	0.282075
BI8622	4057	4065	DAGGLLREW	8	1015.51	5.52946	0.005716	1000	4.05844	0.056273	50.7305	0.703412
BI8626	4057	4065	DAGGLLREW	8	1015.51	5.50901	0.124742	0	0	0	0	0
BI8626	4057	4065	DAGGLLREW	8	1015.51	5.62153	0.01736	10	2.86966	0.051038	35.8707	0.637975
BI8626	4057	4065	DAGGLLREW	8	1015.51	5.57862	0.006939	30	3.07798	0.048776	38.4748	0.6097
BI8626	4057	4065	DAGGLLREW	8	1015.51	5.54328	0	100	3.38454	0.029375	42.3067	0.367188
BI8626	4057	4065	DAGGLLREW	8	1015.51	5.56551	0	1000	4.09504	0.029375	51.1881	0.367188
Apo	4057	4065	DAGGLLREW	8	1015.51	5.36435	0.136253	0	0	0	0	0
Apo	4057	4065	DAGGLLREW	8	1015.51	5.56435	0.041923	10	2.87093	0.066196	35.8867	0.82745
Apo	4057	4065	DAGGLLREW	8	1015.51	5.64851	0.009635	30	3.01354	0.065219	37.6693	0.815237
Apo	4057	4065	DAGGLLREW	8	1015.51	5.53426	0	100	3.34616	0.036577	41.827	0.457212
Apo	4057	4065	DAGGLLREW	8	1015.51	5.54654	0.01287	1000	4.10397	0.140902	51.2996	1.76127
BI8622	4058	4063	AGGLLR	5	585.359	4.52225	0.039627	0	0	0	0	0
BI8622	4058	4063	AGGLLR	5	585.359	4.75828	0.123372	10	2.33399	0.025429	46.6798	0.50858
BI8622	4058	4063	AGGLLR	5	585.359	4.56775	0.045519	30	2.46114	0.020152	49.2227	0.40304
BI8622	4058	4063	AGGLLR	5	585.359	4.49338	0.002671	100	2.36674	0.018535	47.3348	0.3707
BI8622	4058	4063	AGGLLR	5	585.359	4.52573	0.007492	1000	2.36485	0.013002	47.2971	0.26004
BI8626	4058	4063	AGGLLR	5	585.359	4.55253	0.03117	0	0	0	0	0
BI8626	4058	4063	AGGLLR	5	585.359	4.68635	0.044268	10	2.38178	0.044969	47.6356	0.89938
BI8626	4058	4063	AGGLLR	5	585.359	4.61085	0.015611	30	2.4444	0.062993	48.8879	1.25986
BI8626	4058	4063	AGGLLR	5	585.359	4.54038	0	100	2.47924	0.033784	49.5847	0.67568
BI8626	4058	4063	AGGLLR	5	585.359	4.53088	0.01063	1000	2.41264	0.035759	48.2528	0.71518
Apo	4058	4063	AGGLLR	5	585.359	4.49529	0.02239	0	0	0	0	0
Apo	4058	4063	AGGLLR	5	585.359	4.60391	0.08653	10	2.39513	0.061541	47.9027	1.23082
Apo	4058	4063	AGGLLR	5	585.359	4.70178	0.028601	30	2.46562	0.045682	49.3125	0.91364
Apo	4058	4063	AGGLLR	5	585.359	4.52575	0	100	2.40495	0.026896	48.0991	0.53792
Apo	4058	4063	AGGLLR	5	585.359	4.55179	0.030519	1000	2.41967	0.059709	48.3935	1.19418
BI8622	4058	4065	AGGLLREW	7	900.481	5.30318	0.117261	0	0	0	0	0
BI8622	4058	4065	AGGLLREW	7	900.481	5.51043	0.087358	10	2.5687	0.062329	36.6957	0.890414
BI8622	4058	4065	AGGLLREW	7	900.481	5.4354	0.040627	30	2.8307	0.03258	40.4385	0.465429
BI8622	4058	4065	AGGLLREW	7	900.481	5.39687	0.002601	100	2.99723	0.039636	42.8176	0.566229
BI8622	4058	4065	AGGLLREW	7	900.481	5.40332	0.001234	1000	3.73838	0.083746	53.4054	1.19637
BI8626	4058	4065	AGGLLREW	7	900.481	5.37958	0.114944	0	0	0	0	0
BI8626	4058	4065	AGGLLREW	7	900.481	5.48194	0.018063	10	2.50048	0.073085	35.7211	1.04407
BI8626	4058	4065	AGGLLREW	7	900.481	5.44561	0.007222	30	2.71804	0.055755	38.8292	0.7965
BI8626	4058	4065	AGGLLREW	7	900.481	5.40856	0	100	2.94211	0.050489	42.0301	0.721271
BI8626	4058	4065	AGGLLREW	7	900.481	5.43351	0.004632	1000	3.62145	0.050858	51.735	0.726543
Apo	4058	4065	AGGLLREW	7	900.481	5.23491	0.114134	0	0	0	0	0
Apo	4058	4065	AGGLLREW	7	900.481	5.4272	0.043954	10	2.46173	0.051186	35.1676	0.731229
Apo	4058	4065	AGGLLREW	7	900.481	5.50437	0.008166	30	2.66804	0.050105	38.1149	0.715786
Apo	4058	4065	AGGLLREW	7	900.481	5.40366	0	100	2.97335	0.034857	42.4765	0.497957
Apo	4058	4065	AGGLLREW	7	900.481	5.42274	0.012674	1000	3.66607	0.068015	52.3725	0.971643
BI8622	4061	4065	LLREW	4	715.401	5.09431	0.095187	0	0	0	0	0
BI8622	4061	4065	LLREW	4	715.401	5.28046	0.089773	10	0.811228	0.036438	20.2807	0.91095
BI8622	4061	4065	LLREW	4	715.401	5.19106	0.044794	30	1.04848	0.02561	26.212	0.64025
BI8622	4061	4065	LLREW	4	715.401	5.13582	0.000142	100	1.36501	0.028723	34.1253	0.718075
BI8622	4061	4065	LLREW	4	715.401	5.14758	0.003806	1000	1.94343	0.027525	48.5859	0.688125
BI8626	4061	4065	LLREW	4	715.401	5.16089	0.092861	0	0	0	0	0
BI8626	4061	4065	LLREW	4	715.401	5.27684	0.027907	10	0.80404	0.02786	20.101	0.6965
BI8626	4061	4065	LLREW	4	715.401	5.21712	0.011103	30	0.995081	0.024487	24.877	0.612175
BI8626	4061	4065	LLREW	4	715.401	5.16273	0	100	1.44928	0.017305	36.232	0.432625
BI8626	4061	4065	LLREW	4	715.401	5.17974	0.001015	1000	1.89825	0.018008	47.4562	0.4502
Apo	4061	4065	LLREW	4	715.401	5.05091	0.088166	0	0	0	0	0
Apo	4061	4065	LLREW	4	715.401	5.20391	0.063226	10	0.84282	0.023896	21.0705	0.5974
Apo	4061	4065	LLREW	4	715.401	5.28755	0.014976	30	1.02431	0.022687	25.6077	0.567175
Apo	4061	4065	LLREW	4	715.401	5.15578	0	100	1.36306	0.02138	34.0766	0.5345
Apo	4061	4065	LLREW	4	715.401	5.17459	0.015453	1000	1.9467	0.026198	48.6674	0.65495
BI8622	4067	4071	MIISR	4	618.352	4.39117	0.029866	0	0	0	0	0
BI8622	4067	4071	MIISR	4	618.352	4.62511	0.130637	10	-0.006528	0.077146	-0.1632	1.92865
BI8622	4067	4071	MIISR	4	618.352	4.43188	0.044166	30	0.015603	0.051114	0.390075	1.27785
BI8622	4067	4071	MIISR	4	618.352	4.3514	0.003772	100	-0.063227	0.02775	-1.58068	0.69375
BI8622	4067	4071	MIISR	4	618.352	4.38714	0.008835	1000	0.015815	0.062825	0.395375	1.57063
BI8626	4067	4071	MIISR	4	618.352	4.41064	0.022371	0	0	0	0	0
BI8626	4067	4071	MIISR	4	618.352	4.54374	0.036846	10	0.022031	0.08022	0.550775	2.0055
BI8626	4067	4071	MIISR	4	618.352	4.47703	0.018041	30	0.001208	0.066763	0.0302	1.66908
BI8626	4067	4071	MIISR	4	618.352	4.40099	0	100	-0.08229	0.06533	-2.05725	1.63325
BI8626	4067	4071	MIISR	4	618.352	4.39605	0.017194	1000	0.020097	0.07376	0.502425	1.844
Apo	4067	4071	MIISR	4	618.352	4.36337	0.020934	0	0	0	0	0
Apo	4067	4071	MIISR	4	618.352	4.46416	0.085512	10	-0.029222	0.030758	-0.73055	0.76895
Apo	4067	4071	MIISR	4	618.352	4.55734	0.030248	30	-0.035612	0.05077	-0.8903	1.26925
Apo	4067	4071	MIISR	4	618.352	4.38481	0	100	-0.021478	0.025214	-0.53695	0.63035
Apo	4067	4071	MIISR	4	618.352	4.41556	0.030019	1000	-0.022616	0.063621	-0.5654	1.59052
BI8622	4072	4077	EMFNPM	4	767.298	5.39178	0.123966	0	0	0	0	0
BI8622	4072	4077	EMFNPM	4	767.298	5.64757	0.118969	10	0.663533	0.052357	16.5883	1.30893
BI8622	4072	4077	EMFNPM	4	767.298	5.50611	0.044845	30	0.718321	0.046923	17.958	1.17308
BI8622	4072	4077	EMFNPM	4	767.298	5.45971	0.003206	100	0.636656	0.037125	15.9164	0.928125
BI8622	4072	4077	EMFNPM	4	767.298	5.47525	0.007714	1000	0.754192	0.046627	18.8548	1.16568
BI8626	4072	4077	EMFNPM	4	767.298	5.43565	0.128239	0	0	0	0	0
BI8626	4072	4077	EMFNPM	4	767.298	5.56959	0.023211	10	0.700161	0.047252	17.504	1.1813
BI8626	4072	4077	EMFNPM	4	767.298	5.52723	0.011981	30	0.726584	0.068422	18.1646	1.71055
BI8626	4072	4077	EMFNPM	4	767.298	5.478	0	100	0.593873	0.040894	14.8468	1.02235
BI8626	4072	4077	EMFNPM	4	767.298	5.49586	0	1000	0.837876	0.040894	20.9469	1.02235
Apo	4072	4077	EMFNPM	4	767.298	5.3137	0.125351	0	0	0	0	0
Apo	4072	4077	EMFNPM	4	767.298	5.51888	0.062128	10	0.706355	0.036339	17.6589	0.908475
Apo	4072	4077	EMFNPM	4	767.298	5.60312	0.011476	30	0.69263	0.045785	17.3157	1.14463
Apo	4072	4077	EMFNPM	4	767.298	5.47007	0	100	0.666171	0.034964	16.6543	0.8741
Apo	4072	4077	EMFNPM	4	767.298	5.49423	0.020971	1000	0.77833	0.058847	19.4582	1.47117
BI8622	4072	4078	EMFNPMY	5	930.361	5.54351	0.150196	0	0	0	0	0
BI8622	4072	4078	EMFNPMY	5	930.361	5.76688	0.09321	10	0.798207	0.042701	15.9641	0.85402
BI8622	4072	4078	EMFNPMY	5	930.361	5.67259	0.042827	30	0.880057	0.024214	17.6011	0.48428
BI8622	4072	4078	EMFNPMY	5	930.361	5.63177	0.005711	100	0.83413	0.011916	16.6826	0.23832
BI8622	4072	4078	EMFNPMY	5	930.361	5.63166	0.004383	1000	1.24878	0.022211	24.9756	0.44422
BI8626	4072	4078	EMFNPMY	5	930.361	5.60297	0.138379	0	0	0	0	0
BI8626	4072	4078	EMFNPMY	5	930.361	5.71769	0.018451	10	0.83413	0.037423	16.6826	0.74846
BI8626	4072	4078	EMFNPMY	5	930.361	5.6801	0.004583	30	0.863061	0.025746	17.2612	0.51492
BI8626	4072	4078	EMFNPMY	5	930.361	5.64938	0	100	0.759301	0.018195	15.186	0.3639
BI8626	4072	4078	EMFNPMY	5	930.361	5.67851	0.001151	1000	1.17393	0.020449	23.4786	0.40898
Apo	4072	4078	EMFNPMY	5	930.361	5.45025	0.139279	0	0	0	0	0
Apo	4072	4078	EMFNPMY	5	930.361	5.67316	0.042458	10	0.787168	0.04894	15.7434	0.9788
Apo	4072	4078	EMFNPMY	5	930.361	5.73423	0.002176	30	0.817765	0.047599	16.3553	0.95198
Apo	4072	4078	EMFNPMY	5	930.361	5.6378	0	100	0.821	0.043905	16.42	0.8781
Apo	4072	4078	EMFNPMY	5	930.361	5.65239	0.007028	1000	1.23885	0.136317	24.7771	2.72634
BI8622	4073	4078	MFNPMY	4	801.318	5.50734	0.145661	0	0	0	0	0
BI8622	4073	4078	MFNPMY	4	801.318	5.8131	0.141685	10	0.862433	0.054481	21.5608	1.36203
BI8622	4073	4078	MFNPMY	4	801.318	5.63769	0.038786	30	0.836781	0.034651	20.9195	0.866275
BI8622	4073	4078	MFNPMY	4	801.318	5.5638	0.00603	100	0.954598	0.034854	23.865	0.87135
BI8622	4073	4078	MFNPMY	4	801.318	5.56443	0.002956	1000	1.31504	0.04906	32.876	1.2265
BI8626	4073	4078	MFNPMY	4	801.318	5.4392	0.137931	0	0	0	0	0
BI8626	4073	4078	MFNPMY	4	801.318	5.64422	0.020629	10	0.897752	0.069628	22.4438	1.7407
BI8626	4073	4078	MFNPMY	4	801.318	5.6182	0.002958	30	0.868769	0.069948	21.7192	1.7487
BI8626	4073	4078	MFNPMY	4	801.318	5.57975	0	100	0.912863	0.052535	22.8216	1.31337
BI8626	4073	4078	MFNPMY	4	801.318	5.57441	0.005683	1000	1.23751	0.056972	30.9377	1.4243
Apo	4073	4078	MFNPMY	4	801.318	5.34568	0.090517	0	0	0	0	0
Apo	4073	4078	MFNPMY	4	801.318	5.61931	0.047375	10	0.923599	0.049659	23.09	1.24148
Apo	4073	4078	MFNPMY	4	801.318	5.6746	0.006257	30	0.904348	0.049956	22.6087	1.2489
Apo	4073	4078	MFNPMY	4	801.318	5.57042	0	100	0.957343	0.036779	23.9336	0.919475
Apo	4073	4078	MFNPMY	4	801.318	5.60197	0.006628	1000	1.33198	0.06321	33.2996	1.58025
BI8622	4073	4080	MFNPMYAL	6	985.44	5.86668	0.202103	0	0	0	0	0
BI8622	4073	4080	MFNPMYAL	6	985.44	6.0082	0.042412	10	1.09041	0.095192	18.1736	1.58653
BI8622	4073	4080	MFNPMYAL	6	985.44	6.04158	0	30	1.31631	0.075706	21.9385	1.26177
BI8622	4073	4080	MFNPMYAL	6	985.44	5.98333	0.015255	100	1.57273	0.077461	26.2122	1.29102
BI8622	4073	4080	MFNPMYAL	6	985.44	5.97085	0.00177	1000	1.97309	0.082817	32.8848	1.38028
BI8626	4073	4080	MFNPMYAL	6	985.44	5.76137	0.184556	0	0	0	0	0
BI8626	4073	4080	MFNPMYAL	6	985.44	6.02426	0.016244	10	1.18765	0.091543	19.7941	1.52572
BI8626	4073	4080	MFNPMYAL	6	985.44	6.0007	0.001795	30	1.47848	0.069988	24.6413	1.16647
BI8626	4073	4080	MFNPMYAL	6	985.44	5.99433	0	100	1.59241	0.031688	26.5402	0.528133
BI8626	4073	4080	MFNPMYAL	6	985.44	5.97073	0	1000	2.01857	0.031688	33.6429	0.528133
Apo	4073	4080	MFNPMYAL	6	985.44	5.6089	0.051133	0	0	0	0	0
Apo	4073	4080	MFNPMYAL	6	985.44	6.00215	0.026679	10	1.23164	0.042116	20.5273	0.701933
Apo	4073	4080	MFNPMYAL	6	985.44	6.049	0.012322	30	1.44013	0.045491	24.0022	0.758183
Apo	4073	4080	MFNPMYAL	6	985.44	5.97318	0	100	1.64123	0.02849	27.3538	0.474833
Apo	4073	4080	MFNPMYAL	6	985.44	6.00304	0.005172	1000	2.09371	0.076324	34.8952	1.27207
BI8622	4074	4078	FNPMY	3	670.278	5.25732	0.109421	0	0	0	0	0
BI8622	4074	4078	FNPMY	3	670.278	5.49783	0.117741	10	0.782394	0.037702	26.0798	1.25673
BI8622	4074	4078	FNPMY	3	670.278	5.37443	0.043921	30	0.832342	0.023426	27.7447	0.780867
BI8622	4074	4078	FNPMY	3	670.278	5.30896	0.00251	100	0.804582	0.022397	26.8194	0.746567
BI8622	4074	4078	FNPMY	3	670.278	5.32636	0.004697	1000	1.07955	0.037776	35.9849	1.2592
BI8626	4074	4078	FNPMY	3	670.278	5.30855	0.115533	0	0	0	0	0
BI8626	4074	4078	FNPMY	3	670.278	5.4252	0.022127	10	0.803092	0.039006	26.7697	1.3002
BI8626	4074	4078	FNPMY	3	670.278	5.38901	0.004998	30	0.831154	0.03771	27.7051	1.257
BI8626	4074	4078	FNPMY	3	670.278	5.33957	0	100	0.803736	0.036478	26.7912	1.21593
BI8626	4074	4078	FNPMY	3	670.278	5.37159	0.010685	1000	1.0611	0.056385	35.37	1.8795
Apo	4074	4078	FNPMY	3	670.278	5.18357	0.104395	0	0	0	0	0
Apo	4074	4078	FNPMY	3	670.278	5.36837	0.057677	10	0.815445	0.011484	27.1815	0.3828
Apo	4074	4078	FNPMY	3	670.278	5.44941	0.010415	30	0.786181	0.024858	26.206	0.8286
Apo	4074	4078	FNPMY	3	670.278	5.32845	0	100	0.823297	0.010883	27.4432	0.362767
Apo	4074	4078	FNPMY	3	670.278	5.35639	0.018352	1000	1.08959	0.053693	36.3196	1.78977
BI8622	4081	4085	FRTSP	3	606.312	4.19199	0.026424	0	0	0	0	0
BI8622	4081	4085	FRTSP	3	606.312	4.44287	0.133164	10	0.55058	0.050974	18.3527	1.69913
BI8622	4081	4085	FRTSP	3	606.312	4.23446	0.046048	30	0.620186	0.009142	20.6729	0.304733
BI8622	4081	4085	FRTSP	3	606.312	4.14054	0.006714	100	0.679776	0.012179	22.6592	0.405967
BI8622	4081	4085	FRTSP	3	606.312	4.19057	0.008832	1000	1.04748	0.032591	34.9161	1.08637
BI8626	4081	4085	FRTSP	3	606.312	4.21048	0.016711	0	0	0	0	0
BI8626	4081	4085	FRTSP	3	606.312	4.32359	0.028256	10	0.55002	0.03041	18.334	1.01367
BI8626	4081	4085	FRTSP	3	606.312	4.28571	0.019732	30	0.600875	0.035292	20.0292	1.1764
BI8626	4081	4085	FRTSP	3	606.312	4.19521	0	100	0.632138	0.029828	21.0713	0.994267
BI8626	4081	4085	FRTSP	3	606.312	4.1956	0.019626	1000	1.03362	0.064314	34.4539	2.1438
Apo	4081	4085	FRTSP	3	606.312	4.16454	0.018675	0	0	0	0	0
Apo	4081	4085	FRTSP	3	606.312	4.2671	0.087715	10	0.564863	0.023752	18.8288	0.791733
Apo	4081	4085	FRTSP	3	606.312	4.36523	0.03247	30	0.5518	0.040829	18.3933	1.36097
Apo	4081	4085	FRTSP	3	606.312	4.17197	0	100	0.6652	0.020878	22.1733	0.695933
Apo	4081	4085	FRTSP	3	606.312	4.21764	0.032178	1000	1.01149	0.059904	33.7164	1.9968
BI8622	4081	4088	FRTSPGDR	6	934.462	3.83683	0.015154	0	0	0	0	0
BI8622	4081	4088	FRTSPGDR	6	934.462	4.07705	0.115242	10	1.37196	0.121572	22.8659	2.0262
BI8622	4081	4088	FRTSPGDR	6	934.462	3.86182	0.05798	30	1.62679	0.016088	27.1132	0.268133
BI8622	4081	4088	FRTSPGDR	6	934.462	3.72295	0.01371	100	1.79281	0.018756	29.8801	0.3126
BI8622	4081	4088	FRTSPGDR	6	934.462	3.82649	0.011181	1000	2.23663	0.038244	37.2772	0.6374
BI8626	4081	4088	FRTSPGDR	6	934.462	3.84842	0.02261	0	0	0	0	0
BI8626	4081	4088	FRTSPGDR	6	934.462	4.00058	0.038675	10	1.36121	0.031075	22.6869	0.517917
BI8626	4081	4088	FRTSPGDR	6	934.462	3.92145	0.024341	30	1.52665	0.027984	25.4442	0.4664
BI8626	4081	4088	FRTSPGDR	6	934.462	3.76988	0	100	1.67742	0.011768	27.957	0.196133
BI8626	4081	4088	FRTSPGDR	6	934.462	3.81464	0.021469	1000	2.25194	0.013584	37.5323	0.2264
Apo	4081	4088	FRTSPGDR	6	934.462	3.79004	0.026596	0	0	0	0	0
Apo	4081	4088	FRTSPGDR	6	934.462	3.8929	0.09518	10	1.40999	0.038151	23.4998	0.63585
Apo	4081	4088	FRTSPGDR	6	934.462	4.01308	0.041828	30	1.51226	0.028855	25.2043	0.480917
Apo	4081	4088	FRTSPGDR	6	934.462	3.78575	0	100	1.80217	0.015451	30.0361	0.257517
Apo	4081	4088	FRTSPGDR	6	934.462	3.84736	0.045748	1000	2.19285	0.102174	36.5476	1.7029
BI8622	4081	4090	FRTSPGDRVT	8	1134.58	4.07731	0.020967	0	0	0	0	0
BI8622	4081	4090	FRTSPGDRVT	8	1134.58	4.32301	0.091547	10	2.15917	0.0509	26.9897	0.63625
BI8622	4081	4090	FRTSPGDRVT	8	1134.58	4.11368	0.044581	30	2.57611	0.014324	32.2014	0.17905
BI8622	4081	4090	FRTSPGDRVT	8	1134.58	3.9802	0.003466	100	3.15098	0.060684	39.3873	0.75855
BI8622	4081	4090	FRTSPGDRVT	8	1134.58	4.07437	0.003552	1000	4.01413	0.011857	50.1767	0.148212
BI8626	4081	4090	FRTSPGDRVT	8	1134.58	4.10079	0.012928	0	0	0	0	0
BI8626	4081	4090	FRTSPGDRVT	8	1134.58	4.27605	0.0231	10	2.10026	0.076069	26.2532	0.950862
BI8626	4081	4090	FRTSPGDRVT	8	1134.58	4.16368	0.018364	30	2.53933	0.071623	31.7416	0.895288
BI8626	4081	4090	FRTSPGDRVT	8	1134.58	4.51479	0	100	3.04246	0.069906	38.0308	0.873825
BI8626	4081	4090	FRTSPGDRVT	8	1134.58	4.07081	0.0085	1000	3.88008	0.069991	48.501	0.874887
Apo	4081	4090	FRTSPGDRVT	8	1134.58	4.04844	0.019687	0	0	0	0	0
Apo	4081	4090	FRTSPGDRVT	8	1134.58	4.13347	0.073958	10	2.12075	0.07006	26.5094	0.87575
Apo	4081	4090	FRTSPGDRVT	8	1134.58	4.27797	0.02787	30	2.55745	0.040865	31.9681	0.510813
Apo	4081	4090	FRTSPGDRVT	8	1134.58	4.04318	0	100	3.17179	0.037748	39.6473	0.47185
Apo	4081	4090	FRTSPGDRVT	8	1134.58	4.10002	0.033543	1000	3.99214	0.057457	49.9017	0.718213
BI8622	4081	4091	FRTSPGDRVTY	9	1297.64	4.44718	0.031517	0	0	0	0	0
BI8622	4081	4091	FRTSPGDRVTY	9	1297.64	4.7135	0.133144	10	1.89304	0.142	21.0337	1.57778
BI8622	4081	4091	FRTSPGDRVTY	9	1297.64	4.49008	0.04634	30	2.3556	0.095211	26.1733	1.0579
BI8622	4081	4091	FRTSPGDRVTY	9	1297.64	4.41268	0.003139	100	3.0004	0.019115	33.3378	0.212389
BI8622	4081	4091	FRTSPGDRVTY	9	1297.64	4.44389	0.006673	1000	3.72478	0.031159	41.3864	0.346211
BI8626	4081	4091	FRTSPGDRVTY	9	1297.64	4.46509	0.024421	0	0	0	0	0
BI8626	4081	4091	FRTSPGDRVTY	9	1297.64	4.59684	0.033053	10	1.872	0.049155	20.7999	0.546167
BI8626	4081	4091	FRTSPGDRVTY	9	1297.64	4.53176	0.016322	30	2.29981	0.0596	25.5535	0.662222
BI8626	4081	4091	FRTSPGDRVTY	9	1297.64	4.45357	0	100	2.96724	0.015732	32.9693	0.1748
BI8626	4081	4091	FRTSPGDRVTY	9	1297.64	4.46611	0.019361	1000	3.66513	0.024277	40.7237	0.269744
Apo	4081	4091	FRTSPGDRVTY	9	1297.64	4.42532	0.021953	0	0	0	0	0
Apo	4081	4091	FRTSPGDRVTY	9	1297.64	4.51906	0.078745	10	1.95426	0.069582	21.7141	0.773133
Apo	4081	4091	FRTSPGDRVTY	9	1297.64	4.60715	0.025686	30	2.33897	0.077309	25.9885	0.858989
Apo	4081	4091	FRTSPGDRVTY	9	1297.64	4.44667	0	100	2.91977	0.052806	32.4419	0.586733
Apo	4081	4091	FRTSPGDRVTY	9	1297.64	4.47514	0.026796	1000	3.74197	0.081187	41.5775	0.902078
BI8622	4081	4106	FRTSPGDRVTYTINPSSHCNPNHLSY	22	2962.38	4.64476	0.043628	0	0	0	0	0
BI8622	4081	4106	FRTSPGDRVTYTINPSSHCNPNHLSY	22	2962.38	4.92419	0.149764	10	4.60441	0.19549	20.9291	0.888591
BI8622	4081	4106	FRTSPGDRVTYTINPSSHCNPNHLSY	22	2962.38	4.73326	0.03303	30	5.28907	0.438066	24.0412	1.99121
BI8622	4081	4106	FRTSPGDRVTYTINPSSHCNPNHLSY	22	2962.38	4.61323	0.000527	100	6.5539	0.040615	29.7905	0.184614
BI8622	4081	4106	FRTSPGDRVTYTINPSSHCNPNHLSY	22	2962.38	4.64001	0.004499	1000	7.64658	0.115814	34.7572	0.526427
BI8626	4081	4106	FRTSPGDRVTYTINPSSHCNPNHLSY	22	2962.38	4.63631	0.033765	0	0	0	0	0
BI8626	4081	4106	FRTSPGDRVTYTINPSSHCNPNHLSY	22	2962.38	4.77635	0.029643	10	4.92821	0.246108	22.401	1.11867
BI8626	4081	4106	FRTSPGDRVTYTINPSSHCNPNHLSY	22	2962.38	4.74873	0.009285	30	5.35567	0.500624	24.3439	2.27556
BI8626	4081	4106	FRTSPGDRVTYTINPSSHCNPNHLSY	22	2962.38	4.64495	0	100	6.75898	0.095724	30.7226	0.435109
BI8626	4081	4106	FRTSPGDRVTYTINPSSHCNPNHLSY	22	2962.38	4.68282	0	1000	7.66641	0.095724	34.8473	0.435109
Apo	4081	4106	FRTSPGDRVTYTINPSSHCNPNHLSY	22	2962.38	4.60959	0.019119	0	0	0	0	0
Apo	4081	4106	FRTSPGDRVTYTINPSSHCNPNHLSY	22	2962.38	4.72712	0.08705	10	5.08301	0.167043	23.1046	0.759286
Apo	4081	4106	FRTSPGDRVTYTINPSSHCNPNHLSY	22	2962.38	4.78577	0.015038	30	5.73219	0.149393	26.0554	0.679059
Apo	4081	4106	FRTSPGDRVTYTINPSSHCNPNHLSY	22	2962.38	4.64286	0	100	6.40184	0.093036	29.0992	0.422891
Apo	4081	4106	FRTSPGDRVTYTINPSSHCNPNHLSY	22	2962.38	4.70697	0.013812	1000	7.604	0.353501	34.5637	1.60682
BI8622	4091	4095	YTINP	3	606.301	4.77677	0.055887	0	0	0	0	0
BI8622	4091	4095	YTINP	3	606.301	4.9985	0.141801	10	0.731774	0.025911	24.3925	0.8637
BI8622	4091	4095	YTINP	3	606.301	4.83687	0.040824	30	0.783547	0.019879	26.1182	0.662633
BI8622	4091	4095	YTINP	3	606.301	4.76389	6.61787e-05	100	0.765036	0.018831	25.5012	0.6277
BI8622	4091	4095	YTINP	3	606.301	4.78858	0.005071	1000	0.76504	0.020305	25.5013	0.676833
BI8626	4091	4095	YTINP	3	606.301	4.80901	0.057745	0	0	0	0	0
BI8626	4091	4095	YTINP	3	606.301	4.9268	0.036386	10	0.731607	0.028363	24.3869	0.945433
BI8626	4091	4095	YTINP	3	606.301	4.87042	0.010626	30	0.759157	0.026145	25.3052	0.8715
BI8626	4091	4095	YTINP	3	606.301	4.79584	0	100	0.747652	0.025963	24.9217	0.865433
BI8626	4091	4095	YTINP	3	606.301	4.81038	0.005969	1000	0.753507	0.026077	25.1169	0.869233
Apo	4091	4095	YTINP	3	606.301	4.74042	0.044809	0	0	0	0	0
Apo	4091	4095	YTINP	3	606.301	4.86111	0.076915	10	0.734713	0.025803	24.4904	0.8601
Apo	4091	4095	YTINP	3	606.301	4.94984	0.025948	30	0.734686	0.026397	24.4895	0.8799
Apo	4091	4095	YTINP	3	606.301	4.79397	0	100	0.704364	0.025782	23.4788	0.8594
Apo	4091	4095	YTINP	3	606.301	4.81972	0.020806	1000	0.73929	0.030801	24.643	1.0267
BI8622	4091	4102	YTINPSSHCNPN	9	1345.57	4.38514	0.02742	0	0	0	0	0
BI8622	4091	4102	YTINPSSHCNPN	9	1345.57	4.59656	0.13251	10	2.58957	0.087046	28.773	0.967178
BI8622	4091	4102	YTINPSSHCNPN	9	1345.57	4.41693	0.040833	30	2.79949	0.034321	31.1054	0.381344
BI8622	4091	4102	YTINPSSHCNPN	9	1345.57	4.34167	0.003059	100	2.73328	0.036219	30.3698	0.402433
BI8622	4091	4102	YTINPSSHCNPN	9	1345.57	4.37322	0.007164	1000	2.68965	0.139003	29.885	1.54448
BI8626	4091	4102	YTINPSSHCNPN	9	1345.57	4.40429	0.027424	0	0	0	0	0
BI8626	4091	4102	YTINPSSHCNPN	9	1345.57	4.5363	0.036667	10	2.63358	0.037201	29.262	0.413344
BI8626	4091	4102	YTINPSSHCNPN	9	1345.57	4.46053	0.013188	30	2.68732	0.031913	29.8591	0.354589
BI8626	4091	4102	YTINPSSHCNPN	9	1345.57	4.38279	0	100	2.6475	0.027057	29.4166	0.300633
BI8626	4091	4102	YTINPSSHCNPN	9	1345.57	4.38112	0.006776	1000	2.5883	0.02828	28.7589	0.314222
Apo	4091	4102	YTINPSSHCNPN	9	1345.57	4.36016	0.020482	0	0	0	0	0
Apo	4091	4102	YTINPSSHCNPN	9	1345.57	4.45138	0.081772	10	2.59296	0.053914	28.8106	0.599044
Apo	4091	4102	YTINPSSHCNPN	9	1345.57	4.54981	0.032587	30	2.63027	0.040621	29.2253	0.451344
Apo	4091	4102	YTINPSSHCNPN	9	1345.57	4.3745	0	100	2.66328	0.030083	29.592	0.334256
Apo	4091	4102	YTINPSSHCNPN	9	1345.57	4.39517	0.026876	1000	2.63511	0.128328	29.279	1.42587
BI8622	4091	4106	YTINPSSHCNPNHLSY	13	1845.81	4.64517	0.043281	0	0	0	0	0
BI8622	4091	4106	YTINPSSHCNPNHLSY	13	1845.81	4.86261	0.112935	10	3.2745	0.187055	25.1885	1.43888
BI8622	4091	4106	YTINPSSHCNPNHLSY	13	1845.81	4.69628	0.042692	30	3.64824	0.045942	28.0634	0.3534
BI8622	4091	4106	YTINPSSHCNPNHLSY	13	1845.81	4.61971	0.001638	100	3.94584	0.050448	30.3526	0.388062
BI8622	4091	4106	YTINPSSHCNPNHLSY	13	1845.81	4.64077	0.004407	1000	4.53963	0.09305	34.9203	0.715769
BI8626	4091	4106	YTINPSSHCNPNHLSY	13	1845.81	4.67819	0.045298	0	0	0	0	0
BI8626	4091	4106	YTINPSSHCNPNHLSY	13	1845.81	4.80783	0.036299	10	3.22788	0.066668	24.8298	0.512831
BI8626	4091	4106	YTINPSSHCNPNHLSY	13	1845.81	4.7435	0.008104	30	3.46888	0.066414	26.6837	0.510877
BI8626	4091	4106	YTINPSSHCNPNHLSY	13	1845.81	4.65566	0	100	3.78926	0.056031	29.1482	0.431008
BI8626	4091	4106	YTINPSSHCNPNHLSY	13	1845.81	4.66737	0.005012	1000	4.25298	0.056198	32.7152	0.432292
Apo	4091	4106	YTINPSSHCNPNHLSY	13	1845.81	4.61858	0.031364	0	0	0	0	0
Apo	4091	4106	YTINPSSHCNPNHLSY	13	1845.81	4.71289	0.073807	10	3.2661	0.069285	25.1238	0.532962
Apo	4091	4106	YTINPSSHCNPNHLSY	13	1845.81	4.82024	0.029257	30	3.45782	0.069686	26.5986	0.536046
Apo	4091	4106	YTINPSSHCNPNHLSY	13	1845.81	4.64803	0	100	3.90581	0.050363	30.0447	0.387408
Apo	4091	4106	YTINPSSHCNPNHLSY	13	1845.81	4.67894	0.032561	1000	4.40956	0.081139	33.9197	0.624146
BI8622	4092	4102	TINPSSHCNPN	8	1182.51	4.04988	0.020974	0	0	0	0	0
BI8622	4092	4102	TINPSSHCNPN	8	1182.51	4.28391	0.130627	10	1.88297	0.148584	23.5372	1.8573
BI8622	4092	4102	TINPSSHCNPN	8	1182.51	4.08611	0.037968	30	2.04593	0.059829	25.5741	0.747862
BI8622	4092	4102	TINPSSHCNPN	8	1182.51	3.90364	0.02256	100	1.87358	0.053053	23.4197	0.663162
BI8622	4092	4102	TINPSSHCNPN	8	1182.51	4.05344	0.009888	1000	2.01931	0.101618	25.2414	1.27022
BI8626	4092	4102	TINPSSHCNPN	8	1182.51	4.07201	0.015524	0	0	0	0	0
BI8626	4092	4102	TINPSSHCNPN	8	1182.51	4.231	0.031517	10	1.90644	0.093054	23.8305	1.16318
BI8626	4092	4102	TINPSSHCNPN	8	1182.51	4.13497	0.020587	30	1.93709	0.082824	24.2137	1.0353
BI8626	4092	4102	TINPSSHCNPN	8	1182.51	3.9846	0	100	1.97726	0.082717	24.7158	1.03396
BI8626	4092	4102	TINPSSHCNPN	8	1182.51	4.04677	0.006734	1000	1.92109	0.086689	24.0137	1.08361
Apo	4092	4102	TINPSSHCNPN	8	1182.51	4.01731	0.017698	0	0	0	0	0
Apo	4092	4102	TINPSSHCNPN	8	1182.51	4.12894	0.089487	10	1.82306	0.065508	22.7882	0.81885
Apo	4092	4102	TINPSSHCNPN	8	1182.51	4.2446	0.034878	30	1.8588	0.045986	23.235	0.574825
Apo	4092	4102	TINPSSHCNPN	8	1182.51	3.97335	0	100	1.8829	0.039289	23.5363	0.491112
Apo	4092	4102	TINPSSHCNPN	8	1182.51	4.06941	0.031784	1000	1.89857	0.076689	23.7321	0.958612
BI8622	4092	4106	TINPSSHCNPNHLSY	12	1682.75	4.51487	0.040259	0	0	0	0	0
BI8622	4092	4106	TINPSSHCNPNHLSY	12	1682.75	4.75705	0.133569	10	2.37717	0.211139	19.8097	1.75949
BI8622	4092	4106	TINPSSHCNPNHLSY	12	1682.75	4.56327	0.043236	30	2.76676	0.021027	23.0563	0.175225
BI8622	4092	4106	TINPSSHCNPNHLSY	12	1682.75	4.48344	0.003113	100	2.88028	0.026609	24.0023	0.221742
BI8622	4092	4106	TINPSSHCNPNHLSY	12	1682.75	4.51561	0.00524	1000	3.51937	0.070417	29.3281	0.586808
BI8626	4092	4106	TINPSSHCNPNHLSY	12	1682.75	4.53748	0.035025	0	0	0	0	0
BI8626	4092	4106	TINPSSHCNPNHLSY	12	1682.75	4.67462	0.041148	10	2.36681	0.102701	19.7234	0.855842
BI8626	4092	4106	TINPSSHCNPNHLSY	12	1682.75	4.60495	0.012848	30	2.59694	0.055284	21.6412	0.4607
BI8626	4092	4106	TINPSSHCNPNHLSY	12	1682.75	4.52688	0	100	2.87255	0.045346	23.9379	0.377883
BI8626	4092	4106	TINPSSHCNPNHLSY	12	1682.75	4.53991	0.014164	1000	3.33884	0.045401	27.8237	0.378342
Apo	4092	4106	TINPSSHCNPNHLSY	12	1682.75	4.48374	0.021769	0	0	0	0	0
Apo	4092	4106	TINPSSHCNPNHLSY	12	1682.75	4.59322	0.083583	10	2.34624	0.092832	19.552	0.7736
Apo	4092	4106	TINPSSHCNPNHLSY	12	1682.75	4.68365	0.038674	30	2.62952	0.097248	21.9126	0.8104
Apo	4092	4106	TINPSSHCNPNHLSY	12	1682.75	4.51911	0	100	2.95732	0.08703	24.6443	0.72525
Apo	4092	4106	TINPSSHCNPNHLSY	12	1682.75	4.55009	0.022029	1000	3.42487	0.106029	28.5406	0.883575
BI8622	4092	4107	TINPSSHCNPNHLSYF	13	1829.81	4.95121	0.074399	0	0	0	0	0
BI8622	4092	4107	TINPSSHCNPNHLSYF	13	1829.81	5.18576	0.131619	10	2.54019	0.205234	19.5399	1.57872
BI8622	4092	4107	TINPSSHCNPNHLSYF	13	1829.81	5.01142	0.04571	30	2.88821	0.028796	22.217	0.221508
BI8622	4092	4107	TINPSSHCNPNHLSYF	13	1829.81	4.9455	0.001969	100	3.11188	0.023283	23.9376	0.1791
BI8622	4092	4107	TINPSSHCNPNHLSYF	13	1829.81	4.96449	0.004496	1000	3.61733	0.104336	27.8256	0.802585
BI8626	4092	4107	TINPSSHCNPNHLSYF	13	1829.81	5.00904	0.076208	0	0	0	0	0
BI8626	4092	4107	TINPSSHCNPNHLSYF	13	1829.81	5.11806	0.028789	10	2.56184	0.07826	19.7065	0.602
BI8626	4092	4107	TINPSSHCNPNHLSYF	13	1829.81	5.05009	0.011567	30	2.87843	0.048659	22.1418	0.3743
BI8626	4092	4107	TINPSSHCNPNHLSYF	13	1829.81	4.9857	0	100	3.21658	0.026579	24.7429	0.204454
BI8626	4092	4107	TINPSSHCNPNHLSYF	13	1829.81	4.98713	0.00485	1000	3.61604	0.028535	27.8157	0.2195
Apo	4092	4107	TINPSSHCNPNHLSYF	13	1829.81	4.89509	0.063943	0	0	0	0	0
Apo	4092	4107	TINPSSHCNPNHLSYF	13	1829.81	5.05145	0.079824	10	2.5029	0.072581	19.2531	0.558315
Apo	4092	4107	TINPSSHCNPNHLSYF	13	1829.81	5.11819	0.01529	30	2.82148	0.103838	21.7037	0.798754
Apo	4092	4107	TINPSSHCNPNHLSYF	13	1829.81	4.97026	0	100	2.97526	0.028979	22.8866	0.222915
Apo	4092	4107	TINPSSHCNPNHLSYF	13	1829.81	4.99224	0.0197	1000	3.60662	0.18728	27.7432	1.44062
BI8622	4096	4106	SSHCNPNHLSY	9	1257.52	4.34979	0.028177	0	0	0	0	0
BI8622	4096	4106	SSHCNPNHLSY	9	1257.52	4.57924	0.133774	10	1.49252	0.096892	16.5836	1.07658
BI8622	4096	4106	SSHCNPNHLSY	9	1257.52	4.39373	0.049914	30	1.77411	0.039703	19.7124	0.441144
BI8622	4096	4106	SSHCNPNHLSY	9	1257.52	4.31536	0.00324	100	1.96485	0.033634	21.8317	0.373711
BI8622	4096	4106	SSHCNPNHLSY	9	1257.52	4.34924	0.006736	1000	2.46604	0.094954	27.4004	1.05504
BI8626	4096	4106	SSHCNPNHLSY	9	1257.52	4.36721	0.016358	0	0	0	0	0
BI8626	4096	4106	SSHCNPNHLSY	9	1257.52	4.51188	0.035071	10	1.48038	0.051286	16.4486	0.569844
BI8626	4096	4106	SSHCNPNHLSY	9	1257.52	4.43879	0.017291	30	1.68885	0.026673	18.765	0.296367
BI8626	4096	4106	SSHCNPNHLSY	9	1257.52	4.36305	0	100	1.88358	0.020336	20.9287	0.225956
BI8626	4096	4106	SSHCNPNHLSY	9	1257.52	4.36645	0.025412	1000	2.38216	0.069018	26.4684	0.766867
Apo	4096	4106	SSHCNPNHLSY	9	1257.52	4.31983	0.025996	0	0	0	0	0
Apo	4096	4106	SSHCNPNHLSY	9	1257.52	4.4233	0.084127	10	1.49766	0.061811	16.6407	0.686789
Apo	4096	4106	SSHCNPNHLSY	9	1257.52	4.51879	0.027509	30	1.68302	0.036749	18.7003	0.408322
Apo	4096	4106	SSHCNPNHLSY	9	1257.52	4.34844	0	100	1.96069	0.028896	21.7854	0.321067
Apo	4096	4106	SSHCNPNHLSY	9	1257.52	4.37505	0.030128	1000	2.46651	0.124118	27.4057	1.37909
BI8622	4098	4106	HCNPNHLSY	7	1083.46	4.33736	0.029225	0	0	0	0	0
BI8622	4098	4106	HCNPNHLSY	7	1083.46	4.62179	0.147765	10	1.18485	0.101472	16.9264	1.4496
BI8622	4098	4106	HCNPNHLSY	7	1083.46	4.42177	0.024361	30	1.49705	0.08015	21.3864	1.145
BI8622	4098	4106	HCNPNHLSY	7	1083.46	4.29269	0.004734	100	1.7847	0.063216	25.4957	0.903086
BI8622	4098	4106	HCNPNHLSY	7	1083.46	4.33392	0.006878	1000	2.23721	0.067582	31.9601	0.965457
BI8626	4098	4106	HCNPNHLSY	7	1083.46	4.34095	0.017903	0	0	0	0	0
BI8626	4098	4106	HCNPNHLSY	7	1083.46	4.47423	0.034036	10	1.30998	0.123594	18.7141	1.76563
BI8626	4098	4106	HCNPNHLSY	7	1083.46	4.43936	0.013073	30	1.54319	0.2614	22.0455	3.73429
BI8626	4098	4106	HCNPNHLSY	7	1083.46	4.34191	0	100	1.81814	0.04937	25.9734	0.705286
BI8626	4098	4106	HCNPNHLSY	7	1083.46	4.3784	0.006312	1000	2.28509	0.060521	32.6442	0.864586
Apo	4098	4106	HCNPNHLSY	7	1083.46	4.31974	0.018006	0	0	0	0	0
Apo	4098	4106	HCNPNHLSY	7	1083.46	4.41509	0.088939	10	1.37102	0.101258	19.586	1.44654
Apo	4098	4106	HCNPNHLSY	7	1083.46	4.47665	0.009863	30	1.53221	0.101207	21.8887	1.44581
Apo	4098	4106	HCNPNHLSY	7	1083.46	4.32768	0	100	1.75056	0.097665	25.0081	1.39521
Apo	4098	4106	HCNPNHLSY	7	1083.46	4.37783	0.013366	1000	2.22613	0.180933	31.8018	2.58476
BI8622	4107	4111	FKFVG	4	596.332	4.9602	0.077426	0	0	0	0	0
BI8622	4107	4111	FKFVG	4	596.332	5.25215	0.150976	10	0.029941	0.019067	0.748525	0.476675
BI8622	4107	4111	FKFVG	4	596.332	5.06032	0.034618	30	0.013675	0.012022	0.341875	0.30055
BI8622	4107	4111	FKFVG	4	596.332	4.96262	0.000939	100	0.06667	0.012194	1.66675	0.30485
BI8622	4107	4111	FKFVG	4	596.332	4.9845	0.004469	1000	0.048732	0.032137	1.2183	0.803425
BI8626	4107	4111	FKFVG	4	596.332	4.93289	0.080105	0	0	0	0	0
BI8626	4107	4111	FKFVG	4	596.332	5.10249	0.029979	10	0.04131	0.043329	1.03275	1.08322
BI8626	4107	4111	FKFVG	4	596.332	5.06715	0.010402	30	0.015392	0.041705	0.3848	1.04262
BI8626	4107	4111	FKFVG	4	596.332	4.99578	0	100	0.020356	0.039807	0.5089	0.995175
BI8626	4107	4111	FKFVG	4	596.332	5.01363	0.002167	1000	0.013256	0.050052	0.3314	1.2513
Apo	4107	4111	FKFVG	4	596.332	4.87502	0.03662	0	0	0	0	0
Apo	4107	4111	FKFVG	4	596.332	5.0659	0.082525	10	0.094889	0.02653	2.37223	0.66325
Apo	4107	4111	FKFVG	4	596.332	5.11442	0.011517	30	0.066584	0.024825	1.6646	0.620625
Apo	4107	4111	FKFVG	4	596.332	4.98399	0	100	0.071626	0.019525	1.79065	0.488125
Apo	4107	4111	FKFVG	4	596.332	5.0231	0.008951	1000	0.069802	0.030196	1.74505	0.7549
BI8622	4107	4123	FKFVGRIVAKAVYDNRL	16	1995.14	4.97812	0.081581	0	0	0	0	0
BI8622	4107	4123	FKFVGRIVAKAVYDNRL	16	1995.14	5.22666	0.162607	10	0.591102	0.059265	3.69439	0.370406
BI8622	4107	4123	FKFVGRIVAKAVYDNRL	16	1995.14	5.05166	0.045036	30	0.540926	0.204626	3.38079	1.27891
BI8622	4107	4123	FKFVGRIVAKAVYDNRL	16	1995.14	4.96383	0.001934	100	0.744388	0.026102	4.65243	0.163137
BI8622	4107	4123	FKFVGRIVAKAVYDNRL	16	1995.14	4.98113	0.00589	1000	0.769722	0.045351	4.81076	0.283444
BI8626	4107	4123	FKFVGRIVAKAVYDNRL	16	1995.14	5.02399	0.083118	0	0	0	0	0
BI8626	4107	4123	FKFVGRIVAKAVYDNRL	16	1995.14	5.14649	0.02906	10	0.743774	0.12357	4.64859	0.772312
BI8626	4107	4123	FKFVGRIVAKAVYDNRL	16	1995.14	5.09986	0.00808	30	0.653954	0.300654	4.08721	1.87909
BI8626	4107	4123	FKFVGRIVAKAVYDNRL	16	1995.14	5.0225	0	100	0.89864	0.033176	5.6165	0.20735
BI8626	4107	4123	FKFVGRIVAKAVYDNRL	16	1995.14	5.02721	0.004368	1000	0.736313	0.178775	4.60196	1.11734
Apo	4107	4123	FKFVGRIVAKAVYDNRL	16	1995.14	4.93195	0.066352	0	0	0	0	0
Apo	4107	4123	FKFVGRIVAKAVYDNRL	16	1995.14	5.06885	0.079928	10	0.590592	0.082499	3.6912	0.515619
Apo	4107	4123	FKFVGRIVAKAVYDNRL	16	1995.14	5.1339	0.018536	30	0.68196	0.108975	4.26225	0.681094
Apo	4107	4123	FKFVGRIVAKAVYDNRL	16	1995.14	4.98817	0	100	0.738263	0.032726	4.61414	0.204537
Apo	4107	4123	FKFVGRIVAKAVYDNRL	16	1995.14	5.01655	0.01509	1000	0.594854	0.172598	3.71784	1.07874
BI8622	4110	4115	VGRIVA	5	613.391	4.31356	0.031945	0	0	0	0	0
BI8622	4110	4115	VGRIVA	5	613.391	4.59133	0.122314	10	0.094208	0.020838	1.88416	0.41676
BI8622	4110	4115	VGRIVA	5	613.391	4.34808	0.046328	30	0.136356	0.020685	2.72712	0.4137
BI8622	4110	4115	VGRIVA	5	613.391	4.26969	0.004859	100	0.105671	0.019823	2.11342	0.39646
BI8622	4110	4115	VGRIVA	5	613.391	4.31614	0.010408	1000	0.126318	0.013161	2.52636	0.26322
BI8626	4110	4115	VGRIVA	5	613.391	4.32417	0.015356	0	0	0	0	0
BI8626	4110	4115	VGRIVA	5	613.391	4.46658	0.035795	10	0.139166	0.013048	2.78332	0.26096
BI8626	4110	4115	VGRIVA	5	613.391	4.39946	0.020279	30	0.124245	0.009471	2.4849	0.18942
BI8626	4110	4115	VGRIVA	5	613.391	4.32395	0	100	0.119784	0.007521	2.39568	0.15042
BI8626	4110	4115	VGRIVA	5	613.391	4.32365	0.029401	1000	0.123553	0.008333	2.47106	0.16666
Apo	4110	4115	VGRIVA	5	613.391	4.27829	0.022811	0	0	0	0	0
Apo	4110	4115	VGRIVA	5	613.391	4.39446	0.091115	10	0.156797	0.013313	3.13594	0.26626
Apo	4110	4115	VGRIVA	5	613.391	4.47761	0.026937	30	0.127853	0.014219	2.55706	0.28438
Apo	4110	4115	VGRIVA	5	613.391	4.30149	0	100	0.123424	0.000179	2.46848	0.00358
Apo	4110	4115	VGRIVA	5	613.391	4.34882	0.031093	1000	0.13563	0.011615	2.7126	0.2323
BI8622	4113	4119	IVAKAVY	6	762.464	4.46961	0.031829	0	0	0	0	0
BI8622	4113	4119	IVAKAVY	6	762.464	4.70472	0.074496	10	0.073533	0.020948	1.22555	0.349133
BI8622	4113	4119	IVAKAVY	6	762.464	4.51247	0.042766	30	0.11327	0.007873	1.88783	0.131217
BI8622	4113	4119	IVAKAVY	6	762.464	4.43792	0.003888	100	0.109938	0.014552	1.8323	0.242533
BI8622	4113	4119	IVAKAVY	6	762.464	4.46674	0.002507	1000	0.115654	0.008329	1.92757	0.138817
BI8626	4113	4119	IVAKAVY	6	762.464	4.5035	0.022089	0	0	0	0	0
BI8626	4113	4119	IVAKAVY	6	762.464	4.64571	0.027821	10	0.081289	0.027519	1.35482	0.45865
BI8626	4113	4119	IVAKAVY	6	762.464	4.55339	0.009916	30	0.085095	0.023909	1.41825	0.398483
BI8626	4113	4119	IVAKAVY	6	762.464	4.71283	0	100	0.055548	0.022476	0.9258	0.3746
BI8626	4113	4119	IVAKAVY	6	762.464	4.47748	0.002944	1000	0.092305	0.023628	1.53842	0.3938
Apo	4113	4119	IVAKAVY	6	762.464	4.44341	0.023665	0	0	0	0	0
Apo	4113	4119	IVAKAVY	6	762.464	4.49627	0.009325	10	0.071332	0.048801	1.18887	0.81335
Apo	4113	4119	IVAKAVY	6	762.464	4.65161	0.030088	30	0.078634	0.016701	1.31057	0.27835
Apo	4113	4119	IVAKAVY	6	762.464	4.47206	0	100	0.095115	0.015067	1.58525	0.251117
Apo	4113	4119	IVAKAVY	6	762.464	4.49183	0.027107	1000	0.070168	0.017555	1.16947	0.292583
BI8622	4116	4119	KAVY	3	479.274	4.17639	0.026529	0	0	0	0	0
BI8622	4116	4119	KAVY	3	479.274	4.43131	0.133504	10	-0.035092	0.016222	-1.16973	0.540733
BI8622	4116	4119	KAVY	3	479.274	4.22051	0.051365	30	-0.022928	0.007912	-0.764267	0.263733
BI8622	4116	4119	KAVY	3	479.274	4.11398	0.003851	100	-0.04673	0.008497	-1.55767	0.283233
BI8622	4116	4119	KAVY	3	479.274	4.17613	0.009798	1000	-0.054408	0.021671	-1.8136	0.722367
BI8626	4116	4119	KAVY	3	479.274	4.19226	0.012425	0	0	0	0	0
BI8626	4116	4119	KAVY	3	479.274	4.34358	0.03752	10	-0.011836	0.03737	-0.394533	1.24567
BI8626	4116	4119	KAVY	3	479.274	4.2682	0.024536	30	-0.016181	0.032039	-0.539367	1.06797
BI8626	4116	4119	KAVY	3	479.274	4.17859	0	100	-0.027697	0.031727	-0.923233	1.05757
BI8626	4116	4119	KAVY	3	479.274	4.17277	0.02884	1000	-0.043183	0.032708	-1.43943	1.09027
Apo	4116	4119	KAVY	3	479.274	4.14113	0.02267	0	0	0	0	0
Apo	4116	4119	KAVY	3	479.274	4.25071	0.089645	10	-0.018065	0.011444	-0.602167	0.381467
Apo	4116	4119	KAVY	3	479.274	4.35116	0.029678	30	-0.033629	0.020256	-1.12097	0.6752
Apo	4116	4119	KAVY	3	479.274	4.14716	0	100	-0.051277	0.00968	-1.70923	0.322667
Apo	4116	4119	KAVY	3	479.274	4.20402	0.035889	1000	-0.063067	0.010998	-2.10223	0.3666
BI8622	4116	4120	KAVYD	4	594.301	4.10791	0.0247	0	0	0	0	0
BI8622	4116	4120	KAVYD	4	594.301	4.36529	0.136665	10	0.015267	0.026488	0.381675	0.6622
BI8622	4116	4120	KAVYD	4	594.301	4.14958	0.05041	30	0.045636	0.015647	1.1409	0.391175
BI8622	4116	4120	KAVYD	4	594.301	4.01342	0.001225	100	0.065896	0.017131	1.6474	0.428275
BI8622	4116	4120	KAVYD	4	594.301	4.10565	0.011615	1000	0.051617	0.017404	1.29043	0.4351
BI8626	4116	4120	KAVYD	4	594.301	4.12537	0.011836	0	0	0	0	0
BI8626	4116	4120	KAVYD	4	594.301	4.27937	0.037481	10	0.073814	0.023132	1.84535	0.5783
BI8626	4116	4120	KAVYD	4	594.301	4.20248	0.025473	30	0.034795	0.017574	0.869875	0.43935
BI8626	4116	4120	KAVYD	4	594.301	4.08777	0	100	0.057249	0.017179	1.43122	0.429475
BI8626	4116	4120	KAVYD	4	594.301	4.10936	0.028718	1000	0.06776	0.031634	1.694	0.79085
Apo	4116	4120	KAVYD	4	594.301	4.07637	0.018985	0	0	0	0	0
Apo	4116	4120	KAVYD	4	594.301	4.18133	0.091831	10	0.068307	0.017076	1.70768	0.4269
Apo	4116	4120	KAVYD	4	594.301	4.28688	0.032773	30	0.034569	0.0148	0.864225	0.37
Apo	4116	4120	KAVYD	4	594.301	4.07086	0	100	0.056732	0.011442	1.4183	0.28605
Apo	4116	4120	KAVYD	4	594.301	4.13305	0.034428	1000	0.034647	0.030177	0.866175	0.754425
BI8622	4116	4123	KAVYDNRL	7	977.529	4.43232	0.03345	0	0	0	0	0
BI8622	4116	4123	KAVYDNRL	7	977.529	4.70438	0.145035	10	0.604646	0.066914	8.6378	0.955914
BI8622	4116	4123	KAVYDNRL	7	977.529	4.49244	0.044896	30	0.72216	0.060508	10.3166	0.8644
BI8622	4116	4123	KAVYDNRL	7	977.529	4.38993	0.003172	100	0.801591	0.055945	11.4513	0.799214
BI8622	4116	4123	KAVYDNRL	7	977.529	4.42675	0.005413	1000	0.799862	0.070747	11.4266	1.01067
BI8626	4116	4123	KAVYDNRL	7	977.529	4.43819	0.023853	0	0	0	0	0
BI8626	4116	4123	KAVYDNRL	7	977.529	4.57039	0.035347	10	0.630405	0.133844	9.00579	1.91206
BI8626	4116	4123	KAVYDNRL	7	977.529	4.52589	0.013921	30	0.661816	0.131975	9.45451	1.88536
BI8626	4116	4123	KAVYDNRL	7	977.529	4.43345	0	100	0.748126	0.124626	10.6875	1.78037
BI8626	4116	4123	KAVYDNRL	7	977.529	4.46305	0.01067	1000	0.749876	0.136303	10.7125	1.94719
Apo	4116	4123	KAVYDNRL	7	977.529	4.40754	0.01942	0	0	0	0	0
Apo	4116	4123	KAVYDNRL	7	977.529	4.51174	0.084316	10	0.737315	0.086277	10.5331	1.23253
Apo	4116	4123	KAVYDNRL	7	977.529	4.5775	0.022405	30	0.768288	0.097504	10.9755	1.39291
Apo	4116	4123	KAVYDNRL	7	977.529	4.42717	0	100	0.786377	0.086036	11.234	1.22909
Apo	4116	4123	KAVYDNRL	7	977.529	4.46732	0.016659	1000	0.806337	0.095472	11.5191	1.36389
BI8622	4117	4122	AVYDNR	5	736.35	4.04576	0.02175	0	0	0	0	0
BI8622	4117	4122	AVYDNR	5	736.35	4.25441	0.181413	10	0.076292	0.015083	1.52584	0.30166
BI8622	4117	4122	AVYDNR	5	736.35	4.09007	0.040406	30	0.130225	0.018399	2.6045	0.36798
BI8622	4117	4122	AVYDNR	5	736.35	3.87097	0.044139	100	0.033162	0.057545	0.66324	1.1509
BI8622	4117	4122	AVYDNR	5	736.35	4.05226	0.006062	1000	0.170475	0.020989	3.4095	0.41978
BI8626	4117	4122	AVYDNR	5	736.35	4.07246	0.013665	0	0	0	0	0
BI8626	4117	4122	AVYDNR	5	736.35	4.23075	0.036685	10	0.074644	0.03857	1.49288	0.7714
BI8626	4117	4122	AVYDNR	5	736.35	4.13877	0.020664	30	0.115787	0.037671	2.31574	0.75342
BI8626	4117	4122	AVYDNR	5	736.35	3.96642	0	100	0.113133	0.037578	2.26266	0.75156
BI8626	4117	4122	AVYDNR	5	736.35	4.04995	0.010176	1000	0.106016	0.039245	2.12032	0.7849
Apo	4117	4122	AVYDNR	5	736.35	4.01618	0.017426	0	0	0	0	0
Apo	4117	4122	AVYDNR	5	736.35	4.1241	0.089628	10	0.087766	0.046077	1.75532	0.92154
Apo	4117	4122	AVYDNR	5	736.35	4.23562	0.038467	30	0.06848	0.043992	1.3696	0.87984
Apo	4117	4122	AVYDNR	5	736.35	3.96551	0	100	0.059383	0.042254	1.18766	0.84508
Apo	4117	4122	AVYDNR	5	736.35	4.0742	0.027359	1000	0.11346	0.0439	2.2692	0.878
BI8622	4120	4123	DNRL	3	516.265	4.24433	0.028821	0	0	0	0	0
BI8622	4120	4123	DNRL	3	516.265	4.48457	0.126774	10	0.523803	0.023831	17.4601	0.794367
BI8622	4120	4123	DNRL	3	516.265	4.28777	0.049466	30	0.635011	0.016379	21.167	0.545967
BI8622	4120	4123	DNRL	3	516.265	4.19063	0.004436	100	0.624068	0.005054	20.8023	0.168467
BI8622	4120	4123	DNRL	3	516.265	4.2457	0.011316	1000	0.635246	0.007856	21.1749	0.261867
BI8626	4120	4123	DNRL	3	516.265	4.26248	0.011875	0	0	0	0	0
BI8626	4120	4123	DNRL	3	516.265	4.41827	0.032651	10	0.485014	0.060395	16.1671	2.01317
BI8626	4120	4123	DNRL	3	516.265	4.33493	0.023133	30	0.606583	0.060866	20.2194	2.02887
BI8626	4120	4123	DNRL	3	516.265	4.25182	0	100	0.620488	0.050506	20.6829	1.68353
BI8626	4120	4123	DNRL	3	516.265	4.24163	0.024641	1000	0.6217	0.050577	20.7233	1.6859
Apo	4120	4123	DNRL	3	516.265	4.20994	0.020624	0	0	0	0	0
Apo	4120	4123	DNRL	3	516.265	4.31928	0.088526	10	0.492241	0.051054	16.408	1.7018
Apo	4120	4123	DNRL	3	516.265	4.42468	0.027487	30	0.576431	0.061318	19.2144	2.04393
Apo	4120	4123	DNRL	3	516.265	4.224	0	100	0.601014	0.044616	20.0338	1.4872
Apo	4120	4123	DNRL	3	516.265	4.26675	0.037399	1000	0.599552	0.052528	19.9851	1.75093
BI8622	4127	4130	YFTR	3	585.291	4.34813	0.028893	0	0	0	0	0
BI8622	4127	4130	YFTR	3	585.291	4.58537	0.131884	10	0.343718	0.048221	11.4573	1.60737
BI8622	4127	4130	YFTR	3	585.291	4.3905	0.045815	30	0.512982	0.018893	17.0994	0.629767
BI8622	4127	4130	YFTR	3	585.291	4.30795	0.005025	100	0.58419	0.018018	19.473	0.6006
BI8622	4127	4130	YFTR	3	585.291	4.34688	0.007783	1000	0.606258	0.033179	20.2086	1.10597
BI8626	4127	4130	YFTR	3	585.291	4.36768	0.017494	0	0	0	0	0
BI8626	4127	4130	YFTR	3	585.291	4.50584	0.037203	10	0.339392	0.025224	11.3131	0.8408
BI8626	4127	4130	YFTR	3	585.291	4.43633	0.018217	30	0.485104	0.024651	16.1701	0.8217
BI8626	4127	4130	YFTR	3	585.291	4.36024	0	100	0.563683	0.01886	18.7894	0.628667
BI8626	4127	4130	YFTR	3	585.291	4.34979	0.017711	1000	0.632654	0.021139	21.0885	0.704633
Apo	4127	4130	YFTR	3	585.291	4.31993	0.021014	0	0	0	0	0
Apo	4127	4130	YFTR	3	585.291	4.42353	0.086742	10	0.350307	0.066551	11.6769	2.21837
Apo	4127	4130	YFTR	3	585.291	4.51886	0.03027	30	0.475564	0.06666	15.8521	2.222
Apo	4127	4130	YFTR	3	585.291	4.34125	0	100	0.585036	0.064087	19.5012	2.13623
Apo	4127	4130	YFTR	3	585.291	4.37193	0.030626	1000	0.59029	0.069588	19.6763	2.3196
BI8622	4128	4132	FTRSF	4	656.328	4.67277	0.044768	0	0	0	0	0
BI8622	4128	4132	FTRSF	4	656.328	4.91139	0.133082	10	0.806518	0.066508	20.1629	1.6627
BI8622	4128	4132	FTRSF	4	656.328	4.72844	0.046653	30	1.04502	0.012513	26.1255	0.312825
BI8622	4128	4132	FTRSF	4	656.328	4.64325	0.002907	100	1.15191	0.013998	28.7978	0.34995
BI8622	4128	4132	FTRSF	4	656.328	4.68034	0.003841	1000	1.40047	0.015012	35.0117	0.3753
BI8626	4128	4132	FTRSF	4	656.328	4.6943	0.04348	0	0	0	0	0
BI8626	4128	4132	FTRSF	4	656.328	4.82132	0.035734	10	0.769735	0.052096	19.2434	1.3024
BI8626	4128	4132	FTRSF	4	656.328	4.76106	0.012159	30	0.979329	0.045254	24.4832	1.13135
BI8626	4128	4132	FTRSF	4	656.328	4.69643	0	100	1.11145	0.041	27.7863	1.025
BI8626	4128	4132	FTRSF	4	656.328	4.70868	0.01308	1000	1.37161	0.051142	34.2903	1.27855
Apo	4128	4132	FTRSF	4	656.328	4.63444	0.029762	0	0	0	0	0
Apo	4128	4132	FTRSF	4	656.328	4.76424	0.079214	10	0.755338	0.040028	18.8834	1.0007
Apo	4128	4132	FTRSF	4	656.328	4.83805	0.0258	30	0.944487	0.047706	23.6122	1.19265
Apo	4128	4132	FTRSF	4	656.328	4.68307	0	100	1.08647	0.036934	27.1618	0.92335
Apo	4128	4132	FTRSF	4	656.328	4.71372	0.024149	1000	1.33336	0.041092	33.3341	1.0273
BI8622	4129	4146	TRSFYKHILGKSVRYTDM	17	2201.14	4.60831	0.042574	0	0	0	0	0
BI8622	4129	4146	TRSFYKHILGKSVRYTDM	17	2201.14	4.88755	0.162104	10	3.25137	0.111201	19.1257	0.654124
BI8622	4129	4146	TRSFYKHILGKSVRYTDM	17	2201.14	4.70616	0	30	3.36117	0.046139	19.7716	0.271406
BI8622	4129	4146	TRSFYKHILGKSVRYTDM	17	2201.14	4.56817	0.0024	100	3.6748	0.046931	21.6164	0.276065
BI8622	4129	4146	TRSFYKHILGKSVRYTDM	17	2201.14	4.59799	0.005444	1000	4.62979	0.075711	27.234	0.445359
BI8626	4129	4146	TRSFYKHILGKSVRYTDM	17	2201.14	4.59386	0.028998	0	0	0	0	0
BI8626	4129	4146	TRSFYKHILGKSVRYTDM	17	2201.14	4.73365	0.02591	10	3.44416	0.165367	20.2598	0.972747
BI8626	4129	4146	TRSFYKHILGKSVRYTDM	17	2201.14	4.71069	0.007392	30	3.53854	0.138824	20.8149	0.816612
BI8626	4129	4146	TRSFYKHILGKSVRYTDM	17	2201.14	4.60548	0	100	3.84562	0.020864	22.6213	0.122729
BI8626	4129	4146	TRSFYKHILGKSVRYTDM	17	2201.14	4.62839	0	1000	4.74278	0.020864	27.8987	0.122729
Apo	4129	4146	TRSFYKHILGKSVRYTDM	17	2201.14	4.57435	0.014718	0	0	0	0	0
Apo	4129	4146	TRSFYKHILGKSVRYTDM	17	2201.14	4.67409	0.085055	10	3.66329	0.136124	21.5488	0.800729
Apo	4129	4146	TRSFYKHILGKSVRYTDM	17	2201.14	4.74063	0.009033	30	3.78095	0.130883	22.2409	0.7699
Apo	4129	4146	TRSFYKHILGKSVRYTDM	17	2201.14	4.59989	0	100	3.84633	0.124572	22.6255	0.732776
Apo	4129	4146	TRSFYKHILGKSVRYTDM	17	2201.14	4.63699	0.001574	1000	4.91704	0.19324	28.9237	1.13671
BI8622	4131	4135	SFYKH	4	680.328	4.08995	0.023575	0	0	0	0	0
BI8622	4131	4135	SFYKH	4	680.328	4.33177	0.133692	10	0.071372	0.034186	1.7843	0.85465
BI8622	4131	4135	SFYKH	4	680.328	4.12997	0.050149	30	0.064748	0.020478	1.6187	0.51195
BI8622	4131	4135	SFYKH	4	680.328	3.99448	0.003885	100	-0.062897	0.007129	-1.57242	0.178225
BI8622	4131	4135	SFYKH	4	680.328	4.09241	0.008417	1000	-0.004973	0.045516	-0.124325	1.1379
BI8626	4131	4135	SFYKH	4	680.328	4.10987	0.012553	0	0	0	0	0
BI8626	4131	4135	SFYKH	4	680.328	4.26608	0.037733	10	0.048626	0.034285	1.21565	0.857125
BI8626	4131	4135	SFYKH	4	680.328	4.18626	0.023865	30	0.030564	0.031644	0.7641	0.7911
BI8626	4131	4135	SFYKH	4	680.328	4.07589	0	100	0.017565	0.022084	0.439125	0.5521
BI8626	4131	4135	SFYKH	4	680.328	4.08769	0.018528	1000	0.006937	0.028925	0.173425	0.723125
Apo	4131	4135	SFYKH	4	680.328	4.05938	0.020446	0	0	0	0	0
Apo	4131	4135	SFYKH	4	680.328	4.16045	0.088465	10	0.113498	0.047049	2.83745	1.17623
Apo	4131	4135	SFYKH	4	680.328	4.27124	0.033495	30	0.057591	0.040017	1.43978	1.00042
Apo	4131	4135	SFYKH	4	680.328	4.05782	0	100	-0.048308	0.038064	-1.2077	0.9516
Apo	4131	4135	SFYKH	4	680.328	4.11693	0.033341	1000	0.025676	0.06802	0.6419	1.7005
BI8622	4133	4137	YKHIL	4	672.395	4.45188	0.031197	0	0	0	0	0
BI8622	4133	4137	YKHIL	4	672.395	4.68096	0.136596	10	-0.042477	0.013758	-1.06193	0.34395
BI8622	4133	4137	YKHIL	4	672.395	4.49565	0.047707	30	-0.0275	0.009478	-0.6875	0.23695
BI8622	4133	4137	YKHIL	4	672.395	4.41591	0.00442	100	-0.02304	0.012937	-0.576	0.323425
BI8622	4133	4137	YKHIL	4	672.395	4.45218	0.007379	1000	0.005402	0.049189	0.13505	1.22972
BI8626	4133	4137	YKHIL	4	672.395	4.47562	0.020208	0	0	0	0	0
BI8626	4133	4137	YKHIL	4	672.395	4.60741	0.037882	10	0.011744	0.02853	0.2936	0.71325
BI8626	4133	4137	YKHIL	4	672.395	4.54268	0.018511	30	-0.016184	0.042723	-0.4046	1.06807
BI8626	4133	4137	YKHIL	4	672.395	4.46906	0	100	-0.013305	0.016289	-0.332625	0.407225
BI8626	4133	4137	YKHIL	4	672.395	4.46191	0.015687	1000	-0.037412	0.016511	-0.9353	0.412775
Apo	4133	4137	YKHIL	4	672.395	4.42595	0.023703	0	0	0	0	0
Apo	4133	4137	YKHIL	4	672.395	4.52574	0.083762	10	0.025617	0.028438	0.640425	0.71095
Apo	4133	4137	YKHIL	4	672.395	4.62001	0.021761	30	-0.024371	0.031957	-0.609275	0.798925
Apo	4133	4137	YKHIL	4	672.395	4.4514	0	100	-0.040706	0.004764	-1.01765	0.1191
Apo	4133	4137	YKHIL	4	672.395	4.48074	0.029649	1000	0.036566	0.037436	0.91415	0.9359
BI8622	4133	4138	YKHILG	5	729.417	4.34247	0.031321	0	0	0	0	0
BI8622	4133	4138	YKHILG	5	729.417	4.57853	0.128047	10	0.088971	0.059533	1.77942	1.19066
BI8622	4133	4138	YKHILG	5	729.417	4.38495	0.046867	30	0.094234	0.021777	1.88468	0.43554
BI8622	4133	4138	YKHILG	5	729.417	4.30438	0.006068	100	0.225688	0.010997	4.51376	0.21994
BI8622	4133	4138	YKHILG	5	729.417	4.34167	0.011728	1000	0.542098	0.023589	10.842	0.47178
BI8626	4133	4138	YKHILG	5	729.417	4.36433	0.015641	0	0	0	0	0
BI8626	4133	4138	YKHILG	5	729.417	4.501	0.039192	10	0.098864	0.068824	1.97728	1.37648
BI8626	4133	4138	YKHILG	5	729.417	4.43153	0.019037	30	0.125258	0.02575	2.50516	0.515
BI8626	4133	4138	YKHILG	5	729.417	4.35431	0	100	0.212703	0.007237	4.25406	0.14474
BI8626	4133	4138	YKHILG	5	729.417	4.34321	0.013031	1000	0.525625	0.01246	10.5125	0.2492
Apo	4133	4138	YKHILG	5	729.417	4.31523	0.020591	0	0	0	0	0
Apo	4133	4138	YKHILG	5	729.417	4.36271	0.005175	10	0.097683	0.0053	1.95366	0.106
Apo	4133	4138	YKHILG	5	729.417	4.51875	0.030139	30	0.112212	0.017335	2.24424	0.3467
Apo	4133	4138	YKHILG	5	729.417	4.33813	0	100	0.162043	0.002356	3.24086	0.04712
Apo	4133	4138	YKHILG	5	729.417	4.36085	0.031992	1000	0.521725	0.027138	10.4345	0.54276
BI8622	4133	4139	YKHILGK	6	857.512	4.01981	0.021764	0	0	0	0	0
BI8622	4133	4139	YKHILGK	6	857.512	4.27224	0.12724	10	0.079878	0.044456	1.3313	0.740933
BI8622	4133	4139	YKHILGK	6	857.512	4.06331	0.050206	30	0.1393	0.029643	2.32167	0.49405
BI8622	4133	4139	YKHILGK	6	857.512	3.81067	0.020285	100	0.23437	0.020904	3.90617	0.3484
BI8622	4133	4139	YKHILGK	6	857.512	4.02706	0.010243	1000	0.762046	0.02893	12.7008	0.482167
BI8626	4133	4139	YKHILGK	6	857.512	4.04736	0.014552	0	0	0	0	0
BI8626	4133	4139	YKHILGK	6	857.512	4.21096	0.039253	10	0.08947	0.032146	1.49117	0.535767
BI8626	4133	4139	YKHILGK	6	857.512	4.12173	0.025534	30	0.119807	0.034866	1.99678	0.5811
BI8626	4133	4139	YKHILGK	6	857.512	3.97135	0	100	0.205016	0.030649	3.41693	0.510817
BI8626	4133	4139	YKHILGK	6	857.512	4.02214	0.023715	1000	0.768175	0.034245	12.8029	0.57075
Apo	4133	4139	YKHILGK	6	857.512	3.99074	0.020268	0	0	0	0	0
Apo	4133	4139	YKHILGK	6	857.512	4.09902	0.091924	10	0.09522	0.046558	1.587	0.775967
Apo	4133	4139	YKHILGK	6	857.512	4.2092	0.037176	30	0.091697	0.037618	1.52828	0.626967
Apo	4133	4139	YKHILGK	6	857.512	3.93982	0	100	0.172863	0.03073	2.88105	0.512167
Apo	4133	4139	YKHILGK	6	857.512	4.05833	0.033264	1000	0.719697	0.042223	11.9949	0.703717
BI8622	4133	4146	YKHILGKSVRYTDM	13	1709.89	4.4428	0.032751	0	0	0	0	0
BI8622	4133	4146	YKHILGKSVRYTDM	13	1709.89	4.72456	0.149056	10	2.83603	0.141401	21.8156	1.0877
BI8622	4133	4146	YKHILGKSVRYTDM	13	1709.89	4.52962	0.027977	30	2.87069	0.06509	22.0823	0.500692
BI8622	4133	4146	YKHILGKSVRYTDM	13	1709.89	4.39669	0.003204	100	3.27881	0.059658	25.2216	0.458908
BI8622	4133	4146	YKHILGKSVRYTDM	13	1709.89	4.43575	0.003707	1000	4.09818	0.084603	31.5244	0.650792
BI8626	4133	4146	YKHILGKSVRYTDM	13	1709.89	4.43869	0.024306	0	0	0	0	0
BI8626	4133	4146	YKHILGKSVRYTDM	13	1709.89	4.57049	0.03523	10	3.0371	0.208592	23.3623	1.60455
BI8626	4133	4146	YKHILGKSVRYTDM	13	1709.89	4.54217	0.012127	30	3.04669	0.252196	23.4361	1.93997
BI8626	4133	4146	YKHILGKSVRYTDM	13	1709.89	4.43824	0	100	3.30815	0.08606	25.4473	0.662
BI8626	4133	4146	YKHILGKSVRYTDM	13	1709.89	4.47177	0	1000	4.20749	0.08606	32.3653	0.662
Apo	4133	4146	YKHILGKSVRYTDM	13	1709.89	4.42904	0.014417	0	0	0	0	0
Apo	4133	4146	YKHILGKSVRYTDM	13	1709.89	4.51619	0.085873	10	3.16626	0.142935	24.3558	1.0995
Apo	4133	4146	YKHILGKSVRYTDM	13	1709.89	4.57661	0.011426	30	3.26732	0.174072	25.1332	1.33902
Apo	4133	4146	YKHILGKSVRYTDM	13	1709.89	4.43452	0	100	3.31553	0.127872	25.5041	0.983631
Apo	4133	4146	YKHILGKSVRYTDM	13	1709.89	4.47911	0.009593	1000	4.21217	0.211495	32.4013	1.62688
BI8622	4146	4151	MESEDY	5	772.258	4.65634	0.043958	0	0	0	0	0
BI8622	4146	4151	MESEDY	5	772.258	4.87714	0.0758	10	1.35134	0.131198	27.0268	2.62396
BI8622	4146	4151	MESEDY	5	772.258	4.70092	0.039858	30	1.58694	0.00357	31.7387	0.0714
BI8622	4146	4151	MESEDY	5	772.258	4.62761	0.001894	100	1.59941	0.006371	31.9881	0.12742
BI8622	4146	4151	MESEDY	5	772.258	4.65574	0.005805	1000	1.83575	0.093243	36.715	1.86486
BI8626	4146	4151	MESEDY	5	772.258	4.70238	0.038332	0	0	0	0	0
BI8626	4146	4151	MESEDY	5	772.258	4.83601	0.027571	10	1.30145	0.042292	26.029	0.84584
BI8626	4146	4151	MESEDY	5	772.258	4.74601	0.007941	30	1.51345	0.054761	30.269	1.09522
BI8626	4146	4151	MESEDY	5	772.258	5.05233	0	100	1.62771	0.017523	32.5542	0.35046
BI8626	4146	4151	MESEDY	5	772.258	4.68593	0.054273	1000	2.00757	0.056035	40.1514	1.1207
Apo	4146	4151	MESEDY	5	772.258	4.62274	0.033138	0	0	0	0	0
Apo	4146	4151	MESEDY	5	772.258	4.72051	0.069174	10	1.21286	0.027136	24.2572	0.54272
Apo	4146	4151	MESEDY	5	772.258	4.84912	0.022608	30	1.47281	0.045311	29.4562	0.90622
Apo	4146	4151	MESEDY	5	772.258	4.66434	0	100	1.49706	0.021809	29.9413	0.43618
Apo	4146	4151	MESEDY	5	772.258	4.6918	0.027313	1000	1.92492	0.057752	38.4985	1.15504
BI8622	4148	4151	SEDY	3	512.175	4.36699	0.026792	0	0	0	0	0
BI8622	4148	4151	SEDY	3	512.175	4.59878	0.129871	10	0.044448	0.023341	1.4816	0.778033
BI8622	4148	4151	SEDY	3	512.175	4.40946	0.043596	30	0.049669	0.007341	1.65563	0.2447
BI8622	4148	4151	SEDY	3	512.175	4.31679	0.004325	100	0.066904	0.005806	2.23013	0.193533
BI8622	4148	4151	SEDY	3	512.175	4.36437	0.005174	1000	0.085209	0.004662	2.8403	0.1554
BI8626	4148	4151	SEDY	3	512.175	4.39398	0.021264	0	0	0	0	0
BI8626	4148	4151	SEDY	3	512.175	4.53731	0.037252	10	0.086725	0.019828	2.89083	0.660933
BI8626	4148	4151	SEDY	3	512.175	4.45724	0.014162	30	0.073106	0.015524	2.43687	0.517467
BI8626	4148	4151	SEDY	3	512.175	4.36365	0	100	0.081779	0.010038	2.72597	0.3346
BI8626	4148	4151	SEDY	3	512.175	4.37603	0.015539	1000	0.067005	0.014445	2.2335	0.4815
Apo	4148	4151	SEDY	3	512.175	4.34183	0.018802	0	0	0	0	0
Apo	4148	4151	SEDY	3	512.175	4.43345	0.083409	10	0.053177	0.023886	1.77257	0.7962
Apo	4148	4151	SEDY	3	512.175	4.55062	0.032464	30	0.037803	0.018296	1.2601	0.609867
Apo	4148	4151	SEDY	3	512.175	4.35419	0	100	0.032501	0.016119	1.08337	0.5373
Apo	4148	4151	SEDY	3	512.175	4.39173	0.028369	1000	0.041605	0.017201	1.38683	0.573367
BI8622	4149	4154	EDYHFY	5	872.334	5.08884	0.089421	0	0	0	0	0
BI8622	4149	4154	EDYHFY	5	872.334	5.30657	0.130678	10	0.897625	0.067317	17.9525	1.34634
BI8622	4149	4154	EDYHFY	5	872.334	5.17229	0.041466	30	0.933819	0.016119	18.6764	0.32238
BI8622	4149	4154	EDYHFY	5	872.334	5.11741	0.002468	100	0.949523	0.015052	18.9905	0.30104
BI8622	4149	4154	EDYHFY	5	872.334	5.12875	0.003677	1000	0.989693	0.026236	19.7939	0.52472
BI8626	4149	4154	EDYHFY	5	872.334	5.13683	0.092555	0	0	0	0	0
BI8626	4149	4154	EDYHFY	5	872.334	5.25525	0.028704	10	0.874202	0.068539	17.484	1.37078
BI8626	4149	4154	EDYHFY	5	872.334	5.19396	0.007782	30	0.954728	0.042278	19.0946	0.84556
BI8626	4149	4154	EDYHFY	5	872.334	5.14159	0	100	0.908526	0.038437	18.1705	0.76874
BI8626	4149	4154	EDYHFY	5	872.334	5.16222	0.001143	1000	0.954587	0.050089	19.0917	1.00178
Apo	4149	4154	EDYHFY	5	872.334	5.03682	0.086993	0	0	0	0	0
Apo	4149	4154	EDYHFY	5	872.334	5.19235	0.066267	10	0.871293	0.035417	17.4259	0.70834
Apo	4149	4154	EDYHFY	5	872.334	5.27016	0.015659	30	0.946213	0.036745	18.9243	0.7349
Apo	4149	4154	EDYHFY	5	872.334	5.13524	0	100	0.952756	0.02539	19.0551	0.5078
Apo	4149	4154	EDYHFY	5	872.334	5.15722	0.016037	1000	0.998853	0.076988	19.9771	1.53976
BI8622	4150	4154	DYHFY	4	743.291	5.13444	0.096629	0	0	0	0	0
BI8622	4150	4154	DYHFY	4	743.291	5.37385	0.121153	10	0.664362	0.019856	16.609	0.4964
BI8622	4150	4154	DYHFY	4	743.291	5.22932	0.042641	30	0.77777	0.008035	19.4443	0.200875
BI8622	4150	4154	DYHFY	4	743.291	5.17585	0.000351	100	0.751017	0.011894	18.7754	0.29735
BI8622	4150	4154	DYHFY	4	743.291	5.18972	0.004449	1000	0.78459	0.035933	19.6148	0.898325
BI8626	4150	4154	DYHFY	4	743.291	5.19998	0.099627	0	0	0	0	0
BI8626	4150	4154	DYHFY	4	743.291	5.30666	0.030606	10	0.654674	0.042963	16.3668	1.07408
BI8626	4150	4154	DYHFY	4	743.291	5.25426	0.007002	30	0.756385	0.046331	18.9096	1.15827
BI8626	4150	4154	DYHFY	4	743.291	5.20318	0	100	0.726483	0.040129	18.1621	1.00323
BI8626	4150	4154	DYHFY	4	743.291	5.22417	0.00455	1000	0.715087	0.041364	17.8772	1.0341
Apo	4150	4154	DYHFY	4	743.291	5.08111	0.093772	0	0	0	0	0
Apo	4150	4154	DYHFY	4	743.291	5.2367	0.057734	10	0.694287	0.054873	17.3572	1.37182
Apo	4150	4154	DYHFY	4	743.291	5.32301	0.019134	30	0.76541	0.050137	19.1352	1.25343
Apo	4150	4154	DYHFY	4	743.291	5.19442	0	100	0.779513	0.049573	19.4878	1.23933
Apo	4150	4154	DYHFY	4	743.291	5.21486	0.012809	1000	0.78767	0.071417	19.6917	1.78542
BI8622	4151	4154	YHFY	3	628.264	4.96952	0.074704	0	0	0	0	0
BI8622	4151	4154	YHFY	3	628.264	5.21183	0.12796	10	0.224089	0.031218	7.46963	1.0406
BI8622	4151	4154	YHFY	3	628.264	5.05145	0.046285	30	0.308455	0.009197	10.2818	0.306567
BI8622	4151	4154	YHFY	3	628.264	4.99307	0.0006	100	0.294761	0.024894	9.82537	0.8298
BI8622	4151	4154	YHFY	3	628.264	5.00983	0.004792	1000	0.286489	0.035061	9.54963	1.1687
BI8626	4151	4154	YHFY	3	628.264	5.0265	0.077536	0	0	0	0	0
BI8626	4151	4154	YHFY	3	628.264	5.14977	0.031721	10	0.210934	0.019985	7.03113	0.666167
BI8626	4151	4154	YHFY	3	628.264	5.08283	0.01109	30	0.271312	0.02266	9.04373	0.755333
BI8626	4151	4154	YHFY	3	628.264	5.0301	0	100	0.297102	0.019884	9.9034	0.6628
BI8626	4151	4154	YHFY	3	628.264	5.03654	0.00257	1000	0.269145	0.028319	8.9715	0.943967
Apo	4151	4154	YHFY	3	628.264	4.935	0.071192	0	0	0	0	0
Apo	4151	4154	YHFY	3	628.264	5.07149	0.071457	10	0.227812	0.068697	7.59373	2.2899
Apo	4151	4154	YHFY	3	628.264	5.15531	0.016585	30	0.281174	0.026013	9.37247	0.8671
Apo	4151	4154	YHFY	3	628.264	5.01444	0	100	0.287764	0.004314	9.59213	0.1438
Apo	4151	4154	YHFY	3	628.264	5.03239	0.022154	1000	0.345089	0.035306	11.503	1.17687
BI8622	4152	4155	HFYQ	3	593.259	4.34067	0.028863	0	0	0	0	0
BI8622	4152	4155	HFYQ	3	593.259	4.57447	0.125776	10	-0.032687	0.045234	-1.08957	1.5078
BI8622	4152	4155	HFYQ	3	593.259	4.38218	0.045768	30	-0.021021	0.021311	-0.7007	0.710367
BI8622	4152	4155	HFYQ	3	593.259	4.29875	0.00404	100	-0.058275	0.015104	-1.9425	0.503467
BI8622	4152	4155	HFYQ	3	593.259	4.33777	0.007975	1000	0.059118	0.049445	1.9706	1.64817
BI8626	4152	4155	HFYQ	3	593.259	4.36071	0.016916	0	0	0	0	0
BI8626	4152	4155	HFYQ	3	593.259	4.49939	0.042156	10	-0.008579	0.044773	-0.285967	1.49243
BI8626	4152	4155	HFYQ	3	593.259	4.41745	0.005339	30	0.024797	0.03528	0.826567	1.176
BI8626	4152	4155	HFYQ	3	593.259	4.3509	0	100	-0.049102	0.033574	-1.63673	1.11913
BI8626	4152	4155	HFYQ	3	593.259	4.34073	0.017777	1000	0.057517	0.033848	1.91723	1.12827
Apo	4152	4155	HFYQ	3	593.259	4.30991	0.021414	0	0	0	0	0
Apo	4152	4155	HFYQ	3	593.259	4.41216	0.084832	10	-0.046653	0.021401	-1.5551	0.713367
Apo	4152	4155	HFYQ	3	593.259	4.54518	0	30	0.012636	0.009997	0.4212	0.333233
Apo	4152	4155	HFYQ	3	593.259	4.33292	0	100	-0.076024	0.009997	-2.53413	0.333233
Apo	4152	4155	HFYQ	3	593.259	4.36579	0.031536	1000	0.018509	0.0227	0.616967	0.756667
BI8622	4153	4157	FYQGL	4	626.306	5.27189	0.109277	0	0	0	0	0
BI8622	4153	4157	FYQGL	4	626.306	5.45857	0.057546	10	0.090623	0.014529	2.26557	0.363225
BI8622	4153	4157	FYQGL	4	626.306	5.38393	0.043207	30	0.171101	0.026716	4.27752	0.6679
BI8622	4153	4157	FYQGL	4	626.306	5.32624	0.006518	100	0.304948	0.010003	7.6237	0.250075
BI8622	4153	4157	FYQGL	4	626.306	5.3432	0.001522	1000	0.855016	0.082482	21.3754	2.06205
BI8626	4153	4157	FYQGL	4	626.306	5.32798	0.117268	0	0	0	0	0
BI8626	4153	4157	FYQGL	4	626.306	5.43431	0.02418	10	0.128667	0.035323	3.21667	0.883075
BI8626	4153	4157	FYQGL	4	626.306	5.39726	0.004191	30	0.134416	0.016073	3.3604	0.401825
BI8626	4153	4157	FYQGL	4	626.306	5.34756	0	100	0.196247	0.015271	4.90618	0.381775
BI8626	4153	4157	FYQGL	4	626.306	5.38517	0.010058	1000	0.745003	0.055642	18.6251	1.39105
Apo	4153	4157	FYQGL	4	626.306	5.19262	0.108072	0	0	0	0	0
Apo	4153	4157	FYQGL	4	626.306	5.33774	0.04146	10	0.124533	0.017333	3.11333	0.433325
Apo	4153	4157	FYQGL	4	626.306	5.46122	0.013025	30	0.112342	0.020492	2.80855	0.5123
Apo	4153	4157	FYQGL	4	626.306	5.34265	0	100	0.282296	0.011978	7.0574	0.29945
Apo	4153	4157	FYQGL	4	626.306	5.36996	0.016304	1000	0.841437	0.077365	21.0359	1.93413
BI8622	4155	4159	QGLVY	4	578.306	4.93866	0.144633	0	0	0	0	0
BI8622	4155	4159	QGLVY	4	578.306	5.20499	0.173685	10	0.038916	0.075571	0.9729	1.88928
BI8622	4155	4159	QGLVY	4	578.306	5.04185	0.176728	30	0.068877	0.099155	1.72192	2.47887
BI8622	4155	4159	QGLVY	4	578.306	4.86908	0.000404	100	0.163911	0.063375	4.09778	1.58438
BI8622	4155	4159	QGLVY	4	578.306	4.89219	0.00493	1000	0.25724	0.061913	6.431	1.54783
BI8626	4155	4159	QGLVY	4	578.306	4.96237	0.15279	0	0	0	0	0
BI8626	4155	4159	QGLVY	4	578.306	5.07062	0.127322	10	0.0823	0.04799	2.0575	1.19975
BI8626	4155	4159	QGLVY	4	578.306	5.12423	0.12445	30	0.068437	0.047084	1.71093	1.1771
BI8626	4155	4159	QGLVY	4	578.306	4.89422	0	100	0.140806	0.027063	3.52015	0.676575
BI8626	4155	4159	QGLVY	4	578.306	4.91279	0.009037	1000	0.15268	0.027134	3.817	0.67835
Apo	4155	4159	QGLVY	4	578.306	4.8777	0.092328	0	0	0	0	0
Apo	4155	4159	QGLVY	4	578.306	4.96777	0.078902	10	0.098328	0.093038	2.4582	2.32595
Apo	4155	4159	QGLVY	4	578.306	5.04013	0.019057	30	0.112881	0.039298	2.82203	0.98245
Apo	4155	4159	QGLVY	4	578.306	4.89527	0	100	0.152815	0.038073	3.82038	0.951825
Apo	4155	4159	QGLVY	4	578.306	4.9294	0.016934	1000	0.224342	0.058599	5.60855	1.46497
BI8622	4157	4160	LVYL	3	506.31	5.535	0.142752	0	0	0	0	0
BI8622	4157	4160	LVYL	3	506.31	5.78872	0.135838	10	0.006115	0.014768	0.203833	0.492267
BI8622	4157	4160	LVYL	3	506.31	5.64999	0.040269	30	0.033349	0.015544	1.11163	0.518133
BI8622	4157	4160	LVYL	3	506.31	5.6132	0.006419	100	0.009167	0.010751	0.305567	0.358367
BI8622	4157	4160	LVYL	3	506.31	5.61487	0.005193	1000	0.082566	0.014979	2.7522	0.4993
BI8626	4157	4160	LVYL	3	506.31	5.5478	0.146971	0	0	0	0	0
BI8626	4157	4160	LVYL	3	506.31	5.69355	0.019856	10	0.012386	0.00384	0.412867	0.128
BI8626	4157	4160	LVYL	3	506.31	5.6554	0.010806	30	0.030384	0.006698	1.0128	0.223267
BI8626	4157	4160	LVYL	3	506.31	5.6313	0	100	0.008567	0.003499	0.285567	0.116633
BI8626	4157	4160	LVYL	3	506.31	5.6345	0.003603	1000	0.071162	0.006336	2.37207	0.2112
Apo	4157	4160	LVYL	3	506.31	5.41272	0.135548	0	0	0	0	0
Apo	4157	4160	LVYL	3	506.31	5.6581	0.04619	10	0.026353	0.005324	0.878433	0.177467
Apo	4157	4160	LVYL	3	506.31	5.71459	0.003997	30	0.022839	0.006694	0.7613	0.223133
Apo	4157	4160	LVYL	3	506.31	5.61328	0	100	0.0183	0.000768	0.61	0.0256
Apo	4157	4160	LVYL	3	506.31	5.64632	0.017892	1000	0.077609	0.012684	2.58697	0.4228
BI8622	4160	4163	LLEN	3	487.264	4.42766	0.028941	0	0	0	0	0
BI8622	4160	4163	LLEN	3	487.264	4.65881	0.131154	10	0.031008	0.020887	1.0336	0.696233
BI8622	4160	4163	LLEN	3	487.264	4.46764	0.042426	30	0.098995	0.037477	3.29983	1.24923
BI8622	4160	4163	LLEN	3	487.264	4.38084	0.003087	100	0.124144	0.01481	4.13813	0.493667
BI8622	4160	4163	LLEN	3	487.264	4.42197	0.007177	1000	0.633427	0.012352	21.1142	0.411733
BI8626	4160	4163	LLEN	3	487.264	4.45615	0.022723	0	0	0	0	0
BI8626	4160	4163	LLEN	3	487.264	4.59722	0.036662	10	0.026588	0.040998	0.886267	1.3666
BI8626	4160	4163	LLEN	3	487.264	4.51578	0.014102	30	0.069649	0.042875	2.32163	1.42917
BI8626	4160	4163	LLEN	3	487.264	4.42415	0	100	0.097797	0.036331	3.2599	1.21103
BI8626	4160	4163	LLEN	3	487.264	4.42989	0.007562	1000	0.616533	0.03726	20.5511	1.242
Apo	4160	4163	LLEN	3	487.264	4.39933	0.018562	0	0	0	0	0
Apo	4160	4163	LLEN	3	487.264	4.48982	0.077944	10	0.006179	0.012908	0.205967	0.430267
Apo	4160	4163	LLEN	3	487.264	4.60857	0.02937	30	0.070131	0.048141	2.3377	1.6047
Apo	4160	4163	LLEN	3	487.264	4.419	0	100	0.063685	0.009221	2.12283	0.307367
Apo	4160	4163	LLEN	3	487.264	4.44811	0.028309	1000	0.640456	0.028887	21.3485	0.9629
BI8622	4160	4164	LLEND	4	602.291	4.51546	0.036749	0	0	0	0	0
BI8622	4160	4164	LLEND	4	602.291	4.74945	0.138482	10	0.248003	0.071764	6.20008	1.7941
BI8622	4160	4164	LLEND	4	602.291	4.55607	0.041877	30	0.250208	0.053361	6.2552	1.33403
BI8622	4160	4164	LLEND	4	602.291	4.46995	0.001883	100	0.277007	0.04401	6.92518	1.10025
BI8622	4160	4164	LLEND	4	602.291	4.50611	0.007897	1000	0.790946	0.0548	19.7736	1.37
BI8626	4160	4164	LLEND	4	602.291	4.53669	0.037532	0	0	0	0	0
BI8626	4160	4164	LLEND	4	602.291	4.66785	0.043709	10	0.273307	0.089767	6.83268	2.24417
BI8626	4160	4164	LLEND	4	602.291	4.59764	0.013964	30	0.241007	0.081814	6.02517	2.04535
BI8626	4160	4164	LLEND	4	602.291	4.51088	0	100	0.273154	0.078762	6.82885	1.96905
BI8626	4160	4164	LLEND	4	602.291	4.51863	0.01315	1000	0.822418	0.095548	20.5604	2.3887
Apo	4160	4164	LLEND	4	602.291	4.48255	0.017791	0	0	0	0	0
Apo	4160	4164	LLEND	4	602.291	4.58704	0.087153	10	0.237891	0.067809	5.94727	1.69522
Apo	4160	4164	LLEND	4	602.291	4.67939	0.03838	30	0.236014	0.078826	5.90035	1.97065
Apo	4160	4164	LLEND	4	602.291	4.50551	0	100	0.296254	0.064145	7.40635	1.60362
Apo	4160	4164	LLEND	4	602.291	4.53734	0.027438	1000	0.747434	0.085988	18.6859	2.1497
BI8622	4161	4168	LENDVSTL	7	889.439	4.97972	0.084874	0	0	0	0	0
BI8622	4161	4168	LENDVSTL	7	889.439	5.26111	0.154342	10	2.81658	0.062205	40.2369	0.888643
BI8622	4161	4168	LENDVSTL	7	889.439	5.07388	0.024076	30	3.05558	0.085082	43.6511	1.21546
BI8622	4161	4168	LENDVSTL	7	889.439	4.96243	0.002959	100	3.15976	0.042056	45.1395	0.6008
BI8622	4161	4168	LENDVSTL	7	889.439	4.98316	0.0035	1000	3.22468	0.047254	46.0668	0.675057
BI8626	4161	4168	LENDVSTL	7	889.439	4.93845	0.066521	0	0	0	0	0
BI8626	4161	4168	LENDVSTL	7	889.439	5.10071	0.025816	10	2.91198	0.046118	41.5997	0.658829
BI8626	4161	4168	LENDVSTL	7	889.439	5.07194	0.0043	30	3.05639	0.137333	43.6627	1.9619
BI8626	4161	4168	LENDVSTL	7	889.439	4.98487	0	100	3.21275	0.017672	45.8964	0.252457
BI8626	4161	4168	LENDVSTL	7	889.439	5.01285	0.041416	1000	3.26238	0.023294	46.6055	0.332771
Apo	4161	4168	LENDVSTL	7	889.439	4.98724	0.211162	0	0	0	0	0
Apo	4161	4168	LENDVSTL	7	889.439	5.06767	0.078804	10	2.91285	0.044302	41.6122	0.632886
Apo	4161	4168	LENDVSTL	7	889.439	5.1243	0.008432	30	3.10996	0.029223	44.428	0.417471
Apo	4161	4168	LENDVSTL	7	889.439	4.9905	0	100	3.14025	0.022695	44.8607	0.324214
Apo	4161	4168	LENDVSTL	7	889.439	5.02672	0.004423	1000	3.26865	0.079638	46.6951	1.13769
BI8622	4165	4170	VSTLGY	5	638.327	4.94212	0.072915	0	0	0	0	0
BI8622	4165	4170	VSTLGY	5	638.327	5.1595	0.121786	10	1.91216	0.094738	38.2432	1.89476
BI8622	4165	4170	VSTLGY	5	638.327	5.00727	0.045177	30	2.29871	0.084136	45.9742	1.68272
BI8622	4165	4170	VSTLGY	5	638.327	4.93809	0.000357	100	2.33235	0.081166	46.6471	1.62332
BI8622	4165	4170	VSTLGY	5	638.327	4.95721	0.003842	1000	2.34703	0.091496	46.9407	1.82992
BI8626	4165	4170	VSTLGY	5	638.327	4.95775	0.077379	0	0	0	0	0
BI8626	4165	4170	VSTLGY	5	638.327	5.08542	0.035534	10	1.93941	0.096908	38.7883	1.93816
BI8626	4165	4170	VSTLGY	5	638.327	5.02092	0.007362	30	2.30694	0.072669	46.1387	1.45338
BI8626	4165	4170	VSTLGY	5	638.327	4.94963	0	100	2.27598	0.064974	45.5195	1.29948
BI8626	4165	4170	VSTLGY	5	638.327	4.96959	0	1000	2.28604	0.064974	45.7208	1.29948
Apo	4165	4170	VSTLGY	5	638.327	4.89153	0.058904	0	0	0	0	0
Apo	4165	4170	VSTLGY	5	638.327	5.0318	0.073949	10	1.88966	0.159363	37.7933	3.18726
Apo	4165	4170	VSTLGY	5	638.327	5.11225	0.01853	30	2.22388	0.157779	44.4776	3.15558
Apo	4165	4170	VSTLGY	5	638.327	4.96732	0	100	2.29974	0.153527	45.9947	3.07054
Apo	4165	4170	VSTLGY	5	638.327	4.9859	0.018466	1000	2.26914	0.181643	45.3828	3.63286
BI8622	4167	4170	TLGY	3	452.227	4.87194	0.064111	0	0	0	0	0
BI8622	4167	4170	TLGY	3	452.227	5.1025	0.131018	10	1.0504	0.037991	35.0132	1.26637
BI8622	4167	4170	TLGY	3	452.227	4.93318	0.044535	30	1.26098	0.013398	42.0327	0.4466
BI8622	4167	4170	TLGY	3	452.227	4.86235	0.001118	100	1.23696	0.013757	41.2319	0.458567
BI8622	4167	4170	TLGY	3	452.227	4.88252	0.005779	1000	1.24648	0.016403	41.5494	0.546767
BI8626	4167	4170	TLGY	3	452.227	4.89231	0.06502	0	0	0	0	0
BI8626	4167	4170	TLGY	3	452.227	5.02468	0.036531	10	1.01864	0.030535	33.9548	1.01783
BI8626	4167	4170	TLGY	3	452.227	4.95663	0.010858	30	1.20945	0.050609	40.3151	1.68697
BI8626	4167	4170	TLGY	3	452.227	4.88906	0	100	1.17771	0.020537	39.2569	0.684567
BI8626	4167	4170	TLGY	3	452.227	4.89859	0.00483	1000	1.29729	0.029115	43.2431	0.9705
Apo	4167	4170	TLGY	3	452.227	4.82503	0.054764	0	0	0	0	0
Apo	4167	4170	TLGY	3	452.227	4.95885	0.078551	10	1.00943	0.03375	33.6476	1.125
Apo	4167	4170	TLGY	3	452.227	5.0439	0.023265	30	1.14888	0.038112	38.2959	1.2704
Apo	4167	4170	TLGY	3	452.227	4.88943	0	100	1.21206	0.018455	40.402	0.615167
Apo	4167	4170	TLGY	3	452.227	4.91078	0.020915	1000	1.22862	0.054234	40.954	1.8078
BI8622	4170	4174	YDLTF	4	657.301	5.62452	0.155274	0	0	0	0	0
BI8622	4170	4174	YDLTF	4	657.301	5.72445	0.087075	10	0.257406	0.042021	6.43515	1.05053
BI8622	4170	4174	YDLTF	4	657.301	5.76959	0.024626	30	0.435473	0.072272	10.8868	1.8068
BI8622	4170	4174	YDLTF	4	657.301	5.68201	0.006819	100	1.01926	0.019288	25.4814	0.4822
BI8622	4170	4174	YDLTF	4	657.301	5.68242	0.002056	1000	1.58637	0.019804	39.6593	0.4951
BI8626	4170	4174	YDLTF	4	657.301	5.46779	0.130846	0	0	0	0	0
BI8626	4170	4174	YDLTF	4	657.301	5.74725	0.017552	10	0.293728	0.015295	7.3432	0.382375
BI8626	4170	4174	YDLTF	4	657.301	5.73001	0.001611	30	0.431442	0.025645	10.786	0.641125
BI8626	4170	4174	YDLTF	4	657.301	5.6941	0	100	0.961705	0.015241	24.0426	0.381025
BI8626	4170	4174	YDLTF	4	657.301	5.66188	0.096245	1000	1.6082	0.0175	40.2051	0.4375
Apo	4170	4174	YDLTF	4	657.301	5.35137	0.048183	0	0	0	0	0
Apo	4170	4174	YDLTF	4	657.301	5.72954	0.044439	10	0.295007	0.033392	7.37518	0.8348
Apo	4170	4174	YDLTF	4	657.301	5.77369	0.003286	30	0.460879	0.038598	11.522	0.96495
Apo	4170	4174	YDLTF	4	657.301	5.68529	0	100	0.965495	0.030711	24.1374	0.767775
Apo	4170	4174	YDLTF	4	657.301	5.72002	0.005036	1000	1.5836	0.043291	39.5901	1.08228
BI8622	4171	4174	DLTF	3	494.237	5.48076	0.136469	0	0	0	0	0
BI8622	4171	4174	DLTF	3	494.237	5.7201	0.132596	10	0.122942	0.009189	4.09807	0.3063
BI8622	4171	4174	DLTF	3	494.237	5.59243	0.042339	30	0.237231	0.007161	7.9077	0.2387
BI8622	4171	4174	DLTF	3	494.237	5.53158	0.007758	100	0.409157	0.015478	13.6386	0.515933
BI8622	4171	4174	DLTF	3	494.237	5.53345	0.001579	1000	0.587938	0.007351	19.5979	0.245033
BI8626	4171	4174	DLTF	3	494.237	5.50733	0.142767	0	0	0	0	0
BI8626	4171	4174	DLTF	3	494.237	5.62844	0.02422	10	0.103133	0.028517	3.43777	0.950567
BI8626	4171	4174	DLTF	3	494.237	5.59265	0.006295	30	0.217041	0.022744	7.2347	0.758133
BI8626	4171	4174	DLTF	3	494.237	5.54399	0	100	0.402359	0.015829	13.412	0.527633
BI8626	4171	4174	DLTF	3	494.237	5.57404	0.014453	1000	0.559238	0.015839	18.6413	0.527967
Apo	4171	4174	DLTF	3	494.237	5.38969	0.137689	0	0	0	0	0
Apo	4171	4174	DLTF	3	494.237	5.59729	0.049498	10	0.087743	0.018134	2.92477	0.604467
Apo	4171	4174	DLTF	3	494.237	5.65607	0.010826	30	0.200542	0.022978	6.68473	0.765933
Apo	4171	4174	DLTF	3	494.237	5.54101	0	100	0.414711	0.006384	13.8237	0.2128
Apo	4171	4174	DLTF	3	494.237	5.56382	0.00965	1000	0.554891	0.022158	18.4964	0.7386
BI8622	4171	4177	DLTFSTE	6	811.359	5.14411	0.097722	0	0	0	0	0
BI8622	4171	4177	DLTFSTE	6	811.359	5.38552	0.122469	10	0.732153	0.088538	12.2026	1.47563
BI8622	4171	4177	DLTFSTE	6	811.359	5.24042	0.03955	30	0.980542	0.022842	16.3424	0.3807
BI8622	4171	4177	DLTFSTE	6	811.359	5.18139	0.001593	100	1.28188	0.028152	21.3646	0.4692
BI8622	4171	4177	DLTFSTE	6	811.359	5.19369	0.002203	1000	1.7705	0.027493	29.5084	0.458217
BI8626	4171	4177	DLTFSTE	6	811.359	5.19703	0.103736	0	0	0	0	0
BI8626	4171	4177	DLTFSTE	6	811.359	5.31242	0.032111	10	0.783325	0.046654	13.0554	0.777567
BI8626	4171	4177	DLTFSTE	6	811.359	5.26271	0.005082	30	0.934472	0.032742	15.5745	0.5457
BI8626	4171	4177	DLTFSTE	6	811.359	5.20001	0	100	1.27172	0.031847	21.1954	0.530783
BI8626	4171	4177	DLTFSTE	6	811.359	5.23071	0.002765	1000	1.74834	0.043642	29.139	0.727367
Apo	4171	4177	DLTFSTE	6	811.359	5.08935	0.089836	0	0	0	0	0
Apo	4171	4177	DLTFSTE	6	811.359	5.21177	0.000168	10	0.812046	0.03166	13.5341	0.527667
Apo	4171	4177	DLTFSTE	6	811.359	5.33237	0.02135	30	0.935327	0.038348	15.5888	0.639133
Apo	4171	4177	DLTFSTE	6	811.359	5.19971	0	100	1.24633	0.027024	20.7722	0.4504
Apo	4171	4177	DLTFSTE	6	811.359	5.22321	0.011383	1000	1.78556	0.051381	29.7593	0.85635
BI8622	4173	4177	TFSTE	4	583.248	4.4959	0.034162	0	0	0	0	0
BI8622	4173	4177	TFSTE	4	583.248	4.72959	0.121085	10	0.757122	0.02556	18.928	0.639
BI8622	4173	4177	TFSTE	4	583.248	4.5391	0.042453	30	0.728991	0.077174	18.2248	1.92935
BI8622	4173	4177	TFSTE	4	583.248	4.45601	0.002002	100	0.925563	0.047003	23.1391	1.17508
BI8622	4173	4177	TFSTE	4	583.248	4.49229	0.007037	1000	1.5509	0.028213	38.7725	0.705325
BI8626	4173	4177	TFSTE	4	583.248	4.52333	0.029973	0	0	0	0	0
BI8626	4173	4177	TFSTE	4	583.248	4.66416	0.037395	10	0.758744	0.053765	18.9686	1.34413
BI8626	4173	4177	TFSTE	4	583.248	4.58189	0.013161	30	0.781656	0.0418	19.5414	1.045
BI8626	4173	4177	TFSTE	4	583.248	4.50007	0	100	0.998112	0.041123	24.9528	1.02808
BI8626	4173	4177	TFSTE	4	583.248	4.50086	0.007123	1000	1.507	0.043841	37.6751	1.09603
Apo	4173	4177	TFSTE	4	583.248	4.46773	0.021016	0	0	0	0	0
Apo	4173	4177	TFSTE	4	583.248	4.56447	0.083072	10	0.743755	0.042376	18.5939	1.0594
Apo	4173	4177	TFSTE	4	583.248	4.67729	0.038406	30	0.758049	0.041598	18.9512	1.03995
Apo	4173	4177	TFSTE	4	583.248	4.49157	0	100	0.866934	0.041127	21.6733	1.02817
Apo	4173	4177	TFSTE	4	583.248	4.51864	0.028428	1000	1.52684	0.045818	38.171	1.14545
BI8622	4178	4185	VQEFGVCE	7	909.39	5.16348	0.100706	0	0	0	0	0
BI8622	4178	4185	VQEFGVCE	7	909.39	5.47649	0.14147	10	3.17972	0.052208	45.4246	0.745829
BI8622	4178	4185	VQEFGVCE	7	909.39	5.25821	0.038494	30	3.74711	0.173261	53.5301	2.47516
BI8622	4178	4185	VQEFGVCE	7	909.39	5.18545	0.002355	100	3.97659	0.033304	56.8085	0.475771
BI8622	4178	4185	VQEFGVCE	7	909.39	5.1988	0.003662	1000	3.97376	0.024113	56.768	0.344471
BI8626	4178	4185	VQEFGVCE	7	909.39	5.14482	0.102065	0	0	0	0	0
BI8626	4178	4185	VQEFGVCE	7	909.39	5.28858	0.022206	10	3.27508	0.03146	46.7869	0.449429
BI8626	4178	4185	VQEFGVCE	7	909.39	5.26761	0.003474	30	3.69234	0.039895	52.7478	0.569929
BI8626	4178	4185	VQEFGVCE	7	909.39	5.2063	0	100	4.1334	0.019686	59.0486	0.281229
BI8626	4178	4185	VQEFGVCE	7	909.39	5.2164	0.003804	1000	4.08535	0.022511	58.3622	0.321586
Apo	4178	4185	VQEFGVCE	7	909.39	5.07053	0.078397	0	0	0	0	0
Apo	4178	4185	VQEFGVCE	7	909.39	5.2534	0.06441	10	3.2627	0.018097	46.61	0.258529
Apo	4178	4185	VQEFGVCE	7	909.39	5.31444	0.014824	30	3.76564	0.057837	53.7949	0.826243
Apo	4178	4185	VQEFGVCE	7	909.39	5.20186	0	100	3.97767	0.014345	56.8238	0.204929
Apo	4178	4185	VQEFGVCE	7	909.39	5.23839	0.005537	1000	4.04971	0.100122	57.8531	1.43031
BI8622	4181	4184	FGVC	3	424.178	5.12293	0.095965	0	0	0	0	0
BI8622	4181	4184	FGVC	3	424.178	5.41087	0.154209	10	1.20468	0.033422	40.1559	1.11407
BI8622	4181	4184	FGVC	3	424.178	5.22521	0.042576	30	1.27205	0.033977	42.4015	1.13257
BI8622	4181	4184	FGVC	3	424.178	5.14736	0.00212	100	1.50983	0.032518	50.3275	1.08393
BI8622	4181	4184	FGVC	3	424.178	5.16537	0.004751	1000	1.47469	0.048321	49.1564	1.6107
BI8626	4181	4184	FGVC	3	424.178	5.12912	0.102105	0	0	0	0	0
BI8626	4181	4184	FGVC	3	424.178	5.26567	0.028142	10	1.18088	0.069803	39.3628	2.32677
BI8626	4181	4184	FGVC	3	424.178	5.22997	0.009347	30	1.31157	0.064697	43.719	2.15657
BI8626	4181	4184	FGVC	3	424.178	5.16973	0	100	1.51195	0.025599	50.3984	0.8533
BI8626	4181	4184	FGVC	3	424.178	5.18507	0.001354	1000	1.47886	0.070861	49.2952	2.36203
Apo	4181	4184	FGVC	3	424.178	5.05366	0.088651	0	0	0	0	0
Apo	4181	4184	FGVC	3	424.178	5.17772	0.000676	10	1.21756	0.044791	40.5852	1.49303
Apo	4181	4184	FGVC	3	424.178	5.28883	0.016193	30	1.34833	0.051279	44.9444	1.7093
Apo	4181	4184	FGVC	3	424.178	5.16391	0	100	1.45145	0.024288	48.3815	0.8096
Apo	4181	4184	FGVC	3	424.178	5.19995	0.014569	1000	1.47393	0.078727	49.1309	2.62423
BI8622	4185	4197	EVRDLKPNGANIL	11	1437.79	4.76316	0.057794	0	0	0	0	0
BI8622	4185	4197	EVRDLKPNGANIL	11	1437.79	5.05045	0.156437	10	1.4115	0.087828	12.8318	0.798436
BI8622	4185	4197	EVRDLKPNGANIL	11	1437.79	4.85051	0.031055	30	1.80764	0.104122	16.4331	0.946564
BI8622	4185	4197	EVRDLKPNGANIL	11	1437.79	4.74781	0.001647	100	3.112	0.049533	28.2909	0.4503
BI8622	4185	4197	EVRDLKPNGANIL	11	1437.79	4.76955	0.008345	1000	4.93841	0.056826	44.8947	0.5166
BI8626	4185	4197	EVRDLKPNGANIL	11	1437.79	4.74503	0.041014	0	0	0	0	0
BI8626	4185	4197	EVRDLKPNGANIL	11	1437.79	4.89288	0.028709	10	1.52025	0.128374	13.8204	1.16704
BI8626	4185	4197	EVRDLKPNGANIL	11	1437.79	4.86457	0.010148	30	1.89508	0.192301	17.228	1.74819
BI8626	4185	4197	EVRDLKPNGANIL	11	1437.79	4.77837	0	100	3.14334	0.065327	28.5758	0.593882
BI8626	4185	4197	EVRDLKPNGANIL	11	1437.79	4.80442	0	1000	5.00656	0.065327	45.5142	0.593882
Apo	4185	4197	EVRDLKPNGANIL	11	1437.79	4.70513	0.019886	0	0	0	0	0
Apo	4185	4197	EVRDLKPNGANIL	11	1437.79	4.849	0.08563	10	1.62108	0.083558	14.7371	0.759618
Apo	4185	4197	EVRDLKPNGANIL	11	1437.79	4.90687	0.011629	30	2.10984	0.100215	19.1803	0.911045
Apo	4185	4197	EVRDLKPNGANIL	11	1437.79	4.77272	0	100	3.10346	0.071386	28.2133	0.648964
Apo	4185	4197	EVRDLKPNGANIL	11	1437.79	4.81006	0.006632	1000	5.06305	0.193241	46.0277	1.75674
BI8622	4186	4194	VRDLKPNGA	7	968.54	3.89867	0.011366	0	0	0	0	0
BI8622	4186	4194	VRDLKPNGA	7	968.54	4.17966	0.120873	10	1.11346	0.118589	15.9066	1.69413
BI8622	4186	4194	VRDLKPNGA	7	968.54	3.91551	0.041865	30	1.47137	0.012691	21.0196	0.1813
BI8622	4186	4194	VRDLKPNGA	7	968.54	3.74364	0.010752	100	1.74046	0.025137	24.8638	0.3591
BI8622	4186	4194	VRDLKPNGA	7	968.54	3.90436	0.012601	1000	2.58388	0.123279	36.9126	1.76113
BI8626	4186	4194	VRDLKPNGA	7	968.54	3.91926	0.017611	0	0	0	0	0
BI8626	4186	4194	VRDLKPNGA	7	968.54	4.08138	0.038367	10	1.13365	0.089959	16.195	1.28513
BI8626	4186	4194	VRDLKPNGA	7	968.54	3.99003	0.02741	30	1.40464	0.07095	20.0663	1.01357
BI8626	4186	4194	VRDLKPNGA	7	968.54	3.80328	0	100	1.6921	0.043142	24.1729	0.616314
BI8626	4186	4194	VRDLKPNGA	7	968.54	3.90216	0.03317	1000	2.6135	0.212959	37.3358	3.04227
Apo	4186	4194	VRDLKPNGA	7	968.54	3.86062	0.019255	0	0	0	0	0
Apo	4186	4194	VRDLKPNGA	7	968.54	3.97453	0.099485	10	1.10325	0.034025	15.7608	0.486071
Apo	4186	4194	VRDLKPNGA	7	968.54	4.09748	0.037503	30	1.30978	0.071563	18.7112	1.02233
Apo	4186	4194	VRDLKPNGA	7	968.54	3.80719	0	100	1.84568	0.020364	26.3668	0.290914
Apo	4186	4194	VRDLKPNGA	7	968.54	3.93285	0.032619	1000	2.53419	0.133644	36.2028	1.9092
BI8622	4186	4197	VRDLKPNGANIL	10	1308.75	4.68808	0.0518	0	0	0	0	0
BI8622	4186	4197	VRDLKPNGANIL	10	1308.75	4.97032	0.151126	10	1.2467	0.112416	12.467	1.12416
BI8622	4186	4197	VRDLKPNGANIL	10	1308.75	4.74423	0.037028	30	1.83985	0.089697	18.3985	0.89697
BI8622	4186	4197	VRDLKPNGANIL	10	1308.75	4.67094	0.001756	100	2.5818	0.03921	25.818	0.3921
BI8622	4186	4197	VRDLKPNGANIL	10	1308.75	4.70537	0.009246	1000	4.184	0.016902	41.84	0.16902
BI8626	4186	4197	VRDLKPNGANIL	10	1308.75	4.70573	0.046918	0	0	0	0	0
BI8626	4186	4197	VRDLKPNGANIL	10	1308.75	4.83063	0.032176	10	1.32351	0.024415	13.2351	0.24415
BI8626	4186	4197	VRDLKPNGANIL	10	1308.75	4.78667	0.014141	30	1.71046	0.019083	17.1046	0.19083
BI8626	4186	4197	VRDLKPNGANIL	10	1308.75	4.7171	0	100	2.64228	0.009262	26.4228	0.09262
BI8626	4186	4197	VRDLKPNGANIL	10	1308.75	4.73172	0.008854	1000	4.25981	0.043062	42.5981	0.43062
Apo	4186	4197	VRDLKPNGANIL	10	1308.75	4.64447	0.033393	0	0	0	0	0
Apo	4186	4197	VRDLKPNGANIL	10	1308.75	4.77724	0.078232	10	1.33871	0.045586	13.3871	0.45586
Apo	4186	4197	VRDLKPNGANIL	10	1308.75	4.84762	0.021301	30	1.68325	0.02913	16.8325	0.2913
Apo	4186	4197	VRDLKPNGANIL	10	1308.75	4.7122	0	100	2.54188	0.005374	25.4188	0.05374
Apo	4186	4197	VRDLKPNGANIL	10	1308.75	4.73949	0.012092	1000	4.20813	0.054013	42.0813	0.54013
BI8622	4188	4197	DLKPNGANIL	8	1053.58	4.9775	0.078053	0	0	0	0	0
BI8622	4188	4197	DLKPNGANIL	8	1053.58	5.19276	0.127017	10	1.18385	0.098994	14.7981	1.23742
BI8622	4188	4197	DLKPNGANIL	8	1053.58	5.04909	0.043232	30	1.65678	0.016779	20.7098	0.209737
BI8622	4188	4197	DLKPNGANIL	8	1053.58	4.98246	0.002712	100	2.39618	0.020526	29.9522	0.256575
BI8622	4188	4197	DLKPNGANIL	8	1053.58	4.99575	0.004343	1000	3.7691	0.085268	47.1138	1.06585
BI8626	4188	4197	DLKPNGANIL	8	1053.58	5.02201	0.079421	0	0	0	0	0
BI8626	4188	4197	DLKPNGANIL	8	1053.58	5.13859	0.036096	10	1.17918	0.054549	14.7397	0.681863
BI8626	4188	4197	DLKPNGANIL	8	1053.58	5.07332	0.009132	30	1.55689	0.021559	19.4611	0.269487
BI8626	4188	4197	DLKPNGANIL	8	1053.58	5.00321	0	100	2.36292	0.02097	29.5364	0.262125
BI8626	4188	4197	DLKPNGANIL	8	1053.58	5.01778	0.009755	1000	3.76611	0.063423	47.0763	0.792787
Apo	4188	4197	DLKPNGANIL	8	1053.58	4.92256	0.066971	0	0	0	0	0
Apo	4188	4197	DLKPNGANIL	8	1053.58	5.0793	0.079796	10	1.13643	0.059116	14.2053	0.73895
Apo	4188	4197	DLKPNGANIL	8	1053.58	5.15165	0.020711	30	1.56175	0.082932	19.5219	1.03665
Apo	4188	4197	DLKPNGANIL	8	1053.58	5.00147	0	100	2.42207	0.025261	30.2758	0.315763
Apo	4188	4197	DLKPNGANIL	8	1053.58	5.02048	0.019792	1000	3.80008	0.094694	47.501	1.18368
BI8622	4189	4197	LKPNGANIL	7	938.554	4.83848	0.06266	0	0	0	0	0
BI8622	4189	4197	LKPNGANIL	7	938.554	5.06245	0.137607	10	1.0095	0.093322	14.4214	1.33317
BI8622	4189	4197	LKPNGANIL	7	938.554	4.89949	0.045703	30	1.45695	0.026173	20.8135	0.3739
BI8622	4189	4197	LKPNGANIL	7	938.554	4.83176	0.000193	100	2.10341	0.02803	30.0487	0.400429
BI8622	4189	4197	LKPNGANIL	7	938.554	4.84968	0.007037	1000	3.06681	0.059284	43.8116	0.846914
BI8626	4189	4197	LKPNGANIL	7	938.554	4.86286	0.060004	0	0	0	0	0
BI8626	4189	4197	LKPNGANIL	7	938.554	4.98669	0.033582	10	1.05831	0.036739	15.1187	0.524843
BI8626	4189	4197	LKPNGANIL	7	938.554	4.92614	0.013674	30	1.43375	0.034561	20.4822	0.493729
BI8626	4189	4197	LKPNGANIL	7	938.554	4.86293	0	100	2.02927	0.024744	28.9896	0.353486
BI8626	4189	4197	LKPNGANIL	7	938.554	4.86598	0.009721	1000	3.11275	0.099021	44.4679	1.41459
Apo	4189	4197	LKPNGANIL	7	938.554	4.79268	0.049802	0	0	0	0	0
Apo	4189	4197	LKPNGANIL	7	938.554	4.92841	0.080662	10	0.973388	0.087569	13.9055	1.25099
Apo	4189	4197	LKPNGANIL	7	938.554	5.00478	0.021615	30	1.27095	0.097225	18.1565	1.38893
Apo	4189	4197	LKPNGANIL	7	938.554	4.85397	0	100	2.06508	0.083555	29.5012	1.19364
Apo	4189	4197	LKPNGANIL	7	938.554	4.87713	0.024442	1000	3.00698	0.1435	42.9568	2.05
BI8622	4198	4201	VTEE	3	476.211	3.77088	0.028857	0	0	0	0	0
BI8622	4198	4201	VTEE	3	476.211	4.05805	0.136581	10	1.00745	0.067892	33.5816	2.26307
BI8622	4198	4201	VTEE	3	476.211	3.8248	0.030472	30	1.08205	0.023749	36.0682	0.791633
BI8622	4198	4201	VTEE	3	476.211	3.71995	0.014235	100	1.00515	0.024969	33.5049	0.8323
BI8622	4198	4201	VTEE	3	476.211	3.76911	0.009498	1000	0.98329	0.032563	32.7763	1.08543
BI8626	4198	4201	VTEE	3	476.211	3.7939	0.021447	0	0	0	0	0
BI8626	4198	4201	VTEE	3	476.211	3.96592	0.037722	10	1.0217	0.02498	34.0568	0.832667
BI8626	4198	4201	VTEE	3	476.211	3.89912	0.019949	30	1.0309	0.019651	34.3633	0.655033
BI8626	4198	4201	VTEE	3	476.211	3.7692	0	100	1.05909	0.009587	35.3028	0.319567
BI8626	4198	4201	VTEE	3	476.211	3.77005	0.009208	1000	1.04146	0.044752	34.7153	1.49173
Apo	4198	4201	VTEE	3	476.211	3.73657	0.009212	0	0	0	0	0
Apo	4198	4201	VTEE	3	476.211	3.85051	0.08274	10	1.01225	0.040157	33.7416	1.33857
Apo	4198	4201	VTEE	3	476.211	4.00079	0.050437	30	1.00605	0.026358	33.5349	0.8786
Apo	4198	4201	VTEE	3	476.211	3.78008	0	100	1.02347	0.025222	34.1155	0.840733
Apo	4198	4201	VTEE	3	476.211	3.80716	0.043843	1000	1.04208	0.027398	34.7359	0.913267
BI8622	4201	4206	ENKKEY	5	809.391	3.76941	0.029516	0	0	0	0	0
BI8622	4201	4206	ENKKEY	5	809.391	4.05806	0.136137	10	0.972224	0.076391	19.4445	1.52782
BI8622	4201	4206	ENKKEY	5	809.391	3.82414	0.03116	30	1.11123	0.059834	22.2247	1.19668
BI8622	4201	4206	ENKKEY	5	809.391	3.72364	0.01183	100	1.30722	0.045158	26.1444	0.90316
BI8622	4201	4206	ENKKEY	5	809.391	3.7724	0.010754	1000	1.31482	0.043756	26.2964	0.87512
BI8626	4201	4206	ENKKEY	5	809.391	3.7955	0.022584	0	0	0	0	0
BI8626	4201	4206	ENKKEY	5	809.391	3.96019	0.02975	10	1.01087	0.023489	20.2174	0.46978
BI8626	4201	4206	ENKKEY	5	809.391	3.89953	0.020767	30	1.102	0.027749	22.04	0.55498
BI8626	4201	4206	ENKKEY	5	809.391	3.77115	0	100	1.22455	0.020696	24.491	0.41392
BI8626	4201	4206	ENKKEY	5	809.391	3.77444	0.018299	1000	1.30193	0.085496	26.0386	1.70992
Apo	4201	4206	ENKKEY	5	809.391	3.73428	0.009941	0	0	0	0	0
Apo	4201	4206	ENKKEY	5	809.391	3.85452	0.080862	10	1.00619	0.061268	20.1239	1.22536
Apo	4201	4206	ENKKEY	5	809.391	4.00203	0.049946	30	1.09664	0.066782	21.9329	1.33564
Apo	4201	4206	ENKKEY	5	809.391	3.78122	0	100	1.27079	0.059392	25.4157	1.18784
Apo	4201	4206	ENKKEY	5	809.391	3.81105	0.043807	1000	1.36476	0.060574	27.2952	1.21148
BI8622	4202	4208	NKKEYVH	6	916.476	3.7691	0.031234	0	0	0	0	0
BI8622	4202	4208	NKKEYVH	6	916.476	4.05821	0.113892	10	0.869949	0.038605	14.4992	0.643417
BI8622	4202	4208	NKKEYVH	6	916.476	3.82244	0.024784	30	0.967546	0.027016	16.1258	0.450267
BI8622	4202	4208	NKKEYVH	6	916.476	3.72716	0.014824	100	1.18254	0.03849	19.709	0.6415
BI8622	4202	4208	NKKEYVH	6	916.476	3.769	0.008648	1000	1.18024	0.007372	19.6707	0.122867
BI8626	4202	4208	NKKEYVH	6	916.476	3.79419	0.020924	0	0	0	0	0
BI8626	4202	4208	NKKEYVH	6	916.476	3.97524	0.026597	10	0.891859	0.035885	14.8643	0.598083
BI8626	4202	4208	NKKEYVH	6	916.476	3.89799	0.018667	30	0.971229	0.021046	16.1871	0.350767
BI8626	4202	4208	NKKEYVH	6	916.476	3.77135	0	100	1.06353	0.017849	17.7255	0.297483
BI8626	4202	4208	NKKEYVH	6	916.476	3.77359	0.006766	1000	1.13316	0.036228	18.8861	0.6038
Apo	4202	4208	NKKEYVH	6	916.476	3.73461	0.00768	0	0	0	0	0
Apo	4202	4208	NKKEYVH	6	916.476	3.84676	0.077566	10	0.91482	0.08526	15.247	1.421
Apo	4202	4208	NKKEYVH	6	916.476	4.02327	0.045745	30	0.980254	0.08912	16.3376	1.48533
Apo	4202	4208	NKKEYVH	6	916.476	3.78336	0	100	1.16747	0.081963	19.4578	1.36605
Apo	4202	4208	NKKEYVH	6	916.476	3.80854	0.045927	1000	1.17624	0.097375	19.604	1.62292
BI8622	4225	4230	AFLEGF	5	682.332	5.63208	0.225359	0	0	0	0	0
BI8622	4225	4230	AFLEGF	5	682.332	5.92277	0.034244	10	0.092119	0.043338	1.84238	0.86676
BI8622	4225	4230	AFLEGF	5	682.332	5.93769	0	30	0.051704	0.041414	1.03408	0.82828
BI8622	4225	4230	AFLEGF	5	682.332	5.85429	0.009739	100	0.048586	0.04509	0.97172	0.9018
BI8622	4225	4230	AFLEGF	5	682.332	5.84786	0.00164	1000	0.077866	0.043256	1.55732	0.86512
BI8626	4225	4230	AFLEGF	5	682.332	5.7994	0.147252	0	0	0	0	0
BI8626	4225	4230	AFLEGF	5	682.332	5.91052	0.01475	10	0.017857	0.009588	0.35714	0.19176
BI8626	4225	4230	AFLEGF	5	682.332	5.8803	0	30	0.050404	0.009225	1.00808	0.1845
BI8626	4225	4230	AFLEGF	5	682.332	5.86227	0	100	0.026346	0.009225	0.52692	0.1845
BI8626	4225	4230	AFLEGF	5	682.332	5.88187	0.014707	1000	0.024236	0.01449	0.48472	0.2898
Apo	4225	4230	AFLEGF	5	682.332	5.62414	0.163824	0	0	0	0	0
Apo	4225	4230	AFLEGF	5	682.332	5.87962	0.03091	10	0.039075	0.011965	0.7815	0.2393
Apo	4225	4230	AFLEGF	5	682.332	5.92565	0.006927	30	0.034924	0.017586	0.69848	0.35172
Apo	4225	4230	AFLEGF	5	682.332	5.85141	0	100	0.058921	0.011032	1.17842	0.22064
Apo	4225	4230	AFLEGF	5	682.332	5.87168	0.007914	1000	0.034114	0.017872	0.68228	0.35744
BI8622	4231	4235	YEIIP	3	633.337	5.35538	0.120095	0	0	0	0	0
BI8622	4231	4235	YEIIP	3	633.337	5.59229	0.135359	10	-0.028444	0.018264	-0.948133	0.6088
BI8622	4231	4235	YEIIP	3	633.337	5.47554	0.043423	30	0.030522	0.046492	1.0174	1.54973
BI8622	4231	4235	YEIIP	3	633.337	5.4244	0.003821	100	-0.033676	0.009464	-1.12253	0.315467
BI8622	4231	4235	YEIIP	3	633.337	5.43621	0.006374	1000	-0.02329	0.008575	-0.776333	0.285833
BI8626	4231	4235	YEIIP	3	633.337	5.38327	0.128295	0	0	0	0	0
BI8626	4231	4235	YEIIP	3	633.337	5.5195	0.026005	10	-0.017936	0.013216	-0.597867	0.440533
BI8626	4231	4235	YEIIP	3	633.337	5.4892	0.007903	30	-0.00602	0.011544	-0.200667	0.3848
BI8626	4231	4235	YEIIP	3	633.337	5.44015	0	100	-0.055422	0.004356	-1.8474	0.1452
BI8626	4231	4235	YEIIP	3	633.337	5.46519	0.005721	1000	0.10298	0.036482	3.43267	1.21607
Apo	4231	4235	YEIIP	3	633.337	5.27462	0.120178	0	0	0	0	0
Apo	4231	4235	YEIIP	3	633.337	5.47738	0.056774	10	-0.014107	0.014164	-0.470233	0.472133
Apo	4231	4235	YEIIP	3	633.337	5.55541	0.012072	30	-0.000169	0.04851	-0.00563333	1.617
Apo	4231	4235	YEIIP	3	633.337	5.43266	0	100	-0.007274	0.010511	-0.242467	0.350367
Apo	4231	4235	YEIIP	3	633.337	5.5413	0.145319	1000	0.029032	0.060471	0.967733	2.0157
BI8622	4231	4238	YEIIPKRL	6	1030.62	4.79767	0.059109	0	0	0	0	0
BI8622	4231	4238	YEIIPKRL	6	1030.62	5.06883	0.148438	10	1.69312	0.110052	28.2187	1.8342
BI8622	4231	4238	YEIIPKRL	6	1030.62	4.85984	0.04465	30	1.94122	0.069579	32.3537	1.15965
BI8622	4231	4238	YEIIPKRL	6	1030.62	4.78477	0.001232	100	1.84103	0.059714	30.6838	0.995233
BI8622	4231	4238	YEIIPKRL	6	1030.62	4.80973	0.004997	1000	1.84276	0.06031	30.7127	1.00517
BI8626	4231	4238	YEIIPKRL	6	1030.62	4.80982	0.062272	0	0	0	0	0
BI8626	4231	4238	YEIIPKRL	6	1030.62	4.94491	0.032375	10	1.7446	0.056508	29.0767	0.9418
BI8626	4231	4238	YEIIPKRL	6	1030.62	4.89095	0.013196	30	1.88722	0.119636	31.4537	1.99393
BI8626	4231	4238	YEIIPKRL	6	1030.62	4.81712	0	100	1.79183	0.05409	29.8638	0.9015
BI8626	4231	4238	YEIIPKRL	6	1030.62	4.8344	0.007787	1000	1.85892	0.106425	30.982	1.77375
Apo	4231	4238	YEIIPKRL	6	1030.62	4.7544	0.043795	0	0	0	0	0
Apo	4231	4238	YEIIPKRL	6	1030.62	4.89318	0.081729	10	1.8352	0.049045	30.5867	0.817417
Apo	4231	4238	YEIIPKRL	6	1030.62	4.95737	0.022472	30	1.89548	0.032734	31.5912	0.545567
Apo	4231	4238	YEIIPKRL	6	1030.62	4.81132	0	100	1.87247	0.029576	31.2079	0.492933
Apo	4231	4238	YEIIPKRL	6	1030.62	4.84791	0.017913	1000	1.91723	0.037911	31.9538	0.63185
BI8622	4232	4236	EIIPK	3	598.369	4.6873	0.047523	0	0	0	0	0
BI8622	4232	4236	EIIPK	3	598.369	4.69091	0.080215	10	0.553548	0.04155	18.4516	1.385
BI8622	4232	4236	EIIPK	3	598.369	4.74505	0.037009	30	0.543095	0.006871	18.1032	0.229033
BI8622	4232	4236	EIIPK	3	598.369	4.6745	0.001935	100	0.513107	0.007216	17.1036	0.240533
BI8622	4232	4236	EIIPK	3	598.369	4.70122	0.009672	1000	0.530783	0.025572	17.6928	0.8524
BI8626	4232	4236	EIIPK	3	598.369	4.71894	0.045652	0	0	0	0	0
BI8626	4232	4236	EIIPK	3	598.369	4.84299	0.034794	10	0.528855	0.017448	17.6285	0.5816
BI8626	4232	4236	EIIPK	3	598.369	4.77719	0.012931	30	0.538055	0.016799	17.9352	0.559967
BI8626	4232	4236	EIIPK	3	598.369	4.71675	0	100	0.522052	0.015121	17.4017	0.504033
BI8626	4232	4236	EIIPK	3	598.369	4.71981	0.002692	1000	0.515554	0.032492	17.1851	1.08307
Apo	4232	4236	EIIPK	3	598.369	4.65212	0.033741	0	0	0	0	0
Apo	4232	4236	EIIPK	3	598.369	4.69599	0.074106	10	0.52553	0.059733	17.5177	1.9911
Apo	4232	4236	EIIPK	3	598.369	4.7525	0.140507	30	0.54442	0.070337	18.1473	2.34457
Apo	4232	4236	EIIPK	3	598.369	4.71155	0	100	0.493031	0.052735	16.4344	1.75783
Apo	4232	4236	EIIPK	3	598.369	4.73282	0.018063	1000	0.523734	0.055053	17.4578	1.8351
BI8622	4237	4242	RLISIF	5	747.464	5.45731	0.137625	0	0	0	0	0
BI8622	4237	4242	RLISIF	5	747.464	5.7007	0.127672	10	0.299203	0.049698	5.98406	0.99396
BI8622	4237	4242	RLISIF	5	747.464	5.58241	0.045205	30	0.579575	0.025071	11.5915	0.50142
BI8622	4237	4242	RLISIF	5	747.464	5.5318	0.005777	100	0.88638	0.022437	17.7276	0.44874
BI8622	4237	4242	RLISIF	5	747.464	5.53725	0.002823	1000	1.27711	0.03837	25.5422	0.7674
BI8626	4237	4242	RLISIF	5	747.464	5.4962	0.136301	0	0	0	0	0
BI8626	4237	4242	RLISIF	5	747.464	5.6223	0.02558	10	0.283532	0.053179	5.67064	1.06358
BI8626	4237	4242	RLISIF	5	747.464	5.58827	0.007455	30	0.519684	0.049772	10.3937	0.99544
BI8626	4237	4242	RLISIF	5	747.464	5.54809	0	100	0.839288	0.035807	16.7858	0.71614
BI8626	4237	4242	RLISIF	5	747.464	5.57422	0.002651	1000	1.26829	0.035863	25.3657	0.71726
Apo	4237	4242	RLISIF	5	747.464	5.37092	0.135194	0	0	0	0	0
Apo	4237	4242	RLISIF	5	747.464	5.58429	0.050081	10	0.298635	0.053334	5.9727	1.06668
Apo	4237	4242	RLISIF	5	747.464	5.65211	0.008664	30	0.485131	0.044184	9.70262	0.88368
Apo	4237	4242	RLISIF	5	747.464	5.54092	0	100	0.846707	0.039835	16.9341	0.7967
Apo	4237	4242	RLISIF	5	747.464	5.55992	0.01195	1000	1.25831	0.057668	25.1663	1.15336
BI8622	4243	4246	TEQE	3	505.202	3.76897	0.029641	0	0	0	0	0
BI8622	4243	4246	TEQE	3	505.202	4.09746	0.151691	10	0.43662	0.011885	14.554	0.396167
BI8622	4243	4246	TEQE	3	505.202	3.82902	0.029598	30	0.490002	0.005939	16.3334	0.197967
BI8622	4243	4246	TEQE	3	505.202	3.71512	0.012663	100	0.51925	0.223394	17.3083	7.44647
BI8622	4243	4246	TEQE	3	505.202	3.76863	0.009807	1000	0.721859	0.00764	24.062	0.254667
BI8626	4243	4246	TEQE	3	505.202	3.78435	0.025259	0	0	0	0	0
BI8626	4243	4246	TEQE	3	505.202	3.93884	0.029875	10	0.433978	0.023932	14.4659	0.797733
BI8626	4243	4246	TEQE	3	505.202	3.90831	0.024121	30	0.474811	0.020937	15.827	0.6979
BI8626	4243	4246	TEQE	3	505.202	3.76459	0	100	0.566763	0.008464	18.8921	0.282133
BI8626	4243	4246	TEQE	3	505.202	3.78592	0.017877	1000	0.738375	0.028548	24.6125	0.9516
Apo	4243	4246	TEQE	3	505.202	3.80779	0.14016	0	0	0	0	0
Apo	4243	4246	TEQE	3	505.202	3.8535	0.087149	10	0.409855	0.065965	13.6618	2.19883
Apo	4243	4246	TEQE	3	505.202	3.96128	0.035909	30	0.472181	0.065982	15.7394	2.1994
Apo	4243	4246	TEQE	3	505.202	3.7761	0	100	0.508671	0.065956	16.9557	2.19853
Apo	4243	4246	TEQE	3	505.202	3.82504	0.035996	1000	0.673114	0.07472	22.4371	2.49067
BI8622	4248	4251	ELLI	3	486.305	5.59526	0.15489	0	0	0	0	0
BI8622	4248	4251	ELLI	3	486.305	5.86608	0.145489	10	-0.012984	0.0355	-0.4328	1.18333
BI8622	4248	4251	ELLI	3	486.305	5.7263	0.042839	30	-0.028007	0.027308	-0.933567	0.910267
BI8622	4248	4251	ELLI	3	486.305	5.67812	0.006091	100	0.039478	0.065794	1.31593	2.19313
BI8622	4248	4251	ELLI	3	486.305	5.68036	0.002931	1000	0.038382	0.063741	1.2794	2.1247
BI8626	4248	4251	ELLI	3	486.305	5.60595	0.155854	0	0	0	0	0
BI8626	4248	4251	ELLI	3	486.305	5.75316	0.020254	10	-0.006894	0.07155	-0.2298	2.385
BI8626	4248	4251	ELLI	3	486.305	5.72587	0.005889	30	-0.003844	0.038837	-0.128133	1.29457
BI8626	4248	4251	ELLI	3	486.305	5.6935	0	100	-0.003112	0.011651	-0.103733	0.388367
BI8626	4248	4251	ELLI	3	486.305	5.70097	0.016376	1000	-0.003424	0.048717	-0.114133	1.6239
Apo	4248	4251	ELLI	3	486.305	5.48008	0.140808	0	0	0	0	0
Apo	4248	4251	ELLI	3	486.305	5.7237	0.043542	10	0.03972	0.047978	1.324	1.59927
Apo	4248	4251	ELLI	3	486.305	5.77567	0.00459	30	0.030432	0.025605	1.0144	0.8535
Apo	4248	4251	ELLI	3	486.305	5.68381	0	100	0.008242	0.017882	0.274733	0.596067
Apo	4248	4251	ELLI	3	486.305	5.71193	0.009853	1000	0.046201	0.059698	1.54003	1.98993
BI8622	4249	4254	LLISGL	5	614.4	5.61142	0.148641	0	0	0	0	0
BI8622	4249	4254	LLISGL	5	614.4	5.74155	0.05152	10	0.726026	0.043935	14.5205	0.8787
BI8622	4249	4254	LLISGL	5	614.4	5.73231	0.04223	30	0.733953	0.028297	14.6791	0.56594
BI8622	4249	4254	LLISGL	5	614.4	5.66825	0.007381	100	0.759267	0.01418	15.1853	0.2836
BI8622	4249	4254	LLISGL	5	614.4	5.66864	0.00137	1000	0.76059	0.0198	15.2118	0.396
BI8626	4249	4254	LLISGL	5	614.4	5.52208	0.150267	0	0	0	0	0
BI8626	4249	4254	LLISGL	5	614.4	5.73278	0.018954	10	0.793307	0.019751	15.8661	0.39502
BI8626	4249	4254	LLISGL	5	614.4	5.71396	0.003614	30	0.765257	0.009305	15.3051	0.1861
BI8626	4249	4254	LLISGL	5	614.4	5.67919	0	100	0.766768	0.009299	15.3354	0.18598
BI8626	4249	4254	LLISGL	5	614.4	5.67755	0.00915	1000	0.760867	0.019739	15.2173	0.39478
Apo	4249	4254	LLISGL	5	614.4	5.42671	0.105949	0	0	0	0	0
Apo	4249	4254	LLISGL	5	614.4	5.71423	0.044924	10	0.809673	0.020373	16.1935	0.40746
Apo	4249	4254	LLISGL	5	614.4	5.75897	0.003716	30	0.799816	0.017154	15.9963	0.34308
Apo	4249	4254	LLISGL	5	614.4	5.67068	0	100	0.787328	0.015484	15.7466	0.30968
Apo	4249	4254	LLISGL	5	614.4	5.70452	0.005477	1000	0.807787	0.036157	16.1557	0.72314
BI8622	4249	4255	LLISGLP	5	711.453	5.5413	0.149476	0	0	0	0	0
BI8622	4249	4255	LLISGLP	5	711.453	5.77327	0.117361	10	0.737907	0.048951	14.7581	0.97902
BI8622	4249	4255	LLISGLP	5	711.453	5.67326	0.044374	30	0.775109	0.017114	15.5022	0.34228
BI8622	4249	4255	LLISGLP	5	711.453	5.62448	0.006232	100	0.7031	0.018852	14.062	0.37704
BI8622	4249	4255	LLISGLP	5	711.453	5.62558	0.003066	1000	0.725853	0.036998	14.5171	0.73996
BI8626	4249	4255	LLISGLP	5	711.453	5.58288	0.142716	0	0	0	0	0
BI8626	4249	4255	LLISGLP	5	711.453	5.70287	0.02272	10	0.739777	0.040114	14.7955	0.80228
BI8626	4249	4255	LLISGLP	5	711.453	5.67376	0.00472	30	0.743463	0.031203	14.8693	0.62406
BI8626	4249	4255	LLISGLP	5	711.453	5.63701	0	100	0.66742	0.027015	13.3484	0.5403
BI8626	4249	4255	LLISGLP	5	711.453	5.66953	0.007731	1000	0.741723	0.027853	14.8345	0.55706
Apo	4249	4255	LLISGLP	5	711.453	5.44245	0.137657	0	0	0	0	0
Apo	4249	4255	LLISGLP	5	711.453	5.66865	0.043266	10	0.718573	0.029388	14.3715	0.58776
Apo	4249	4255	LLISGLP	5	711.453	5.72681	0.003875	30	0.725439	0.035948	14.5088	0.71896
Apo	4249	4255	LLISGLP	5	711.453	5.63103	0	100	0.687622	0.024444	13.7524	0.48888
Apo	4249	4255	LLISGLP	5	711.453	5.65233	0.006669	1000	0.696332	0.048084	13.9266	0.96168
BI8622	4250	4255	LISGLP	4	598.369	5.23399	0.106635	0	0	0	0	0
BI8622	4250	4255	LISGLP	4	598.369	5.45398	0.116162	10	0.648979	0.050365	16.2245	1.25913
BI8622	4250	4255	LISGLP	4	598.369	5.34114	0.050033	30	0.693991	0.04103	17.3498	1.02575
BI8622	4250	4255	LISGLP	4	598.369	5.2864	0.002787	100	0.606667	0.036358	15.1667	0.90895
BI8622	4250	4255	LISGLP	4	598.369	5.29386	0.001864	1000	0.635807	0.044618	15.8952	1.11545
BI8626	4250	4255	LISGLP	4	598.369	5.27683	0.11456	0	0	0	0	0
BI8626	4250	4255	LISGLP	4	598.369	5.39898	0.020464	10	0.639285	0.103287	15.9821	2.58217
BI8626	4250	4255	LISGLP	4	598.369	5.35617	0.008622	30	0.647284	0.098635	16.1821	2.46588
BI8626	4250	4255	LISGLP	4	598.369	5.30109	0	100	0.58826	0.097225	14.7065	2.43063
BI8626	4250	4255	LISGLP	4	598.369	5.33785	0.006875	1000	0.619771	0.09726	15.4943	2.4315
Apo	4250	4255	LISGLP	4	598.369	5.16535	0.102701	0	0	0	0	0
Apo	4250	4255	LISGLP	4	598.369	5.33594	0.06123	10	0.62422	0.062023	15.6055	1.55058
Apo	4250	4255	LISGLP	4	598.369	5.42135	0.010052	30	0.623332	0.0617	15.5833	1.5425
Apo	4250	4255	LISGLP	4	598.369	5.29443	0	100	0.596384	0.059094	14.9096	1.47735
Apo	4250	4255	LISGLP	4	598.369	5.3179	0.016612	1000	0.583941	0.064023	14.5985	1.60057
BI8622	4250	4258	LISGLPTID	7	927.527	5.33996	0.125823	0	0	0	0	0
BI8622	4250	4258	LISGLPTID	7	927.527	5.62111	0.14673	10	2.58021	0.094289	36.8602	1.34699
BI8622	4250	4258	LISGLPTID	7	927.527	5.4752	0.039857	30	2.69936	0.049178	38.5623	0.702543
BI8622	4250	4258	LISGLPTID	7	927.527	5.42083	0.003961	100	2.64682	0.043092	37.8117	0.6156
BI8622	4250	4258	LISGLPTID	7	927.527	5.43186	0.004617	1000	2.61104	0.04428	37.3006	0.632571
BI8626	4250	4258	LISGLPTID	7	927.527	5.32326	0.124906	0	0	0	0	0
BI8626	4250	4258	LISGLPTID	7	927.527	5.50174	0.021634	10	2.70369	0.123804	38.6241	1.76863
BI8626	4250	4258	LISGLPTID	7	927.527	5.48553	0.005628	30	2.69721	0.079126	38.5315	1.13037
BI8626	4250	4258	LISGLPTID	7	927.527	5.42959	0	100	2.72087	0.075658	38.8696	1.08083
BI8626	4250	4258	LISGLPTID	7	927.527	5.43532	0.009584	1000	2.67757	0.086218	38.2511	1.23169
Apo	4250	4258	LISGLPTID	7	927.527	5.22219	0.09632	0	0	0	0	0
Apo	4250	4258	LISGLPTID	7	927.527	5.45824	0.050122	10	2.67051	0.159981	38.1501	2.28544
Apo	4250	4258	LISGLPTID	7	927.527	5.53859	0.012637	30	2.78699	0.062034	39.8142	0.8862
Apo	4250	4258	LISGLPTID	7	927.527	5.42587	0	100	2.75776	0.060006	39.3965	0.857229
Apo	4250	4258	LISGLPTID	7	927.527	5.46685	0.0089	1000	2.73827	0.079896	39.1181	1.14137
BI8622	4250	4260	LISGLPTIDID	9	1155.64	5.46999	0.146905	0	0	0	0	0
BI8622	4250	4260	LISGLPTIDID	9	1155.64	5.70868	0.103695	10	3.97971	0.179604	44.219	1.9956
BI8622	4250	4260	LISGLPTIDID	9	1155.64	5.61072	0.03863	30	4.19269	0.05033	46.5855	0.559222
BI8622	4250	4260	LISGLPTIDID	9	1155.64	5.58073	0.007685	100	3.89564	0.01474	43.2849	0.163778
BI8622	4250	4260	LISGLPTIDID	9	1155.64	5.57912	0.007492	1000	3.9575	0.0829	43.9722	0.921111
BI8626	4250	4260	LISGLPTIDID	9	1155.64	5.57165	0.124797	0	0	0	0	0
BI8626	4250	4260	LISGLPTIDID	9	1155.64	5.66567	0.015908	10	4.05554	0.072965	45.0615	0.810722
BI8626	4250	4260	LISGLPTIDID	9	1155.64	5.62274	0.005083	30	4.07719	0.05529	45.3021	0.614333
BI8626	4250	4260	LISGLPTIDID	9	1155.64	5.59811	0	100	3.89503	0.032382	43.2781	0.3598
BI8626	4250	4260	LISGLPTIDID	9	1155.64	5.62266	0.00385	1000	4.02156	0.039314	44.684	0.436822
Apo	4250	4260	LISGLPTIDID	9	1155.64	5.41115	0.140341	0	0	0	0	0
Apo	4250	4260	LISGLPTIDID	9	1155.64	5.61786	0.038847	10	4.02117	0.016006	44.6797	0.177844
Apo	4250	4260	LISGLPTIDID	9	1155.64	5.68063	0.005537	30	4.04613	0.085204	44.957	0.946711
Apo	4250	4260	LISGLPTIDID	9	1155.64	5.58538	0	100	3.97732	0.003931	44.1925	0.0436778
Apo	4250	4260	LISGLPTIDID	9	1155.64	5.6003	0.008237	1000	3.95686	0.085856	43.9651	0.953956
BI8622	4251	4258	ISGLPTID	6	814.443	5.18745	0.100258	0	0	0	0	0
BI8622	4251	4258	ISGLPTID	6	814.443	5.4523	0.13915	10	2.56043	0.059499	42.6738	0.99165
BI8622	4251	4258	ISGLPTID	6	814.443	5.27462	0.036485	30	2.65101	0.037505	44.1834	0.625083
BI8622	4251	4258	ISGLPTID	6	814.443	5.2231	0.002773	100	2.56169	0.044778	42.6948	0.7463
BI8622	4251	4258	ISGLPTID	6	814.443	5.23462	0.003268	1000	2.55937	0.029816	42.6561	0.496933
BI8626	4251	4258	ISGLPTID	6	814.443	5.20889	0.111676	0	0	0	0	0
BI8626	4251	4258	ISGLPTID	6	814.443	5.32775	0.031533	10	2.64249	0.028423	44.0414	0.473717
BI8626	4251	4258	ISGLPTID	6	814.443	5.28932	0.00387	30	2.63241	0.023046	43.8735	0.3841
BI8626	4251	4258	ISGLPTID	6	814.443	5.24201	0	100	2.60647	0.008814	43.4412	0.1469
BI8626	4251	4258	ISGLPTID	6	814.443	5.25771	0.012011	1000	2.6121	0.053083	43.535	0.884717
Apo	4251	4258	ISGLPTID	6	814.443	5.11142	0.091682	0	0	0	0	0
Apo	4251	4258	ISGLPTID	6	814.443	5.28818	0.064262	10	2.6387	0.022198	43.9783	0.369967
Apo	4251	4258	ISGLPTID	6	814.443	5.36148	0.01954	30	2.6296	0.023686	43.8267	0.394767
Apo	4251	4258	ISGLPTID	6	814.443	5.23744	0	100	2.50038	0.015951	41.6731	0.26585
Apo	4251	4258	ISGLPTID	6	814.443	5.26609	0.009519	1000	2.56496	0.061587	42.7493	1.02645
BI8622	4253	4258	GLPTID	4	614.327	5.00856	0.080427	0	0	0	0	0
BI8622	4253	4258	GLPTID	4	614.327	5.23518	0.133125	10	2.25802	0.072119	56.4504	1.80297
BI8622	4253	4258	GLPTID	4	614.327	5.08399	0.043207	30	2.32631	0.044067	58.1578	1.10167
BI8622	4253	4258	GLPTID	4	614.327	5.01864	0.000682	100	2.28203	0.098411	57.0508	2.46027
BI8622	4253	4258	GLPTID	4	614.327	5.03413	0.005331	1000	2.31371	0.099254	57.8427	2.48135
BI8626	4253	4258	GLPTID	4	614.327	5.04973	0.085865	0	0	0	0	0
BI8626	4253	4258	GLPTID	4	614.327	5.1741	0.032933	10	2.3	0.053854	57.5001	1.34635
BI8626	4253	4258	GLPTID	4	614.327	5.10781	0.004864	30	2.31486	0.029659	57.8714	0.741475
BI8626	4253	4258	GLPTID	4	614.327	5.04794	0	100	2.26221	0.029624	56.5553	0.7406
BI8626	4253	4258	GLPTID	4	614.327	5.06457	7.0941e-05	1000	2.25126	0.037428	56.2814	0.9357
Apo	4253	4258	GLPTID	4	614.327	4.958	0.07408	0	0	0	0	0
Apo	4253	4258	GLPTID	4	614.327	5.10813	0.075478	10	2.34013	0.031027	58.5032	0.775675
Apo	4253	4258	GLPTID	4	614.327	5.18668	0.019917	30	2.28546	0.021706	57.1365	0.54265
Apo	4253	4258	GLPTID	4	614.327	5.03902	0	100	2.22427	0.016019	55.6067	0.400475
Apo	4253	4258	GLPTID	4	614.327	5.06365	0.016475	1000	2.29099	0.057156	57.2747	1.4289
BI8622	4261	4265	DLKSN	4	575.291	3.75579	0.021728	0	0	0	0	0
BI8622	4261	4265	DLKSN	4	575.291	4.06078	0.139871	10	0.178622	0.010888	4.46555	0.2722
BI8622	4261	4265	DLKSN	4	575.291	3.8318	0.029399	30	0.263852	0.022955	6.5963	0.573875
BI8622	4261	4265	DLKSN	4	575.291	3.7215	0.012016	100	0.403081	0.012629	10.077	0.315725
BI8622	4261	4265	DLKSN	4	575.291	3.76926	0.007885	1000	0.467275	0.037569	11.6819	0.939225
BI8626	4261	4265	DLKSN	4	575.291	3.98883	0.20239	0	0	0	0	0
BI8626	4261	4265	DLKSN	4	575.291	3.95346	0.032634	10	0.254749	0.056216	6.36873	1.4054
BI8626	4261	4265	DLKSN	4	575.291	3.90727	0.023973	30	0.275329	0.046689	6.88322	1.16722
BI8626	4261	4265	DLKSN	4	575.291	3.76808	0	100	0.43124	0.041726	10.781	1.04315
BI8626	4261	4265	DLKSN	4	575.291	3.78232	0.017917	1000	0.476146	0.092554	11.9037	2.31385
Apo	4261	4265	DLKSN	4	575.291	3.93938	0.235286	0	0	0	0	0
Apo	4261	4265	DLKSN	4	575.291	3.84534	0.079256	10	0.265956	0.026264	6.6489	0.6566
Apo	4261	4265	DLKSN	4	575.291	3.97721	0.045846	30	0.324448	0.027415	8.1112	0.685375
Apo	4261	4265	DLKSN	4	575.291	3.78248	0	100	0.453984	0.021315	11.3496	0.532875
Apo	4261	4265	DLKSN	4	575.291	3.81879	0.040442	1000	0.523268	0.03481	13.0817	0.87025
BI8622	4262	4274	LKSNTEYHKYQSN	12	1610.77	3.79609	0.019055	0	0	0	0	0
BI8622	4262	4274	LKSNTEYHKYQSN	12	1610.77	4.05184	0.099419	10	2.43933	0.194673	20.3277	1.62228
BI8622	4262	4274	LKSNTEYHKYQSN	12	1610.77	3.83794	0.043803	30	2.72322	0.012194	22.6935	0.101617
BI8622	4262	4274	LKSNTEYHKYQSN	12	1610.77	3.72578	0.015221	100	2.85047	0.096541	23.754	0.804508
BI8622	4262	4274	LKSNTEYHKYQSN	12	1610.77	3.77693	0.013773	1000	3.99228	0.003617	33.269	0.0301417
BI8626	4262	4274	LKSNTEYHKYQSN	12	1610.77	3.80227	0.014259	0	0	0	0	0
BI8626	4262	4274	LKSNTEYHKYQSN	12	1610.77	3.96996	0.026614	10	2.46408	0.077884	20.534	0.649033
BI8626	4262	4274	LKSNTEYHKYQSN	12	1610.77	3.88995	0.017523	30	2.579	0.036304	21.4917	0.302533
BI8626	4262	4274	LKSNTEYHKYQSN	12	1610.77	3.76358	0	100	2.82499	0.014638	23.5416	0.121983
BI8626	4262	4274	LKSNTEYHKYQSN	12	1610.77	3.77644	0.012544	1000	3.66437	0.021023	30.5364	0.175192
Apo	4262	4274	LKSNTEYHKYQSN	12	1610.77	3.7465	0.015093	0	0	0	0	0
Apo	4262	4274	LKSNTEYHKYQSN	12	1610.77	3.84511	0.074662	10	2.43705	0.039167	20.3087	0.326392
Apo	4262	4274	LKSNTEYHKYQSN	12	1610.77	4.01899	0.05123	30	2.55551	0.038568	21.2959	0.3214
Apo	4262	4274	LKSNTEYHKYQSN	12	1610.77	3.77114	0	100	3.01568	0.023064	25.1307	0.1922
Apo	4262	4274	LKSNTEYHKYQSN	12	1610.77	3.808	0.04539	1000	3.93924	0.185558	32.827	1.54632
BI8622	4266	4271	TEYHKY	5	839.381	3.88828	0.011117	0	0	0	0	0
BI8622	4266	4271	TEYHKY	5	839.381	4.1482	0.126026	10	0.37889	0.05722	7.5778	1.1444
BI8622	4266	4271	TEYHKY	5	839.381	3.91447	0.047656	30	0.541047	0.02474	10.8209	0.4948
BI8622	4266	4271	TEYHKY	5	839.381	3.72264	0.011945	100	0.80262	0.021489	16.0524	0.42978
BI8622	4266	4271	TEYHKY	5	839.381	3.88925	0.008079	1000	1.31073	0.039749	26.2146	0.79498
BI8626	4266	4271	TEYHKY	5	839.381	3.90829	0.019629	0	0	0	0	0
BI8626	4266	4271	TEYHKY	5	839.381	4.06631	0.047042	10	0.397067	0.030214	7.94134	0.60428
BI8626	4266	4271	TEYHKY	5	839.381	3.98054	0.023809	30	0.487322	0.016019	9.74644	0.32038
BI8626	4266	4271	TEYHKY	5	839.381	3.78465	0	100	0.696872	0.014806	13.9374	0.29612
BI8626	4266	4271	TEYHKY	5	839.381	3.87373	0.022958	1000	1.2755	0.06862	25.51	1.3724
Apo	4266	4271	TEYHKY	5	839.381	3.854	0.020794	0	0	0	0	0
Apo	4266	4271	TEYHKY	5	839.381	3.95446	0.100203	10	0.409239	0.050929	8.18478	1.01858
Apo	4266	4271	TEYHKY	5	839.381	4.0826	0.039702	30	0.472687	0.027252	9.45374	0.54504
Apo	4266	4271	TEYHKY	5	839.381	3.79286	0	100	0.791948	0.026343	15.839	0.52686
Apo	4266	4271	TEYHKY	5	839.381	3.91633	0.034392	1000	1.29068	0.05324	25.8135	1.0648
BI8622	4266	4274	TEYHKYQSN	8	1168.51	3.76711	0.03023	0	0	0	0	0
BI8622	4266	4274	TEYHKYQSN	8	1168.51	4.0528	0.121883	10	1.9823	0.129166	24.7787	1.61458
BI8622	4266	4274	TEYHKYQSN	8	1168.51	3.82094	0.026759	30	2.23389	0.029348	27.9236	0.36685
BI8622	4266	4274	TEYHKYQSN	8	1168.51	3.72059	0.012565	100	2.38316	0.043519	29.7895	0.543988
BI8622	4266	4274	TEYHKYQSN	8	1168.51	3.76801	0.009182	1000	2.92032	0.153412	36.504	1.91765
BI8626	4266	4274	TEYHKYQSN	8	1168.51	3.79281	0.023833	0	0	0	0	0
BI8626	4266	4274	TEYHKYQSN	8	1168.51	3.9662	0.029588	10	2.0892	0.120124	26.1149	1.50155
BI8626	4266	4274	TEYHKYQSN	8	1168.51	3.89613	0.020379	30	2.17927	0.033081	27.2409	0.413513
BI8626	4266	4274	TEYHKYQSN	8	1168.51	3.76906	0	100	2.26916	0.030598	28.3645	0.382475
BI8626	4266	4274	TEYHKYQSN	8	1168.51	3.77303	0.01005	1000	2.73092	0.071332	34.1365	0.89165
Apo	4266	4274	TEYHKYQSN	8	1168.51	3.73386	0.010221	0	0	0	0	0
Apo	4266	4274	TEYHKYQSN	8	1168.51	3.84608	0.078291	10	2.01468	0.06236	25.1835	0.7795
Apo	4266	4274	TEYHKYQSN	8	1168.51	4.0104	0.050939	30	2.14598	0.026854	26.8247	0.335675
Apo	4266	4274	TEYHKYQSN	8	1168.51	3.78063	0	100	2.55031	0.012102	31.8788	0.151275
Apo	4266	4274	TEYHKYQSN	8	1168.51	3.80881	0.04596	1000	2.93934	0.050328	36.7418	0.6291
BI8622	4276	4280	IQIQW	4	686.375	5.54981	0.148514	0	0	0	0	0
BI8622	4276	4280	IQIQW	4	686.375	5.78997	0.127072	10	-0.029123	0.031935	-0.728075	0.798375
BI8622	4276	4280	IQIQW	4	686.375	5.68757	0.043262	30	0.039564	0.018483	0.9891	0.462075
BI8622	4276	4280	IQIQW	4	686.375	5.63551	0.007197	100	0.048032	0.016955	1.2008	0.423875
BI8622	4276	4280	IQIQW	4	686.375	5.63559	0.001216	1000	0.441131	0.020291	11.0283	0.507275
BI8626	4276	4280	IQIQW	4	686.375	5.57726	0.14727	0	0	0	0	0
BI8626	4276	4280	IQIQW	4	686.375	5.71076	0.021494	10	-0.012548	0.045538	-0.3137	1.13845
BI8626	4276	4280	IQIQW	4	686.375	5.68477	0.005271	30	0.013486	0.042948	0.33715	1.0737
BI8626	4276	4280	IQIQW	4	686.375	5.64766	0	100	0.006296	0.042353	0.1574	1.05883
BI8626	4276	4280	IQIQW	4	686.375	5.67049	0.018865	1000	0.392625	0.057863	9.81563	1.44657
Apo	4276	4280	IQIQW	4	686.375	5.45286	0.138107	0	0	0	0	0
Apo	4276	4280	IQIQW	4	686.375	5.67875	0.042297	10	-0.002551	0.022328	-0.063775	0.5582
Apo	4276	4280	IQIQW	4	686.375	5.73449	0.005297	30	-0.015263	0.022103	-0.381575	0.552575
Apo	4276	4280	IQIQW	4	686.375	5.64131	0	100	0.053729	0.018982	1.34322	0.47455
Apo	4276	4280	IQIQW	4	686.375	5.66651	0.008062	1000	0.392887	0.025103	9.82217	0.627575
BI8622	4276	4281	IQIQWF	5	833.443	5.90024	0.205393	0	0	0	0	0
BI8622	4276	4281	IQIQWF	5	833.443	6.19767	0.137005	10	0.098639	0.050273	1.97278	1.00546
BI8622	4276	4281	IQIQWF	5	833.443	6.03765	0.022429	30	0.066152	0.057504	1.32304	1.15008
BI8622	4276	4281	IQIQWF	5	833.443	6.02369	0.015959	100	0.251272	0.037837	5.02544	0.75674
BI8622	4276	4281	IQIQWF	5	833.443	6.00828	0.002047	1000	0.595173	0.054987	11.9035	1.09974
BI8626	4276	4281	IQIQWF	5	833.443	5.80286	0.187948	0	0	0	0	0
BI8626	4276	4281	IQIQWF	5	833.443	6.05031	0.008761	10	0.223661	0.057925	4.47322	1.1585
BI8626	4276	4281	IQIQWF	5	833.443	6.03876	0.003079	30	0.181064	0.050395	3.62128	1.0079
BI8626	4276	4281	IQIQWF	5	833.443	6.03458	0	100	0.287592	0.041627	5.75184	0.83254
BI8626	4276	4281	IQIQWF	5	833.443	6.00584	0	1000	0.56693	0.041627	11.3386	0.83254
Apo	4276	4281	IQIQWF	5	833.443	5.67157	0.132964	0	0	0	0	0
Apo	4276	4281	IQIQWF	5	833.443	6.03441	0.018608	10	0.169	0.02814	3.38	0.5628
Apo	4276	4281	IQIQWF	5	833.443	6.06937	0.012289	30	0.202927	0.030518	4.05854	0.61036
Apo	4276	4281	IQIQWF	5	833.443	6.00917	0	100	0.232794	0.018305	4.65588	0.3661
Apo	4276	4281	IQIQWF	5	833.443	6.03491	0.005513	1000	0.596915	0.03241	11.9383	0.6482
BI8622	4282	4296	WRALRSFDQADRAKF	14	1865.96	4.7797	0.05838	0	0	0	0	0
BI8622	4282	4296	WRALRSFDQADRAKF	14	1865.96	5.0583	0.158833	10	1.73687	0.081974	12.4062	0.585529
BI8622	4282	4296	WRALRSFDQADRAKF	14	1865.96	4.87166	0.021742	30	1.86675	0.135148	13.3339	0.965343
BI8622	4282	4296	WRALRSFDQADRAKF	14	1865.96	4.75913	0.001726	100	2.36676	0.015773	16.9054	0.112664
BI8622	4282	4296	WRALRSFDQADRAKF	14	1865.96	4.78488	0.005263	1000	2.65456	0.034693	18.9612	0.247807
BI8626	4282	4296	WRALRSFDQADRAKF	14	1865.96	4.75661	0.043756	0	0	0	0	0
BI8626	4282	4296	WRALRSFDQADRAKF	14	1865.96	4.9037	0.029401	10	1.89542	0.120611	13.5387	0.861507
BI8626	4282	4296	WRALRSFDQADRAKF	14	1865.96	4.87893	0.00694	30	1.998	0.175054	14.2714	1.25039
BI8626	4282	4296	WRALRSFDQADRAKF	14	1865.96	4.79217	0	100	2.39667	0.020606	17.1191	0.147186
BI8626	4282	4296	WRALRSFDQADRAKF	14	1865.96	4.81457	0	1000	2.6849	0.020606	19.1778	0.147186
Apo	4282	4296	WRALRSFDQADRAKF	14	1865.96	4.72165	0.016846	0	0	0	0	0
Apo	4282	4296	WRALRSFDQADRAKF	14	1865.96	4.86522	0.086128	10	1.89119	0.046155	13.5085	0.329679
Apo	4282	4296	WRALRSFDQADRAKF	14	1865.96	4.92234	0.013038	30	2.07913	0.113722	14.8509	0.8123
Apo	4282	4296	WRALRSFDQADRAKF	14	1865.96	4.7838	0	100	2.35083	0.034747	16.7917	0.248193
Apo	4282	4296	WRALRSFDQADRAKF	14	1865.96	4.83286	0.007071	1000	2.62384	0.125573	18.7417	0.89695
BI8622	4285	4288	LRSF	3	521.296	4.62936	0.040787	0	0	0	0	0
BI8622	4285	4288	LRSF	3	521.296	4.86914	0.137174	10	0.09067	0.05934	3.02233	1.978
BI8622	4285	4288	LRSF	3	521.296	4.68452	0.050682	30	0.259271	0.030741	8.64237	1.0247
BI8622	4285	4288	LRSF	3	521.296	4.60663	0.002683	100	0.289069	0.014589	9.63563	0.4863
BI8622	4285	4288	LRSF	3	521.296	4.63241	0.004787	1000	0.587897	0.049907	19.5966	1.66357
BI8626	4285	4288	LRSF	3	521.296	4.65336	0.038464	0	0	0	0	0
BI8626	4285	4288	LRSF	3	521.296	4.78775	0.036533	10	0.100925	0.064508	3.36417	2.15027
BI8626	4285	4288	LRSF	3	521.296	4.73009	0.011843	30	0.188362	0.043536	6.27873	1.4512
BI8626	4285	4288	LRSF	3	521.296	4.64248	0	100	0.209437	0.038737	6.98123	1.29123
BI8626	4285	4288	LRSF	3	521.296	4.65172	0.017253	1000	0.577604	0.075557	19.2535	2.51857
Apo	4285	4288	LRSF	3	521.296	4.59748	0.024019	0	0	0	0	0
Apo	4285	4288	LRSF	3	521.296	4.7089	0.08581	10	0.046239	0.041822	1.5413	1.39407
Apo	4285	4288	LRSF	3	521.296	4.80128	0.028146	30	0.130174	0.055831	4.33913	1.86103
Apo	4285	4288	LRSF	3	521.296	4.63536	0	100	0.272523	0.034856	9.0841	1.16187
Apo	4285	4288	LRSF	3	521.296	4.66473	0.026577	1000	0.53692	0.071647	17.8973	2.38823
BI8622	4285	4296	LRSFDQADRAKF	11	1452.75	4.56281	0.043601	0	0	0	0	0
BI8622	4285	4296	LRSFDQADRAKF	11	1452.75	4.84157	0.150186	10	1.61941	0.085666	14.7219	0.778782
BI8622	4285	4296	LRSFDQADRAKF	11	1452.75	4.63358	0.026914	30	1.6799	0.19103	15.2718	1.73664
BI8622	4285	4296	LRSFDQADRAKF	11	1452.75	4.52784	0.002967	100	2.20551	0.055249	20.0501	0.502264
BI8622	4285	4296	LRSFDQADRAKF	11	1452.75	4.55918	0.007594	1000	2.41636	0.064338	21.967	0.584891
BI8626	4285	4296	LRSFDQADRAKF	11	1452.75	4.55772	0.028171	0	0	0	0	0
BI8626	4285	4296	LRSFDQADRAKF	11	1452.75	4.6993	0.038618	10	1.75905	0.14963	15.9914	1.36027
BI8626	4285	4296	LRSFDQADRAKF	11	1452.75	4.65763	0.014521	30	1.74117	0.235679	15.8289	2.14254
BI8626	4285	4296	LRSFDQADRAKF	11	1452.75	4.56851	0	100	2.28075	0.038368	20.7341	0.3488
BI8626	4285	4296	LRSFDQADRAKF	11	1452.75	4.59884	0	1000	2.48201	0.038368	22.5637	0.3488
Apo	4285	4296	LRSFDQADRAKF	11	1452.75	4.53752	0.017108	0	0	0	0	0
Apo	4285	4296	LRSFDQADRAKF	11	1452.75	4.64506	0.086608	10	1.8409	0.126579	16.7354	1.15072
Apo	4285	4296	LRSFDQADRAKF	11	1452.75	4.70862	0.015517	30	1.93008	0.185909	17.5462	1.69008
Apo	4285	4296	LRSFDQADRAKF	11	1452.75	4.56089	0	100	2.111	0.112239	19.1909	1.02035
Apo	4285	4296	LRSFDQADRAKF	11	1452.75	4.60217	0.010481	1000	2.41754	0.225231	21.9776	2.04755
BI8622	4294	4298	AKFLQ	4	605.353	4.60767	0.038154	0	0	0	0	0
BI8622	4294	4298	AKFLQ	4	605.353	4.82608	0.122116	10	0.033473	0.022978	0.836825	0.57445
BI8622	4294	4298	AKFLQ	4	605.353	4.65573	0.049141	30	0.080797	0.019232	2.01992	0.4808
BI8622	4294	4298	AKFLQ	4	605.353	4.57962	0.003186	100	0.087639	0.017189	2.19097	0.429725
BI8622	4294	4298	AKFLQ	4	605.353	4.60896	0.00544	1000	0.020213	0.017432	0.505325	0.4358
BI8626	4294	4298	AKFLQ	4	605.353	4.63868	0.033717	0	0	0	0	0
BI8626	4294	4298	AKFLQ	4	605.353	4.79029	0.013301	10	0.061986	0.01954	1.54965	0.4885
BI8626	4294	4298	AKFLQ	4	605.353	4.69425	0.016796	30	0.057995	0.033837	1.44988	0.845925
BI8626	4294	4298	AKFLQ	4	605.353	4.61902	0	100	0.008388	0.008316	0.2097	0.2079
BI8626	4294	4298	AKFLQ	4	605.353	4.62103	0.007374	1000	0.068214	0.039162	1.70535	0.97905
Apo	4294	4298	AKFLQ	4	605.353	4.57718	0.028541	0	0	0	0	0
Apo	4294	4298	AKFLQ	4	605.353	4.67741	0.080757	10	-0.015671	0.019806	-0.391775	0.49515
Apo	4294	4298	AKFLQ	4	605.353	4.79146	0.022355	30	0.07783	0.031995	1.94575	0.799875
Apo	4294	4298	AKFLQ	4	605.353	4.61085	0	100	0.076405	0.018133	1.91013	0.453325
Apo	4294	4298	AKFLQ	4	605.353	4.62736	0.019923	1000	0.022801	0.042698	0.570025	1.06745
BI8622	4294	4299	AKFLQF	5	752.422	5.30507	0.119475	0	0	0	0	0
BI8622	4294	4299	AKFLQF	5	752.422	5.53919	0.076973	10	0.136569	0.032326	2.73138	0.64652
BI8622	4294	4299	AKFLQF	5	752.422	5.43574	0.041423	30	0.178875	0.013433	3.5775	0.26866
BI8622	4294	4299	AKFLQF	5	752.422	5.41529	0.003825	100	0.051018	0.051053	1.02036	1.02106
BI8622	4294	4299	AKFLQF	5	752.422	5.41952	0.003418	1000	0.140865	0.020668	2.8173	0.41336
BI8626	4294	4299	AKFLQF	5	752.422	5.41584	0.100913	0	0	0	0	0
BI8626	4294	4299	AKFLQF	5	752.422	5.50305	0.013127	10	0.140078	0.067714	2.80156	1.35428
BI8626	4294	4299	AKFLQF	5	752.422	5.45504	0.008022	30	0.138204	0.03119	2.76408	0.6238
BI8626	4294	4299	AKFLQF	5	752.422	5.4107	0	100	-0.002326	0.03074	-0.04652	0.6148
BI8626	4294	4299	AKFLQF	5	752.422	5.45256	0.003778	1000	0.110044	0.030892	2.20088	0.61784
Apo	4294	4299	AKFLQF	5	752.422	5.24813	0.118476	0	0	0	0	0
Apo	4294	4299	AKFLQF	5	752.422	5.43751	0.045288	10	0.101348	0.033119	2.02696	0.66238
Apo	4294	4299	AKFLQF	5	752.422	5.52564	0.007284	30	0.126979	0.035918	2.53958	0.71836
Apo	4294	4299	AKFLQF	5	752.422	5.41827	0	100	0.100529	0.029668	2.01058	0.59336
Apo	4294	4299	AKFLQF	5	752.422	5.43723	0.015454	1000	0.095361	0.03502	1.90722	0.7004
BI8622	4297	4310	LQFVTGTSKVPLQG	12	1473.82	4.94069	0.071103	0	0	0	0	0
BI8622	4297	4310	LQFVTGTSKVPLQG	12	1473.82	5.21722	0.152566	10	1.69195	0.079728	14.0996	0.6644
BI8622	4297	4310	LQFVTGTSKVPLQG	12	1473.82	5.02606	0.036148	30	2.00494	0.044045	16.7079	0.367042
BI8622	4297	4310	LQFVTGTSKVPLQG	12	1473.82	4.92832	0.000326	100	2.59511	0.030051	21.6259	0.250425
BI8622	4297	4310	LQFVTGTSKVPLQG	12	1473.82	4.94674	0.006649	1000	3.586	0.071321	29.8833	0.594342
BI8626	4297	4310	LQFVTGTSKVPLQG	12	1473.82	4.91667	0.066685	0	0	0	0	0
BI8626	4297	4310	LQFVTGTSKVPLQG	12	1473.82	5.0621	0.01904	10	1.82194	0.067098	15.1828	0.55915
BI8626	4297	4310	LQFVTGTSKVPLQG	12	1473.82	5.02429	0.004255	30	2.03435	0.060009	16.9529	0.500075
BI8626	4297	4310	LQFVTGTSKVPLQG	12	1473.82	4.94472	0	100	2.62204	0.058851	21.8503	0.490425
BI8626	4297	4310	LQFVTGTSKVPLQG	12	1473.82	4.95844	9.6127e-05	1000	3.67574	0.066095	30.6312	0.550792
Apo	4297	4310	LQFVTGTSKVPLQG	12	1473.82	4.86953	0.047078	0	0	0	0	0
Apo	4297	4310	LQFVTGTSKVPLQG	12	1473.82	5.03766	0.081018	10	1.84484	0.05181	15.3737	0.43175
Apo	4297	4310	LQFVTGTSKVPLQG	12	1473.82	5.08174	0.012542	30	2.04571	0.065633	17.0476	0.546942
Apo	4297	4310	LQFVTGTSKVPLQG	12	1473.82	4.94893	0	100	2.6466	0.047604	22.055	0.3967
Apo	4297	4310	LQFVTGTSKVPLQG	12	1473.82	4.98837	0.008674	1000	3.63172	0.091893	30.2643	0.765775
BI8622	4298	4305	QFVTGTSK	7	866.449	4.22478	0.028171	0	0	0	0	0
BI8622	4298	4305	QFVTGTSK	7	866.449	4.46062	0.126063	10	0.161915	0.029932	2.31307	0.4276
BI8622	4298	4305	QFVTGTSK	7	866.449	4.26012	0.047352	30	0.23667	0.003839	3.381	0.0548429
BI8622	4298	4305	QFVTGTSK	7	866.449	4.17261	0.006248	100	0.338318	0.003876	4.83311	0.0553714
BI8622	4298	4305	QFVTGTSK	7	866.449	4.21975	0.008932	1000	0.895365	0.076832	12.7909	1.0976
BI8626	4298	4305	QFVTGTSK	7	866.449	4.2444	0.015752	0	0	0	0	0
BI8626	4298	4305	QFVTGTSK	7	866.449	4.38804	0.037126	10	0.193756	0.049153	2.76794	0.702186
BI8626	4298	4305	QFVTGTSK	7	866.449	4.3142	0.020371	30	0.17587	0.03338	2.51243	0.476857
BI8626	4298	4305	QFVTGTSK	7	866.449	4.22612	0	100	0.358446	0.027541	5.12066	0.393443
BI8626	4298	4305	QFVTGTSK	7	866.449	4.21849	0	1000	0.789369	0.027541	11.2767	0.393443
Apo	4298	4305	QFVTGTSK	7	866.449	4.19296	0.02191	0	0	0	0	0
Apo	4298	4305	QFVTGTSK	7	866.449	4.29063	0.083222	10	0.18931	0.025408	2.70443	0.362971
Apo	4298	4305	QFVTGTSK	7	866.449	4.39718	0.031227	30	0.182174	0.029001	2.60249	0.4143
Apo	4298	4305	QFVTGTSK	7	866.449	4.20678	0	100	0.308187	0.024213	4.40267	0.3459
Apo	4298	4305	QFVTGTSK	7	866.449	4.24422	0.032551	1000	0.827503	0.02765	11.8215	0.395
BI8622	4298	4311	QFVTGTSKVPLQGF	12	1507.8	5.1572	0.096071	0	0	0	0	0
BI8622	4298	4311	QFVTGTSKVPLQGF	12	1507.8	5.35868	0.100869	10	2.07685	0.132743	17.3071	1.10619
BI8622	4298	4311	QFVTGTSKVPLQGF	12	1507.8	5.2458	0.039793	30	2.54881	0.025113	21.2401	0.209275
BI8622	4298	4311	QFVTGTSKVPLQGF	12	1507.8	5.19856	0.004805	100	3.2481	0.12399	27.0675	1.03325
BI8622	4298	4311	QFVTGTSKVPLQGF	12	1507.8	5.20585	0.003153	1000	4.30336	0.078794	35.8614	0.656617
BI8626	4298	4311	QFVTGTSKVPLQGF	12	1507.8	5.20971	0.099718	0	0	0	0	0
BI8626	4298	4311	QFVTGTSKVPLQGF	12	1507.8	5.31845	0.020712	10	1.93325	0.076356	16.1105	0.6363
BI8626	4298	4311	QFVTGTSKVPLQGF	12	1507.8	5.26214	0.006779	30	2.39056	0.082169	19.9213	0.684742
BI8626	4298	4311	QFVTGTSKVPLQGF	12	1507.8	5.21809	0	100	2.93568	0.075258	24.464	0.62715
BI8626	4298	4311	QFVTGTSKVPLQGF	12	1507.8	5.2394	0.002461	1000	4.14163	0.076238	34.5136	0.635317
Apo	4298	4311	QFVTGTSKVPLQGF	12	1507.8	5.09555	0.093229	0	0	0	0	0
Apo	4298	4311	QFVTGTSKVPLQGF	12	1507.8	5.25602	0.061528	10	1.97429	0.032143	16.4524	0.267858
Apo	4298	4311	QFVTGTSKVPLQGF	12	1507.8	5.33699	0.016214	30	2.38763	0.070655	19.8969	0.588792
Apo	4298	4311	QFVTGTSKVPLQGF	12	1507.8	5.20819	0	100	3.16146	0.025923	26.3455	0.216025
Apo	4298	4311	QFVTGTSKVPLQGF	12	1507.8	5.22989	0.013671	1000	4.22209	0.026063	35.1841	0.217192
BI8622	4299	4305	FVTGTSK	6	738.391	3.97458	0.013528	0	0	0	0	0
BI8622	4299	4305	FVTGTSK	6	738.391	4.24288	0.104775	10	0.161788	0.024422	2.69647	0.407033
BI8622	4299	4305	FVTGTSK	6	738.391	4.00495	0.04957	30	0.226767	0.014536	3.77945	0.242267
BI8622	4299	4305	FVTGTSK	6	738.391	3.77136	0.01011	100	0.316985	0.036434	5.28308	0.607233
BI8622	4299	4305	FVTGTSK	6	738.391	3.97432	0.004529	1000	0.876207	0.098357	14.6034	1.63928
BI8626	4299	4305	FVTGTSK	6	738.391	3.99874	0.015683	0	0	0	0	0
BI8626	4299	4305	FVTGTSK	6	738.391	4.17495	0.038707	10	0.179479	0.052381	2.99132	0.873017
BI8626	4299	4305	FVTGTSK	6	738.391	4.07392	0.017254	30	0.20838	0.015636	3.473	0.2606
BI8626	4299	4305	FVTGTSK	6	738.391	3.83503	0	100	0.320604	0.012539	5.3434	0.208983
BI8626	4299	4305	FVTGTSK	6	738.391	3.96568	0.0113	1000	0.819695	0.023382	13.6616	0.3897
Apo	4299	4305	FVTGTSK	6	738.391	3.9453	0.015631	0	0	0	0	0
Apo	4299	4305	FVTGTSK	6	738.391	4.04929	0.098624	10	0.160468	0.021916	2.67447	0.365267
Apo	4299	4305	FVTGTSK	6	738.391	4.17888	0.041415	30	0.180154	0.026383	3.00257	0.439717
Apo	4299	4305	FVTGTSK	6	738.391	3.8514	0	100	0.253001	0.020707	4.21668	0.345117
Apo	4299	4305	FVTGTSK	6	738.391	4.00462	0.041422	1000	0.845287	0.040514	14.0881	0.675233
BI8622	4299	4311	FVTGTSKVPLQGF	11	1379.74	5.1256	0.095848	0	0	0	0	0
BI8622	4299	4311	FVTGTSKVPLQGF	11	1379.74	5.41043	0.150036	10	2.05426	0.081335	18.6751	0.739409
BI8622	4299	4311	FVTGTSKVPLQGF	11	1379.74	5.2323	0.042157	30	2.47185	0.041845	22.4713	0.380409
BI8622	4299	4311	FVTGTSKVPLQGF	11	1379.74	5.16065	0.002666	100	3.20869	0.037898	29.1699	0.344527
BI8622	4299	4311	FVTGTSKVPLQGF	11	1379.74	5.17452	0.002198	1000	4.18501	0.07221	38.0455	0.656455
BI8626	4299	4311	FVTGTSKVPLQGF	11	1379.74	5.14461	0.098082	0	0	0	0	0
BI8626	4299	4311	FVTGTSKVPLQGF	11	1379.74	5.2697	0.023433	10	2.09005	0.084024	19.0005	0.763855
BI8626	4299	4311	FVTGTSKVPLQGF	11	1379.74	5.23912	0.006883	30	2.41693	0.080016	21.9721	0.727418
BI8626	4299	4311	FVTGTSKVPLQGF	11	1379.74	5.18417	0	100	3.15754	0.070248	28.7049	0.638618
BI8626	4299	4311	FVTGTSKVPLQGF	11	1379.74	5.19245	0.007018	1000	4.20593	0.102769	38.2357	0.934264
Apo	4299	4311	FVTGTSKVPLQGF	11	1379.74	5.05827	0.082735	0	0	0	0	0
Apo	4299	4311	FVTGTSKVPLQGF	11	1379.74	5.23874	0.068157	10	2.18853	0.107813	19.8957	0.980118
Apo	4299	4311	FVTGTSKVPLQGF	11	1379.74	5.29121	0.011259	30	2.53523	0.105615	23.0475	0.960136
Apo	4299	4311	FVTGTSKVPLQGF	11	1379.74	5.17434	0	100	3.22817	0.101809	29.347	0.925536
Apo	4299	4311	FVTGTSKVPLQGF	11	1379.74	5.20932	0.009209	1000	4.24198	0.143343	38.5634	1.30312
BI8622	4300	4310	VTGTSKVPLQG	9	1085.61	4.32022	0.026733	0	0	0	0	0
BI8622	4300	4310	VTGTSKVPLQG	9	1085.61	4.56633	0.128497	10	1.56411	0.089261	17.379	0.991789
BI8622	4300	4310	VTGTSKVPLQG	9	1085.61	4.35354	0.042716	30	1.90048	0.029974	21.1164	0.333044
BI8622	4300	4310	VTGTSKVPLQG	9	1085.61	4.27815	0.002786	100	2.43362	0.031746	27.0402	0.352733
BI8622	4300	4310	VTGTSKVPLQG	9	1085.61	4.31653	0.00775	1000	3.48851	0.042351	38.7612	0.470567
BI8626	4300	4310	VTGTSKVPLQG	9	1085.61	4.34235	0.01824	0	0	0	0	0
BI8626	4300	4310	VTGTSKVPLQG	9	1085.61	4.47523	0.035608	10	1.56057	0.044228	17.3397	0.491422
BI8626	4300	4310	VTGTSKVPLQG	9	1085.61	4.40648	0.017173	30	1.81169	0.051304	20.1299	0.570044
BI8626	4300	4310	VTGTSKVPLQG	9	1085.61	4.32322	0	100	2.26681	0.038759	25.1867	0.430656
BI8626	4300	4310	VTGTSKVPLQG	9	1085.61	4.32899	0.023663	1000	3.43532	0.078887	38.1702	0.876522
Apo	4300	4310	VTGTSKVPLQG	9	1085.61	4.29445	0.022075	0	0	0	0	0
Apo	4300	4310	VTGTSKVPLQG	9	1085.61	4.38953	0.08248	10	1.55137	0.079974	17.2374	0.8886
Apo	4300	4310	VTGTSKVPLQG	9	1085.61	4.48971	0.03174	30	1.79926	0.081219	19.9918	0.902433
Apo	4300	4310	VTGTSKVPLQG	9	1085.61	4.31275	0	100	2.38787	0.070838	26.5319	0.787089
Apo	4300	4310	VTGTSKVPLQG	9	1085.61	4.34825	0.028014	1000	3.46046	0.086408	38.4496	0.960089
BI8622	4300	4311	VTGTSKVPLQGF	10	1232.68	5.01616	0.082664	0	0	0	0	0
BI8622	4300	4311	VTGTSKVPLQGF	10	1232.68	5.28849	0.140636	10	2.14593	0.08158	21.4593	0.8158
BI8622	4300	4311	VTGTSKVPLQGF	10	1232.68	5.08718	0.043591	30	2.61322	0.006603	26.1322	0.06603
BI8622	4300	4311	VTGTSKVPLQGF	10	1232.68	5.00958	0.000427	100	3.38442	0.010376	33.8442	0.10376
BI8622	4300	4311	VTGTSKVPLQGF	10	1232.68	5.0294	0.004944	1000	4.33975	0.015665	43.3975	0.15665
BI8626	4300	4311	VTGTSKVPLQGF	10	1232.68	5.02948	0.089678	0	0	0	0	0
BI8626	4300	4311	VTGTSKVPLQGF	10	1232.68	5.14863	0.031449	10	2.18107	0.040632	21.8107	0.40632
BI8626	4300	4311	VTGTSKVPLQGF	10	1232.68	5.1055	0.008875	30	2.53152	0.025787	25.3152	0.25787
BI8626	4300	4311	VTGTSKVPLQGF	10	1232.68	5.04276	0	100	3.28929	0.012939	32.8929	0.12939
BI8626	4300	4311	VTGTSKVPLQGF	10	1232.68	5.05335	0.001747	1000	4.30968	0.01591	43.0968	0.1591
Apo	4300	4311	VTGTSKVPLQGF	10	1232.68	4.94477	0.067377	0	0	0	0	0
Apo	4300	4311	VTGTSKVPLQGF	10	1232.68	5.11422	0.079657	10	2.22741	0.036287	22.2741	0.36287
Apo	4300	4311	VTGTSKVPLQGF	10	1232.68	5.1666	0.017581	30	2.57973	0.025715	25.7973	0.25715
Apo	4300	4311	VTGTSKVPLQGF	10	1232.68	5.02844	0	100	3.30943	0.01682	33.0943	0.1682
Apo	4300	4311	VTGTSKVPLQGF	10	1232.68	5.06415	0.014437	1000	4.32392	0.057407	43.2392	0.57407
BI8622	4300	4313	VTGTSKVPLQGFAA	12	1374.75	4.94098	0.071549	0	0	0	0	0
BI8622	4300	4313	VTGTSKVPLQGFAA	12	1374.75	5.13597	0.079919	10	2.93982	0.145976	24.4985	1.21647
BI8622	4300	4313	VTGTSKVPLQGFAA	12	1374.75	5.00113	0.044773	30	3.65279	0.040596	30.4399	0.3383
BI8622	4300	4313	VTGTSKVPLQGFAA	12	1374.75	4.93102	0.000733	100	4.33447	0.042863	36.1206	0.357192
BI8622	4300	4313	VTGTSKVPLQGFAA	12	1374.75	4.94067	0.002441	1000	5.76023	0.12628	48.0019	1.05233
BI8626	4300	4313	VTGTSKVPLQGFAA	12	1374.75	5.00183	0.07581	0	0	0	0	0
BI8626	4300	4313	VTGTSKVPLQGFAA	12	1374.75	5.09965	0.021344	10	2.88237	0.115159	24.0198	0.959658
BI8626	4300	4313	VTGTSKVPLQGFAA	12	1374.75	5.01776	0.00524	30	3.48317	0.09559	29.0264	0.796583
BI8626	4300	4313	VTGTSKVPLQGFAA	12	1374.75	4.94785	0	100	4.17193	0.086447	34.7661	0.720392
BI8626	4300	4313	VTGTSKVPLQGFAA	12	1374.75	4.95646	0	1000	5.75469	0.086447	47.9558	0.720392
Apo	4300	4313	VTGTSKVPLQGFAA	12	1374.75	4.89634	0.065474	0	0	0	0	0
Apo	4300	4313	VTGTSKVPLQGFAA	12	1374.75	5.01764	0.066074	10	2.82412	0.086288	23.5343	0.719067
Apo	4300	4313	VTGTSKVPLQGFAA	12	1374.75	5.11092	0.017278	30	3.517	0.102743	29.3083	0.856192
Apo	4300	4313	VTGTSKVPLQGFAA	12	1374.75	4.95477	0	100	4.4335	0.043787	36.9459	0.364892
Apo	4300	4313	VTGTSKVPLQGFAA	12	1374.75	4.96988	0.01595	1000	5.77927	0.043919	48.1605	0.365992
BI8622	4300	4314	VTGTSKVPLQGFAAL	13	1487.83	5.29578	0.112525	0	0	0	0	0
BI8622	4300	4314	VTGTSKVPLQGFAAL	13	1487.83	5.56134	0.134108	10	2.96935	0.183929	22.8411	1.41484
BI8622	4300	4314	VTGTSKVPLQGFAAL	13	1487.83	5.4365	0.038108	30	3.65573	0.06284	28.121	0.483385
BI8622	4300	4314	VTGTSKVPLQGFAAL	13	1487.83	5.38714	0.005554	100	4.35049	0.075654	33.4653	0.581954
BI8622	4300	4314	VTGTSKVPLQGFAAL	13	1487.83	5.39142	0.001967	1000	5.8977	0.268604	45.3669	2.06618
[truncated: 562 more rows]

## Sheet: Exp1_HDX_Residues
Apo	Deuterium uptake (%)					BI8622	Deuterium uptake (%)					BI8626	Deuterium uptake (%)					BI8622 versus Apo	Difference in deuterium uptake (%)						BI8626 versus Apo	Difference in deuterium uptake (%)
	HDX time (s)						HDX time (s)						HDX time (s)						HDX time (s)				Maximal diff.			HDX time (s)				Maximal diff.
Residue	10	30	100	1000	Maximal	Residue	10	30	100	1000	Maximal	Residue	10	30	100	1000	Maximal	Residue	10	30	100	1000	Lowest	Highest	Residue	10	30	100	1000	Lowest	Highest
3991						3991						3991						3991							3991
3992	11.4	13.2	16.1	28.7	28.7	3992	9.8	11.3	16.6	28	28	3992	11.3	12.8	17.1	28.5	28.5	3992	-1.6	-1.9	0.5	-0.7	-1.9	0.5	3992	-0.1	-0.4	1	-0.2	-0.4	1
3993	11.4	13.2	16.1	28.7	28.7	3993	9.8	11.3	16.6	28	28	3993	11.3	12.8	17.1	28.5	28.5	3993	-1.6	-1.9	0.5	-0.7	-1.9	0.5	3993	-0.1	-0.4	1	-0.2	-0.4	1
3994	11.4	13.2	16.1	28.7	28.7	3994	9.8	11.3	16.6	28	28	3994	11.3	12.8	17.1	28.5	28.5	3994	-1.6	-1.9	0.5	-0.7	-1.9	0.5	3994	-0.1	-0.4	1	-0.2	-0.4	1
3995	8.4	12.8	19.9	37.5	37.5	3995	9.7	14.7	20.1	37.8	37.8	3995	8.9	13.9	16.9	37	37	3995	1.3	1.9	0.2	0.3	0.2	1.9	3995	0.5	1.1	-3	-0.5	-3	1.1
3996	8.4	12.8	19.9	37.5	37.5	3996	9.7	14.7	20.1	37.8	37.8	3996	8.9	13.9	16.9	37	37	3996	1.3	1.9	0.2	0.3	0.2	1.9	3996	0.5	1.1	-3	-0.5	-3	1.1
3997	8.4	12.8	19.9	37.5	37.5	3997	9.7	14.7	20.1	37.8	37.8	3997	8.9	13.9	16.9	37	37	3997	1.3	1.9	0.2	0.3	0.2	1.9	3997	0.5	1.1	-3	-0.5	-3	1.1
3998	8.4	12.8	19.9	37.5	37.5	3998	9.7	14.7	20.1	37.8	37.8	3998	8.9	13.9	16.9	37	37	3998	1.3	1.9	0.2	0.3	0.2	1.9	3998	0.5	1.1	-3	-0.5	-3	1.1
3999	8.4	12.8	19.9	37.5	37.5	3999	9.7	14.7	20.1	37.8	37.8	3999	8.9	13.9	16.9	37	37	3999	1.3	1.9	0.2	0.3	0.2	1.9	3999	0.5	1.1	-3	-0.5	-3	1.1
4000	2.5	2.3	6.2	15.1	15.1	4000	1.9	1.3	6	14.8	14.8	4000	1.1	0.5	4.2	13.2	13.2	4000	-0.6	-1	-0.2	-0.3	-1	-0.2	4000	-1.4	-1.8	-2	-1.9	-2	-1.4
4001	2.4	1.6	1.8	8.3	8.3	4001	1.5	3.5	3.2	9.5	9.5	4001	3	2.7	4.5	9	9	4001	-0.9	1.9	1.4	1.2	-0.9	1.9	4001	0.6	1.1	2.7	0.7	0.6	2.7
4002	2.4	1.6	1.8	8.3	8.3	4002	1.5	3.5	3.2	9.5	9.5	4002	3	2.7	4.5	9	9	4002	-0.9	1.9	1.4	1.2	-0.9	1.9	4002	0.6	1.1	2.7	0.7	0.6	2.7
4003	2.4	1.6	1.8	8.3	8.3	4003	1.5	3.5	3.2	9.5	9.5	4003	3	2.7	4.5	9	9	4003	-0.9	1.9	1.4	1.2	-0.9	1.9	4003	0.6	1.1	2.7	0.7	0.6	2.7
4004	2.4	1.6	1.8	8.3	8.3	4004	1.5	3.5	3.2	9.5	9.5	4004	3	2.7	4.5	9	9	4004	-0.9	1.9	1.4	1.2	-0.9	1.9	4004	0.6	1.1	2.7	0.7	0.6	2.7
4005	2.5	2.3	6.2	15.1	15.1	4005	1.9	1.3	6	14.8	14.8	4005	1.1	0.5	4.2	13.2	13.2	4005	-0.6	-1	-0.2	-0.3	-1	-0.2	4005	-1.4	-1.8	-2	-1.9	-2	-1.4
4006	7.7	13	26.3	43	43	4006	9	16.5	25.7	44.6	44.6	4006	8.4	14.2	23.5	43.5	43.5	4006	1.3	3.5	-0.6	1.6	-0.6	3.5	4006	0.7	1.2	-2.8	0.5	-2.8	1.2
4007	7.7	13	26.3	43	43	4007	9	16.5	25.7	44.6	44.6	4007	8.4	14.2	23.5	43.5	43.5	4007	1.3	3.5	-0.6	1.6	-0.6	3.5	4007	0.7	1.2	-2.8	0.5	-2.8	1.2
4008	7.7	13	26.3	43	43	4008	9	16.5	25.7	44.6	44.6	4008	8.4	14.2	23.5	43.5	43.5	4008	1.3	3.5	-0.6	1.6	-0.6	3.5	4008	0.7	1.2	-2.8	0.5	-2.8	1.2
4009	14.6	19.3	28.8	41.3	41.3	4009	15.9	21.2	30.2	42.5	42.5	4009	15.2	19.7	27.2	42	42	4009	1.3	1.9	1.4	1.2	1.2	1.9	4009	0.6	0.4	-1.6	0.7	-1.6	0.7
4010	39.3	41.3	43.6	43.9	43.9	4010	40.8	43.2	43.6	45.1	45.1	4010	39.7	41.8	42.8	42.6	42.8	4010	1.5	1.9	0	1.2	0	1.9	4010	0.4	0.5	-0.8	-1.3	-1.3	0.5
4011	39.3	41.3	43.6	43.9	43.9	4011	40.8	43.2	43.6	45.1	45.1	4011	39.7	41.8	42.8	42.6	42.8	4011	1.5	1.9	0	1.2	0	1.9	4011	0.4	0.5	-0.8	-1.3	-1.3	0.5
4012	39.3	41.3	43.6	43.9	43.9	4012	40.8	43.2	43.6	45.1	45.1	4012	39.7	41.8	42.8	42.6	42.8	4012	1.5	1.9	0	1.2	0	1.9	4012	0.4	0.5	-0.8	-1.3	-1.3	0.5
4013	16.8	17.9	15.1	16.8	17.9	4013	17.3	18.1	15.9	17.5	18.1	4013	15.8	16.7	16.5	17.1	17.1	4013	0.5	0.2	0.8	0.7	0.2	0.8	4013	-1	-1.2	1.4	0.3	-1.2	1.4
4014	16.8	17.9	15.1	16.8	17.9	4014	17.3	18.1	15.9	17.5	18.1	4014	15.8	16.7	16.5	17.1	17.1	4014	0.5	0.2	0.8	0.7	0.2	0.8	4014	-1	-1.2	1.4	0.3	-1.2	1.4
4015	16.8	17.9	15.1	16.8	17.9	4015	17.3	18.1	15.9	17.5	18.1	4015	15.8	16.7	16.5	17.1	17.1	4015	0.5	0.2	0.8	0.7	0.2	0.8	4015	-1	-1.2	1.4	0.3	-1.2	1.4
4016	16.8	17.9	15.1	16.8	17.9	4016	17.3	18.1	15.9	17.5	18.1	4016	15.8	16.7	16.5	17.1	17.1	4016	0.5	0.2	0.8	0.7	0.2	0.8	4016	-1	-1.2	1.4	0.3	-1.2	1.4
4017	31.2	31.2	37.2	41.1	41.1	4017	30.6	31.3	38.7	40.9	40.9	4017	31.1	29.8	37.8	39.6	39.6	4017	-0.6	0.1	1.5	-0.2	-0.6	1.5	4017	-0.1	-1.4	0.6	-1.5	-1.5	0.6
4018	2.1	1.3	4.8	8.4	8.4	4018	2.8	4.3	5.2	8.6	8.6	4018	2.8	2.9	4.6	7.7	7.7	4018	0.7	3	0.4	0.2	0.2	3	4018	0.7	1.6	-0.2	-0.7	-0.7	1.6
4019	2.1	1.3	4.8	8.4	8.4	4019	2.8	4.3	5.2	8.6	8.6	4019	2.8	2.9	4.6	7.7	7.7	4019	0.7	3	0.4	0.2	0.2	3	4019	0.7	1.6	-0.2	-0.7	-0.7	1.6
4020	2.1	1.3	4.8	8.4	8.4	4020	2.8	4.3	5.2	8.6	8.6	4020	2.8	2.9	4.6	7.7	7.7	4020	0.7	3	0.4	0.2	0.2	3	4020	0.7	1.6	-0.2	-0.7	-0.7	1.6
4021	2.1	1.3	4.8	8.4	8.4	4021	2.8	4.3	5.2	8.6	8.6	4021	2.8	2.9	4.6	7.7	7.7	4021	0.7	3	0.4	0.2	0.2	3	4021	0.7	1.6	-0.2	-0.7	-0.7	1.6
4022	2.9	2.8	5	6.6	6.6	4022	2.4	3.7	5.3	7.5	7.5	4022	2.9	3.4	5.3	5.5	5.5	4022	-0.5	0.9	0.3	0.9	-0.5	0.9	4022	0	0.6	0.3	-1.1	-1.1	0.6
4023	15.2	16.6	18.5	20.2	20.2	4023	12.6	14.8	18.5	19.8	19.8	4023	14.4	14.2	19.6	20.6	20.6	4023	-2.6	-1.8	0	-0.4	-2.6	0	4023	-0.8	-2.4	1.1	0.4	-2.4	1.1
4024	15.2	16.6	18.5	20.2	20.2	4024	12.6	14.8	18.5	19.8	19.8	4024	14.4	14.2	19.6	20.6	20.6	4024	-2.6	-1.8	0	-0.4	-2.6	0	4024	-0.8	-2.4	1.1	0.4	-2.4	1.1
4025	27.9		33	33.8	33.8	4025	29.3	30.8	31.4	33.6	33.6	4025	27.2	30.7	31.5	33.2	33.2	4025	1.4		-1.6	-0.2	-1.6	1.4	4025	-0.7		-1.5	-0.6	-1.5	-0.6
4026	27.9		33	33.8	33.8	4026	29.3	30.8	31.4	33.6	33.6	4026	27.2	30.7	31.5	33.2	33.2	4026	1.4		-1.6	-0.2	-1.6	1.4	4026	-0.7		-1.5	-0.6	-1.5	-0.6
4027	27.9		33	33.8	33.8	4027	29.3	30.8	31.4	33.6	33.6	4027	27.2	30.7	31.5	33.2	33.2	4027	1.4		-1.6	-0.2	-1.6	1.4	4027	-0.7		-1.5	-0.6	-1.5	-0.6
4028	27.9		33	33.8	33.8	4028	29.3	30.8	31.4	33.6	33.6	4028	27.2	30.7	31.5	33.2	33.2	4028	1.4		-1.6	-0.2	-1.6	1.4	4028	-0.7		-1.5	-0.6	-1.5	-0.6
4029	16.8	18.3	21.5	24.6	24.6	4029	16.7	19.9	20.6	24.9	24.9	4029	16.7	19	19.6	24.4	24.4	4029	-0.1	1.6	-0.9	0.3	-0.9	1.6	4029	-0.1	0.7	-1.9	-0.2	-1.9	0.7
4030	3.1	1.9	1.8	3.1	3.1	4030	2	2.6	3.4	3.2	3.4	4030	2.9	2.2	2.8	1.8	2.9	4030	-1.1	0.7	1.6	0.1	-1.1	1.6	4030	-0.2	0.3	1	-1.3	-1.3	1
4031	3.1	1.9	1.8	3.1	3.1	4031	2	2.6	3.4	3.2	3.4	4031	2.9	2.2	2.8	1.8	2.9	4031	-1.1	0.7	1.6	0.1	-1.1	1.6	4031	-0.2	0.3	1	-1.3	-1.3	1
4032	3.1	1.9	1.8	3.1	3.1	4032	2	2.6	3.4	3.2	3.4	4032	2.9	2.2	2.8	1.8	2.9	4032	-1.1	0.7	1.6	0.1	-1.1	1.6	4032	-0.2	0.3	1	-1.3	-1.3	1
4033	3.3	3.3	3.4	7.1	7.1	4033	3.6	3.8	5	8.3	8.3	4033	4.3	3.6	4.9	6.6	6.6	4033	0.3	0.5	1.6	1.2	0.3	1.6	4033	1	0.3	1.5	-0.5	-0.5	1.5
4034	3.3	3.3	3.4	7.1	7.1	4034	3.6	3.8	5	8.3	8.3	4034	4.3	3.6	4.9	6.6	6.6	4034	0.3	0.5	1.6	1.2	0.3	1.6	4034	1	0.3	1.5	-0.5	-0.5	1.5
4035	16	16.2	16.7	20	20	4035	13.9	15.2	17.3	20.1	20.1	4035	15.1	14.8	17.5	21.9	21.9	4035	-2.1	-1	0.6	0.1	-2.1	0.6	4035	-0.9	-1.4	0.8	1.9	-1.4	1.9
4036	11.8	12	13.5	16.7	16.7	4036	12.4	13.6	12.5	18.2	18.2	4036	12.3	12.5	14.2	15.6	15.6	4036	0.6	1.6	-1	1.5	-1	1.6	4036	0.5	0.5	0.7	-1.1	-1.1	0.7
4037	11.8	12	13.5	16.7	16.7	4037	12.4	13.6	12.5	18.2	18.2	4037	12.3	12.5	14.2	15.6	15.6	4037	0.6	1.6	-1	1.5	-1	1.6	4037	0.5	0.5	0.7	-1.1	-1.1	0.7
4038	11.8	12	13.5	16.7	16.7	4038	12.4	13.6	12.5	18.2	18.2	4038	12.3	12.5	14.2	15.6	15.6	4038	0.6	1.6	-1	1.5	-1	1.6	4038	0.5	0.5	0.7	-1.1	-1.1	0.7
4039	11.8	12	13.5	16.7	16.7	4039	12.4	13.6	12.5	18.2	18.2	4039	12.3	12.5	14.2	15.6	15.6	4039	0.6	1.6	-1	1.5	-1	1.6	4039	0.5	0.5	0.7	-1.1	-1.1	0.7
4040	11.8	12	13.5	16.7	16.7	4040	12.4	13.6	12.5	18.2	18.2	4040	12.3	12.5	14.2	15.6	15.6	4040	0.6	1.6	-1	1.5	-1	1.6	4040	0.5	0.5	0.7	-1.1	-1.1	0.7
4041	11.8	12	13.5	16.7	16.7	4041	12.4	13.6	12.5	18.2	18.2	4041	12.3	12.5	14.2	15.6	15.6	4041	0.6	1.6	-1	1.5	-1	1.6	4041	0.5	0.5	0.7	-1.1	-1.1	0.7
4042	11.8	12	13.5	16.7	16.7	4042	12.4	13.6	12.5	18.2	18.2	4042	12.3	12.5	14.2	15.6	15.6	4042	0.6	1.6	-1	1.5	-1	1.6	4042	0.5	0.5	0.7	-1.1	-1.1	0.7
4043	4.3	5.7	14.4	30	30	4043	2.1	6.3	13.9	30.2	30.2	4043	5.1	6.4	17.2	29.7	29.7	4043	-2.2	0.6	-0.5	0.2	-2.2	0.6	4043	0.8	0.7	2.8	-0.3	-0.3	2.8
4044	4.3	5.7	14.4	30	30	4044	2.1	6.3	13.9	30.2	30.2	4044	5.1	6.4	17.2	29.7	29.7	4044	-2.2	0.6	-0.5	0.2	-2.2	0.6	4044	0.8	0.7	2.8	-0.3	-0.3	2.8
4045	2.5	3.3	9.9	19.1	19.1	4045	0.8	4.7	8.9	19.5	19.5	4045	2.4	4.8	7.9	20.1	20.1	4045	-1.7	1.4	-1	0.4	-1.7	1.4	4045	-0.1	1.5	-2	1	-2	1.5
4046	2.5	3.3	9.9	19.1	19.1	4046	0.8	4.7	8.9	19.5	19.5	4046	2.4	4.8	7.9	20.1	20.1	4046	-1.7	1.4	-1	0.4	-1.7	1.4	4046	-0.1	1.5	-2	1	-2	1.5
4047	2.5	3.3	9.9	19.1	19.1	4047	0.8	4.7	8.9	19.5	19.5	4047	2.4	4.8	7.9	20.1	20.1	4047	-1.7	1.4	-1	0.4	-1.7	1.4	4047	-0.1	1.5	-2	1	-2	1.5
4048	2.4	4.5	12.6	18.7	18.7	4048	0.3	2.8	10.2	19.5	19.5	4048	1.5	3.8	11	17.6	17.6	4048	-2.1	-1.7	-2.4	0.8	-2.4	0.8	4048	-0.9	-0.7	-1.6	-1.1	-1.6	-0.7
4049	2.4	4.5	12.6	18.7	18.7	4049	0.3	2.8	10.2	19.5	19.5	4049	1.5	3.8	11	17.6	17.6	4049	-2.1	-1.7	-2.4	0.8	-2.4	0.8	4049	-0.9	-0.7	-1.6	-1.1	-1.6	-0.7
4050	2.4	4.5	12.6	18.7	18.7	4050	0.3	2.8	10.2	19.5	19.5	4050	1.5	3.8	11	17.6	17.6	4050	-2.1	-1.7	-2.4	0.8	-2.4	0.8	4050	-0.9	-0.7	-1.6	-1.1	-1.6	-0.7
4051						4051						4051						4051							4051
4052	39.7	39.7	39.3	40.4	40.4	4052	38.3	39.1	39.8	39.5	39.8	4052	40.5	39.6	40.4	39.9	40.5	4052	-1.4	-0.6	0.5	-0.9	-1.4	0.5	4052	0.8	-0.1	1.1	-0.5	-0.5	1.1
4053	39.7	39.7	39.3	40.4	40.4	4053	38.3	39.1	39.8	39.5	39.8	4053	40.5	39.6	40.4	39.9	40.5	4053	-1.4	-0.6	0.5	-0.9	-1.4	0.5	4053	0.8	-0.1	1.1	-0.5	-0.5	1.1
4054	39.7	39.7	39.3	40.4	40.4	4054	38.3	39.1	39.8	39.5	39.8	4054	40.5	39.6	40.4	39.9	40.5	4054	-1.4	-0.6	0.5	-0.9	-1.4	0.5	4054	0.8	-0.1	1.1	-0.5	-0.5	1.1
4055	39.7	39.7	39.3	40.4	40.4	4055	38.3	39.1	39.8	39.5	39.8	4055	40.5	39.6	40.4	39.9	40.5	4055	-1.4	-0.6	0.5	-0.9	-1.4	0.5	4055	0.8	-0.1	1.1	-0.5	-0.5	1.1
4056	39.7	39.7	39.3	40.4	40.4	4056	38.3	39.1	39.8	39.5	39.8	4056	40.5	39.6	40.4	39.9	40.5	4056	-1.4	-0.6	0.5	-0.9	-1.4	0.5	4056	0.8	-0.1	1.1	-0.5	-0.5	1.1
4057	39.7	39.7	39.3	40.4	40.4	4057	38.3	39.1	39.8	39.5	39.8	4057	40.5	39.6	40.4	39.9	40.5	4057	-1.4	-0.6	0.5	-0.9	-1.4	0.5	4057	0.8	-0.1	1.1	-0.5	-0.5	1.1
4058	37.6	39	36.9	37.9	39	4058	38	39.9	36.6	36.2	39.9	4058	37.5	38.9	37.7	38.6	38.9	4058	0.4	0.9	-0.3	-1.7	-1.7	0.9	4058	-0.1	-0.1	0.8	0.7	-0.1	0.8
4059	37.6	39	36.9	37.9	39	4059	38	39.9	36.6	36.2	39.9	4059	37.5	38.9	37.7	38.6	38.9	4059	0.4	0.9	-0.3	-1.7	-1.7	0.9	4059	-0.1	-0.1	0.8	0.7	-0.1	0.8
4060	37.6	39	36.9	37.9	39	4060	38	39.9	36.6	36.2	39.9	4060	37.5	38.9	37.7	38.6	38.9	4060	0.4	0.9	-0.3	-1.7	-1.7	0.9	4060	-0.1	-0.1	0.8	0.7	-0.1	0.8
4061	37.6	39	36.9	37.9	39	4061	38	39.9	36.6	36.2	39.9	4061	37.5	38.9	37.7	38.6	38.9	4061	0.4	0.9	-0.3	-1.7	-1.7	0.9	4061	-0.1	-0.1	0.8	0.7	-0.1	0.8
4062	21.1	25.6	34.1	48.7	48.7	4062	20.3	26.2	34.1	48.6	48.6	4062	20.1	24.9	36.2	47.5	47.5	4062	-0.8	0.6	0	-0.1	-0.8	0.6	4062	-1	-0.7	2.1	-1.2	-1.2	2.1
4063	21.1	25.6	34.1	48.7	48.7	4063	20.3	26.2	34.1	48.6	48.6	4063	20.1	24.9	36.2	47.5	47.5	4063	-0.8	0.6	0	-0.1	-0.8	0.6	4063	-1	-0.7	2.1	-1.2	-1.2	2.1
4064	21.1	25.6	34.1	48.7	48.7	4064	20.3	26.2	34.1	48.6	48.6	4064	20.1	24.9	36.2	47.5	47.5	4064	-0.8	0.6	0	-0.1	-0.8	0.6	4064	-1	-0.7	2.1	-1.2	-1.2	2.1
4065	21.1	25.6	34.1	48.7	48.7	4065	20.3	26.2	34.1	48.6	48.6	4065	20.1	24.9	36.2	47.5	47.5	4065	-0.8	0.6	0	-0.1	-0.8	0.6	4065	-1	-0.7	2.1	-1.2	-1.2	2.1
4066						4066						4066						4066							4066
4067						4067						4067						4067							4067
4068	-0.7	-0.9	-0.5	-0.6	-0.5	4068	-0.2	0.4	-1.6	0.4	0.4	4068	0.6	0	-2.1	0.5	0.6	4068	0.5	1.3	-1.1	1	-1.1	1.3	4068	1.3	0.9	-1.6	1.1	-1.6	1.3
4069	-0.7	-0.9	-0.5	-0.6	-0.5	4069	-0.2	0.4	-1.6	0.4	0.4	4069	0.6	0	-2.1	0.5	0.6	4069	0.5	1.3	-1.1	1	-1.1	1.3	4069	1.3	0.9	-1.6	1.1	-1.6	1.3
4070	-0.7	-0.9	-0.5	-0.6	-0.5	4070	-0.2	0.4	-1.6	0.4	0.4	4070	0.6	0	-2.1	0.5	0.6	4070	0.5	1.3	-1.1	1	-1.1	1.3	4070	1.3	0.9	-1.6	1.1	-1.6	1.3
4071	-0.7	-0.9	-0.5	-0.6	-0.5	4071	-0.2	0.4	-1.6	0.4	0.4	4071	0.6	0	-2.1	0.5	0.6	4071	0.5	1.3	-1.1	1	-1.1	1.3	4071	1.3	0.9	-1.6	1.1	-1.6	1.3
4072						4072						4072						4072							4072
4073	17.7	17.3	16.7	19.5	19.5	4073	16.6	18	15.9	18.9	18.9	4073	17.5	18.2	14.8	20.9	20.9	4073	-1.1	0.7	-0.8	-0.6	-1.1	0.7	4073	-0.2	0.9	-1.9	1.4	-1.9	1.4
4074	17.7	17.3	16.7	19.5	19.5	4074	16.6	18	15.9	18.9	18.9	4074	17.5	18.2	14.8	20.9	20.9	4074	-1.1	0.7	-0.8	-0.6	-1.1	0.7	4074	-0.2	0.9	-1.9	1.4	-1.9	1.4
4075	27.2	26.2	27.4	36.3	36.3	4075	26.1	27.7	26.8	36	36	4075	26.8	27.7	26.8	35.4	35.4	4075	-1.1	1.5	-0.6	-0.3	-1.1	1.5	4075	-0.4	1.5	-0.6	-0.9	-0.9	1.5
4076	27.2	26.2	27.4	36.3	36.3	4076	26.1	27.7	26.8	36	36	4076	26.8	27.7	26.8	35.4	35.4	4076	-1.1	1.5	-0.6	-0.3	-1.1	1.5	4076	-0.4	1.5	-0.6	-0.9	-0.9	1.5
4077	27.2	26.2	27.4	36.3	36.3	4077	26.1	27.7	26.8	36	36	4077	26.8	27.7	26.8	35.4	35.4	4077	-1.1	1.5	-0.6	-0.3	-1.1	1.5	4077	-0.4	1.5	-0.6	-0.9	-0.9	1.5
4078	27.2	26.2	27.4	36.3	36.3	4078	26.1	27.7	26.8	36	36	4078	26.8	27.7	26.8	35.4	35.4	4078	-1.1	1.5	-0.6	-0.3	-1.1	1.5	4078	-0.4	1.5	-0.6	-0.9	-0.9	1.5
4079	20.5	24	27.4	34.9	34.9	4079	18.2	21.9	26.2	32.9	32.9	4079	19.8	24.6	26.5	33.6	33.6	4079	-2.3	-2.1	-1.2	-2	-2.3	-1.2	4079	-0.7	0.6	-0.9	-1.3	-1.3	0.6
4080	20.5	24	27.4	34.9	34.9	4080	18.2	21.9	26.2	32.9	32.9	4080	19.8	24.6	26.5	33.6	33.6	4080	-2.3	-2.1	-1.2	-2	-2.3	-1.2	4080	-0.7	0.6	-0.9	-1.3	-1.3	0.6
4081						4081						4081						4081							4081
4082	18.8	18.4	22.2	33.7	33.7	4082	18.4	20.7	22.7	34.9	34.9	4082	18.3	20	21.1	34.5	34.5	4082	-0.4	2.3	0.5	1.2	-0.4	2.3	4082	-0.5	1.6	-1.1	0.8	-1.1	1.6
4083	18.8	18.4	22.2	33.7	33.7	4083	18.4	20.7	22.7	34.9	34.9	4083	18.3	20	21.1	34.5	34.5	4083	-0.4	2.3	0.5	1.2	-0.4	2.3	4083	-0.5	1.6	-1.1	0.8	-1.1	1.6
4084	18.8	18.4	22.2	33.7	33.7	4084	18.4	20.7	22.7	34.9	34.9	4084	18.3	20	21.1	34.5	34.5	4084	-0.4	2.3	0.5	1.2	-0.4	2.3	4084	-0.5	1.6	-1.1	0.8	-1.1	1.6
4085	18.8	18.4	22.2	33.7	33.7	4085	18.4	20.7	22.7	34.9	34.9	4085	18.3	20	21.1	34.5	34.5	4085	-0.4	2.3	0.5	1.2	-0.4	2.3	4085	-0.5	1.6	-1.1	0.8	-1.1	1.6
4086	23.5	25.2	30	36.5	36.5	4086	22.9	27.1	29.9	37.3	37.3	4086	22.7	25.4	28	37.5	37.5	4086	-0.6	1.9	-0.1	0.8	-0.6	1.9	4086	-0.8	0.2	-2	1	-2	1
4087	23.5	25.2	30	36.5	36.5	4087	22.9	27.1	29.9	37.3	37.3	4087	22.7	25.4	28	37.5	37.5	4087	-0.6	1.9	-0.1	0.8	-0.6	1.9	4087	-0.8	0.2	-2	1	-2	1
4088	23.5	25.2	30	36.5	36.5	4088	22.9	27.1	29.9	37.3	37.3	4088	22.7	25.4	28	37.5	37.5	4088	-0.6	1.9	-0.1	0.8	-0.6	1.9	4088	-0.8	0.2	-2	1	-2	1
4089	26.5	32	39.6	49.9	49.9	4089	27	32.2	39.4	50.2	50.2	4089	26.3	31.7	38	48.5	48.5	4089	0.5	0.2	-0.2	0.3	-0.2	0.5	4089	-0.2	-0.3	-1.6	-1.4	-1.6	-0.2
4090	26.5	32	39.6	49.9	49.9	4090	27	32.2	39.4	50.2	50.2	4090	26.3	31.7	38	48.5	48.5	4090	0.5	0.2	-0.2	0.3	-0.2	0.5	4090	-0.2	-0.3	-1.6	-1.4	-1.6	-0.2
4091	21.7	26	32.4	41.6	41.6	4091	21	26.2	33.3	41.4	41.4	4091	20.8	25.6	33	40.7	40.7	4091	-0.7	0.2	0.9	-0.2	-0.7	0.9	4091	-0.9	-0.4	0.6	-0.9	-0.9	0.6
4092	24.5	24.5	23.5	24.6	24.6	4092	24.4	26.1	25.5	25.5	26.1	4092	24.4	25.3	24.9	25.1	25.3	4092	-0.1	1.6	2	0.9	-0.1	2	4092	-0.1	0.8	1.4	0.5	-0.1	1.4
4093	24.5	24.5	23.5	24.6	24.6	4093	24.4	26.1	25.5	25.5	26.1	4093	24.4	25.3	24.9	25.1	25.3	4093	-0.1	1.6	2	0.9	-0.1	2	4093	-0.1	0.8	1.4	0.5	-0.1	1.4
4094	24.5	24.5	23.5	24.6	24.6	4094	24.4	26.1	25.5	25.5	26.1	4094	24.4	25.3	24.9	25.1	25.3	4094	-0.1	1.6	2	0.9	-0.1	2	4094	-0.1	0.8	1.4	0.5	-0.1	1.4
4095	24.5	24.5	23.5	24.6	24.6	4095	24.4	26.1	25.5	25.5	26.1	4095	24.4	25.3	24.9	25.1	25.3	4095	-0.1	1.6	2	0.9	-0.1	2	4095	-0.1	0.8	1.4	0.5	-0.1	1.4
4096	22.8	23.2	23.5	23.7	23.7	4096	23.5	25.6	23.4	25.2	25.6	4096	23.8	24.2	24.7	24	24.7	4096	0.7	2.4	-0.1	1.5	-0.1	2.4	4096	1	1	1.2	0.3	0.3	1.2
4097	22.8	23.2	23.5	23.7	23.7	4097	23.5	25.6	23.4	25.2	25.6	4097	23.8	24.2	24.7	24	24.7	4097	0.7	2.4	-0.1	1.5	-0.1	2.4	4097	1	1	1.2	0.3	0.3	1.2
4098	22.8	23.2	23.5	23.7	23.7	4098	23.5	25.6	23.4	25.2	25.6	4098	23.8	24.2	24.7	24	24.7	4098	0.7	2.4	-0.1	1.5	-0.1	2.4	4098	1	1	1.2	0.3	0.3	1.2
4099	19.6	21.9	25	31.8	31.8	4099	16.9	21.4	25.5	32	32	4099	18.7	22	26	32.6	32.6	4099	-2.7	-0.5	0.5	0.2	-2.7	0.5	4099	-0.9	0.1	1	0.8	-0.9	1
4100	19.6	21.9	25	31.8	31.8	4100	16.9	21.4	25.5	32	32	4100	18.7	22	26	32.6	32.6	4100	-2.7	-0.5	0.5	0.2	-2.7	0.5	4100	-0.9	0.1	1	0.8	-0.9	1
4101	19.6	21.9	25	31.8	31.8	4101	16.9	21.4	25.5	32	32	4101	18.7	22	26	32.6	32.6	4101	-2.7	-0.5	0.5	0.2	-2.7	0.5	4101	-0.9	0.1	1	0.8	-0.9	1
4102	19.6	21.9	25	31.8	31.8	4102	16.9	21.4	25.5	32	32	4102	18.7	22	26	32.6	32.6	4102	-2.7	-0.5	0.5	0.2	-2.7	0.5	4102	-0.9	0.1	1	0.8	-0.9	1
4103	19.6	21.9	25	31.8	31.8	4103	16.9	21.4	25.5	32	32	4103	18.7	22	26	32.6	32.6	4103	-2.7	-0.5	0.5	0.2	-2.7	0.5	4103	-0.9	0.1	1	0.8	-0.9	1
4104	19.6	21.9	25	31.8	31.8	4104	16.9	21.4	25.5	32	32	4104	18.7	22	26	32.6	32.6	4104	-2.7	-0.5	0.5	0.2	-2.7	0.5	4104	-0.9	0.1	1	0.8	-0.9	1
4105	19.6	21.9	25	31.8	31.8	4105	16.9	21.4	25.5	32	32	4105	18.7	22	26	32.6	32.6	4105	-2.7	-0.5	0.5	0.2	-2.7	0.5	4105	-0.9	0.1	1	0.8	-0.9	1
4106	19.6	21.9	25	31.8	31.8	4106	16.9	21.4	25.5	32	32	4106	18.7	22	26	32.6	32.6	4106	-2.7	-0.5	0.5	0.2	-2.7	0.5	4106	-0.9	0.1	1	0.8	-0.9	1
4107	19.3	21.7	22.9	27.7	27.7	4107	19.5	22.2	23.9	27.8	27.8	4107	19.7	22.1	24.7	27.8	27.8	4107	0.2	0.5	1	0.1	0.1	1	4107	0.4	0.4	1.8	0.1	0.1	1.8
4108	2.4	1.7	1.8	1.7	2.4	4108	0.7	0.3	1.7	1.2	1.7	4108	1	0.4	0.5	0.3	1	4108	-1.7	-1.4	-0.1	-0.5	-1.7	-0.1	4108	-1.4	-1.3	-1.3	-1.4	-1.4	-1.3
4109	2.4	1.7	1.8	1.7	2.4	4109	0.7	0.3	1.7	1.2	1.7	4109	1	0.4	0.5	0.3	1	4109	-1.7	-1.4	-0.1	-0.5	-1.7	-0.1	4109	-1.4	-1.3	-1.3	-1.4	-1.4	-1.3
4110	2.4	1.7	1.8	1.7	2.4	4110	0.7	0.3	1.7	1.2	1.7	4110	1	0.4	0.5	0.3	1	4110	-1.7	-1.4	-0.1	-0.5	-1.7	-0.1	4110	-1.4	-1.3	-1.3	-1.4	-1.4	-1.3
4111	2.4	1.7	1.8	1.7	2.4	4111	0.7	0.3	1.7	1.2	1.7	4111	1	0.4	0.5	0.3	1	4111	-1.7	-1.4	-0.1	-0.5	-1.7	-0.1	4111	-1.4	-1.3	-1.3	-1.4	-1.4	-1.3
4112	3.1	2.6	2.5	2.7	3.1	4112	1.9	2.7	2.1	2.5	2.7	4112	2.8	2.5	2.4	2.5	2.8	4112	-1.2	0.1	-0.4	-0.2	-1.2	0.1	4112	-0.3	-0.1	-0.1	-0.2	-0.3	-0.1
4113	3.1	2.6	2.5	2.7	3.1	4113	1.9	2.7	2.1	2.5	2.7	4113	2.8	2.5	2.4	2.5	2.8	4113	-1.2	0.1	-0.4	-0.2	-1.2	0.1	4113	-0.3	-0.1	-0.1	-0.2	-0.3	-0.1
4114	3.1	2.6	2.5	2.7	3.1	4114	1.9	2.7	2.1	2.5	2.7	4114	2.8	2.5	2.4	2.5	2.8	4114	-1.2	0.1	-0.4	-0.2	-1.2	0.1	4114	-0.3	-0.1	-0.1	-0.2	-0.3	-0.1
4115	3.1	2.6	2.5	2.7	3.1	4115	1.9	2.7	2.1	2.5	2.7	4115	2.8	2.5	2.4	2.5	2.8	4115	-1.2	0.1	-0.4	-0.2	-1.2	0.1	4115	-0.3	-0.1	-0.1	-0.2	-0.3	-0.1
4116	1.2	1.3	1.6	1.2	1.6	4116	1.2	1.9	1.8	1.9	1.9	4116	1.4	1.4	0.9	1.5	1.5	4116	0	0.6	0.2	0.7	0	0.7	4116	0.2	0.1	-0.7	0.3	-0.7	0.3
4117	-0.6	-1.1	-1.7	-2.1	-0.6	4117	-1.2	-0.8	-1.6	-1.8	-0.8	4117	-0.4	-0.5	-0.9	-1.4	-0.4	4117	-0.6	0.3	0.1	0.3	-0.6	0.3	4117	0.2	0.6	0.8	0.7	0.2	0.8
4118	-0.6	-1.1	-1.7	-2.1	-0.6	4118	-1.2	-0.8	-1.6	-1.8	-0.8	4118	-0.4	-0.5	-0.9	-1.4	-0.4	4118	-0.6	0.3	0.1	0.3	-0.6	0.3	4118	0.2	0.6	0.8	0.7	0.2	0.8
4119	-0.6	-1.1	-1.7	-2.1	-0.6	4119	-1.2	-0.8	-1.6	-1.8	-0.8	4119	-0.4	-0.5	-0.9	-1.4	-0.4	4119	-0.6	0.3	0.1	0.3	-0.6	0.3	4119	0.2	0.6	0.8	0.7	0.2	0.8
4120	1.7	0.9	1.4	0.9	1.7	4120	0.4	1.1	1.6	1.3	1.6	4120	1.8	0.9	1.4	1.7	1.8	4120	-1.3	0.2	0.2	0.4	-1.3	0.4	4120	0.1	0	0	0.8	0	0.8
4121	16.4	19.2	20	20	20	4121	17.5	21.2	20.8	21.2	21.2	4121	16.2	20.2	20.7	20.7	20.7	4121	1.1	2	0.8	1.2	0.8	2	4121	-0.2	1	0.7	0.7	-0.2	1
4122	16.4	19.2	20	20	20	4122	17.5	21.2	20.8	21.2	21.2	4122	16.2	20.2	20.7	20.7	20.7	4122	1.1	2	0.8	1.2	0.8	2	4122	-0.2	1	0.7	0.7	-0.2	1
4123	16.4	19.2	20	20	20	4123	17.5	21.2	20.8	21.2	21.2	4123	16.2	20.2	20.7	20.7	20.7	4123	1.1	2	0.8	1.2	0.8	2	4123	-0.2	1	0.7	0.7	-0.2	1
4124						4124						4124						4124							4124
4125						4125						4125						4125							4125
4126						4126						4126						4126							4126
4127						4127						4127						4127							4127
4128	11.7	15.9	19.5	19.7	19.7	4128	11.5	17.1	19.5	20.2	20.2	4128	11.3	16.2	18.8	21.1	21.1	4128	-0.2	1.2	0	0.5	-0.2	1.2	4128	-0.4	0.3	-0.7	1.4	-0.7	1.4
4129	11.7	15.9	19.5	19.7	19.7	4129	11.5	17.1	19.5	20.2	20.2	4129	11.3	16.2	18.8	21.1	21.1	4129	-0.2	1.2	0	0.5	-0.2	1.2	4129	-0.4	0.3	-0.7	1.4	-0.7	1.4
4130	11.7	15.9	19.5	19.7	19.7	4130	11.5	17.1	19.5	20.2	20.2	4130	11.3	16.2	18.8	21.1	21.1	4130	-0.2	1.2	0	0.5	-0.2	1.2	4130	-0.4	0.3	-0.7	1.4	-0.7	1.4
4131	18.9	23.6	27.2	33.3	33.3	4131	20.2	26.1	28.8	35	35	4131	19.2	24.5	27.8	34.3	34.3	4131	1.3	2.5	1.6	1.7	1.3	2.5	4131	0.3	0.9	0.6	1	0.3	1
4132	18.9	23.6	27.2	33.3	33.3	4132	20.2	26.1	28.8	35	35	4132	19.2	24.5	27.8	34.3	34.3	4132	1.3	2.5	1.6	1.7	1.3	2.5	4132	0.3	0.9	0.6	1	0.3	1
4133	2.8	1.4	-1.2	0.6	2.8	4133	1.8	1.6	-1.6	-0.1	1.8	4133	1.2	0.8	0.4	0.2	1.2	4133	-1	0.2	-0.4	-0.7	-1	0.2	4133	-1.6	-0.6	1.6	-0.4	-1.6	1.6
4134	2.8	1.4	-1.2	0.6	2.8	4134	1.8	1.6	-1.6	-0.1	1.8	4134	1.2	0.8	0.4	0.2	1.2	4134	-1	0.2	-0.4	-0.7	-1	0.2	4134	-1.6	-0.6	1.6	-0.4	-1.6	1.6
4135	2.8	1.4	-1.2	0.6	2.8	4135	1.8	1.6	-1.6	-0.1	1.8	4135	1.2	0.8	0.4	0.2	1.2	4135	-1	0.2	-0.4	-0.7	-1	0.2	4135	-1.6	-0.6	1.6	-0.4	-1.6	1.6
4136	0.6	-0.6	-1	0.9	0.9	4136	-1.1	-0.7	-0.6	0.1	0.1	4136	0.3	-0.4	-0.3	-0.9	0.3	4136	-1.7	-0.1	0.4	-0.8	-1.7	0.4	4136	-0.3	0.2	0.7	-1.8	-1.8	0.7
4137	0.6	-0.6	-1	0.9	0.9	4137	-1.1	-0.7	-0.6	0.1	0.1	4137	0.3	-0.4	-0.3	-0.9	0.3	4137	-1.7	-0.1	0.4	-0.8	-1.7	0.4	4137	-0.3	0.2	0.7	-1.8	-1.8	0.7
4138	2	2.2	3.2	10.4	10.4	4138	1.8	1.9	4.5	10.8	10.8	4138	2	2.5	4.3	10.5	10.5	4138	-0.2	-0.3	1.3	0.4	-0.3	1.3	4138	0	0.3	1.1	0.1	0	1.1
4139	1.6	1.5	2.9	12	12	4139	1.3	2.3	3.9	12.7	12.7	4139	1.5	2	3.4	12.8	12.8	4139	-0.3	0.8	1	0.7	-0.3	1	4139	-0.1	0.5	0.5	0.8	-0.1	0.8
4140	24.4	25.1	25.5	32.4	32.4	4140	21.8	22.1	25.2	31.5	31.5	4140	23.4	23.4	25.4	32.4	32.4	4140	-2.6	-3	-0.3	-0.9	-3	-0.3	4140	-1	-1.7	-0.1	0	-1.7	0
4141	24.4	25.1	25.5	32.4	32.4	4141	21.8	22.1	25.2	31.5	31.5	4141	23.4	23.4	25.4	32.4	32.4	4141	-2.6	-3	-0.3	-0.9	-3	-0.3	4141	-1	-1.7	-0.1	0	-1.7	0
4142	24.4	25.1	25.5	32.4	32.4	4142	21.8	22.1	25.2	31.5	31.5	4142	23.4	23.4	25.4	32.4	32.4	4142	-2.6	-3	-0.3	-0.9	-3	-0.3	4142	-1	-1.7	-0.1	0	-1.7	0
4143	24.4	25.1	25.5	32.4	32.4	4143	21.8	22.1	25.2	31.5	31.5	4143	23.4	23.4	25.4	32.4	32.4	4143	-2.6	-3	-0.3	-0.9	-3	-0.3	4143	-1	-1.7	-0.1	0	-1.7	0
4144	24.4	25.1	25.5	32.4	32.4	4144	21.8	22.1	25.2	31.5	31.5	4144	23.4	23.4	25.4	32.4	32.4	4144	-2.6	-3	-0.3	-0.9	-3	-0.3	4144	-1	-1.7	-0.1	0	-1.7	0
4145	24.4	25.1	25.5	32.4	32.4	4145	21.8	22.1	25.2	31.5	31.5	4145	23.4	23.4	25.4	32.4	32.4	4145	-2.6	-3	-0.3	-0.9	-3	-0.3	4145	-1	-1.7	-0.1	0	-1.7	0
4146	24.4	25.1	25.5	32.4	32.4	4146	21.8	22.1	25.2	31.5	31.5	4146	23.4	23.4	25.4	32.4	32.4	4146	-2.6	-3	-0.3	-0.9	-3	-0.3	4146	-1	-1.7	-0.1	0	-1.7	0
4147	24.3	29.5	29.9	38.5	38.5	4147	27	31.7	32	36.7	36.7	4147	26	30.3	32.6	40.2	40.2	4147	2.7	2.2	2.1	-1.8	-1.8	2.7	4147	1.7	0.8	2.7	1.7	0.8	2.7
4148	24.3	29.5	29.9	38.5	38.5	4148	27	31.7	32	36.7	36.7	4148	26	30.3	32.6	40.2	40.2	4148	2.7	2.2	2.1	-1.8	-1.8	2.7	4148	1.7	0.8	2.7	1.7	0.8	2.7
4149	1.8	1.3	1.1	1.4	1.8	4149	1.5	1.7	2.2	2.8	2.8	4149	2.9	2.4	2.7	2.2	2.9	4149	-0.3	0.4	1.1	1.4	-0.3	1.4	4149	1.1	1.1	1.6	0.8	0.8	1.6
4150	1.8	1.3	1.1	1.4	1.8	4150	1.5	1.7	2.2	2.8	2.8	4150	2.9	2.4	2.7	2.2	2.9	4150	-0.3	0.4	1.1	1.4	-0.3	1.4	4150	1.1	1.1	1.6	0.8	0.8	1.6
4151	1.8	1.3	1.1	1.4	1.8	4151	1.5	1.7	2.2	2.8	2.8	4151	2.9	2.4	2.7	2.2	2.9	4151	-0.3	0.4	1.1	1.4	-0.3	1.4	4151	1.1	1.1	1.6	0.8	0.8	1.6
4152	7.6	9.4	9.6	11.5	11.5	4152	7.5	10.3	9.8	9.5	10.3	4152	7	9	9.9	9	9.9	4152	-0.1	0.9	0.2	-2	-2	0.9	4152	-0.6	-0.4	0.3	-2.5	-2.5	0.3
4153	7.6	9.4	9.6	11.5	11.5	4153	7.5	10.3	9.8	9.5	10.3	4153	7	9	9.9	9	9.9	4153	-0.1	0.9	0.2	-2	-2	0.9	4153	-0.6	-0.4	0.3	-2.5	-2.5	0.3
4154	7.6	9.4	9.6	11.5	11.5	4154	7.5	10.3	9.8	9.5	10.3	4154	7	9	9.9	9	9.9	4154	-0.1	0.9	0.2	-2	-2	0.9	4154	-0.6	-0.4	0.3	-2.5	-2.5	0.3
4155	-1.6	0.4	-2.5	0.6	0.6	4155	-1.1	-0.7	-1.9	2	2	4155	-0.3	0.8	-1.6	1.9	1.9	4155	0.5	-1.1	0.6	1.4	-1.1	1.4	4155	1.3	0.4	0.9	1.3	0.4	1.3
4156	3.1	2.8	7.1	21	21	4156	2.3	4.3	7.6	21.4	21.4	4156	3.2	3.4	4.9	18.6	18.6	4156	-0.8	1.5	0.5	0.4	-0.8	1.5	4156	0.1	0.6	-2.2	-2.4	-2.4	0.6
4157	3.1	2.8	7.1	21	21	4157	2.3	4.3	7.6	21.4	21.4	4157	3.2	3.4	4.9	18.6	18.6	4157	-0.8	1.5	0.5	0.4	-0.8	1.5	4157	0.1	0.6	-2.2	-2.4	-2.4	0.6
4158	0.9	0.8	0.6	2.6	2.6	4158	0.2	1.1	0.3	2.8	2.8	4158	0.4	1	0.3	2.4	2.4	4158	-0.7	0.3	-0.3	0.2	-0.7	0.3	4158	-0.5	0.2	-0.3	-0.2	-0.5	0.2
4159	0.9	0.8	0.6	2.6	2.6	4159	0.2	1.1	0.3	2.8	2.8	4159	0.4	1	0.3	2.4	2.4	4159	-0.7	0.3	-0.3	0.2	-0.7	0.3	4159	-0.5	0.2	-0.3	-0.2	-0.5	0.2
4160	0.9	0.8	0.6	2.6	2.6	4160	0.2	1.1	0.3	2.8	2.8	4160	0.4	1	0.3	2.4	2.4	4160	-0.7	0.3	-0.3	0.2	-0.7	0.3	4160	-0.5	0.2	-0.3	-0.2	-0.5	0.2
4161	0.2	2.3	2.1	21.3	21.3	4161	1	3.3	4.1	21.1	21.1	4161	0.9	2.3	3.3	20.6	20.6	4161	0.8	1	2	-0.2	-0.2	2	4161	0.7	0	1.2	-0.7	-0.7	1.2
4162	0.2	2.3	2.1	21.3	21.3	4162	1	3.3	4.1	21.1	21.1	4162	0.9	2.3	3.3	20.6	20.6	4162	0.8	1	2	-0.2	-0.2	2	4162	0.7	0	1.2	-0.7	-0.7	1.2
4163	0.2	2.3	2.1	21.3	21.3	4163	1	3.3	4.1	21.1	21.1	4163	0.9	2.3	3.3	20.6	20.6	4163	0.8	1	2	-0.2	-0.2	2	4163	0.7	0	1.2	-0.7	-0.7	1.2
4164	5.9	5.9	7.4	18.7	18.7	4164	6.2	6.3	6.9	19.8	19.8	4164	6.8	6	6.8	20.6	20.6	4164	0.3	0.4	-0.5	1.1	-0.5	1.1	4164	0.9	0.1	-0.6	1.9	-0.6	1.9
4165	41.6	44.4	44.9	46.7	46.7	4165	40.2	43.7	45.1	46.1	46.1	4165	41.6	43.7	45.9	46.6	46.6	4165	-1.4	-0.7	0.2	-0.6	-1.4	0.2	4165	0	-0.7	1	-0.1	-0.7	1
4166	37.8	44.5	46	45.4	46	4166	38.2	46	46.6	46.9	46.9	4166	38.8	46.1	45.5	45.7	46.1	4166	0.4	1.5	0.6	1.5	0.4	1.5	4166	1	1.6	-0.5	0.3	-0.5	1.6
4167	37.8	44.5	46	45.4	46	4167	38.2	46	46.6	46.9	46.9	4167	38.8	46.1	45.5	45.7	46.1	4167	0.4	1.5	0.6	1.5	0.4	1.5	4167	1	1.6	-0.5	0.3	-0.5	1.6
4168	33.6	38.3	40.4	41	41	4168	35	42	41.2	41.5	42	4168	34	40.3	39.3	43.2	43.2	4168	1.4	3.7	0.8	0.5	0.5	3.7	4168	0.4	2	-1.1	2.2	-1.1	2.2
4169	33.6	38.3	40.4	41	41	4169	35	42	41.2	41.5	42	4169	34	40.3	39.3	43.2	43.2	4169	1.4	3.7	0.8	0.5	0.5	3.7	4169	0.4	2	-1.1	2.2	-1.1	2.2
4170	33.6	38.3	40.4	41	41	4170	35	42	41.2	41.5	42	4170	34	40.3	39.3	43.2	43.2	4170	1.4	3.7	0.8	0.5	0.5	3.7	4170	0.4	2	-1.1	2.2	-1.1	2.2
4171	7.4	11.5	24.1	39.6	39.6	4171	6.4	10.9	25.5	39.7	39.7	4171	7.3	10.8	24	40.2	40.2	4171	-1	-0.6	1.4	0.1	-1	1.4	4171	-0.1	-0.7	-0.1	0.6	-0.7	0.6
4172	2.9	6.7	13.8	18.5	18.5	4172	4.1	7.9	13.6	19.6	19.6	4172	3.4	7.2	13.4	18.6	18.6	4172	1.2	1.2	-0.2	1.1	-0.2	1.2	4172	0.5	0.5	-0.4	0.1	-0.4	0.5
4173	2.9	6.7	13.8	18.5	18.5	4173	4.1	7.9	13.6	19.6	19.6	4173	3.4	7.2	13.4	18.6	18.6	4173	1.2	1.2	-0.2	1.1	-0.2	1.2	4173	0.5	0.5	-0.4	0.1	-0.4	0.5
4174	2.9	6.7	13.8	18.5	18.5	4174	4.1	7.9	13.6	19.6	19.6	4174	3.4	7.2	13.4	18.6	18.6	4174	1.2	1.2	-0.2	1.1	-0.2	1.2	4174	0.5	0.5	-0.4	0.1	-0.4	0.5
4175	18.6	19	21.7	38.2	38.2	4175	18.9	18.2	23.1	38.8	38.8	4175	19	19.5	25	37.7	37.7	4175	0.3	-0.8	1.4	0.6	-0.8	1.4	4175	0.4	0.5	3.3	-0.5	-0.5	3.3
4176	18.6	19	21.7	38.2	38.2	4176	18.9	18.2	23.1	38.8	38.8	4176	19	19.5	25	37.7	37.7	4176	0.3	-0.8	1.4	0.6	-0.8	1.4	4176	0.4	0.5	3.3	-0.5	-0.5	3.3
4177	18.6	19	21.7	38.2	38.2	4177	18.9	18.2	23.1	38.8	38.8	4177	19	19.5	25	37.7	37.7	4177	0.3	-0.8	1.4	0.6	-0.8	1.4	4177	0.4	0.5	3.3	-0.5	-0.5	3.3
4178						4178						4178						4178							4178
4179	46.6	53.8	56.8	57.9	57.9	4179	45.4	53.5	56.8	56.8	56.8	4179	46.8	52.7	59	58.4	59	4179	-1.2	-0.3	0	-1.1	-1.2	0	4179	0.2	-1.1	2.2	0.5	-1.1	2.2
4180	46.6	53.8	56.8	57.9	57.9	4180	45.4	53.5	56.8	56.8	56.8	4180	46.8	52.7	59	58.4	59	4180	-1.2	-0.3	0	-1.1	-1.2	0	4180	0.2	-1.1	2.2	0.5	-1.1	2.2
4181	46.6	53.8	56.8	57.9	57.9	4181	45.4	53.5	56.8	56.8	56.8	4181	46.8	52.7	59	58.4	59	4181	-1.2	-0.3	0	-1.1	-1.2	0	4181	0.2	-1.1	2.2	0.5	-1.1	2.2
4182	40.6	44.9	48.4	49.1	49.1	4182	40.2	42.4	50.3	49.2	50.3	4182	39.4	43.7	50.4	49.3	50.4	4182	-0.4	-2.5	1.9	0.1	-2.5	1.9	4182	-1.2	-1.2	2	0.2	-1.2	2
4183	40.6	44.9	48.4	49.1	49.1	4183	40.2	42.4	50.3	49.2	50.3	4183	39.4	43.7	50.4	49.3	50.4	4183	-0.4	-2.5	1.9	0.1	-2.5	1.9	4183	-1.2	-1.2	2	0.2	-1.2	2
4184	40.6	44.9	48.4	49.1	49.1	4184	40.2	42.4	50.3	49.2	50.3	4184	39.4	43.7	50.4	49.3	50.4	4184	-0.4	-2.5	1.9	0.1	-2.5	1.9	4184	-1.2	-1.2	2	0.2	-1.2	2
4185	46.6	53.8	56.8	57.9	57.9	4185	45.4	53.5	56.8	56.8	56.8	4185	46.8	52.7	59	58.4	59	4185	-1.2	-0.3	0	-1.1	-1.2	0	4185	0.2	-1.1	2.2	0.5	-1.1	2.2
4186	14.7	19.2	28.2	46	46	4186	12.8	16.4	28.3	44.9	44.9	4186	13.8	17.2	28.6	45.5	45.5	4186	-1.9	-2.8	0.1	-1.1	-2.8	0.1	4186	-0.9	-2	0.4	-0.5	-2	0.4
4187	15.8	18.7	26.4	36.2	36.2	4187	15.9	21	24.9	36.9	36.9	4187	16.2	20.1	24.2	37.3	37.3	4187	0.1	2.3	-1.5	0.7	-1.5	2.3	4187	0.4	1.4	-2.2	1.1	-2.2	1.4
4188	15.8	18.7	26.4	36.2	36.2	4188	15.9	21	24.9	36.9	36.9	4188	16.2	20.1	24.2	37.3	37.3	4188	0.1	2.3	-1.5	0.7	-1.5	2.3	4188	0.4	1.4	-2.2	1.1	-2.2	1.4
4189	15.8	18.7	26.4	36.2	36.2	4189	15.9	21	24.9	36.9	36.9	4189	16.2	20.1	24.2	37.3	37.3	4189	0.1	2.3	-1.5	0.7	-1.5	2.3	4189	0.4	1.4	-2.2	1.1	-2.2	1.4
4190	15.8	18.7	26.4	36.2	36.2	4190	15.9	21	24.9	36.9	36.9	4190	16.2	20.1	24.2	37.3	37.3	4190	0.1	2.3	-1.5	0.7	-1.5	2.3	4190	0.4	1.4	-2.2	1.1	-2.2	1.4
4191	15.8	18.7	26.4	36.2	36.2	4191	15.9	21	24.9	36.9	36.9	4191	16.2	20.1	24.2	37.3	37.3	4191	0.1	2.3	-1.5	0.7	-1.5	2.3	4191	0.4	1.4	-2.2	1.1	-2.2	1.4
4192	15.8	18.7	26.4	36.2	36.2	4192	15.9	21	24.9	36.9	36.9	4192	16.2	20.1	24.2	37.3	37.3	4192	0.1	2.3	-1.5	0.7	-1.5	2.3	4192	0.4	1.4	-2.2	1.1	-2.2	1.4
4193	15.8	18.7	26.4	36.2	36.2	4193	15.9	21	24.9	36.9	36.9	4193	16.2	20.1	24.2	37.3	37.3	4193	0.1	2.3	-1.5	0.7	-1.5	2.3	4193	0.4	1.4	-2.2	1.1	-2.2	1.4
4194	15.8	18.7	26.4	36.2	36.2	4194	15.9	21	24.9	36.9	36.9	4194	16.2	20.1	24.2	37.3	37.3	4194	0.1	2.3	-1.5	0.7	-1.5	2.3	4194	0.4	1.4	-2.2	1.1	-2.2	1.4
4195	13.9	18.2	29.5	43	43	4195	14.4	20.8	30	43.8	43.8	4195	15.1	20.5	29	44.5	44.5	4195	0.5	2.6	0.5	0.8	0.5	2.6	4195	1.2	2.3	-0.5	1.5	-0.5	2.3
4196	13.9	18.2	29.5	43	43	4196	14.4	20.8	30	43.8	43.8	4196	15.1	20.5	29	44.5	44.5	4196	0.5	2.6	0.5	0.8	0.5	2.6	4196	1.2	2.3	-0.5	1.5	-0.5	2.3
4197	13.9	18.2	29.5	43	43	4197	14.4	20.8	30	43.8	43.8	4197	15.1	20.5	29	44.5	44.5	4197	0.5	2.6	0.5	0.8	0.5	2.6	4197	1.2	2.3	-0.5	1.5	-0.5	2.3
4198						4198						4198						4198							4198
4199	33.7	33.5	34.1	34.7	34.7	4199	33.6	36.1	33.5	32.8	36.1	4199	34.1	34.4	35.3	34.7	35.3	4199	-0.1	2.6	-0.6	-1.9	-1.9	2.6	4199	0.4	0.9	1.2	0	0	1.2
4200	33.7	33.5	34.1	34.7	34.7	4200	33.6	36.1	33.5	32.8	36.1	4200	34.1	34.4	35.3	34.7	35.3	4200	-0.1	2.6	-0.6	-1.9	-1.9	2.6	4200	0.4	0.9	1.2	0	0	1.2
4201	33.7	33.5	34.1	34.7	34.7	4201	33.6	36.1	33.5	32.8	36.1	4201	34.1	34.4	35.3	34.7	35.3	4201	-0.1	2.6	-0.6	-1.9	-1.9	2.6	4201	0.4	0.9	1.2	0	0	1.2
4202	20.1	21.9	25.4	27.3	27.3	4202	19.4	22.2	26.1	26.3	26.3	4202	20.2	22	24.5	26	26	4202	-0.7	0.3	0.7	-1	-1	0.7	4202	0.1	0.1	-0.9	-1.3	-1.3	0.1
4203	20.1	21.9	25.4	27.3	27.3	4203	19.4	22.2	26.1	26.3	26.3	4203	20.2	22	24.5	26	26	4203	-0.7	0.3	0.7	-1	-1	0.7	4203	0.1	0.1	-0.9	-1.3	-1.3	0.1
4204	20.1	21.9	25.4	27.3	27.3	4204	19.4	22.2	26.1	26.3	26.3	4204	20.2	22	24.5	26	26	4204	-0.7	0.3	0.7	-1	-1	0.7	4204	0.1	0.1	-0.9	-1.3	-1.3	0.1
4205	20.1	21.9	25.4	27.3	27.3	4205	19.4	22.2	26.1	26.3	26.3	4205	20.2	22	24.5	26	26	4205	-0.7	0.3	0.7	-1	-1	0.7	4205	0.1	0.1	-0.9	-1.3	-1.3	0.1
4206	20.1	21.9	25.4	27.3	27.3	4206	19.4	22.2	26.1	26.3	26.3	4206	20.2	22	24.5	26	26	4206	-0.7	0.3	0.7	-1	-1	0.7	4206	0.1	0.1	-0.9	-1.3	-1.3	0.1
4207	15.2	16.3	19.5	19.6	19.6	4207	14.5	16.1	19.7	19.7	19.7	4207	14.9	16.2	17.7	18.9	18.9	4207	-0.7	-0.2	0.2	0.1	-0.7	0.2	4207	-0.3	-0.1	-1.8	-0.7	-1.8	-0.1
4208	15.2	16.3	19.5	19.6	19.6	4208	14.5	16.1	19.7	19.7	19.7	4208	14.9	16.2	17.7	18.9	18.9	4208	-0.7	-0.2	0.2	0.1	-0.7	0.2	4208	-0.3	-0.1	-1.8	-0.7	-1.8	-0.1
4209						4209						4209						4209							4209
4210						4210						4210						4210							4210
4211						4211						4211						4211							4211
4212						4212						4212						4212							4212
4213						4213						4213						4213							4213
4214						4214						4214						4214							4214
4215						4215						4215						4215							4215
4216						4216						4216						4216							4216
4217						4217						4217						4217							4217
4218						4218						4218						4218							4218
4219						4219						4219						4219							4219
4220						4220						4220						4220							4220
4221						4221						4221						4221							4221
4222						4222						4222						4222							4222
4223						4223						4223						4223							4223
4224						4224						4224						4224							4224
4225						4225						4225						4225							4225
4226	0.8	0.7	1.2	0.7	1.2	4226	1.8	1	1	1.6	1.8	4226	0.4	1	0.5	0.5	1	4226	1	0.3	-0.2	0.9	-0.2	1	4226	-0.4	0.3	-0.7	-0.2	-0.7	0.3
4227	0.8	0.7	1.2	0.7	1.2	4227	1.8	1	1	1.6	1.8	4227	0.4	1	0.5	0.5	1	4227	1	0.3	-0.2	0.9	-0.2	1	4227	-0.4	0.3	-0.7	-0.2	-0.7	0.3
4228	0.8	0.7	1.2	0.7	1.2	4228	1.8	1	1	1.6	1.8	4228	0.4	1	0.5	0.5	1	4228	1	0.3	-0.2	0.9	-0.2	1	4228	-0.4	0.3	-0.7	-0.2	-0.7	0.3
4229	0.8	0.7	1.2	0.7	1.2	4229	1.8	1	1	1.6	1.8	4229	0.4	1	0.5	0.5	1	4229	1	0.3	-0.2	0.9	-0.2	1	4229	-0.4	0.3	-0.7	-0.2	-0.7	0.3
4230	0.8	0.7	1.2	0.7	1.2	4230	1.8	1	1	1.6	1.8	4230	0.4	1	0.5	0.5	1	4230	1	0.3	-0.2	0.9	-0.2	1	4230	-0.4	0.3	-0.7	-0.2	-0.7	0.3
4231						4231						4231						4231							4231
4232	-0.5	0	-0.2	1	1	4232	-0.9	1	-1.1	-0.8	1	4232	-0.6	-0.2	-1.8	3.4	3.4	4232	-0.4	1	-0.9	-1.8	-1.8	1	4232	-0.1	-0.2	-1.6	2.4	-1.6	2.4
4233	-0.5	0	-0.2	1	1	4233	-0.9	1	-1.1	-0.8	1	4233	-0.6	-0.2	-1.8	3.4	3.4	4233	-0.4	1	-0.9	-1.8	-1.8	1	4233	-0.1	-0.2	-1.6	2.4	-1.6	2.4
4234	-0.5	0	-0.2	1	1	4234	-0.9	1	-1.1	-0.8	1	4234	-0.6	-0.2	-1.8	3.4	3.4	4234	-0.4	1	-0.9	-1.8	-1.8	1	4234	-0.1	-0.2	-1.6	2.4	-1.6	2.4
4235	-0.5	0	-0.2	1	1	4235	-0.9	1	-1.1	-0.8	1	4235	-0.6	-0.2	-1.8	3.4	3.4	4235	-0.4	1	-0.9	-1.8	-1.8	1	4235	-0.1	-0.2	-1.6	2.4	-1.6	2.4
4236	17.5	18.1	16.4	17.5	18.1	4236	18.5	18.1	17.1	17.7	18.5	4236	17.6	17.9	17.4	17.2	17.9	4236	1	0	0.7	0.2	0	1	4236	0.1	-0.2	1	-0.3	-0.3	1
4237	30.6	31.6	31.2	32	32	4237	28.2	32.4	30.7	30.7	32.4	4237	29.1	31.5	29.9	31	31.5	4237	-2.4	0.8	-0.5	-1.3	-2.4	0.8	4237	-1.5	-0.1	-1.3	-1	-1.5	-0.1
4238	6	9.7	16.9	25.2	25.2	4238	6	11.6	17.7	25.5	25.5	4238	5.7	10.4	16.8	25.4	25.4	4238	0	1.9	0.8	0.3	0	1.9	4238	-0.3	0.7	-0.1	0.2	-0.3	0.7
4239	6	9.7	16.9	25.2	25.2	4239	6	11.6	17.7	25.5	25.5	4239	5.7	10.4	16.8	25.4	25.4	4239	0	1.9	0.8	0.3	0	1.9	4239	-0.3	0.7	-0.1	0.2	-0.3	0.7
4240	6	9.7	16.9	25.2	25.2	4240	6	11.6	17.7	25.5	25.5	4240	5.7	10.4	16.8	25.4	25.4	4240	0	1.9	0.8	0.3	0	1.9	4240	-0.3	0.7	-0.1	0.2	-0.3	0.7
4241	6	9.7	16.9	25.2	25.2	4241	6	11.6	17.7	25.5	25.5	4241	5.7	10.4	16.8	25.4	25.4	4241	0	1.9	0.8	0.3	0	1.9	4241	-0.3	0.7	-0.1	0.2	-0.3	0.7
4242	6	9.7	16.9	25.2	25.2	4242	6	11.6	17.7	25.5	25.5	4242	5.7	10.4	16.8	25.4	25.4	4242	0	1.9	0.8	0.3	0	1.9	4242	-0.3	0.7	-0.1	0.2	-0.3	0.7
4243						4243						4243						4243							4243
4244	13.7	15.7	17	22.4	22.4	4244	14.6	16.3	17.3	24.1	24.1	4244	14.5	15.8	18.9	24.6	24.6	4244	0.9	0.6	0.3	1.7	0.3	1.7	4244	0.8	0.1	1.9	2.2	0.1	2.2
4245	13.7	15.7	17	22.4	22.4	4245	14.6	16.3	17.3	24.1	24.1	4245	14.5	15.8	18.9	24.6	24.6	4245	0.9	0.6	0.3	1.7	0.3	1.7	4245	0.8	0.1	1.9	2.2	0.1	2.2
4246	13.7	15.7	17	22.4	22.4	4246	14.6	16.3	17.3	24.1	24.1	4246	14.5	15.8	18.9	24.6	24.6	4246	0.9	0.6	0.3	1.7	0.3	1.7	4246	0.8	0.1	1.9	2.2	0.1	2.2
4247						4247						4247						4247							4247
4248						4248						4248						4248							4248
4249	1.3	1	0.3	1.5	1.5	4249	-0.4	-0.9	1.3	1.3	1.3	4249	-0.2	-0.1	-0.1	-0.1	-0.1	4249	-1.7	-1.9	1	-0.2	-1.9	1	4249	-1.5	-1.1	-0.4	-1.6	-1.6	-0.4
4250	1.3	1	0.3	1.5	1.5	4250	-0.4	-0.9	1.3	1.3	1.3	4250	-0.2	-0.1	-0.1	-0.1	-0.1	4250	-1.7	-1.9	1	-0.2	-1.9	1	4250	-1.5	-1.1	-0.4	-1.6	-1.6	-0.4
4251	1.3	1	0.3	1.5	1.5	4251	-0.4	-0.9	1.3	1.3	1.3	4251	-0.2	-0.1	-0.1	-0.1	-0.1	4251	-1.7	-1.9	1	-0.2	-1.9	1	4251	-1.5	-1.1	-0.4	-1.6	-1.6	-0.4
4252	16.2	16	15.7	16.2	16.2	4252	14.5	14.7	15.2	15.2	15.2	4252	15.9	15.3	15.3	15.2	15.9	4252	-1.7	-1.3	-0.5	-1	-1.7	-0.5	4252	-0.3	-0.7	-0.4	-1	-1	-0.3
4253	16.2	16	15.7	16.2	16.2	4253	14.5	14.7	15.2	15.2	15.2	4253	15.9	15.3	15.3	15.2	15.9	4253	-1.7	-1.3	-0.5	-1	-1.7	-0.5	4253	-0.3	-0.7	-0.4	-1	-1	-0.3
4254	16.2	16	15.7	16.2	16.2	4254	14.5	14.7	15.2	15.2	15.2	4254	15.9	15.3	15.3	15.2	15.9	4254	-1.7	-1.3	-0.5	-1	-1.7	-0.5	4254	-0.3	-0.7	-0.4	-1	-1	-0.3
4255	15.6	15.6	14.9	14.6	15.6	4255	16.2	17.3	15.2	15.9	17.3	4255	16	16.2	14.7	15.5	16.2	4255	0.6	1.7	0.3	1.3	0.3	1.7	4255	0.4	0.6	-0.2	0.9	-0.2	0.9
4256	58.5	57.1	55.6	57.3	58.5	4256	56.5	58.2	57.1	57.8	58.2	4256	57.5	57.9	56.6	56.3	57.9	4256	-2	1.1	1.5	0.5	-2	1.5	4256	-1	0.8	1	-1	-1	1
4257	58.5	57.1	55.6	57.3	58.5	4257	56.5	58.2	57.1	57.8	58.2	4257	57.5	57.9	56.6	56.3	57.9	4257	-2	1.1	1.5	0.5	-2	1.5	4257	-1	0.8	1	-1	-1	1
4258	58.5	57.1	55.6	57.3	58.5	4258	56.5	58.2	57.1	57.8	58.2	4258	57.5	57.9	56.6	56.3	57.9	4258	-2	1.1	1.5	0.5	-2	1.5	4258	-1	0.8	1	-1	-1	1
4259	44.7	45	44.2	44	45	4259	44.2	46.6	43.3	44	46.6	4259	45.1	45.3	43.3	44.7	45.3	4259	-0.5	1.6	-0.9	0	-0.9	1.6	4259	0.4	0.3	-0.9	0.7	-0.9	0.7
4260	44.7	45	44.2	44	45	4260	44.2	46.6	43.3	44	46.6	4260	45.1	45.3	43.3	44.7	45.3	4260	-0.5	1.6	-0.9	0	-0.9	1.6	4260	0.4	0.3	-0.9	0.7	-0.9	0.7
4261						4261						4261						4261							4261
4262	6.6	8.1	11.3	13.1	13.1	4262	4.5	6.6	10.1	11.7	11.7	4262	6.4	6.9	10.8	11.9	11.9	4262	-2.1	-1.5	-1.2	-1.4	-2.1	-1.2	4262	-0.2	-1.2	-0.5	-1.2	-1.2	-0.2
4263	6.6	8.1	11.3	13.1	13.1	4263	4.5	6.6	10.1	11.7	11.7	4263	6.4	6.9	10.8	11.9	11.9	4263	-2.1	-1.5	-1.2	-1.4	-2.1	-1.2	4263	-0.2	-1.2	-0.5	-1.2	-1.2	-0.2
4264	6.6	8.1	11.3	13.1	13.1	4264	4.5	6.6	10.1	11.7	11.7	4264	6.4	6.9	10.8	11.9	11.9	4264	-2.1	-1.5	-1.2	-1.4	-2.1	-1.2	4264	-0.2	-1.2	-0.5	-1.2	-1.2	-0.2
4265	6.6	8.1	11.3	13.1	13.1	4265	4.5	6.6	10.1	11.7	11.7	4265	6.4	6.9	10.8	11.9	11.9	4265	-2.1	-1.5	-1.2	-1.4	-2.1	-1.2	4265	-0.2	-1.2	-0.5	-1.2	-1.2	-0.2
4266	20.3	21.3	25.1	32.8	32.8	4266	20.3	22.7	23.8	33.3	33.3	4266	20.5	21.5	23.5	30.5	30.5	4266	0	1.4	-1.3	0.5	-1.3	1.4	4266	0.2	0.2	-1.6	-2.3	-2.3	0.2
4267	8.2	9.5	15.8	25.8	25.8	4267	7.6	10.8	16.1	26.2	26.2	4267	7.9	9.7	13.9	25.5	25.5	4267	-0.6	1.3	0.3	0.4	-0.6	1.3	4267	-0.3	0.2	-1.9	-0.3	-1.9	0.2
4268	8.2	9.5	15.8	25.8	25.8	4268	7.6	10.8	16.1	26.2	26.2	4268	7.9	9.7	13.9	25.5	25.5	4268	-0.6	1.3	0.3	0.4	-0.6	1.3	4268	-0.3	0.2	-1.9	-0.3	-1.9	0.2
4269	8.2	9.5	15.8	25.8	25.8	4269	7.6	10.8	16.1	26.2	26.2	4269	7.9	9.7	13.9	25.5	25.5	4269	-0.6	1.3	0.3	0.4	-0.6	1.3	4269	-0.3	0.2	-1.9	-0.3	-1.9	0.2
4270	8.2	9.5	15.8	25.8	25.8	4270	7.6	10.8	16.1	26.2	26.2	4270	7.9	9.7	13.9	25.5	25.5	4270	-0.6	1.3	0.3	0.4	-0.6	1.3	4270	-0.3	0.2	-1.9	-0.3	-1.9	0.2
4271	8.2	9.5	15.8	25.8	25.8	4271	7.6	10.8	16.1	26.2	26.2	4271	7.9	9.7	13.9	25.5	25.5	4271	-0.6	1.3	0.3	0.4	-0.6	1.3	4271	-0.3	0.2	-1.9	-0.3	-1.9	0.2
4272	25.2	26.8	31.9	36.7	36.7	4272	24.8	27.9	29.8	36.5	36.5	4272	26.1	27.2	28.4	34.1	34.1	4272	-0.4	1.1	-2.1	-0.2	-2.1	1.1	4272	0.9	0.4	-3.5	-2.6	-3.5	0.9
4273	25.2	26.8	31.9	36.7	36.7	4273	24.8	27.9	29.8	36.5	36.5	4273	26.1	27.2	28.4	34.1	34.1	4273	-0.4	1.1	-2.1	-0.2	-2.1	1.1	4273	0.9	0.4	-3.5	-2.6	-3.5	0.9
4274	25.2	26.8	31.9	36.7	36.7	4274	24.8	27.9	29.8	36.5	36.5	4274	26.1	27.2	28.4	34.1	34.1	4274	-0.4	1.1	-2.1	-0.2	-2.1	1.1	4274	0.9	0.4	-3.5	-2.6	-3.5	0.9
4275						4275						4275						4275							4275
4276						4276						4276						4276							4276
4277	-0.1	-0.4	1.3	9.8	9.8	4277	-0.7	1	1.2	11	11	4277	-0.3	0.3	0.2	9.8	9.8	4277	-0.6	1.4	-0.1	1.2	-0.6	1.4	4277	-0.2	0.7	-1.1	0	-1.1	0.7
4278	-0.1	-0.4	1.3	9.8	9.8	4278	-0.7	1	1.2	11	11	4278	-0.3	0.3	0.2	9.8	9.8	4278	-0.6	1.4	-0.1	1.2	-0.6	1.4	4278	-0.2	0.7	-1.1	0	-1.1	0.7
4279	-0.1	-0.4	1.3	9.8	9.8	4279	-0.7	1	1.2	11	11	4279	-0.3	0.3	0.2	9.8	9.8	4279	-0.6	1.4	-0.1	1.2	-0.6	1.4	4279	-0.2	0.7	-1.1	0	-1.1	0.7
4280	-0.1	-0.4	1.3	9.8	9.8	4280	-0.7	1	1.2	11	11	4280	-0.3	0.3	0.2	9.8	9.8	4280	-0.6	1.4	-0.1	1.2	-0.6	1.4	4280	-0.2	0.7	-1.1	0	-1.1	0.7
4281	3.4	4.1	4.7	11.9	11.9	4281	2	1.3	5	11.9	11.9	4281	4.5	3.6	5.8	11.3	11.3	4281	-1.4	-2.8	0.3	0	-2.8	0.3	4281	1.1	-0.5	1.1	-0.6	-0.6	1.1
4282						4282						4282						4282							4282
4283	13.5	14.9	16.8	18.7	18.7	4283	12.4	13.3	16.9	19	19	4283	13.5	14.3	17.1	19.2	19.2	4283	-1.1	-1.6	0.1	0.3	-1.6	0.3	4283	0	-0.6	0.3	0.5	-0.6	0.5
4284	13.5	14.9	16.8	18.7	18.7	4284	12.4	13.3	16.9	19	19	4284	13.5	14.3	17.1	19.2	19.2	4284	-1.1	-1.6	0.1	0.3	-1.6	0.3	4284	0	-0.6	0.3	0.5	-0.6	0.5
4285	13.5	14.9	16.8	18.7	18.7	4285	12.4	13.3	16.9	19	19	4285	13.5	14.3	17.1	19.2	19.2	4285	-1.1	-1.6	0.1	0.3	-1.6	0.3	4285	0	-0.6	0.3	0.5	-0.6	0.5
4286	1.5	4.3	9.1	17.9	17.9	4286	3	8.6	9.6	19.6	19.6	4286	3.4	6.3	7	19.3	19.3	4286	1.5	4.3	0.5	1.7	0.5	4.3	4286	1.9	2	-2.1	1.4	-2.1	2
4287	1.5	4.3	9.1	17.9	17.9	4287	3	8.6	9.6	19.6	19.6	4287	3.4	6.3	7	19.3	19.3	4287	1.5	4.3	0.5	1.7	0.5	4.3	4287	1.9	2	-2.1	1.4	-2.1	2
4288	1.5	4.3	9.1	17.9	17.9	4288	3	8.6	9.6	19.6	19.6	4288	3.4	6.3	7	19.3	19.3	4288	1.5	4.3	0.5	1.7	0.5	4.3	4288	1.9	2	-2.1	1.4	-2.1	2
4289	16.7	17.5	19.2	22	22	4289	14.7	15.3	20.1	22	22	4289	16	15.8	20.7	22.6	22.6	4289	-2	-2.2	0.9	0	-2.2	0.9	4289	-0.7	-1.7	1.5	0.6	-1.7	1.5
4290	16.7	17.5	19.2	22	22	4290	14.7	15.3	20.1	22	22	4290	16	15.8	20.7	22.6	22.6	4290	-2	-2.2	0.9	0	-2.2	0.9	4290	-0.7	-1.7	1.5	0.6	-1.7	1.5
4291	16.7	17.5	19.2	22	22	4291	14.7	15.3	20.1	22	22	4291	16	15.8	20.7	22.6	22.6	4291	-2	-2.2	0.9	0	-2.2	0.9	4291	-0.7	-1.7	1.5	0.6	-1.7	1.5
4292	16.7	17.5	19.2	22	22	4292	14.7	15.3	20.1	22	22	4292	16	15.8	20.7	22.6	22.6	4292	-2	-2.2	0.9	0	-2.2	0.9	4292	-0.7	-1.7	1.5	0.6	-1.7	1.5
4293	16.7	17.5	19.2	22	22	4293	14.7	15.3	20.1	22	22	4293	16	15.8	20.7	22.6	22.6	4293	-2	-2.2	0.9	0	-2.2	0.9	4293	-0.7	-1.7	1.5	0.6	-1.7	1.5
4294	16.7	17.5	19.2	22	22	4294	14.7	15.3	20.1	22	22	4294	16	15.8	20.7	22.6	22.6	4294	-2	-2.2	0.9	0	-2.2	0.9	4294	-0.7	-1.7	1.5	0.6	-1.7	1.5
4295	-0.4	1.9	1.9	0.6	1.9	4295	0.8	2	2.2	0.5	2.2	4295	1.5	1.4	0.2	1.7	1.7	4295	1.2	0.1	0.3	-0.1	-0.1	1.2	4295	1.9	-0.5	-1.7	1.1	-1.7	1.9
4296	-0.4	1.9	1.9	0.6	1.9	4296	0.8	2	2.2	0.5	2.2	4296	1.5	1.4	0.2	1.7	1.7	4296	1.2	0.1	0.3	-0.1	-0.1	1.2	4296	1.9	-0.5	-1.7	1.1	-1.7	1.9
4297	-0.4	1.9	1.9	0.6	1.9	4297	0.8	2	2.2	0.5	2.2	4297	1.5	1.4	0.2	1.7	1.7	4297	1.2	0.1	0.3	-0.1	-0.1	1.2	4297	1.9	-0.5	-1.7	1.1	-1.7	1.9
4298	-0.4	1.9	1.9	0.6	1.9	4298	0.8	2	2.2	0.5	2.2	4298	1.5	1.4	0.2	1.7	1.7	4298	1.2	0.1	0.3	-0.1	-0.1	1.2	4298	1.9	-0.5	-1.7	1.1	-1.7	1.9
4299	2	2.5	2	1.9	2.5	4299	2.7	3.6	1	2.8	3.6	4299	2.8	2.8	0	2.2	2.8	4299	0.7	1.1	-1	0.9	-1	1.1	4299	0.8	0.3	-2	0.3	-2	0.8
4300	2.7	3	4.2	14.1	14.1	4300	2.7	3.8	5.3	14.6	14.6	4300	3	3.5	5.3	13.7	13.7	4300	0	0.8	1.1	0.5	0	1.1	4300	0.3	0.5	1.1	-0.4	-0.4	1.1
4301	2.7	3	4.2	14.1	14.1	4301	2.7	3.8	5.3	14.6	14.6	4301	3	3.5	5.3	13.7	13.7	4301	0	0.8	1.1	0.5	0	1.1	4301	0.3	0.5	1.1	-0.4	-0.4	1.1
4302	2.7	3	4.2	14.1	14.1	4302	2.7	3.8	5.3	14.6	14.6	4302	3	3.5	5.3	13.7	13.7	4302	0	0.8	1.1	0.5	0	1.1	4302	0.3	0.5	1.1	-0.4	-0.4	1.1
4303	2.7	3	4.2	14.1	14.1	4303	2.7	3.8	5.3	14.6	14.6	4303	3	3.5	5.3	13.7	13.7	4303	0	0.8	1.1	0.5	0	1.1	4303	0.3	0.5	1.1	-0.4	-0.4	1.1
4304	2.7	3	4.2	14.1	14.1	4304	2.7	3.8	5.3	14.6	14.6	4304	3	3.5	5.3	13.7	13.7	4304	0	0.8	1.1	0.5	0	1.1	4304	0.3	0.5	1.1	-0.4	-0.4	1.1
4305	2.7	3	4.2	14.1	14.1	4305	2.7	3.8	5.3	14.6	14.6	4305	3	3.5	5.3	13.7	13.7	4305	0	0.8	1.1	0.5	0	1.1	4305	0.3	0.5	1.1	-0.4	-0.4	1.1
4306	27.3	32.2	41	49.8	49.8	4306	27.6	32.4	41.9	49.7	49.7	4306	27	32.2	40.6	50.2	50.2	4306	0.3	0.2	0.9	-0.1	-0.1	0.9	4306	-0.3	0	-0.4	0.4	-0.4	0.4
4307	43.6	46	51.5	56.8	56.8	4307	42.9	48.1	53.3	55.8	55.8	4307	43.3	46.8	53	58.7	58.7	4307	-0.7	2.1	1.8	-1	-1	2.1	4307	-0.3	0.8	1.5	1.9	-0.3	1.9
4308	43.6	46	51.5	56.8	56.8	4308	42.9	48.1	53.3	55.8	55.8	4308	43.3	46.8	53	58.7	58.7	4308	-0.7	2.1	1.8	-1	-1	2.1	4308	-0.3	0.8	1.5	1.9	-0.3	1.9
4309	43.6	46	51.5	56.8	56.8	4309	42.9	48.1	53.3	55.8	55.8	4309	43.3	46.8	53	58.7	58.7	4309	-0.7	2.1	1.8	-1	-1	2.1	4309	-0.3	0.8	1.5	1.9	-0.3	1.9
4310	43.6	46	51.5	56.8	56.8	4310	42.9	48.1	53.3	55.8	55.8	4310	43.3	46.8	53	58.7	58.7	4310	-0.7	2.1	1.8	-1	-1	2.1	4310	-0.3	0.8	1.5	1.9	-0.3	1.9
4311	41.6	47.5	54.8	57.5	57.5	4311	39.3	48.5	53.6	56.5	56.5	4311	42.5	48.2	54.1	58.8	58.8	4311	-2.3	1	-1.2	-1	-2.3	1	4311	0.9	0.7	-0.7	1.3	-0.7	1.3
4312	24.8	32.9	45.1	52.1	52.1	4312	25.1	34.6	46	52	52	4312	23.5	33.1	44.2	53.1	53.1	4312	0.3	1.7	0.9	-0.1	-0.1	1.7	4312	-1.3	0.2	-0.9	1	-1.3	1
4313	24.8	32.9	45.1	52.1	52.1	4313	25.1	34.6	46	52	52	4313	23.5	33.1	44.2	53.1	53.1	4313	0.3	1.7	0.9	-0.1	-0.1	1.7	4313	-1.3	0.2	-0.9	1	-1.3	1
4314	22.9	27.7	34.1	45.1	45.1	4314	22.8	28.1	33.5	45.4	45.4	4314	22.3	27.5	33.8	44.7	44.7	4314	-0.1	0.4	-0.6	0.3	-0.6	0.4	4314	-0.6	-0.2	-0.3	-0.4	-0.6	-0.2
4315	30	30.7	34.1	49.7	49.7	4315	30.3	33.1	34	52.1	52.1	4315	29.7	31.5	32.2	49.3	49.3	4315	0.3	2.4	-0.1	2.4	-0.1	2.4	4315	-0.3	0.8	-1.9	-0.4	-1.9	0.8
4316	33.9	33.8	37.3	50.2	50.2	4316	35.2	36.7	36.6	50.7	50.7	4316	34.2	35.6	36.5	50.6	50.6	4316	1.3	2.9	-0.7	0.5	-0.7	2.9	4316	0.3	1.8	-0.8	0.4	-0.8	1.8
4317	33.9	33.8	37.3	50.2	50.2	4317	35.2	36.7	36.6	50.7	50.7	4317	34.2	35.6	36.5	50.6	50.6	4317	1.3	2.9	-0.7	0.5	-0.7	2.9	4317	0.3	1.8	-0.8	0.4	-0.8	1.8
4318	33.9	33.8	37.3	50.2	50.2	4318	35.2	36.7	36.6	50.7	50.7	4318	34.2	35.6	36.5	50.6	50.6	4318	1.3	2.9	-0.7	0.5	-0.7	2.9	4318	0.3	1.8	-0.8	0.4	-0.8	1.8
4319	17.9	18.8	23.3	43.6	43.6	4319	17.5	19.5	23.6	44.8	44.8	4319	17.6	19.4	21.9	43.3	43.3	4319	-0.4	0.7	0.3	1.2	-0.4	1.2	4319	-0.3	0.6	-1.4	-0.3	-1.4	0.6
4320	17.9	18.8	23.3	43.6	43.6	4320	17.5	19.5	23.6	44.8	44.8	4320	17.6	19.4	21.9	43.3	43.3	4320	-0.4	0.7	0.3	1.2	-0.4	1.2	4320	-0.3	0.6	-1.4	-0.3	-1.4	0.6
4321	17.9	18.8	23.3	43.6	43.6	4321	17.5	19.5	23.6	44.8	44.8	4321	17.6	19.4	21.9	43.3	43.3	4321	-0.4	0.7	0.3	1.2	-0.4	1.2	4321	-0.3	0.6	-1.4	-0.3	-1.4	0.6
4322	17.9	18.8	23.3	43.6	43.6	4322	17.5	19.5	23.6	44.8	44.8	4322	17.6	19.4	21.9	43.3	43.3	4322	-0.4	0.7	0.3	1.2	-0.4	1.2	4322	-0.3	0.6	-1.4	-0.3	-1.4	0.6
4323	16.5	17.9	20.6	23.3	23.3	4323	13.9	14.5	21.6	24.1	24.1	4323	15.3	15.4	21.9	24.8	24.8	4323	-2.6	-3.4	1	0.8	-3.4	1	4323	-1.2	-2.5	1.3	1.5	-2.5	1.5
4324	0	-0.6	-0.6	-0.3	0	4324	-0.2	0.8	-1.4	-1.3	0.8	4324	0.2	0.8	-1.8	0.2	0.8	4324	-0.2	1.4	-0.8	-1	-1	1.4	4324	0.2	1.4	-1.2	0.5	-1.2	1.4
4325	0	-0.6	-0.6	-0.3	0	4325	-0.2	0.8	-1.4	-1.3	0.8	4325	0.2	0.8	-1.8	0.2	0.8	4325	-0.2	1.4	-0.8	-1	-1	1.4	4325	0.2	1.4	-1.2	0.5	-1.2	1.4
4326	0	-0.6	-0.6	-0.3	0	4326	-0.2	0.8	-1.4	-1.3	0.8	4326	0.2	0.8	-1.8	0.2	0.8	4326	-0.2	1.4	-0.8	-1	-1	1.4	4326	0.2	1.4	-1.2	0.5	-1.2	1.4
4327	4.9	5.1	6.8	5.8	6.8	4327	4.5	6.7	7.3	7.4	7.4	4327	5.8	6.6	5.5	6.7	6.7	4327	-0.4	1.6	0.5	1.6	-0.4	1.6	4327	0.9	1.5	-1.3	0.9	-1.3	1.5
4328	2.9	2.8	4.1	3.9	4.1	4328	2.8	5.9	4	6.2	6.2	4328	2.4	3.9	2.8	4.3	4.3	4328	-0.1	3.1	-0.1	2.3	-0.1	3.1	4328	-0.5	1.1	-1.3	0.4	-1.3	1.1
4329	7.2	9.4	9.6	9.7	9.7	4329	8.4	11.2		11.5	11.5	4329	8.2	10.3	10.6	9.6	10.6	4329	1.2	1.8		1.8	1.2	1.8	4329	1	0.9	1	-0.1	-0.1	1
4330	27.7	31.8		35.9	35.9	4330	27.5	32.4	32.5	34.9	34.9	4330	28.4	32	33.3	32.9	33.3	4330	-0.2	0.6		-1	-1	0.6	4330	0.7	0.2		-3	-3	0.7
4331	27.7	31.8		35.9	35.9	4331	27.5	32.4	32.5	34.9	34.9	4331	28.4	32	33.3	32.9	33.3	4331	-0.2	0.6		-1	-1	0.6	4331	0.7	0.2		-3	-3	0.7
4332	27.7	31.8		35.9	35.9	4332	27.5	32.4	32.5	34.9	34.9	4332	28.4	32	33.3	32.9	33.3	4332	-0.2	0.6		-1	-1	0.6	4332	0.7	0.2		-3	-3	0.7
4333	27.7	31.8		35.9	35.9	4333	27.5	32.4	32.5	34.9	34.9	4333	28.4	32	33.3	32.9	33.3	4333	-0.2	0.6		-1	-1	0.6	4333	0.7	0.2		-3	-3	0.7
4334	27.7	31.8		35.9	35.9	4334	27.5	32.4	32.5	34.9	34.9	4334	28.4	32	33.3	32.9	33.3	4334	-0.2	0.6		-1	-1	0.6	4334	0.7	0.2		-3	-3	0.7
4335	28.1	30.1	32.6	36.4	36.4	4335	29.3	31.5	29.4	36.1	36.1	4335	27.9	30.1	29.1	34.6	34.6	4335	1.2	1.4	-3.2	-0.3	-3.2	1.4	4335	-0.2	0	-3.5	-1.8	-3.5	0
4336	8.5	13.3	19.9	25.7	25.7	4336	7.8	13.7	19.1	27.4	27.4	4336	8.1	12.4	19.8	27	27	4336	-0.7	0.4	-0.8	1.7	-0.8	1.7	4336	-0.4	-0.9	-0.1	1.3	-0.9	1.3
4337	8.5	13.3	19.9	25.7	25.7	4337	7.8	13.7	19.1	27.4	27.4	4337	8.1	12.4	19.8	27	27	4337	-0.7	0.4	-0.8	1.7	-0.8	1.7	4337	-0.4	-0.9	-0.1	1.3	-0.9	1.3
4338	8.5	13.3	19.9	25.7	25.7	4338	7.8	13.7	19.1	27.4	27.4	4338	8.1	12.4	19.8	27	27	4338	-0.7	0.4	-0.8	1.7	-0.8	1.7	4338	-0.4	-0.9	-0.1	1.3	-0.9	1.3
4339	13.2	13.3	15	25.2	25.2	4339	13.5	15.1	14.9	24.6	24.6	4339	12.9	14.2	12.3	24.6	24.6	4339	0.3	1.8	-0.1	-0.6	-0.6	1.8	4339	-0.3	0.9	-2.7	-0.6	-2.7	0.9
4340	13.2	13.3	15	25.2	25.2	4340	13.5	15.1	14.9	24.6	24.6	4340	12.9	14.2	12.3	24.6	24.6	4340	0.3	1.8	-0.1	-0.6	-0.6	1.8	4340	-0.3	0.9	-2.7	-0.6	-2.7	0.9
4341	13.2	13.3	15	25.2	25.2	4341	13.5	15.1	14.9	24.6	24.6	4341	12.9	14.2	12.3	24.6	24.6	4341	0.3	1.8	-0.1	-0.6	-0.6	1.8	4341	-0.3	0.9	-2.7	-0.6	-2.7	0.9
4342	13.2	13.3	15	25.2	25.2	4342	13.5	15.1	14.9	24.6	24.6	4342	12.9	14.2	12.3	24.6	24.6	4342	0.3	1.8	-0.1	-0.6	-0.6	1.8	4342	-0.3	0.9	-2.7	-0.6	-2.7	0.9
4343	1.5	1.3	0.5	1.6	1.6	4343	1.8	3.3	2.2	2.3	3.3	4343	1.9	2.2	1.1	1.5	2.2	4343	0.3	2	1.7	0.7	0.3	2	4343	0.4	0.9	0.6	-0.1	-0.1	0.9
4344	1.5	1.3	0.5	1.6	1.6	4344	1.8	3.3	2.2	2.3	3.3	4344	1.9	2.2	1.1	1.5	2.2	4344	0.3	2	1.7	0.7	0.3	2	4344	0.4	0.9	0.6	-0.1	-0.1	0.9
4345	1.5	1.3	0.5	1.6	1.6	4345	1.8	3.3	2.2	2.3	3.3	4345	1.9	2.2	1.1	1.5	2.2	4345	0.3	2	1.7	0.7	0.3	2	4345	0.4	0.9	0.6	-0.1	-0.1	0.9
4346	1.6	1.5	1.7	7.3	7.3	4346	1.8	2	2.4	6.8	6.8	4346	1.7	1.7	3.4	7.2	7.2	4346	0.2	0.5	0.7	-0.5	-0.5	0.7	4346	0.1	0.2	1.7	-0.1	-0.1	1.7
4347	1.6	1.5	1.7	7.3	7.3	4347	1.8	2	2.4	6.8	6.8	4347	1.7	1.7	3.4	7.2	7.2	4347	0.2	0.5	0.7	-0.5	-0.5	0.7	4347	0.1	0.2	1.7	-0.1	-0.1	1.7
4348	1.6	1.5	1.7	7.3	7.3	4348	1.8	2	2.4	6.8	6.8	4348	1.7	1.7	3.4	7.2	7.2	4348	0.2	0.5	0.7	-0.5	-0.5	0.7	4348	0.1	0.2	1.7	-0.1	-0.1	1.7
4349	1.6	1.5	1.7	7.3	7.3	4349	1.8	2	2.4	6.8	6.8	4349	1.7	1.7	3.4	7.2	7.2	4349	0.2	0.5	0.7	-0.5	-0.5	0.7	4349	0.1	0.2	1.7	-0.1	-0.1	1.7
4350	2.3	1.1	2.2	5.6	5.6	4350	-0.1	1.3	1	5.1	5.1	4350	1.3	0.9	0.4	5.8	5.8	4350	-2.4	0.2	-1.2	-0.5	-2.4	0.2	4350	-1	-0.2	-1.8	0.2	-1.8	0.2
4351	19.7	23.6	26.6	32.5	32.5	4351	17.5	23.8	27.3	31.7	31.7	4351	18.8	22.7	27.4	31.8	31.8	4351	-2.2	0.2	0.7	-0.8	-2.2	0.7	4351	-0.9	-0.9	0.8	-0.7	-0.9	0.8
4352	10.2	11	10.8	20	20	4352	11.3	12.9	12.2	21.2	21.2	4352	10.7	11.4	11.3	20.3	20.3	4352	1.1	1.9	1.4	1.2	1.1	1.9	4352	0.5	0.4	0.5	0.3	0.3	0.5
4353	14.3	14.4	14	17.8	17.8	4353	11.9	11.4	13.3	16.6	16.6	4353	13.5	12.7	13.4	16.6	16.6	4353	-2.4	-3	-0.7	-1.2	-3	-0.7	4353	-0.8	-1.7	-0.6	-1.2	-1.7	-0.6
4354						4354						4354						4354							4354
4355	28.7	28.7	27.7	28.2	28.7	4355	27.3	28.7	27.3	27.4	28.7	4355	27.9	28.5	27.4	27.8	28.5	4355	-1.4	0	-0.4	-0.8	-1.4	0	4355	-0.8	-0.2	-0.3	-0.4	-0.8	-0.2
4356	28.7	28.7	27.7	28.2	28.7	4356	27.3	28.7	27.3	27.4	28.7	4356	27.9	28.5	27.4	27.8	28.5	4356	-1.4	0	-0.4	-0.8	-1.4	0	4356	-0.8	-0.2	-0.3	-0.4	-0.8	-0.2
4357	28.7	28.7	27.7	28.2	28.7	4357	27.3	28.7	27.3	27.4	28.7	4357	27.9	28.5	27.4	27.8	28.5	4357	-1.4	0	-0.4	-0.8	-1.4	0	4357	-0.8	-0.2	-0.3	-0.4	-0.8	-0.2
4358	-1.1	-0.7	-2	-0.5	-0.5	4358	-0.3	2.1	-3.5	-0.5	2.1	4358	-0.3	0.2	-4.2	1.1	1.1	4358	0.8	2.8	-1.5	0	-1.5	2.8	4358	0.8	0.9	-2.2	1.6	-2.2	1.6
4359	-1.1	-0.7	-2	-0.5	-0.5	4359	-0.3	2.1	-3.5	-0.5	2.1	4359	-0.3	0.2	-4.2	1.1	1.1	4359	0.8	2.8	-1.5	0	-1.5	2.8	4359	0.8	0.9	-2.2	1.6	-2.2	1.6
4360	-1.1	-0.7	-2	-0.5	-0.5	4360	-0.3	2.1	-3.5	-0.5	2.1	4360	-0.3	0.2	-4.2	1.1	1.1	4360	0.8	2.8	-1.5	0	-1.5	2.8	4360	0.8	0.9	-2.2	1.6	-2.2	1.6
4361	-1.1	-0.7	-2	-0.5	-0.5	4361	-0.3	2.1	-3.5	-0.5	2.1	4361	-0.3	0.2	-4.2	1.1	1.1	4361	0.8	2.8	-1.5	0	-1.5	2.8	4361	0.8	0.9	-2.2	1.6	-2.2	1.6
4362						4362						4362						4362							4362
4363	-1.3	-1	0	1.9	1.9	4363	-1.2	1.4	-2.1	3.6	3.6	4363	-1.2	-0.2	-3.7	2.2	2.2	4363	0.1	2.4	-2.1	1.7	-2.1	2.4	4363	0.1	0.8	-3.7	0.3	-3.7	0.8
4364	-1.3	-1	0	1.9	1.9	4364	-1.2	1.4	-2.1	3.6	3.6	4364	-1.2	-0.2	-3.7	2.2	2.2	4364	0.1	2.4	-2.1	1.7	-2.1	2.4	4364	0.1	0.8	-3.7	0.3	-3.7	0.8
4365	-1.3	-1	0	1.9	1.9	4365	-1.2	1.4	-2.1	3.6	3.6	4365	-1.2	-0.2	-3.7	2.2	2.2	4365	0.1	2.4	-2.1	1.7	-2.1	2.4	4365	0.1	0.8	-3.7	0.3	-3.7	0.8
4366	21.3	21.1	21.1	23	23	4366	21.7	21.7	20.8	22.9	22.9	4366	20.1	20.7	18.5	22.5	22.5	4366	0.4	0.6	-0.3	-0.1	-0.3	0.6	4366	-1.2	-0.4	-2.6	-0.5	-2.6	-0.4
4367	21.3	21.1	21.1	23	23	4367	21.7	21.7	20.8	22.9	22.9	4367	20.1	20.7	18.5	22.5	22.5	4367	0.4	0.6	-0.3	-0.1	-0.3	0.6	4367	-1.2	-0.4	-2.6	-0.5	-2.6	-0.4
4368	41.7	42.2	39.6	40.6	42.2	4368	40.1	41.7	39.5	39.4	41.7	4368	38.7	38.2	41	40	41	4368	-1.6	-0.5	-0.1	-1.2	-1.6	-0.1	4368	-3	-4	1.4	-0.6	-4	1.4
4369	41.7	42.2	39.6	40.6	42.2	4369	40.1	41.7	39.5	39.4	41.7	4369	38.7	38.2	41	40	41	4369	-1.6	-0.5	-0.1	-1.2	-1.6	-0.1	4369	-3	-4	1.4	-0.6	-4	1.4
4370	41.7	42.2	39.6	40.6	42.2	4370	40.1	41.7	39.5	39.4	41.7	4370	38.7	38.2	41	40	41	4370	-1.6	-0.5	-0.1	-1.2	-1.6	-0.1	4370	-3	-4	1.4	-0.6	-4	1.4
4371	41.7	42.2	39.6	40.6	42.2	4371	40.1	41.7	39.5	39.4	41.7	4371	38.7	38.2	41	40	41	4371	-1.6	-0.5	-0.1	-1.2	-1.6	-0.1	4371	-3	-4	1.4	-0.6	-4	1.4
4372	43.5	43	42.1	43.5	43.5	4372	43.1	44.6	42.3	43.4	44.6	4372	43.1	44.4	39.8	44	44.4	4372	-0.4	1.6	0.2	-0.1	-0.4	1.6	4372	-0.4	1.4	-2.3	0.5	-2.3	1.4
4373	43.5	43	42.1	43.5	43.5	4373	43.1	44.6	42.3	43.4	44.6	4373	43.1	44.4	39.8	44	44.4	4373	-0.4	1.6	0.2	-0.1	-0.4	1.6	4373	-0.4	1.4	-2.3	0.5	-2.3	1.4
4374	43.5	43	42.1	43.5	43.5	4374	43.1	44.6	42.3	43.4	44.6	4374	43.1	44.4	39.8	44	44.4	4374	-0.4	1.6	0.2	-0.1	-0.4	1.6	4374	-0.4	1.4	-2.3	0.5	-2.3	1.4

## Sheet: Exp2_HDX_Peptides
Sample	Start	End	Peptide sequence	Maximal uptake (#)	Peptide mass (Da)	Retention time (min)	Retention time SD (min)	HDX time (s)	Uptake (Da)	Uptake SD (Da)	Uptake (%)	Uptake SD (%)
BI8622	3991	3997	GPDFDVK	5	776.37	6.74101	0.005471	0	0	0	0	0
BI8622	3991	3997	GPDFDVK	5	776.37	6.73576	0.00479	10	1.89365	0.057658	37.873	1.15316
BI8622	3991	3997	GPDFDVK	5	776.37	6.73816	0.002202	30	2.00502	0.061549	40.1004	1.23098
BI8622	3991	3997	GPDFDVK	5	776.37	6.72472	0.006655	100	2.15209	0.057002	43.0418	1.14004
BI8622	3991	3997	GPDFDVK	5	776.37	6.72214	0.031442	1000	2.55932	0.110803	51.1864	2.21606
BI8622	3991	3997	GPDFDVK	5	776.37	6.74013	0.000202	10000	2.51573	0.051673	50.3145	1.03346
BI8626	3991	3997	GPDFDVK	5	776.37	6.74774	0.009719	0	0	0	0	0
BI8626	3991	3997	GPDFDVK	5	776.37	6.73967	0.004099	10	1.79731	0.018444	35.9462	0.36888
BI8626	3991	3997	GPDFDVK	5	776.37	6.74035	0.005396	30	2.0028	0.045373	40.056	0.90746
BI8626	3991	3997	GPDFDVK	5	776.37	6.7075	0.035464	100	2.11304	0.045127	42.2608	0.90254
BI8626	3991	3997	GPDFDVK	5	776.37	6.72	0.034946	1000	2.5516	0.065154	51.032	1.30308
BI8626	3991	3997	GPDFDVK	5	776.37	6.69028	0.0366	10000	2.56527	0.061912	51.3053	1.23824
Apo	3991	3997	GPDFDVK	5	776.37	6.74018	0.004071	0	0	0	0	0
Apo	3991	3997	GPDFDVK	5	776.37	6.75291	0.01577	10	1.80695	0.004768	36.139	0.09536
Apo	3991	3997	GPDFDVK	5	776.37	6.73658	0.005361	30	1.9569	0.052122	39.138	1.04244
Apo	3991	3997	GPDFDVK	5	776.37	6.71766	0.021346	100	2.16564	0.068848	43.3128	1.37696
Apo	3991	3997	GPDFDVK	5	776.37	6.74456	0.009356	1000	2.47259	0.011017	49.4517	0.22034
Apo	3991	3997	GPDFDVK	5	776.37	6.66547	0.027886	10000	2.59993	0.044901	51.9986	0.89802
BI8622	3991	4000	GPDFDVKRKY	8	1223.63	6.136	0.001492	0	0	0	0	0
BI8622	3991	4000	GPDFDVKRKY	8	1223.63	6.13059	0.004953	10	1.53637	0.025852	19.2046	0.32315
BI8622	3991	4000	GPDFDVKRKY	8	1223.63	6.13123	0.003841	30	1.68304	0.026924	21.038	0.33655
BI8622	3991	4000	GPDFDVKRKY	8	1223.63	6.1231	0.002062	100	1.96756	0.020098	24.5945	0.251225
BI8622	3991	4000	GPDFDVKRKY	8	1223.63	6.14364	0.004072	1000	2.79426	0.054334	34.9282	0.679175
BI8622	3991	4000	GPDFDVKRKY	8	1223.63	6.13228	0.002426	10000	3.49799	0.038897	43.7249	0.486212
BI8626	3991	4000	GPDFDVKRKY	8	1223.63	6.13826	0.00819	0	0	0	0	0
BI8626	3991	4000	GPDFDVKRKY	8	1223.63	6.13277	0.004195	10	1.51695	0.01393	18.9619	0.174125
BI8626	3991	4000	GPDFDVKRKY	8	1223.63	6.13876	0.002963	30	1.66596	0.008544	20.8246	0.1068
BI8626	3991	4000	GPDFDVKRKY	8	1223.63	6.12666	0.00554	100	1.94033	0.027913	24.2541	0.348913
BI8626	3991	4000	GPDFDVKRKY	8	1223.63	6.14172	0.00314	1000	2.78627	0.036605	34.8284	0.457562
BI8626	3991	4000	GPDFDVKRKY	8	1223.63	6.12256	0.002244	10000	3.57232	0.021053	44.654	0.263162
Apo	3991	4000	GPDFDVKRKY	8	1223.63	6.13233	0.002157	0	0	0	0	0
Apo	3991	4000	GPDFDVKRKY	8	1223.63	6.14607	0.014698	10	1.45926	0.014488	18.2407	0.1811
Apo	3991	4000	GPDFDVKRKY	8	1223.63	6.13373	0.004383	30	1.67556	0.012184	20.9445	0.1523
Apo	3991	4000	GPDFDVKRKY	8	1223.63	6.12895	0.007716	100	1.91379	0.021081	23.9224	0.263512
Apo	3991	4000	GPDFDVKRKY	8	1223.63	6.13892	0.00396	1000	2.85375	0.031197	35.6718	0.389962
Apo	3991	4000	GPDFDVKRKY	8	1223.63	6.11646	0.0048	10000	3.47039	0.009578	43.3799	0.119725
BI8622	3991	4001	GPDFDVKRKYF	9	1370.7	7.26624	0.003905	0	0	0	0	0
BI8622	3991	4001	GPDFDVKRKYF	9	1370.7	7.24807	0.008458	10	1.37658	0.039803	15.2953	0.442256
BI8622	3991	4001	GPDFDVKRKYF	9	1370.7	7.24705	0.00301	30	1.49795	0.014398	16.6439	0.159978
BI8622	3991	4001	GPDFDVKRKYF	9	1370.7	7.23662	0.002226	100	1.71991	0.021922	19.1101	0.243578
BI8622	3991	4001	GPDFDVKRKYF	9	1370.7	7.25399	0.003225	1000	2.57381	0.051104	28.5978	0.567822
BI8622	3991	4001	GPDFDVKRKYF	9	1370.7	7.242	0.001009	10000	3.36045	0.016599	37.3383	0.184433
BI8626	3991	4001	GPDFDVKRKYF	9	1370.7	7.2611	0.008507	0	0	0	0	0
BI8626	3991	4001	GPDFDVKRKYF	9	1370.7	7.24113	0.004674	10	1.28699	0.01538	14.2998	0.170889
BI8626	3991	4001	GPDFDVKRKYF	9	1370.7	7.2487	0.003437	30	1.44525	0.01332	16.0583	0.148
BI8626	3991	4001	GPDFDVKRKYF	9	1370.7	7.23207	0.005881	100	1.67461	0.018923	18.6068	0.210256
BI8626	3991	4001	GPDFDVKRKYF	9	1370.7	7.24871	0.003047	1000	2.53813	0.021269	28.2014	0.236322
BI8626	3991	4001	GPDFDVKRKYF	9	1370.7	7.22882	0.003751	10000	3.34765	0.030144	37.1961	0.334933
Apo	3991	4001	GPDFDVKRKYF	9	1370.7	7.26693	0.00193	0	0	0	0	0
Apo	3991	4001	GPDFDVKRKYF	9	1370.7	7.26343	0.014876	10	1.34126	0.023189	14.9029	0.257656
Apo	3991	4001	GPDFDVKRKYF	9	1370.7	7.25371	0.002628	30	1.46241	0.023124	16.249	0.256933
Apo	3991	4001	GPDFDVKRKYF	9	1370.7	7.24575	0.008129	100	1.68824	0.011577	18.7583	0.128633
Apo	3991	4001	GPDFDVKRKYF	9	1370.7	7.25191	0.005429	1000	2.60207	0.032071	28.9118	0.356344
Apo	3991	4001	GPDFDVKRKYF	9	1370.7	7.23084	0.006441	10000	3.33971	0.032515	37.1079	0.361278
BI8622	3991	4004	GPDFDVKRKYFRQE	12	1783.9	6.52003	0.00457	0	0	0	0	0
BI8622	3991	4004	GPDFDVKRKYFRQE	12	1783.9	6.54496	0.002637	10	1.43013	0.034638	11.9177	0.28865
BI8622	3991	4004	GPDFDVKRKYFRQE	12	1783.9	6.54992	0.009325	30	1.55455	0.028234	12.9546	0.235283
BI8622	3991	4004	GPDFDVKRKYFRQE	12	1783.9	6.54561	0.003363	100	1.86379	0.028287	15.5316	0.235725
BI8622	3991	4004	GPDFDVKRKYFRQE	12	1783.9	6.53661	0.007784	1000	2.83723	0.029175	23.6436	0.243125
BI8622	3991	4004	GPDFDVKRKYFRQE	12	1783.9	6.5418	0.003763	10000	3.94571	0.021816	32.881	0.1818
BI8626	3991	4004	GPDFDVKRKYFRQE	12	1783.9	6.52307	0.003176	0	0	0	0	0
BI8626	3991	4004	GPDFDVKRKYFRQE	12	1783.9	6.54597	0.009616	10	1.40667	0.074367	11.7222	0.619725
BI8626	3991	4004	GPDFDVKRKYFRQE	12	1783.9	6.55084	0.009036	30	1.55877	0.026516	12.9898	0.220967
BI8626	3991	4004	GPDFDVKRKYFRQE	12	1783.9	6.54686	0.005148	100	1.86097	0.043042	15.5081	0.358683
BI8626	3991	4004	GPDFDVKRKYFRQE	12	1783.9	6.53282	0.003548	1000	2.86802	0.012943	23.9002	0.107858
BI8626	3991	4004	GPDFDVKRKYFRQE	12	1783.9	6.5489	0.002172	10000	3.95711	0.043751	32.9759	0.364592
Apo	3991	4004	GPDFDVKRKYFRQE	12	1783.9	6.51906	0.003027	0	0	0	0	0
Apo	3991	4004	GPDFDVKRKYFRQE	12	1783.9	6.544	0.007182	10	1.44665	0.038149	12.0554	0.317908
Apo	3991	4004	GPDFDVKRKYFRQE	12	1783.9	6.55348	0.005884	30	1.56227	0.032833	13.0189	0.273608
Apo	3991	4004	GPDFDVKRKYFRQE	12	1783.9	6.54685	0.005602	100	1.81895	0.048208	15.1579	0.401733
Apo	3991	4004	GPDFDVKRKYFRQE	12	1783.9	6.54229	0.003094	1000	2.83191	0.031063	23.5992	0.258858
Apo	3991	4004	GPDFDVKRKYFRQE	12	1783.9	6.52977	0.007757	10000	3.86565	0.032624	32.2137	0.271867
BI8622	3991	4017	GPDFDVKRKYFRQELERLDEGLRKEDM	25	3368.69	8.17606	0.004014	0	0	0	0	0
BI8622	3991	4017	GPDFDVKRKYFRQELERLDEGLRKEDM	25	3368.69	8.20469	0.007629	10	4.62552	0.050343	18.5021	0.201372
BI8622	3991	4017	GPDFDVKRKYFRQELERLDEGLRKEDM	25	3368.69	8.20588	0.017388	30	5.25075	0.023337	21.003	0.093348
BI8622	3991	4017	GPDFDVKRKYFRQELERLDEGLRKEDM	25	3368.69	8.19772	0.016315	100	6.07564	0.140492	24.3026	0.561968
BI8622	3991	4017	GPDFDVKRKYFRQELERLDEGLRKEDM	25	3368.69	8.19642	0.009763	1000	8.36069	0.007349	33.4428	0.029396
BI8622	3991	4017	GPDFDVKRKYFRQELERLDEGLRKEDM	25	3368.69	8.20582	0.004812	10000	10.0635	0.014685	40.254	0.05874
BI8626	3991	4017	GPDFDVKRKYFRQELERLDEGLRKEDM	25	3368.69	8.18299	0.00264	0	0	0	0	0
BI8626	3991	4017	GPDFDVKRKYFRQELERLDEGLRKEDM	25	3368.69	8.20859	0.031976	10	4.6034	0.095804	18.4136	0.383216
BI8626	3991	4017	GPDFDVKRKYFRQELERLDEGLRKEDM	25	3368.69	8.21981	0.04695	30	5.24071	0.033506	20.9628	0.134024
BI8626	3991	4017	GPDFDVKRKYFRQELERLDEGLRKEDM	25	3368.69	8.2159	0.025067	100	6.18506	0.050512	24.7402	0.202048
BI8626	3991	4017	GPDFDVKRKYFRQELERLDEGLRKEDM	25	3368.69	8.20096	0.003478	1000	8.37309	0.017375	33.4924	0.0695
BI8626	3991	4017	GPDFDVKRKYFRQELERLDEGLRKEDM	25	3368.69	8.21032	0.003438	10000	10.2287	0.11044	40.9146	0.44176
Apo	3991	4017	GPDFDVKRKYFRQELERLDEGLRKEDM	25	3368.69	8.17594	0.004346	0	0	0	0	0
Apo	3991	4017	GPDFDVKRKYFRQELERLDEGLRKEDM	25	3368.69	8.21102	0.032022	10	4.55545	0.14304	18.2218	0.57216
Apo	3991	4017	GPDFDVKRKYFRQELERLDEGLRKEDM	25	3368.69	8.20971	0.019153	30	5.26875	0.04169	21.075	0.16676
Apo	3991	4017	GPDFDVKRKYFRQELERLDEGLRKEDM	25	3368.69	8.21247	0.019751	100	6.04096	0.126866	24.1638	0.507464
Apo	3991	4017	GPDFDVKRKYFRQELERLDEGLRKEDM	25	3368.69	8.20144	0.007693	1000	8.36069	0.04204	33.4428	0.16816
Apo	3991	4017	GPDFDVKRKYFRQELERLDEGLRKEDM	25	3368.69	8.19313	0.007518	10000	10.1303	0.141824	40.5212	0.567296
BI8622	3994	3998	FDVKR	4	663.37	5.26029	0.002903	0	0	0	0	0
BI8622	3994	3998	FDVKR	4	663.37	5.23681	0.004361	10	0.807969	0.011514	20.1992	0.28785
BI8622	3994	3998	FDVKR	4	663.37	5.23904	0.005135	30	0.948456	0.015156	23.7114	0.3789
BI8622	3994	3998	FDVKR	4	663.37	5.22776	0.004976	100	1.24362	0.014263	31.0905	0.356575
BI8622	3994	3998	FDVKR	4	663.37	5.2418	0.005184	1000	1.67622	0.018291	41.9056	0.457275
BI8622	3994	3998	FDVKR	4	663.37	5.23751	0.003139	10000	2.02096	0.013186	50.5241	0.32965
BI8626	3994	3998	FDVKR	4	663.37	5.26611	0.00877	0	0	0	0	0
BI8626	3994	3998	FDVKR	4	663.37	5.24235	0.004492	10	0.774321	0.02055	19.358	0.51375
BI8626	3994	3998	FDVKR	4	663.37	5.24361	0.001191	30	0.939369	0.020608	23.4842	0.5152
BI8626	3994	3998	FDVKR	4	663.37	5.23369	0.007497	100	1.20041	0.019157	30.0103	0.478925
BI8626	3994	3998	FDVKR	4	663.37	5.24653	0.001734	1000	1.68365	0.020021	42.0913	0.500525
BI8626	3994	3998	FDVKR	4	663.37	5.22584	0.0033	10000	2.03337	0.01934	50.8343	0.4835
Apo	3994	3998	FDVKR	4	663.37	5.26189	0.001663	0	0	0	0	0
Apo	3994	3998	FDVKR	4	663.37	5.26302	0.020937	10	0.743796	0.042647	18.5949	1.06617
Apo	3994	3998	FDVKR	4	663.37	5.23973	0.006529	30	0.892526	0.041726	22.3132	1.04315
Apo	3994	3998	FDVKR	4	663.37	5.23758	0.008129	100	1.17224	0.04031	29.306	1.00775
Apo	3994	3998	FDVKR	4	663.37	5.2423	0.004872	1000	1.63784	0.042523	40.9461	1.06307
Apo	3994	3998	FDVKR	4	663.37	5.22164	0.001499	10000	1.96763	0.040302	49.1909	1.00755
BI8622	3994	3999	FDVKRK	5	791.465	4.62784	0.002874	0	0	0	0	0
BI8622	3994	3999	FDVKRK	5	791.465	4.59047	0.005043	10	0.52754	0.006417	10.5508	0.12834
BI8622	3994	3999	FDVKRK	5	791.465	4.59124	0.003672	30	0.654922	0.013901	13.0984	0.27802
BI8622	3994	3999	FDVKRK	5	791.465	4.58161	0.004938	100	0.897875	0.020841	17.9575	0.41682
BI8622	3994	3999	FDVKRK	5	791.465	4.59241	0.005635	1000	1.58276	0.018001	31.6551	0.36002
BI8622	3994	3999	FDVKRK	5	791.465	4.58758	0.002776	10000	2.06935	0.02502	41.387	0.5004
BI8626	3994	3999	FDVKRK	5	791.465	4.62966	0.008128	0	0	0	0	0
BI8626	3994	3999	FDVKRK	5	791.465	4.59291	0.003809	10	0.523774	0.013673	10.4755	0.27346
BI8626	3994	3999	FDVKRK	5	791.465	4.59855	0.002277	30	0.634644	0.012317	12.6929	0.24634
BI8626	3994	3999	FDVKRK	5	791.465	4.58619	0.004944	100	0.906581	0.00523	18.1316	0.1046
BI8626	3994	3999	FDVKRK	5	791.465	4.59735	0.002307	1000	1.61883	0.016426	32.3765	0.32852
BI8626	3994	3999	FDVKRK	5	791.465	4.57819	0.003829	10000	2.08221	0.013132	41.6443	0.26264
Apo	3994	3999	FDVKRK	5	791.465	4.62476	0.001657	0	0	0	0	0
Apo	3994	3999	FDVKRK	5	791.465	4.61896	0.022701	10	0.524233	0.020816	10.4847	0.41632
Apo	3994	3999	FDVKRK	5	791.465	4.59329	0.005418	30	0.63007	0.021504	12.6014	0.43008
Apo	3994	3999	FDVKRK	5	791.465	4.58875	0.007652	100	0.890281	0.024748	17.8056	0.49496
Apo	3994	3999	FDVKRK	5	791.465	4.59241	0.005454	1000	1.56678	0.023666	31.3357	0.47332
Apo	3994	3999	FDVKRK	5	791.465	4.57142	0.000931	10000	2.10361	0.025386	42.0722	0.50772
BI8622	3994	4000	FDVKRKY	6	954.528	5.53134	0.002988	0	0	0	0	0
BI8622	3994	4000	FDVKRKY	6	954.528	5.50626	0.005617	10	0.697777	0.013237	11.6296	0.220617
BI8622	3994	4000	FDVKRKY	6	954.528	5.51021	0.002512	30	0.838782	0.00878	13.9797	0.146333
BI8622	3994	4000	FDVKRKY	6	954.528	5.49693	0.005029	100	1.16763	0.015936	19.4605	0.2656
BI8622	3994	4000	FDVKRKY	6	954.528	5.51039	0.004259	1000	2.13527	0.013099	35.5879	0.218317
BI8622	3994	4000	FDVKRKY	6	954.528	5.50513	0.001977	10000	2.82923	0.012034	47.1538	0.200567
BI8626	3994	4000	FDVKRKY	6	954.528	5.53694	0.007545	0	0	0	0	0
BI8626	3994	4000	FDVKRKY	6	954.528	5.51129	0.005012	10	0.698644	0.046941	11.6441	0.78235
BI8626	3994	4000	FDVKRKY	6	954.528	5.51955	0.003662	30	0.844148	0.028356	14.0691	0.4726
BI8626	3994	4000	FDVKRKY	6	954.528	5.50082	0.006749	100	1.16082	0.028829	19.3469	0.480483
BI8626	3994	4000	FDVKRKY	6	954.528	5.51488	0.003259	1000	2.15951	0.027121	35.9919	0.452017
BI8626	3994	4000	FDVKRKY	6	954.528	5.495	0.001489	10000	2.87839	0.026655	47.9731	0.44425
Apo	3994	4000	FDVKRKY	6	954.528	5.52806	0.002143	0	0	0	0	0
Apo	3994	4000	FDVKRKY	6	954.528	5.53271	0.021339	10	0.637652	0.015282	10.6275	0.2547
Apo	3994	4000	FDVKRKY	6	954.528	5.51524	0.006275	30	0.791339	0.00879	13.189	0.1465
Apo	3994	4000	FDVKRKY	6	954.528	5.50688	0.007178	100	1.12832	0.010374	18.8053	0.1729
Apo	3994	4000	FDVKRKY	6	954.528	5.51586	0.006815	1000	2.1071	0.011351	35.1183	0.189183
Apo	3994	4000	FDVKRKY	6	954.528	5.4873	0.001514	10000	2.79501	0.019653	46.5835	0.32755
BI8622	3994	4001	FDVKRKYF	7	1101.6	6.92553	0.007125	0	0	0	0	0
BI8622	3994	4001	FDVKRKYF	7	1101.6	6.88862	0.007978	10	0.461141	0.020388	6.58773	0.291257
BI8622	3994	4001	FDVKRKYF	7	1101.6	6.88948	0.001969	30	0.581002	0.020078	8.30003	0.286829
BI8622	3994	4001	FDVKRKYF	7	1101.6	6.87708	0.003576	100	0.839367	0.019028	11.991	0.271829
BI8622	3994	4001	FDVKRKYF	7	1101.6	6.89915	0.004551	1000	1.72398	0.051018	24.6283	0.728829
BI8622	3994	4001	FDVKRKYF	7	1101.6	6.882	0.000715	10000	2.45249	0.021879	35.0356	0.312557
BI8626	3994	4001	FDVKRKYF	7	1101.6	6.9187	0.003259	0	0	0	0	0
BI8626	3994	4001	FDVKRKYF	7	1101.6	6.88721	0.006397	10	0.453986	0.015411	6.48551	0.220157
BI8626	3994	4001	FDVKRKYF	7	1101.6	6.89496	0.00419	30	0.532093	0.016346	7.60133	0.233514
BI8626	3994	4001	FDVKRKYF	7	1101.6	6.87465	0.004021	100	0.834837	0.013495	11.9262	0.192786
BI8626	3994	4001	FDVKRKYF	7	1101.6	6.89826	0.005419	1000	1.73294	0.036555	24.7562	0.522214
BI8626	3994	4001	FDVKRKYF	7	1101.6	6.87423	0.002391	10000	2.47944	0.017872	35.4206	0.255314
Apo	3994	4001	FDVKRKYF	7	1101.6	6.92202	0.00788	0	0	0	0	0
Apo	3994	4001	FDVKRKYF	7	1101.6	6.90546	0.016052	10	0.449872	0.018819	6.42674	0.268843
Apo	3994	4001	FDVKRKYF	7	1101.6	6.89462	0.003703	30	0.584314	0.012347	8.34734	0.176386
Apo	3994	4001	FDVKRKYF	7	1101.6	6.88466	0.007723	100	0.820595	0.012456	11.7228	0.177943
Apo	3994	4001	FDVKRKYF	7	1101.6	6.89729	0.004608	1000	1.80036	0.011486	25.7195	0.164086
Apo	3994	4001	FDVKRKYF	7	1101.6	6.8692	0.005722	10000	2.45937	0.010748	35.1339	0.153543
BI8622	3994	4004	FDVKRKYFRQE	10	1514.8	6.08428	0.002963	0	0	0	0	0
BI8622	3994	4004	FDVKRKYFRQE	10	1514.8	6.07424	0.009236	10	0.983834	0.028869	9.83834	0.28869
BI8622	3994	4004	FDVKRKYFRQE	10	1514.8	6.0692	0.003962	30	1.10936	0.012898	11.0936	0.12898
BI8622	3994	4004	FDVKRKYFRQE	10	1514.8	6.06367	0.003289	100	1.41587	0.030467	14.1587	0.30467
BI8622	3994	4004	FDVKRKYFRQE	10	1514.8	6.08124	0.006684	1000	2.31381	0.084638	23.1381	0.84638
BI8622	3994	4004	FDVKRKYFRQE	10	1514.8	6.06927	0.001902	10000	3.54104	0.02014	35.4104	0.2014
BI8626	3994	4004	FDVKRKYFRQE	10	1514.8	6.08958	0.008096	0	0	0	0	0
BI8626	3994	4004	FDVKRKYFRQE	10	1514.8	6.07267	0.002387	10	0.92316	0.011149	9.2316	0.11149
BI8626	3994	4004	FDVKRKYFRQE	10	1514.8	6.08389	0.00347	30	1.07938	0.018282	10.7938	0.18282
BI8626	3994	4004	FDVKRKYFRQE	10	1514.8	6.06524	0.005044	100	1.41961	0.014731	14.1961	0.14731
BI8626	3994	4004	FDVKRKYFRQE	10	1514.8	6.08014	0.008364	1000	2.35438	0.041931	23.5438	0.41931
BI8626	3994	4004	FDVKRKYFRQE	10	1514.8	6.06069	0.002498	10000	3.51974	0.023019	35.1974	0.23019
Apo	3994	4004	FDVKRKYFRQE	10	1514.8	6.086	0.00156	0	0	0	0	0
Apo	3994	4004	FDVKRKYFRQE	10	1514.8	6.08544	0.014533	10	0.976345	0.022673	9.76345	0.22673
Apo	3994	4004	FDVKRKYFRQE	10	1514.8	6.07657	0.000803	30	1.12088	0.020025	11.2088	0.20025
Apo	3994	4004	FDVKRKYFRQE	10	1514.8	6.06817	0.006189	100	1.40221	0.030764	14.0221	0.30764
Apo	3994	4004	FDVKRKYFRQE	10	1514.8	6.07409	0.003291	1000	2.37689	0.029811	23.7689	0.29811
Apo	3994	4004	FDVKRKYFRQE	10	1514.8	6.05541	0.006293	10000	3.51515	0.047162	35.1515	0.47162
BI8622	3994	4005	FDVKRKYFRQEL	11	1627.88	7.04411	0.00081	0	0	0	0	0
BI8622	3994	4005	FDVKRKYFRQEL	11	1627.88	7.07205	0.001082	10	1.04893	0.03454	9.53568	0.314
BI8622	3994	4005	FDVKRKYFRQEL	11	1627.88	7.07528	0.009011	30	1.25338	0.022359	11.3943	0.203264
BI8622	3994	4005	FDVKRKYFRQEL	11	1627.88	7.0644	0.004453	100	1.55787	0.059156	14.1624	0.537782
BI8622	3994	4005	FDVKRKYFRQEL	11	1627.88	7.05876	0.007529	1000	2.62954	0.027342	23.905	0.248564
BI8622	3994	4005	FDVKRKYFRQEL	11	1627.88	7.0718	0.004776	10000	3.62432	0.034513	32.9484	0.313755
BI8626	3994	4005	FDVKRKYFRQEL	11	1627.88	7.05392	0.001477	0	0	0	0	0
BI8626	3994	4005	FDVKRKYFRQEL	11	1627.88	7.06758	0.009233	10	1.07268	0.093869	9.75166	0.853355
BI8626	3994	4005	FDVKRKYFRQEL	11	1627.88	7.07188	0.010074	30	1.28664	0.058701	11.6967	0.533645
BI8626	3994	4005	FDVKRKYFRQEL	11	1627.88	7.07104	0.007728	100	1.63133	0.034938	14.8302	0.317618
BI8626	3994	4005	FDVKRKYFRQEL	11	1627.88	7.05722	0.002188	1000	2.64988	0.036569	24.0898	0.332445
BI8626	3994	4005	FDVKRKYFRQEL	11	1627.88	7.0742	0.002829	10000	3.72032	0.036094	33.8211	0.328127
Apo	3994	4005	FDVKRKYFRQEL	11	1627.88	7.04225	0.006252	0	0	0	0	0
Apo	3994	4005	FDVKRKYFRQEL	11	1627.88	7.067	0.010005	10	1.0245	0.056024	9.31362	0.509309
Apo	3994	4005	FDVKRKYFRQEL	11	1627.88	7.07988	0.003998	30	1.26034	0.069488	11.4577	0.631709
Apo	3994	4005	FDVKRKYFRQEL	11	1627.88	7.0708	0.009653	100	1.59036	0.011766	14.4579	0.106964
Apo	3994	4005	FDVKRKYFRQEL	11	1627.88	7.07385	0.004947	1000	2.62564	0.027577	23.8695	0.2507
Apo	3994	4005	FDVKRKYFRQEL	11	1627.88	7.05794	0.008354	10000	3.56998	0.020964	32.4544	0.190582
BI8622	3995	4000	DVKRKY	5	807.46	5.5317	0.002342	0	0	0	0	0
BI8622	3995	4000	DVKRKY	5	807.46	5.50946	0.005558	10	0.542528	0.012888	10.8506	0.25776
BI8622	3995	4000	DVKRKY	5	807.46	5.51228	0.00286	30	0.651022	0.016074	13.0204	0.32148
BI8622	3995	4000	DVKRKY	5	807.46	5.50092	0.004982	100	0.917149	0.011281	18.343	0.22562
BI8622	3995	4000	DVKRKY	5	807.46	5.51333	0.004273	1000	1.78018	0.020116	35.6035	0.40232
BI8622	3995	4000	DVKRKY	5	807.46	5.50762	0.002526	10000	2.40183	0.01335	48.0365	0.267
BI8626	3995	4000	DVKRKY	5	807.46	5.53566	0.007989	0	0	0	0	0
BI8626	3995	4000	DVKRKY	5	807.46	5.51231	0.005287	10	0.51413	0.010812	10.2826	0.21624
BI8626	3995	4000	DVKRKY	5	807.46	5.52333	0.002435	30	0.63971	0.008086	12.7942	0.16172
BI8626	3995	4000	DVKRKY	5	807.46	5.50492	0.005673	100	0.909766	0.00841	18.1953	0.1682
BI8626	3995	4000	DVKRKY	5	807.46	5.51777	0.003641	1000	1.78655	0.020628	35.731	0.41256
BI8626	3995	4000	DVKRKY	5	807.46	5.49869	0.003132	10000	2.38828	0.008369	47.7656	0.16738
Apo	3995	4000	DVKRKY	5	807.46	5.53122	0.003015	0	0	0	0	0
Apo	3995	4000	DVKRKY	5	807.46	5.53603	0.021114	10	0.535684	0.025531	10.7137	0.51062
Apo	3995	4000	DVKRKY	5	807.46	5.5177	0.004775	30	0.625067	0.018334	12.5013	0.36668
Apo	3995	4000	DVKRKY	5	807.46	5.5078	0.00766	100	0.914934	0.019336	18.2987	0.38672
Apo	3995	4000	DVKRKY	5	807.46	5.51607	0.005294	1000	1.77475	0.020808	35.4949	0.41616
Apo	3995	4000	DVKRKY	5	807.46	5.4908	0.001205	10000	2.41713	0.021478	48.3425	0.42956
BI8622	4001	4005	FRQEL	4	691.365	6.72934	0.033926	0	0	0	0	0
BI8622	4001	4005	FRQEL	4	691.365	6.71789	0.005273	10	0.101877	0.023956	2.54692	0.5989
BI8622	4001	4005	FRQEL	4	691.365	6.71985	0.004194	30	0.111815	0.017399	2.79537	0.434975
BI8622	4001	4005	FRQEL	4	691.365	6.70629	0.007332	100	0.111538	0.017571	2.78845	0.439275
BI8622	4001	4005	FRQEL	4	691.365	6.72501	0.003011	1000	0.158195	0.025482	3.95487	0.63705
BI8622	4001	4005	FRQEL	4	691.365	6.71915	0.000408	10000	0.582774	0.018896	14.5694	0.4724
BI8626	4001	4005	FRQEL	4	691.365	6.72884	0.010173	0	0	0	0	0
BI8626	4001	4005	FRQEL	4	691.365	6.72094	0.003624	10	0.122269	0.017125	3.05673	0.428125
BI8626	4001	4005	FRQEL	4	691.365	6.72535	0.003315	30	0.102149	0.016042	2.55373	0.40105
BI8626	4001	4005	FRQEL	4	691.365	6.71511	0.006639	100	0.116251	0.017877	2.90627	0.446925
BI8626	4001	4005	FRQEL	4	691.365	6.72945	0.001493	1000	0.160877	0.028953	4.02192	0.723825
BI8626	4001	4005	FRQEL	4	691.365	6.70948	0.002052	10000	0.578279	0.015252	14.457	0.3813
Apo	4001	4005	FRQEL	4	691.365	6.72864	0.036772	0	0	0	0	0
Apo	4001	4005	FRQEL	4	691.365	6.73524	0.014273	10	0.126542	0.031925	3.16355	0.798125
Apo	4001	4005	FRQEL	4	691.365	6.72119	0.004081	30	0.089473	0.032972	2.23683	0.8243
Apo	4001	4005	FRQEL	4	691.365	6.71748	0.006646	100	0.121048	0.028888	3.0262	0.7222
Apo	4001	4005	FRQEL	4	691.365	6.72843	0.004473	1000	0.168435	0.030037	4.21087	0.750925
Apo	4001	4005	FRQEL	4	691.365	6.7035	0.004349	10000	0.577484	0.029628	14.4371	0.7407
BI8622	4005	4010	LERLDE	5	773.391	6.14294	0.00271	0	0	0	0	0
BI8622	4005	4010	LERLDE	5	773.391	6.12499	0.003613	10	0.441322	0.036278	8.82644	0.72556
BI8622	4005	4010	LERLDE	5	773.391	6.12859	0.004364	30	0.62328	0.03197	12.4656	0.6394
BI8622	4005	4010	LERLDE	5	773.391	6.11634	0.005521	100	0.924382	0.030867	18.4876	0.61734
BI8622	4005	4010	LERLDE	5	773.391	6.13262	0.006401	1000	1.63425	0.033735	32.6849	0.6747
BI8622	4005	4010	LERLDE	5	773.391	6.12784	0.002478	10000	1.82896	0.031007	36.5792	0.62014
BI8626	4005	4010	LERLDE	5	773.391	6.1465	0.008646	0	0	0	0	0
BI8626	4005	4010	LERLDE	5	773.391	6.13026	0.005244	10	0.498329	0.035057	9.96658	0.70114
BI8626	4005	4010	LERLDE	5	773.391	6.13463	0.001111	30	0.677147	0.02223	13.5429	0.4446
BI8626	4005	4010	LERLDE	5	773.391	6.1238	0.005506	100	0.976431	0.026153	19.5286	0.52306
BI8626	4005	4010	LERLDE	5	773.391	6.13809	0.002707	1000	1.693	0.02745	33.86	0.549
BI8626	4005	4010	LERLDE	5	773.391	6.11604	0.002317	10000	1.86774	0.022728	37.3548	0.45456
Apo	4005	4010	LERLDE	5	773.391	6.14212	0.002163	0	0	0	0	0
Apo	4005	4010	LERLDE	5	773.391	6.1498	0.019343	10	0.487327	0.02856	9.74654	0.5712
Apo	4005	4010	LERLDE	5	773.391	6.12847	0.007442	30	0.639976	0.007628	12.7995	0.15256
Apo	4005	4010	LERLDE	5	773.391	6.12758	0.007897	100	0.942379	0.013323	18.8476	0.26646
Apo	4005	4010	LERLDE	5	773.391	6.13756	0.006764	1000	1.66976	0.011209	33.3951	0.22418
Apo	4005	4010	LERLDE	5	773.391	6.11061	0.001493	10000	1.84632	0.014924	36.9263	0.29848
BI8622	4005	4011	LERLDEG	6	830.413	6.11716	0.002418	0	0	0	0	0
BI8622	4005	4011	LERLDEG	6	830.413	6.09944	0.003183	10	1.19982	0.023552	19.9969	0.392533
BI8622	4005	4011	LERLDEG	6	830.413	6.10176	0.003663	30	1.38217	0.010517	23.0361	0.175283
BI8622	4005	4011	LERLDEG	6	830.413	6.09063	0.00489	100	1.65424	0.012554	27.5706	0.209233
BI8622	4005	4011	LERLDEG	6	830.413	6.10464	0.005245	1000	2.37434	0.021445	39.5723	0.357417
BI8622	4005	4011	LERLDEG	6	830.413	6.10125	0.001959	10000	2.53372	0.018369	42.2287	0.30615
BI8626	4005	4011	LERLDEG	6	830.413	6.1217	0.009371	0	0	0	0	0
BI8626	4005	4011	LERLDEG	6	830.413	6.10341	0.004472	10	1.26084	0.033758	21.0141	0.562633
BI8626	4005	4011	LERLDEG	6	830.413	6.1082	0.001526	30	1.47204	0.033562	24.534	0.559367
BI8626	4005	4011	LERLDEG	6	830.413	6.09802	0.004987	100	1.72775	0.034467	28.7959	0.57445
BI8626	4005	4011	LERLDEG	6	830.413	6.11076	0.002754	1000	2.42015	0.033721	40.3359	0.562017
BI8626	4005	4011	LERLDEG	6	830.413	6.09074	0.002844	10000	2.59965	0.031074	43.3274	0.5179
Apo	4005	4011	LERLDEG	6	830.413	6.11718	0.002576	0	0	0	0	0
Apo	4005	4011	LERLDEG	6	830.413	6.12257	0.018388	10	1.20932	0.019758	20.1553	0.3293
Apo	4005	4011	LERLDEG	6	830.413	6.10303	0.00543	30	1.40064	0.012145	23.3441	0.202417
Apo	4005	4011	LERLDEG	6	830.413	6.10076	0.007248	100	1.67512	0.01699	27.9186	0.283167
Apo	4005	4011	LERLDEG	6	830.413	6.10971	0.005402	1000	2.35053	0.035396	39.1754	0.589933
Apo	4005	4011	LERLDEG	6	830.413	6.08513	0.002381	10000	2.56376	0.018572	42.7293	0.309533
BI8622	4005	4016	LERLDEGLRKED	11	1471.76	6.21361	0.001171	0	0	0	0	0
BI8622	4005	4016	LERLDEGLRKED	11	1471.76	6.18329	0.005551	10	2.9107	0.023419	26.4609	0.2129
BI8622	4005	4016	LERLDEGLRKED	11	1471.76	6.1813	0.005943	30	3.29397	0.033458	29.9452	0.304164
BI8622	4005	4016	LERLDEGLRKED	11	1471.76	6.17158	0.002812	100	3.71632	0.023269	33.7847	0.211536
BI8622	4005	4016	LERLDEGLRKED	11	1471.76	6.19074	0.003499	1000	4.27285	0.063035	38.8441	0.573045
BI8622	4005	4016	LERLDEGLRKED	11	1471.76	6.18453	0.003122	10000	4.55982	0.039347	41.4529	0.3577
BI8626	4005	4016	LERLDEGLRKED	11	1471.76	6.21311	0.00566	0	0	0	0	0
BI8626	4005	4016	LERLDEGLRKED	11	1471.76	6.18605	0.004285	10	3.01412	0.043589	27.4011	0.396264
BI8626	4005	4016	LERLDEGLRKED	11	1471.76	6.18982	0.002542	30	3.4138	0.042222	31.0346	0.383836
BI8626	4005	4016	LERLDEGLRKED	11	1471.76	6.17413	0.005861	100	3.82538	0.048218	34.7762	0.438345
BI8626	4005	4016	LERLDEGLRKED	11	1471.76	6.19341	0.003422	1000	4.42481	0.151527	40.2255	1.37752
BI8626	4005	4016	LERLDEGLRKED	11	1471.76	6.17442	0.00288	10000	4.62273	0.044897	42.0248	0.408155
Apo	4005	4016	LERLDEGLRKED	11	1471.76	6.21037	0.002044	0	0	0	0	0
Apo	4005	4016	LERLDEGLRKED	11	1471.76	6.20319	0.0182	10	2.96559	0.039843	26.96	0.362209
Apo	4005	4016	LERLDEGLRKED	11	1471.76	6.18646	0.004989	30	3.3525	0.028544	30.4773	0.259491
Apo	4005	4016	LERLDEGLRKED	11	1471.76	6.1802	0.008204	100	3.75988	0.027626	34.1807	0.251145
Apo	4005	4016	LERLDEGLRKED	11	1471.76	6.19215	0.005945	1000	4.43742	0.035733	40.3401	0.324845
Apo	4005	4016	LERLDEGLRKED	11	1471.76	6.16676	0.006709	10000	4.57819	0.043479	41.6199	0.395264
BI8622	4006	4012	ERLDEGL	6	830.413	7.1489	0.002823	0	0	0	0	0
BI8622	4006	4012	ERLDEGL	6	830.413	7.18503	0.00451	10	1.57615	0.009896	26.2692	0.164933
BI8622	4006	4012	ERLDEGL	6	830.413	7.18911	0.00936	30	1.82889	0.017768	30.4816	0.296133
BI8622	4006	4012	ERLDEGL	6	830.413	7.16677	0.002815	100	2.0666	0.01071	34.4433	0.1785
BI8622	4006	4012	ERLDEGL	6	830.413	7.1642	0.006461	1000	2.40289	0.009852	40.0482	0.1642
BI8622	4006	4012	ERLDEGL	6	830.413	7.17028	0.001557	10000	2.38356	0.015246	39.726	0.2541
BI8626	4006	4012	ERLDEGL	6	830.413	7.15857	0.005405	0	0	0	0	0
BI8626	4006	4012	ERLDEGL	6	830.413	7.18005	0.007068	10	1.53943	0.028361	25.6571	0.472683
BI8626	4006	4012	ERLDEGL	6	830.413	7.18219	0.005146	30	1.81027	0.024291	30.1712	0.40485
BI8626	4006	4012	ERLDEGL	6	830.413	7.17377	0.006597	100	2.04701	0.032347	34.1169	0.539117
BI8626	4006	4012	ERLDEGL	6	830.413	7.15799	0.003706	1000	2.37757	0.027323	39.6261	0.455383
BI8626	4006	4012	ERLDEGL	6	830.413	7.17474	0.002722	10000	2.39313	0.0309	39.8854	0.515
Apo	4006	4012	ERLDEGL	6	830.413	7.14612	0.0033	0	0	0	0	0
Apo	4006	4012	ERLDEGL	6	830.413	7.18257	0.007615	10	1.53871	0.051164	25.6451	0.852733
Apo	4006	4012	ERLDEGL	6	830.413	7.18635	0.004919	30	1.82057	0.019827	30.3428	0.33045
Apo	4006	4012	ERLDEGL	6	830.413	7.17572	0.008348	100	2.04294	0.025843	34.0491	0.430717
Apo	4006	4012	ERLDEGL	6	830.413	7.17464	0.003214	1000	2.40542	0.025531	40.0902	0.425517
Apo	4006	4012	ERLDEGL	6	830.413	7.15625	0.010579	10000	2.36509	0.0237	39.4181	0.395
BI8622	4007	4016	RLDEGLRKED	9	1229.64	5.35274	0.002517	0	0	0	0	0
BI8622	4007	4016	RLDEGLRKED	9	1229.64	5.31517	0.010164	10	2.95501	0.031744	32.8334	0.352711
BI8622	4007	4016	RLDEGLRKED	9	1229.64	5.32085	0.007748	30	3.25626	0.02304	36.1806	0.256
BI8622	4007	4016	RLDEGLRKED	9	1229.64	5.30562	0.004177	100	3.49395	0.022148	38.8216	0.246089
BI8622	4007	4016	RLDEGLRKED	9	1229.64	5.32876	0.00373	1000	3.56227	0.02905	39.5808	0.322778
BI8622	4007	4016	RLDEGLRKED	9	1229.64	5.32465	0.007866	10000	3.65221	0.041506	40.5801	0.461178
BI8626	4007	4016	RLDEGLRKED	9	1229.64	5.35774	0.008142	0	0	0	0	0
BI8626	4007	4016	RLDEGLRKED	9	1229.64	5.31995	0.009017	10	2.96311	0.022501	32.9234	0.250011
BI8626	4007	4016	RLDEGLRKED	9	1229.64	5.33327	0.003206	30	3.33351	0.022342	37.039	0.248244
BI8626	4007	4016	RLDEGLRKED	9	1229.64	5.31229	0.00645	100	3.50077	0.029074	38.8975	0.323044
BI8626	4007	4016	RLDEGLRKED	9	1229.64	5.337	0.004026	1000	3.62684	0.021376	40.2982	0.237511
BI8626	4007	4016	RLDEGLRKED	9	1229.64	5.30887	0.002562	10000	3.66497	0.028548	40.7219	0.3172
Apo	4007	4016	RLDEGLRKED	9	1229.64	5.35365	0.002521	0	0	0	0	0
Apo	4007	4016	RLDEGLRKED	9	1229.64	5.35588	0.031695	10	2.93497	0.007244	32.6108	0.0804889
Apo	4007	4016	RLDEGLRKED	9	1229.64	5.32188	0.007855	30	3.32314	0.014061	36.9238	0.156233
Apo	4007	4016	RLDEGLRKED	9	1229.64	5.31674	0.011839	100	3.46634	0.021608	38.5149	0.240089
Apo	4007	4016	RLDEGLRKED	9	1229.64	5.33616	0.00829	1000	3.57047	0.022283	39.6719	0.247589
Apo	4007	4016	RLDEGLRKED	9	1229.64	5.29947	0.00297	10000	3.65294	0.010661	40.5883	0.118456
BI8622	4009	4017	DEGLRKEDM	8	1091.49	5.86057	0.006185	0	0	0	0	0
BI8622	4009	4017	DEGLRKEDM	8	1091.49	5.89164	0.005198	10	2.17235	0.028795	27.1543	0.359938
BI8622	4009	4017	DEGLRKEDM	8	1091.49	5.9035	0.009344	30	2.41849	0.013908	30.2311	0.17385
BI8622	4009	4017	DEGLRKEDM	8	1091.49	5.88461	0.00234	100	2.55783	0.019816	31.9728	0.2477
BI8622	4009	4017	DEGLRKEDM	8	1091.49	5.88633	0.005523	1000	2.87382	0.01114	35.9228	0.13925
BI8622	4009	4017	DEGLRKEDM	8	1091.49	5.895	0.00232	10000	3.15943	0.017589	39.4929	0.219863
BI8626	4009	4017	DEGLRKEDM	8	1091.49	5.87235	0.007328	0	0	0	0	0
BI8626	4009	4017	DEGLRKEDM	8	1091.49	5.89239	0.007931	10	2.15373	0.067045	26.9216	0.838062
BI8626	4009	4017	DEGLRKEDM	8	1091.49	5.8997	0.003528	30	2.37837	0.049291	29.7296	0.616138
BI8626	4009	4017	DEGLRKEDM	8	1091.49	5.89317	0.005082	100	2.55323	0.045291	31.9153	0.566137
BI8626	4009	4017	DEGLRKEDM	8	1091.49	5.88184	0.006247	1000	2.82024	0.04033	35.253	0.504125
BI8626	4009	4017	DEGLRKEDM	8	1091.49	5.89756	0.002238	10000	3.17163	0.044357	39.6454	0.554462
Apo	4009	4017	DEGLRKEDM	8	1091.49	5.86644	0.005549	0	0	0	0	0
Apo	4009	4017	DEGLRKEDM	8	1091.49	5.89304	0.00701	10	2.17391	0.06132	27.1739	0.7665
Apo	4009	4017	DEGLRKEDM	8	1091.49	5.89622	0.00481	30	2.36668	0.040778	29.5835	0.509725
Apo	4009	4017	DEGLRKEDM	8	1091.49	5.89285	0.007812	100	2.54351	0.047698	31.7938	0.596225
Apo	4009	4017	DEGLRKEDM	8	1091.49	5.88989	0.001471	1000	2.84246	0.035799	35.5308	0.447487
Apo	4009	4017	DEGLRKEDM	8	1091.49	5.88052	0.010829	10000	3.12526	0.034255	39.0657	0.428187
BI8622	4009	4019	DEGLRKEDMAV	10	1261.6	6.54983	0.00421	0	0	0	0	0
BI8622	4009	4019	DEGLRKEDMAV	10	1261.6	6.56422	0.001959	10	3.29284	0.036281	32.9284	0.36281
BI8622	4009	4019	DEGLRKEDMAV	10	1261.6	6.57211	0.008068	30	3.54206	0.048925	35.4206	0.48925
BI8622	4009	4019	DEGLRKEDMAV	10	1261.6	6.56434	0.005147	100	3.65629	0.049833	36.5629	0.49833
BI8622	4009	4019	DEGLRKEDMAV	10	1261.6	6.55661	0.00686	1000	3.96287	0.062264	39.6287	0.62264
BI8622	4009	4019	DEGLRKEDMAV	10	1261.6	6.56304	0.003059	10000	4.30714	0.021204	43.0714	0.21204
BI8626	4009	4019	DEGLRKEDMAV	10	1261.6	6.56232	0.002354	0	0	0	0	0
BI8626	4009	4019	DEGLRKEDMAV	10	1261.6	6.56525	0.009664	10	3.34031	0.067591	33.4031	0.67591
BI8626	4009	4019	DEGLRKEDMAV	10	1261.6	6.5697	0.006433	30	3.55212	0.066589	35.5212	0.66589
BI8626	4009	4019	DEGLRKEDMAV	10	1261.6	6.56624	0.00603	100	3.69316	0.027406	36.9316	0.27406
BI8626	4009	4019	DEGLRKEDMAV	10	1261.6	6.54908	0.00835	1000	3.96031	0.050117	39.6031	0.50117
BI8626	4009	4019	DEGLRKEDMAV	10	1261.6	6.56636	0.004915	10000	4.39617	0.050584	43.9617	0.50584
Apo	4009	4019	DEGLRKEDMAV	10	1261.6	6.5517	0.004086	0	0	0	0	0
Apo	4009	4019	DEGLRKEDMAV	10	1261.6	6.5649	0.005261	10	3.35553	0.086459	33.5553	0.86459
Apo	4009	4019	DEGLRKEDMAV	10	1261.6	6.57174	0.007053	30	3.57301	0.048002	35.7301	0.48002
Apo	4009	4019	DEGLRKEDMAV	10	1261.6	6.56759	0.00271	100	3.68028	0.042756	36.8028	0.42756
Apo	4009	4019	DEGLRKEDMAV	10	1261.6	6.56248	0.002511	1000	3.92181	0.020239	39.2181	0.20239
Apo	4009	4019	DEGLRKEDMAV	10	1261.6	6.55327	0.008233	10000	4.29522	0.029432	42.9522	0.29432
BI8622	4009	4030	DEGLRKEDMAVHVRRDHVFEDS	21	2639.25	6.33855	0.002378	0	0	0	0	0
BI8622	4009	4030	DEGLRKEDMAVHVRRDHVFEDS	21	2639.25	6.36722	0.002422	10	4.01665	0.085122	19.1269	0.405343
BI8622	4009	4030	DEGLRKEDMAVHVRRDHVFEDS	21	2639.25	6.37036	0.012427	30	4.43501	0.088308	21.1191	0.420514
BI8622	4009	4030	DEGLRKEDMAVHVRRDHVFEDS	21	2639.25	6.35337	0.003411	100	4.91353	0.033508	23.3978	0.159562
BI8622	4009	4030	DEGLRKEDMAVHVRRDHVFEDS	21	2639.25	6.35729	0.00757	1000	5.50145	0.033189	26.1974	0.158043
BI8622	4009	4030	DEGLRKEDMAVHVRRDHVFEDS	21	2639.25	6.36233	0.002733	10000	5.67349	0.064631	27.0166	0.307767
BI8626	4009	4030	DEGLRKEDMAVHVRRDHVFEDS	21	2639.25	6.34203	0.001393	0	0	0	0	0
BI8626	4009	4030	DEGLRKEDMAVHVRRDHVFEDS	21	2639.25	6.36877	0.013214	10	4.05355	0.113674	19.3026	0.541305
BI8626	4009	4030	DEGLRKEDMAVHVRRDHVFEDS	21	2639.25	6.37512	0.016128	30	4.45018	0.09452	21.1913	0.450095
BI8626	4009	4030	DEGLRKEDMAVHVRRDHVFEDS	21	2639.25	6.36565	0.005282	100	4.94792	0.091233	23.5615	0.434443
BI8626	4009	4030	DEGLRKEDMAVHVRRDHVFEDS	21	2639.25	6.35213	0.004046	1000	5.45925	0.033357	25.9964	0.158843
BI8626	4009	4030	DEGLRKEDMAVHVRRDHVFEDS	21	2639.25	6.36895	0.002236	10000	5.7626	0.050857	27.4409	0.242176
Apo	4009	4030	DEGLRKEDMAVHVRRDHVFEDS	21	2639.25	6.33779	0.002021	0	0	0	0	0
Apo	4009	4030	DEGLRKEDMAVHVRRDHVFEDS	21	2639.25	6.36859	0.012353	10	4.04683	0.088121	19.2706	0.419624
Apo	4009	4030	DEGLRKEDMAVHVRRDHVFEDS	21	2639.25	6.37326	0.004699	30	4.37383	0.067735	20.8277	0.322548
Apo	4009	4030	DEGLRKEDMAVHVRRDHVFEDS	21	2639.25	6.3654	0.011799	100	4.89194	0.047785	23.295	0.227548
Apo	4009	4030	DEGLRKEDMAVHVRRDHVFEDS	21	2639.25	6.36127	0.002491	1000	5.44044	0.040797	25.9069	0.194271
Apo	4009	4030	DEGLRKEDMAVHVRRDHVFEDS	21	2639.25	6.34914	0.008619	10000	5.64631	0.036714	26.8872	0.174829
BI8622	4010	4015	EGLRKE	5	730.397	4.31182	0.005003	0	0	0	0	0
BI8622	4010	4015	EGLRKE	5	730.397	4.28381	0.002488	10	1.83177	0.017791	36.6353	0.35582
BI8622	4010	4015	EGLRKE	5	730.397	4.29057	0.004533	30	2.00274	0.011394	40.0548	0.22788
BI8622	4010	4015	EGLRKE	5	730.397	4.27353	0.01766	100	2.22538	0.009707	44.5076	0.19414
BI8622	4010	4015	EGLRKE	5	730.397	4.28453	0.007192	1000	2.3694	0.010762	47.388	0.21524
BI8622	4010	4015	EGLRKE	5	730.397	4.28612	0.002809	10000	2.42995	0.018417	48.5989	0.36834
BI8626	4010	4015	EGLRKE	5	730.397	4.31872	0.011435	0	0	0	0	0
BI8626	4010	4015	EGLRKE	5	730.397	4.29058	0.003612	10	1.84239	0.009861	36.8479	0.19722
BI8626	4010	4015	EGLRKE	5	730.397	4.29603	0.001	30	2.02827	0.009462	40.5655	0.18924
BI8626	4010	4015	EGLRKE	5	730.397	4.28829	0.006204	100	2.25678	0.007809	45.1355	0.15618
BI8626	4010	4015	EGLRKE	5	730.397	4.29582	0.007734	1000	2.42025	0.012688	48.405	0.25376
BI8626	4010	4015	EGLRKE	5	730.397	4.27106	0.003755	10000	2.44188	0.010466	48.8375	0.20932
Apo	4010	4015	EGLRKE	5	730.397	4.3144	0.001821	0	0	0	0	0
Apo	4010	4015	EGLRKE	5	730.397	4.31988	0.027614	10	1.79965	0.009181	35.9931	0.18362
Apo	4010	4015	EGLRKE	5	730.397	4.2841	0.011265	30	2.03871	0.013976	40.7742	0.27952
Apo	4010	4015	EGLRKE	5	730.397	4.28891	0.008392	100	2.21769	0.003462	44.3537	0.06924
Apo	4010	4015	EGLRKE	5	730.397	4.29173	0.008406	1000	2.3986	0.017639	47.9721	0.35278
Apo	4010	4015	EGLRKE	5	730.397	4.26421	0.006924	10000	2.41845	0.008552	48.3691	0.17104
BI8622	4010	4016	EGLRKED	6	845.424	4.40758	0.005125	0	0	0	0	0
BI8622	4010	4016	EGLRKED	6	845.424	4.37689	0.003001	10	1.91214	0.024981	31.869	0.41635
BI8622	4010	4016	EGLRKED	6	845.424	4.38	0.004136	30	2.13211	0.011138	35.5351	0.185633
BI8622	4010	4016	EGLRKED	6	845.424	4.36652	0.011882	100	2.31956	0.01231	38.6594	0.205167
BI8622	4010	4016	EGLRKED	6	845.424	4.37688	0.008197	1000	2.41474	0.035656	40.2457	0.594267
BI8622	4010	4016	EGLRKED	6	845.424	4.38302	0.007573	10000	2.50042	0.018231	41.6737	0.30385
BI8626	4010	4016	EGLRKED	6	845.424	4.41226	0.008489	0	0	0	0	0
BI8626	4010	4016	EGLRKED	6	845.424	4.38484	0.003847	10	1.95702	0.017069	32.6171	0.284483
BI8626	4010	4016	EGLRKED	6	845.424	4.38553	0.000437	30	2.20133	0.01762	36.6888	0.293667
BI8626	4010	4016	EGLRKED	6	845.424	4.37846	0.004453	100	2.37842	0.018168	39.6404	0.3028
BI8626	4010	4016	EGLRKED	6	845.424	4.38792	0.005158	1000	2.52543	0.03322	42.0904	0.553667
BI8626	4010	4016	EGLRKED	6	845.424	4.36939	0.009216	10000	2.54509	0.01787	42.4182	0.297833
Apo	4010	4016	EGLRKED	6	845.424	4.4083	0.002467	0	0	0	0	0
Apo	4010	4016	EGLRKED	6	845.424	4.41552	0.029589	10	1.86476	0.019533	31.0794	0.32555
Apo	4010	4016	EGLRKED	6	845.424	4.37735	0.009892	30	2.11798	0.025206	35.2996	0.4201
Apo	4010	4016	EGLRKED	6	845.424	4.3799	0.007268	100	2.29315	0.017133	38.2191	0.28555
Apo	4010	4016	EGLRKED	6	845.424	4.38208	0.006061	1000	2.43375	0.020856	40.5625	0.3476
Apo	4010	4016	EGLRKED	6	845.424	4.35961	0.003745	10000	2.47352	0.01484	41.2253	0.247333
BI8622	4011	4017	GLRKEDM	6	847.422	6.1156	0.266526	0	0	0	0	0
BI8622	4011	4017	GLRKEDM	6	847.422	5.91549	0.005888	10	2.068	0.035944	34.4667	0.599067
BI8622	4011	4017	GLRKEDM	6	847.422	5.92594	0.007264	30	2.25982	0.034649	37.6636	0.577483
BI8622	4011	4017	GLRKEDM	6	847.422	5.90874	0.001765	100	2.38506	0.035523	39.7511	0.59205
BI8622	4011	4017	GLRKEDM	6	847.422	5.90906	0.006125	1000	2.64854	0.032863	44.1424	0.547717
BI8622	4011	4017	GLRKEDM	6	847.422	5.91588	0.001268	10000	2.89552	0.042376	48.2587	0.706267
BI8626	4011	4017	GLRKEDM	6	847.422	5.80539	0.168243	0	0	0	0	0
BI8626	4011	4017	GLRKEDM	6	847.422	5.91433	0.006928	10	2.10245	0.051697	35.0409	0.861617
BI8626	4011	4017	GLRKEDM	6	847.422	5.92282	0.004326	30	2.2935	0.032689	38.2249	0.544817
BI8626	4011	4017	GLRKEDM	6	847.422	5.91565	0.006129	100	2.39737	0.052235	39.9561	0.870583
BI8626	4011	4017	GLRKEDM	6	847.422	5.90183	0.004771	1000	2.63352	0.050407	43.892	0.840117
BI8626	4011	4017	GLRKEDM	6	847.422	5.91906	0.004006	10000	2.92634	0.057	48.7724	0.95
Apo	4011	4017	GLRKEDM	6	847.422	6.11237	0.261366	0	0	0	0	0
Apo	4011	4017	GLRKEDM	6	847.422	5.9133	0.005577	10	2.10954	0.043468	35.159	0.724467
Apo	4011	4017	GLRKEDM	6	847.422	5.91824	0.00489	30	2.2523	0.04402	37.5384	0.733667
Apo	4011	4017	GLRKEDM	6	847.422	5.9143	0.005678	100	2.38473	0.041661	39.7455	0.69435
Apo	4011	4017	GLRKEDM	6	847.422	5.91294	0.000668	1000	2.61752	0.036095	43.6253	0.601583
Apo	4011	4017	GLRKEDM	6	847.422	5.90357	0.00951	10000	2.86921	0.041515	47.8201	0.691917
BI8622	4012	4016	LRKED	4	659.36	3.42281	0.00485	0	0	0	0	0
BI8622	4012	4016	LRKED	4	659.36	3.42875	0.002347	10	0.87879	0.008274	21.9697	0.20685
BI8622	4012	4016	LRKED	4	659.36	3.43133	0.003225	30	0.986434	0.010038	24.6608	0.25095
BI8622	4012	4016	LRKED	4	659.36	3.42196	0.007578	100	1.16497	0.007272	29.1243	0.1818
BI8622	4012	4016	LRKED	4	659.36	3.42605	0.009583	1000	1.29305	0.015217	32.3263	0.380425
BI8622	4012	4016	LRKED	4	659.36	3.42452	0.002166	10000	1.34369	0.016093	33.5922	0.402325
BI8626	4012	4016	LRKED	4	659.36	3.42519	0.005211	0	0	0	0	0
BI8626	4012	4016	LRKED	4	659.36	3.43149	0.002618	10	0.927558	0.010265	23.1889	0.256625
BI8626	4012	4016	LRKED	4	659.36	3.43286	0.004014	30	1.04336	0.005988	26.084	0.1497
BI8626	4012	4016	LRKED	4	659.36	3.43143	0.005002	100	1.20856	0.011104	30.2141	0.2776
BI8626	4012	4016	LRKED	4	659.36	3.43053	0.003314	1000	1.35895	0.018037	33.9738	0.450925
BI8626	4012	4016	LRKED	4	659.36	3.41483	0.002441	10000	1.37918	0.012189	34.4796	0.304725
Apo	4012	4016	LRKED	4	659.36	3.42614	0.002449	0	0	0	0	0
Apo	4012	4016	LRKED	4	659.36	3.4429	0.012885	10	0.860118	0.007882	21.503	0.19705
Apo	4012	4016	LRKED	4	659.36	3.42647	0.007218	30	0.99278	0.007761	24.8195	0.194025
Apo	4012	4016	LRKED	4	659.36	3.42873	0.003333	100	1.1582	0.012625	28.955	0.315625
Apo	4012	4016	LRKED	4	659.36	3.42792	0.003939	1000	1.31847	0.019341	32.9616	0.483525
Apo	4012	4016	LRKED	4	659.36	3.4171	0.004162	10000	1.34288	0.012565	33.572	0.314125
BI8622	4013	4030	RKEDMAVHVRRDHVFEDS	17	2225.08	5.86401	0.002251	0	0	0	0	0
BI8622	4013	4030	RKEDMAVHVRRDHVFEDS	17	2225.08	5.89389	0.002085	10	1.78759	0.030593	10.5152	0.179959
BI8622	4013	4030	RKEDMAVHVRRDHVFEDS	17	2225.08	5.90058	0.009765	30	2.10406	0.025992	12.3769	0.152894
BI8622	4013	4030	RKEDMAVHVRRDHVFEDS	17	2225.08	5.88489	0.005717	100	2.47527	0.021917	14.5604	0.128924
BI8622	4013	4030	RKEDMAVHVRRDHVFEDS	17	2225.08	5.8818	0.006781	1000	2.88404	0.027868	16.9649	0.163929
BI8622	4013	4030	RKEDMAVHVRRDHVFEDS	17	2225.08	5.88987	0.001888	10000	3.01641	0.026966	17.7436	0.158624
BI8626	4013	4030	RKEDMAVHVRRDHVFEDS	17	2225.08	5.86797	0.000492	0	0	0	0	0
BI8626	4013	4030	RKEDMAVHVRRDHVFEDS	17	2225.08	5.89533	0.015218	10	1.75869	0.049729	10.3452	0.292524
BI8626	4013	4030	RKEDMAVHVRRDHVFEDS	17	2225.08	5.90081	0.014921	30	2.06283	0.028107	12.1343	0.165335
BI8626	4013	4030	RKEDMAVHVRRDHVFEDS	17	2225.08	5.89382	0.007131	100	2.43978	0.02049	14.3516	0.120529
BI8626	4013	4030	RKEDMAVHVRRDHVFEDS	17	2225.08	5.87874	0.004338	1000	2.84359	0.024739	16.727	0.145524
BI8626	4013	4030	RKEDMAVHVRRDHVFEDS	17	2225.08	5.89383	0.002352	10000	3.04447	0.028137	17.9086	0.165512
Apo	4013	4030	RKEDMAVHVRRDHVFEDS	17	2225.08	5.86422	0.001586	0	0	0	0	0
Apo	4013	4030	RKEDMAVHVRRDHVFEDS	17	2225.08	5.89314	0.011193	10	1.74964	0.021946	10.292	0.129094
Apo	4013	4030	RKEDMAVHVRRDHVFEDS	17	2225.08	5.89678	0.004431	30	1.9894	0.023343	11.7024	0.137312
Apo	4013	4030	RKEDMAVHVRRDHVFEDS	17	2225.08	5.89277	0.007288	100	2.42274	0.021841	14.2514	0.128476
Apo	4013	4030	RKEDMAVHVRRDHVFEDS	17	2225.08	5.8877	0.002059	1000	2.82587	0.043405	16.6228	0.255324
Apo	4013	4030	RKEDMAVHVRRDHVFEDS	17	2225.08	5.87686	0.00899	10000	2.99419	0.024517	17.6129	0.144218
BI8622	4017	4022	MAVHVR	5	711.385	5.23927	0.002154	0	0	0	0	0
BI8622	4017	4022	MAVHVR	5	711.385	5.21627	0.004942	10	0.108561	0.026445	2.17122	0.5289
BI8622	4017	4022	MAVHVR	5	711.385	5.21724	0.004624	30	0.130529	0.016326	2.61058	0.32652
BI8622	4017	4022	MAVHVR	5	711.385	5.2073	0.004799	100	0.14274	0.014575	2.8548	0.2915
BI8622	4017	4022	MAVHVR	5	711.385	5.22119	0.0046	1000	0.227932	0.029702	4.55864	0.59404
BI8622	4017	4022	MAVHVR	5	711.385	5.21688	0.002699	10000	0.266914	0.016003	5.33828	0.32006
BI8626	4017	4022	MAVHVR	5	711.385	5.24527	0.009085	0	0	0	0	0
BI8626	4017	4022	MAVHVR	5	711.385	5.22101	0.0048	10	0.142459	0.014868	2.84918	0.29736
BI8626	4017	4022	MAVHVR	5	711.385	5.22446	0.001974	30	0.12825	0.026038	2.565	0.52076
BI8626	4017	4022	MAVHVR	5	711.385	5.21336	0.007997	100	0.190605	0.020573	3.8121	0.41146
BI8626	4017	4022	MAVHVR	5	711.385	5.2259	0.001925	1000	0.263033	0.015459	5.26066	0.30918
BI8626	4017	4022	MAVHVR	5	711.385	5.2049	0.003383	10000	0.284226	0.021694	5.68452	0.43388
Apo	4017	4022	MAVHVR	5	711.385	5.24057	0.001781	0	0	0	0	0
Apo	4017	4022	MAVHVR	5	711.385	5.24353	0.021672	10	0.118413	0.020105	2.36826	0.4021
Apo	4017	4022	MAVHVR	5	711.385	5.21958	0.00674	30	0.086337	0.013528	1.72674	0.27056
Apo	4017	4022	MAVHVR	5	711.385	5.21801	0.008235	100	0.143371	0.017522	2.86742	0.35044
Apo	4017	4022	MAVHVR	5	711.385	5.2236	0.005101	1000	0.225593	0.014192	4.51186	0.28384
Apo	4017	4022	MAVHVR	5	711.385	5.20159	0.00133	10000	0.267679	0.026669	5.35358	0.53338
BI8622	4017	4028	MAVHVRRDHVFE	11	1494.75	6.08906	0.05107	0	0	0	0	0
BI8622	4017	4028	MAVHVRRDHVFE	11	1494.75	6.06863	0.010614	10	1.28391	0.049231	11.6719	0.447555
BI8622	4017	4028	MAVHVRRDHVFE	11	1494.75	6.06305	0.003757	30	1.52405	0.053085	13.855	0.482591
BI8622	4017	4028	MAVHVRRDHVFE	11	1494.75	6.05732	0.003626	100	1.8882	0.050736	17.1654	0.461236
BI8622	4017	4028	MAVHVRRDHVFE	11	1494.75	6.08345	0.010569	1000	2.04228	0.047225	18.5662	0.429318
BI8622	4017	4028	MAVHVRRDHVFE	11	1494.75	6.06562	0.003023	10000	2.1445	0.048029	19.4955	0.436627
BI8626	4017	4028	MAVHVRRDHVFE	11	1494.75	6.08589	0.010608	0	0	0	0	0
BI8626	4017	4028	MAVHVRRDHVFE	11	1494.75	6.06708	0.003086	10	1.32353	0.020209	12.0321	0.183718
BI8626	4017	4028	MAVHVRRDHVFE	11	1494.75	6.07938	0.005269	30	1.62569	0.018796	14.779	0.170873
BI8626	4017	4028	MAVHVRRDHVFE	11	1494.75	6.05864	0.004747	100	1.90981	0.020614	17.3619	0.1874
BI8626	4017	4028	MAVHVRRDHVFE	11	1494.75	6.08394	0.0146	1000	2.13582	0.014138	19.4166	0.128527
BI8626	4017	4028	MAVHVRRDHVFE	11	1494.75	6.05625	0.002953	10000	2.15028	0.021166	19.548	0.192418
Apo	4017	4028	MAVHVRRDHVFE	11	1494.75	6.09242	0.054692	0	0	0	0	0
Apo	4017	4028	MAVHVRRDHVFE	11	1494.75	6.08026	0.013955	10	1.31285	0.053669	11.935	0.4879
Apo	4017	4028	MAVHVRRDHVFE	11	1494.75	6.07098	0.001057	30	1.56662	0.05148	14.242	0.468
Apo	4017	4028	MAVHVRRDHVFE	11	1494.75	6.06182	0.007173	100	1.91075	0.053052	17.3705	0.482291
Apo	4017	4028	MAVHVRRDHVFE	11	1494.75	6.07091	0.003549	1000	2.07059	0.055701	18.8235	0.506373
Apo	4017	4028	MAVHVRRDHVFE	11	1494.75	6.05051	0.005263	10000	2.14013	0.056604	19.4558	0.514582
BI8622	4017	4029	MAVHVRRDHVFED	12	1609.78	6.20404	0.004566	0	0	0	0	0
BI8622	4017	4029	MAVHVRRDHVFED	12	1609.78	6.18258	0.009493	10	1.02699	0.016025	8.55821	0.133542
BI8622	4017	4029	MAVHVRRDHVFED	12	1609.78	6.17881	0.005392	30	1.25023	0.018085	10.4186	0.150708
BI8622	4017	4029	MAVHVRRDHVFED	12	1609.78	6.16885	0.004226	100	1.62403	0.017074	13.5335	0.142283
BI8622	4017	4029	MAVHVRRDHVFED	12	1609.78	6.19802	0.00709	1000	1.77714	0.021821	14.8095	0.181842
BI8622	4017	4029	MAVHVRRDHVFED	12	1609.78	6.17854	0.003446	10000	1.87042	0.01429	15.5869	0.119083
BI8626	4017	4029	MAVHVRRDHVFED	12	1609.78	6.20791	0.011071	0	0	0	0	0
BI8626	4017	4029	MAVHVRRDHVFED	12	1609.78	6.18291	0.004109	10	1.07116	0.013704	8.92631	0.1142
BI8626	4017	4029	MAVHVRRDHVFED	12	1609.78	6.19381	0.004662	30	1.34993	0.022509	11.2494	0.187575
BI8626	4017	4029	MAVHVRRDHVFED	12	1609.78	6.16971	0.005903	100	1.64596	0.019327	13.7163	0.161058
BI8626	4017	4029	MAVHVRRDHVFED	12	1609.78	6.19956	0.013431	1000	1.83356	0.024155	15.2797	0.201292
BI8626	4017	4029	MAVHVRRDHVFED	12	1609.78	6.16964	0.002523	10000	1.8658	0.009537	15.5483	0.079475
Apo	4017	4029	MAVHVRRDHVFED	12	1609.78	6.20365	0.002276	0	0	0	0	0
Apo	4017	4029	MAVHVRRDHVFED	12	1609.78	6.20265	0.018845	10	1.07484	0.022493	8.95703	0.187442
Apo	4017	4029	MAVHVRRDHVFED	12	1609.78	6.18498	0.002968	30	1.30561	0.012516	10.8801	0.1043
Apo	4017	4029	MAVHVRRDHVFED	12	1609.78	6.17658	0.009412	100	1.63806	0.019558	13.6505	0.162983
Apo	4017	4029	MAVHVRRDHVFED	12	1609.78	6.18483	0.004429	1000	1.80335	0.009165	15.0279	0.076375
Apo	4017	4029	MAVHVRRDHVFED	12	1609.78	6.16119	0.005963	10000	1.85812	0.033796	15.4843	0.281633
BI8622	4017	4031	MAVHVRRDHVFEDSY	14	1859.87	6.65022	0.003934	0	0	0	0	0
BI8622	4017	4031	MAVHVRRDHVFEDSY	14	1859.87	6.63342	0.020303	10	1.23364	0.04487	8.81169	0.3205
BI8622	4017	4031	MAVHVRRDHVFEDSY	14	1859.87	6.62555	0.004401	30	1.52086	0.030212	10.8633	0.2158
BI8622	4017	4031	MAVHVRRDHVFEDSY	14	1859.87	6.61914	0.008389	100	1.88857	0.012471	13.4898	0.0890786
BI8622	4017	4031	MAVHVRRDHVFEDSY	14	1859.87	6.66138	0.019934	1000	1.98568	0.063078	14.1834	0.450557
BI8622	4017	4031	MAVHVRRDHVFEDSY	14	1859.87	6.6287	0.000779	10000	2.10185	0.010308	15.0132	0.0736286
BI8626	4017	4031	MAVHVRRDHVFEDSY	14	1859.87	6.65029	0.010128	0	0	0	0	0
BI8626	4017	4031	MAVHVRRDHVFEDSY	14	1859.87	6.62342	0.004085	10	1.40057	0.025228	10.0041	0.1802
BI8626	4017	4031	MAVHVRRDHVFEDSY	14	1859.87	6.64856	0.012009	30	1.65484	0.028542	11.8203	0.203871
BI8626	4017	4031	MAVHVRRDHVFEDSY	14	1859.87	6.61427	0.004673	100	1.91511	0.029659	13.6794	0.21185
BI8626	4017	4031	MAVHVRRDHVFEDSY	14	1859.87	6.65199	0.028126	1000	2.05482	0.136054	14.6773	0.971814
BI8626	4017	4031	MAVHVRRDHVFEDSY	14	1859.87	6.61852	0.002445	10000	2.20116	0.011801	15.7225	0.0842929
Apo	4017	4031	MAVHVRRDHVFEDSY	14	1859.87	6.65249	0.002242	0	0	0	0	0
Apo	4017	4031	MAVHVRRDHVFEDSY	14	1859.87	6.6509	0.021757	10	1.26312	0.031523	9.02226	0.225164
Apo	4017	4031	MAVHVRRDHVFEDSY	14	1859.87	6.63521	0.004701	30	1.55901	0.046853	11.1358	0.334664
Apo	4017	4031	MAVHVRRDHVFEDSY	14	1859.87	6.62409	0.007248	100	1.90555	0.016534	13.611	0.1181
Apo	4017	4031	MAVHVRRDHVFEDSY	14	1859.87	6.64154	0.007359	1000	2.04564	0.038112	14.6117	0.272229
Apo	4017	4031	MAVHVRRDHVFEDSY	14	1859.87	6.61398	0.003965	10000	2.07865	0.031449	14.8475	0.224636
BI8622	4018	4027	AVHVRRDHVF	9	1234.67	6.07658	0.126322	0	0	0	0	0
BI8622	4018	4027	AVHVRRDHVF	9	1234.67	5.70704	0.014568	10	1.02841	0.074673	11.4267	0.8297
BI8622	4018	4027	AVHVRRDHVF	9	1234.67	6.07126	0.113911	30	1.22017	0.062613	13.5574	0.6957
BI8622	4018	4027	AVHVRRDHVF	9	1234.67	5.99053	0.172929	100	1.35138	0.066307	15.0154	0.736744
BI8622	4018	4027	AVHVRRDHVF	9	1234.67	6.0281	0.19072	1000	1.40416	0.066977	15.6018	0.744189
BI8622	4018	4027	AVHVRRDHVF	9	1234.67	6.00896	0.174845	10000	1.49517	0.061367	16.613	0.681856
BI8626	4018	4027	AVHVRRDHVF	9	1234.67	6.09154	0.120085	0	0	0	0	0
BI8626	4018	4027	AVHVRRDHVF	9	1234.67	6.10773	0.002501	10	1.10265	0.056382	12.2516	0.626467
BI8626	4018	4027	AVHVRRDHVF	9	1234.67	6.02274	0.160972	30	1.25641	0.058518	13.9601	0.6502
BI8626	4018	4027	AVHVRRDHVF	9	1234.67	5.99155	0.173205	100	1.39051	0.061033	15.4501	0.678144
BI8626	4018	4027	AVHVRRDHVF	9	1234.67	5.73399	0.014842	1000	1.50016	0.056918	16.6684	0.632422
BI8626	4018	4027	AVHVRRDHVF	9	1234.67	6.07132	0.102576	10000	1.45867	0.06035	16.2074	0.670556
Apo	4018	4027	AVHVRRDHVF	9	1234.67	6.12483	0.001396	0	0	0	0	0
Apo	4018	4027	AVHVRRDHVF	9	1234.67	6.12146	0.01818	10	1.02011	0.055215	11.3345	0.6135
Apo	4018	4027	AVHVRRDHVF	9	1234.67	6.11346	0.003692	30	1.22131	0.01058	13.5701	0.117556
Apo	4018	4027	AVHVRRDHVF	9	1234.67	6.10217	0.006165	100	1.33894	0.0194	14.8771	0.215556
Apo	4018	4027	AVHVRRDHVF	9	1234.67	6.11076	0.004023	1000	1.42378	0.037123	15.8198	0.412478
Apo	4018	4027	AVHVRRDHVF	9	1234.67	6.09413	0.00533	10000	1.43249	0.012736	15.9165	0.141511
BI8622	4018	4031	AVHVRRDHVFEDSY	13	1728.83	6.29878	0.002784	0	0	0	0	0
BI8622	4018	4031	AVHVRRDHVFEDSY	13	1728.83	6.32532	0.002411	10	1.15649	0.063003	8.89607	0.484638
BI8622	4018	4031	AVHVRRDHVFEDSY	13	1728.83	6.33803	0.018196	30	1.35488	0.061535	10.4222	0.473346
BI8622	4018	4031	AVHVRRDHVFEDSY	13	1728.83	6.35025	0.007987	100	1.70679	0.025513	13.1291	0.196254
BI8622	4018	4031	AVHVRRDHVFEDSY	13	1728.83	6.31537	0.008826	1000	1.93413	0.023596	14.8779	0.181508
BI8622	4018	4031	AVHVRRDHVFEDSY	13	1728.83	6.33336	0.001609	10000	1.91831	0.027085	14.7562	0.208346
BI8626	4018	4031	AVHVRRDHVFEDSY	13	1728.83	6.30659	0.001982	0	0	0	0	0
BI8626	4018	4031	AVHVRRDHVFEDSY	13	1728.83	6.33748	0.032571	10	1.15528	0.027185	8.8868	0.209115
BI8626	4018	4031	AVHVRRDHVFEDSY	13	1728.83	6.34595	0.016613	30	1.32053	0.051399	10.1579	0.395377
BI8626	4018	4031	AVHVRRDHVFEDSY	13	1728.83	6.33778	0.018398	100	1.72015	0.042389	13.2319	0.326069
BI8626	4018	4031	AVHVRRDHVFEDSY	13	1728.83	6.31212	0.005491	1000	1.92389	0.014066	14.7991	0.1082
BI8626	4018	4031	AVHVRRDHVFEDSY	13	1728.83	6.33174	0.003231	10000	1.91746	0.037205	14.7497	0.286192
Apo	4018	4031	AVHVRRDHVFEDSY	13	1728.83	6.30131	0.004324	0	0	0	0	0
Apo	4018	4031	AVHVRRDHVFEDSY	13	1728.83	6.34991	0.027095	10	1.11131	0.042471	8.54855	0.3267
Apo	4018	4031	AVHVRRDHVFEDSY	13	1728.83	6.343	0.017846	30	1.31651	0.018644	10.127	0.143415
Apo	4018	4031	AVHVRRDHVFEDSY	13	1728.83	6.35104	0.019827	100	1.68113	0.030683	12.9318	0.236023
Apo	4018	4031	AVHVRRDHVFEDSY	13	1728.83	6.32242	0.003733	1000	1.88154	0.0411	14.4734	0.316154
Apo	4018	4031	AVHVRRDHVFEDSY	13	1728.83	6.31967	0.007997	10000	1.88447	0.024016	14.4959	0.184738
BI8622	4018	4046	AVHVRRDHVFEDSYRELHRKSPEEMKNRL	27	3632.85	6.38234	0.011235	0	0	0	0	0
BI8622	4018	4046	AVHVRRDHVFEDSYRELHRKSPEEMKNRL	27	3632.85	6.39812	0.009207	10	2.1426	0.050238	7.93555	0.186067
BI8622	4018	4046	AVHVRRDHVFEDSYRELHRKSPEEMKNRL	27	3632.85	6.40486	0.016141	30	2.4698	0.038726	9.14741	0.14343
BI8622	4018	4046	AVHVRRDHVFEDSYRELHRKSPEEMKNRL	27	3632.85	6.41345	0.014015	100	2.83845	0.033229	10.5128	0.12307
BI8622	4018	4046	AVHVRRDHVFEDSYRELHRKSPEEMKNRL	27	3632.85	6.39587	0.012363	1000	3.90135	0.039331	14.4494	0.14567
BI8622	4018	4046	AVHVRRDHVFEDSYRELHRKSPEEMKNRL	27	3632.85	6.40063	0.006478	10000	5.58762	0.073992	20.6949	0.274044
BI8626	4018	4046	AVHVRRDHVFEDSYRELHRKSPEEMKNRL	27	3632.85	6.39331	0.008116	0	0	0	0	0
BI8626	4018	4046	AVHVRRDHVFEDSYRELHRKSPEEMKNRL	27	3632.85	6.40056	0.029589	10	2.13675	0.027147	7.9139	0.100544
BI8626	4018	4046	AVHVRRDHVFEDSYRELHRKSPEEMKNRL	27	3632.85	6.40684	0.025768	30	2.45843	0.021648	9.1053	0.0801778
BI8626	4018	4046	AVHVRRDHVFEDSYRELHRKSPEEMKNRL	27	3632.85	6.40921	0.014053	100	2.85692	0.02773	10.5812	0.102704
BI8626	4018	4046	AVHVRRDHVFEDSYRELHRKSPEEMKNRL	27	3632.85	6.39456	0.004131	1000	3.87359	0.023962	14.3466	0.0887481
BI8626	4018	4046	AVHVRRDHVFEDSYRELHRKSPEEMKNRL	27	3632.85	6.40831	0.0025	10000	5.64687	0.044128	20.9143	0.163437
Apo	4018	4046	AVHVRRDHVFEDSYRELHRKSPEEMKNRL	27	3632.85	6.3861	0.011355	0	0	0	0	0
Apo	4018	4046	AVHVRRDHVFEDSYRELHRKSPEEMKNRL	27	3632.85	6.39756	0.014413	10	2.12103	0.044513	7.85567	0.164863
Apo	4018	4046	AVHVRRDHVFEDSYRELHRKSPEEMKNRL	27	3632.85	6.40668	0.012535	30	2.45937	0.050744	9.10876	0.187941
Apo	4018	4046	AVHVRRDHVFEDSYRELHRKSPEEMKNRL	27	3632.85	6.40953	0.003757	100	2.87067	0.057579	10.6321	0.213256
Apo	4018	4046	AVHVRRDHVFEDSYRELHRKSPEEMKNRL	27	3632.85	6.40202	0.008447	1000	3.8192	0.016791	14.1452	0.0621889
Apo	4018	4046	AVHVRRDHVFEDSYRELHRKSPEEMKNRL	27	3632.85	6.38965	0.007625	10000	5.49068	0.034484	20.3358	0.127719
BI8622	4019	4027	VHVRRDHVF	8	1163.63	5.62946	0.004763	0	0	0	0	0
BI8622	4019	4027	VHVRRDHVF	8	1163.63	5.62028	0.012023	10	1.20148	0.0309	15.0185	0.38625
BI8622	4019	4027	VHVRRDHVF	8	1163.63	5.61968	0.006107	30	1.41539	0.070634	17.6924	0.882925
BI8622	4019	4027	VHVRRDHVF	8	1163.63	5.60541	0.015064	100	1.61746	0.05822	20.2182	0.72775
BI8622	4019	4027	VHVRRDHVF	8	1163.63	5.63563	0.01728	1000	1.68734	0.048959	21.0918	0.611988
BI8622	4019	4027	VHVRRDHVF	8	1163.63	5.6198	0.000247	10000	1.72737	0.039476	21.5921	0.49345
BI8626	4019	4027	VHVRRDHVF	8	1163.63	5.64723	0.014528	0	0	0	0	0
BI8626	4019	4027	VHVRRDHVF	8	1163.63	5.62247	0.001015	10	1.25394	0.027982	15.6743	0.349775
BI8626	4019	4027	VHVRRDHVF	8	1163.63	5.65671	0.008462	30	1.50817	0.019997	18.8522	0.249963
BI8626	4019	4027	VHVRRDHVF	8	1163.63	5.61466	0.007638	100	1.62748	0.047522	20.3435	0.594025
BI8626	4019	4027	VHVRRDHVF	8	1163.63	5.64548	0.015632	1000	1.74557	0.022057	21.8196	0.275713
BI8626	4019	4027	VHVRRDHVF	8	1163.63	5.60816	0.001571	10000	1.75225	0.075978	21.9031	0.949725
Apo	4019	4027	VHVRRDHVF	8	1163.63	5.64231	0.000867	0	0	0	0	0
Apo	4019	4027	VHVRRDHVF	8	1163.63	5.64625	0.023654	10	1.21665	0.011108	15.2081	0.13885
Apo	4019	4027	VHVRRDHVF	8	1163.63	5.63197	0.005408	30	1.45124	0.039397	18.1406	0.492463
Apo	4019	4027	VHVRRDHVF	8	1163.63	5.61885	0.007864	100	1.65492	0.059508	20.6865	0.74385
Apo	4019	4027	VHVRRDHVF	8	1163.63	5.62951	0.006518	1000	1.69299	0.059081	21.1624	0.738513
Apo	4019	4027	VHVRRDHVF	8	1163.63	5.6006	0.003121	10000	1.79171	0.040741	22.3964	0.509262
BI8622	4020	4030	HVRRDHVFEDS	10	1395.66	5.369	0.000498	0	0	0	0	0
BI8622	4020	4030	HVRRDHVFEDS	10	1395.66	5.41037	0.005791	10	1.00227	0.020695	10.0227	0.20695
BI8622	4020	4030	HVRRDHVFEDS	10	1395.66	5.41865	0.012289	30	1.21489	0.026453	12.1489	0.26453
BI8622	4020	4030	HVRRDHVFEDS	10	1395.66	5.41954	0.014407	100	1.38441	0.01911	13.8441	0.1911
BI8622	4020	4030	HVRRDHVFEDS	10	1395.66	5.41082	0.007118	1000	1.58475	0.01945	15.8475	0.1945
BI8622	4020	4030	HVRRDHVFEDS	10	1395.66	5.43715	0.01062	10000	1.56339	0.01322	15.6339	0.1322
BI8626	4020	4030	HVRRDHVFEDS	10	1395.66	5.37763	0.007199	0	0	0	0	0
BI8626	4020	4030	HVRRDHVFEDS	10	1395.66	5.40999	0.014773	10	0.971188	0.017326	9.71188	0.17326
BI8626	4020	4030	HVRRDHVFEDS	10	1395.66	5.42401	0.015872	30	1.14075	0.012329	11.4075	0.12329
BI8626	4020	4030	HVRRDHVFEDS	10	1395.66	5.41733	0.011619	100	1.3953	0.03604	13.953	0.3604
BI8626	4020	4030	HVRRDHVFEDS	10	1395.66	5.4034	0.008589	1000	1.60684	0.082294	16.0684	0.82294
BI8626	4020	4030	HVRRDHVFEDS	10	1395.66	5.4337	0.017428	10000	1.62475	0.098622	16.2475	0.98622
Apo	4020	4030	HVRRDHVFEDS	10	1395.66	5.37303	0.002218	0	0	0	0	0
Apo	4020	4030	HVRRDHVFEDS	10	1395.66	5.41357	0.015192	10	0.959007	0.025579	9.59007	0.25579
Apo	4020	4030	HVRRDHVFEDS	10	1395.66	5.41455	0.008502	30	1.12241	0.021214	11.2241	0.21214
Apo	4020	4030	HVRRDHVFEDS	10	1395.66	5.41498	0.012043	100	1.41296	0.037501	14.1296	0.37501
Apo	4020	4030	HVRRDHVFEDS	10	1395.66	5.41114	0.000813	1000	1.52831	0.025815	15.2831	0.25815
Apo	4020	4030	HVRRDHVFEDS	10	1395.66	5.40851	0.014796	10000	1.52143	0.046943	15.2143	0.46943
BI8622	4021	4029	VRRDHVFED	8	1171.57	5.8022	0.004015	0	0	0	0	0
BI8622	4021	4029	VRRDHVFED	8	1171.57	5.78902	0.006485	10	0.999544	0.012695	12.4943	0.158688
BI8622	4021	4029	VRRDHVFED	8	1171.57	5.78982	0.006069	30	1.23607	0.030788	15.4509	0.38485
BI8622	4021	4029	VRRDHVFED	8	1171.57	5.77819	0.009968	100	1.59161	0.01628	19.8951	0.2035
BI8622	4021	4029	VRRDHVFED	8	1171.57	5.79469	0.008689	1000	1.70067	0.012305	21.2584	0.153812
BI8622	4021	4029	VRRDHVFED	8	1171.57	5.78424	0.000866	10000	1.85105	0.032175	23.1381	0.402188
BI8626	4021	4029	VRRDHVFED	8	1171.57	5.81178	0.011599	0	0	0	0	0
BI8626	4021	4029	VRRDHVFED	8	1171.57	5.79126	0.001466	10	1.07752	0.008958	13.469	0.111975
BI8626	4021	4029	VRRDHVFED	8	1171.57	5.80911	0.003399	30	1.33791	0.018089	16.7239	0.226113
BI8626	4021	4029	VRRDHVFED	8	1171.57	5.78307	0.005111	100	1.62975	0.033738	20.3718	0.421725
BI8626	4021	4029	VRRDHVFED	8	1171.57	5.80085	0.00337	1000	1.75004	0.011216	21.8755	0.1402
BI8626	4021	4029	VRRDHVFED	8	1171.57	5.77463	0.002681	10000	1.88279	0.012963	23.5349	0.162038
Apo	4021	4029	VRRDHVFED	8	1171.57	5.80512	0.002928	0	0	0	0	0
Apo	4021	4029	VRRDHVFED	8	1171.57	5.81426	0.021065	10	1.02714	0.032963	12.8393	0.412038
Apo	4021	4029	VRRDHVFED	8	1171.57	5.79514	0.004187	30	1.26775	0.021477	15.8469	0.268462
Apo	4021	4029	VRRDHVFED	8	1171.57	5.78667	0.008599	100	1.57886	0.023552	19.7358	0.2944
Apo	4021	4029	VRRDHVFED	8	1171.57	5.7943	0.004834	1000	1.68602	0.024732	21.0752	0.30915
Apo	4021	4029	VRRDHVFED	8	1171.57	5.76616	0.000797	10000	1.85608	0.028728	23.201	0.3591
BI8622	4024	4029	DHVFED	5	760.302	6.54408	0.006466	0	0	0	0	0
BI8622	4024	4029	DHVFED	5	760.302	6.5186	0.005075	10	0.746042	0.030142	14.9208	0.60284
BI8622	4024	4029	DHVFED	5	760.302	6.52174	0.005252	30	0.912939	0.030697	18.2588	0.61394
BI8622	4024	4029	DHVFED	5	760.302	6.50444	0.008618	100	1.23276	0.030281	24.6552	0.60562
BI8622	4024	4029	DHVFED	5	760.302	6.52311	0.00786	1000	1.38314	0.035009	27.6627	0.70018
BI8622	4024	4029	DHVFED	5	760.302	6.51931	0.002911	10000	1.44298	0.028708	28.8596	0.57416
BI8626	4024	4029	DHVFED	5	760.302	6.55293	0.013838	0	0	0	0	0
BI8626	4024	4029	DHVFED	5	760.302	6.5266	0.002767	10	0.80599	0.015166	16.1198	0.30332
BI8626	4024	4029	DHVFED	5	760.302	6.52852	0.001462	30	0.981948	0.008476	19.639	0.16952
BI8626	4024	4029	DHVFED	5	760.302	6.51774	0.007015	100	1.27366	0.010216	25.4733	0.20432
BI8626	4024	4029	DHVFED	5	760.302	6.53033	0.003043	1000	1.44174	0.018421	28.8348	0.36842
BI8626	4024	4029	DHVFED	5	760.302	6.50808	0.001309	10000	1.4818	0.006442	29.636	0.12884
Apo	4024	4029	DHVFED	5	760.302	6.54643	0.002945	0	0	0	0	0
Apo	4024	4029	DHVFED	5	760.302	6.54283	0.018993	10	0.763755	0.019691	15.2751	0.39382
Apo	4024	4029	DHVFED	5	760.302	6.52135	0.008452	30	0.943562	0.013142	18.8712	0.26284
Apo	4024	4029	DHVFED	5	760.302	6.51936	0.007387	100	1.22308	0.022174	24.4617	0.44348
Apo	4024	4029	DHVFED	5	760.302	6.52638	0.005199	1000	1.40767	0.014225	28.1534	0.2845
Apo	4024	4029	DHVFED	5	760.302	6.49881	0.00238	10000	1.44446	0.019177	28.8892	0.38354
BI8622	4024	4031	DHVFEDSY	7	1010.4	7.42978	0.004579	0	0	0	0	0
BI8622	4024	4031	DHVFEDSY	7	1010.4	7.41358	0.001473	10	0.984933	0.039606	14.0705	0.5658
BI8622	4024	4031	DHVFEDSY	7	1010.4	7.41549	0.002386	30	1.10806	0.031495	15.8295	0.449929
BI8622	4024	4031	DHVFEDSY	7	1010.4	7.40862	0.002054	100	1.51994	0.105313	21.7134	1.50447
BI8622	4024	4031	DHVFEDSY	7	1010.4	7.41474	0.002421	1000	1.67216	0.046287	23.8879	0.661243
BI8622	4024	4031	DHVFEDSY	7	1010.4	7.41407	0.001404	10000	1.69249	0.047197	24.1784	0.674243
BI8626	4024	4031	DHVFEDSY	7	1010.4	7.40111	0.009139	0	0	0	0	0
BI8626	4024	4031	DHVFEDSY	7	1010.4	7.39563	0.006203	10	0.959869	0.031322	13.7124	0.447457
BI8626	4024	4031	DHVFEDSY	7	1010.4	7.39719	0.002316	30	1.08932	0.031179	15.5617	0.445414
BI8626	4024	4031	DHVFEDSY	7	1010.4	7.39451	0.006629	100	1.40531	0.096976	20.0758	1.38537
BI8626	4024	4031	DHVFEDSY	7	1010.4	7.40658	0.003095	1000	1.67232	0.012957	23.8903	0.1851
BI8626	4024	4031	DHVFEDSY	7	1010.4	7.39769	0.003208	10000	1.66889	0.02443	23.8412	0.349
Apo	4024	4031	DHVFEDSY	7	1010.4	7.42204	0.008547	0	0	0	0	0
Apo	4024	4031	DHVFEDSY	7	1010.4	7.43029	0.012391	10	0.962783	0.033761	13.754	0.4823
Apo	4024	4031	DHVFEDSY	7	1010.4	7.41522	0.008374	30	1.15743	0.041403	16.5347	0.591471
Apo	4024	4031	DHVFEDSY	7	1010.4	7.41406	0.008063	100	1.48535	0.113268	21.2192	1.61811
Apo	4024	4031	DHVFEDSY	7	1010.4	7.41979	0.00361	1000	1.68953	0.035606	24.1361	0.508657
Apo	4024	4031	DHVFEDSY	7	1010.4	7.40608	0.005965	10000	1.6805	0.021358	24.0071	0.305114
BI8622	4028	4032	EDSYR	4	668.276	4.72983	0.004151	0	0	0	0	0
BI8622	4028	4032	EDSYR	4	668.276	4.71418	0.003303	10	0.081397	0.00988	2.03492	0.247
BI8622	4028	4032	EDSYR	4	668.276	4.71734	0.004238	30	0.085833	0.011204	2.14583	0.2801
BI8622	4028	4032	EDSYR	4	668.276	4.70079	0.012857	100	0.066087	0.007896	1.65218	0.1974
BI8622	4028	4032	EDSYR	4	668.276	4.71607	0.011419	1000	0.058595	0.012038	1.46487	0.30095
BI8622	4028	4032	EDSYR	4	668.276	4.71527	0.002363	10000	0.168363	0.011149	4.20908	0.278725
BI8626	4028	4032	EDSYR	4	668.276	4.7334	0.007695	0	0	0	0	0
BI8626	4028	4032	EDSYR	4	668.276	4.71768	0.00441	10	0.100273	0.013268	2.50683	0.3317
BI8626	4028	4032	EDSYR	4	668.276	4.72146	0.001227	30	0.056535	0.014142	1.41338	0.35355
BI8626	4028	4032	EDSYR	4	668.276	4.71466	0.002873	100	0.099994	0.017548	2.49985	0.4387
BI8626	4028	4032	EDSYR	4	668.276	4.72585	0.005112	1000	0.100192	0.014795	2.5048	0.369875
BI8626	4028	4032	EDSYR	4	668.276	4.70756	0.003374	10000	0.17974	0.013533	4.4935	0.338325
Apo	4028	4032	EDSYR	4	668.276	4.72748	0.003008	0	0	0	0	0
Apo	4028	4032	EDSYR	4	668.276	4.74226	0.022691	10	0.068983	0.010938	1.72457	0.27345
Apo	4028	4032	EDSYR	4	668.276	4.71744	0.009469	30	0.055569	0.008024	1.38922	0.2006
Apo	4028	4032	EDSYR	4	668.276	4.71682	0.009752	100	0.0596	0.012922	1.49	0.32305
Apo	4028	4032	EDSYR	4	668.276	4.71838	0.004628	1000	0.043203	0.006837	1.08007	0.170925
Apo	4028	4032	EDSYR	4	668.276	4.68881	0.001667	10000	0.151781	0.019401	3.79453	0.485025
BI8622	4028	4034	EDSYREL	6	910.403	6.95923	0.005436	0	0	0	0	0
BI8622	4028	4034	EDSYREL	6	910.403	6.94388	0.004632	10	0.155828	0.012532	2.59713	0.208867
BI8622	4028	4034	EDSYREL	6	910.403	6.94566	0.003764	30	0.175335	0.022128	2.92225	0.3688
BI8622	4028	4034	EDSYREL	6	910.403	6.93376	0.004976	100	0.198885	0.023743	3.31475	0.395717
BI8622	4028	4034	EDSYREL	6	910.403	6.95175	0.007145	1000	0.329602	0.014763	5.49337	0.24605
BI8622	4028	4034	EDSYREL	6	910.403	6.94219	0.001522	10000	1.04625	0.016126	17.4374	0.268767
BI8626	4028	4034	EDSYREL	6	910.403	6.95957	0.007491	0	0	0	0	0
BI8626	4028	4034	EDSYREL	6	910.403	6.9472	0.005524	10	0.174581	0.020693	2.90968	0.344883
BI8626	4028	4034	EDSYREL	6	910.403	6.94982	0.004045	30	0.142014	0.022934	2.3669	0.382233
BI8626	4028	4034	EDSYREL	6	910.403	6.93968	0.005544	100	0.222312	0.022281	3.7052	0.37135
BI8626	4028	4034	EDSYREL	6	910.403	6.95725	0.002983	1000	0.338613	0.020736	5.64355	0.3456
BI8626	4028	4034	EDSYREL	6	910.403	6.93303	0.003113	10000	1.04916	0.021075	17.4859	0.35125
Apo	4028	4034	EDSYREL	6	910.403	6.95774	0.004246	0	0	0	0	0
Apo	4028	4034	EDSYREL	6	910.403	6.96054	0.016527	10	0.153665	0.008429	2.56108	0.140483
Apo	4028	4034	EDSYREL	6	910.403	6.94703	0.005671	30	0.128138	0.008174	2.13563	0.136233
Apo	4028	4034	EDSYREL	6	910.403	6.94456	0.007393	100	0.180298	0.007422	3.00497	0.1237
Apo	4028	4034	EDSYREL	6	910.403	6.9553	0.005301	1000	0.327518	0.024518	5.45863	0.408633
Apo	4028	4034	EDSYREL	6	910.403	6.92701	0.00401	10000	1.01581	0.02115	16.9301	0.3525
BI8622	4028	4047	EDSYRELHRKSPEEMKNRLY	18	2579.25	6.01103	0.004017	0	0	0	0	0
BI8622	4028	4047	EDSYRELHRKSPEEMKNRLY	18	2579.25	5.98149	0.013423	10	1.25705	0.026876	6.98362	0.149311
BI8622	4028	4047	EDSYRELHRKSPEEMKNRLY	18	2579.25	5.97874	0.006478	30	1.41503	0.008141	7.86126	0.0452278
BI8622	4028	4047	EDSYRELHRKSPEEMKNRLY	18	2579.25	5.96786	0.002345	100	1.55621	0.029513	8.64562	0.163961
BI8622	4028	4047	EDSYRELHRKSPEEMKNRLY	18	2579.25	6.00617	0.012527	1000	2.42776	0.042158	13.4875	0.234211
BI8622	4028	4047	EDSYRELHRKSPEEMKNRLY	18	2579.25	5.98363	0.006196	10000	4.37743	0.032095	24.319	0.178306
BI8626	4028	4047	EDSYRELHRKSPEEMKNRLY	18	2579.25	6.02053	0.012561	0	0	0	0	0
BI8626	4028	4047	EDSYRELHRKSPEEMKNRLY	18	2579.25	5.98362	0.009456	10	1.30809	0.026662	7.26716	0.148122
BI8626	4028	4047	EDSYRELHRKSPEEMKNRLY	18	2579.25	5.99805	0.005712	30	1.51629	0.018714	8.42383	0.103967
BI8626	4028	4047	EDSYRELHRKSPEEMKNRLY	18	2579.25	5.97219	0.007292	100	1.60679	0.015878	8.92663	0.0882111
BI8626	4028	4047	EDSYRELHRKSPEEMKNRLY	18	2579.25	6.00903	0.015494	1000	2.61766	0.021104	14.5426	0.117244
BI8626	4028	4047	EDSYRELHRKSPEEMKNRLY	18	2579.25	5.96825	0.003306	10000	4.38592	0.013285	24.3662	0.0738056
Apo	4028	4047	EDSYRELHRKSPEEMKNRLY	18	2579.25	6.01115	0.010112	0	0	0	0	0
Apo	4028	4047	EDSYRELHRKSPEEMKNRLY	18	2579.25	6.00534	0.02391	10	1.30705	0.041886	7.26138	0.2327
Apo	4028	4047	EDSYRELHRKSPEEMKNRLY	18	2579.25	5.98804	0.005594	30	1.43956	0.025212	7.99758	0.140067
Apo	4028	4047	EDSYRELHRKSPEEMKNRLY	18	2579.25	5.97677	0.010596	100	1.61313	0.028903	8.96186	0.160572
Apo	4028	4047	EDSYRELHRKSPEEMKNRLY	18	2579.25	5.99508	0.006182	1000	2.5198	0.022225	13.9989	0.123472
Apo	4028	4047	EDSYRELHRKSPEEMKNRLY	18	2579.25	5.96103	0.005852	10000	4.40899	0.056489	24.4944	0.313828
BI8622	4030	4047	SYRELHRKSPEEMKNRLY	16	2335.18	5.7501	0.004084	0	0	0	0	0
BI8622	4030	4047	SYRELHRKSPEEMKNRLY	16	2335.18	5.73625	0.012018	10	1.00365	0.012794	6.27284	0.0799625
BI8622	4030	4047	SYRELHRKSPEEMKNRLY	16	2335.18	5.73108	0.005158	30	1.14377	0.008881	7.14858	0.0555063
BI8622	4030	4047	SYRELHRKSPEEMKNRLY	16	2335.18	5.72248	0.00595	100	1.22486	0.12421	7.65537	0.776312
BI8622	4030	4047	SYRELHRKSPEEMKNRLY	16	2335.18	5.75748	0.01328	1000	2.10852	0.013813	13.1782	0.0863312
BI8622	4030	4047	SYRELHRKSPEEMKNRLY	16	2335.18	5.73289	0.001706	10000	3.8089	0.164659	23.8056	1.02912
BI8626	4030	4047	SYRELHRKSPEEMKNRLY	16	2335.18	5.75927	0.012	0	0	0	0	0
BI8626	4030	4047	SYRELHRKSPEEMKNRLY	16	2335.18	5.73563	0.002406	10	1.0539	0.022014	6.58686	0.137588
BI8626	4030	4047	SYRELHRKSPEEMKNRLY	16	2335.18	5.75333	0.006679	30	1.23855	0.022608	7.74096	0.1413
BI8626	4030	4047	SYRELHRKSPEEMKNRLY	16	2335.18	5.7245	0.005001	100	1.36453	0.019186	8.52834	0.119913
BI8626	4030	4047	SYRELHRKSPEEMKNRLY	16	2335.18	5.76222	0.023225	1000	2.21528	0.017699	13.8455	0.110619
BI8626	4030	4047	SYRELHRKSPEEMKNRLY	16	2335.18	5.72272	0.002754	10000	3.77304	0.018432	23.5815	0.1152
Apo	4030	4047	SYRELHRKSPEEMKNRLY	16	2335.18	5.75493	0.004105	0	0	0	0	0
Apo	4030	4047	SYRELHRKSPEEMKNRLY	16	2335.18	5.75375	0.017733	10	1.03021	0.031516	6.43883	0.196975
Apo	4030	4047	SYRELHRKSPEEMKNRLY	16	2335.18	5.74061	0.002226	30	1.16832	0.016913	7.30198	0.105706
Apo	4030	4047	SYRELHRKSPEEMKNRLY	16	2335.18	5.72708	0.008639	100	1.3066	0.020558	8.16626	0.128488
Apo	4030	4047	SYRELHRKSPEEMKNRLY	16	2335.18	5.74043	0.004814	1000	2.13837	0.025818	13.3648	0.161362
Apo	4030	4047	SYRELHRKSPEEMKNRLY	16	2335.18	5.71503	0.003902	10000	3.68698	0.032298	23.0436	0.201863
BI8622	4031	4041	YRELHRKSPEE	9	1442.73	4.58845	0.004915	0	0	0	0	0
BI8622	4031	4041	YRELHRKSPEE	9	1442.73	4.61522	0.007656	10	1.04997	0.016755	11.6663	0.186167
BI8622	4031	4041	YRELHRKSPEE	9	1442.73	4.63176	0.015873	30	1.21221	0.008535	13.469	0.0948333
BI8622	4031	4041	YRELHRKSPEE	9	1442.73	4.60325	0.003968	100	1.26338	0.016022	14.0376	0.178022
BI8622	4031	4041	YRELHRKSPEE	9	1442.73	4.61138	0.004957	1000	1.50503	0.008123	16.7225	0.0902556
BI8622	4031	4041	YRELHRKSPEE	9	1442.73	4.62049	0.000312	10000	2.05122	0.027162	22.7914	0.3018
BI8626	4031	4041	YRELHRKSPEE	9	1442.73	4.59826	0.01006	0	0	0	0	0
BI8626	4031	4041	YRELHRKSPEE	9	1442.73	4.61557	0.012756	10	1.06175	0.010576	11.7972	0.117511
BI8626	4031	4041	YRELHRKSPEE	9	1442.73	4.63109	0.017732	30	1.21998	0.022531	13.5553	0.250344
BI8626	4031	4041	YRELHRKSPEE	9	1442.73	4.61937	0.004338	100	1.27153	0.011037	14.1281	0.122633
BI8626	4031	4041	YRELHRKSPEE	9	1442.73	4.60735	0.006072	1000	1.48744	0.012019	16.5271	0.133544
BI8626	4031	4041	YRELHRKSPEE	9	1442.73	4.61884	0.001912	10000	2.08836	0.018762	23.204	0.208467
Apo	4031	4041	YRELHRKSPEE	9	1442.73	4.59158	0.00089	0	0	0	0	0
Apo	4031	4041	YRELHRKSPEE	9	1442.73	4.61578	0.013058	10	1.04052	0.015156	11.5614	0.1684
Apo	4031	4041	YRELHRKSPEE	9	1442.73	4.61658	0.007013	30	1.18401	0.016134	13.1556	0.179267
Apo	4031	4041	YRELHRKSPEE	9	1442.73	4.61782	0.010382	100	1.23682	0.021243	13.7425	0.236033
Apo	4031	4041	YRELHRKSPEE	9	1442.73	4.61286	0.001912	1000	1.49733	0.025698	16.637	0.285533
Apo	4031	4041	YRELHRKSPEE	9	1442.73	4.60417	0.009577	10000	2.03382	0.032375	22.598	0.359722
BI8622	4031	4046	YRELHRKSPEEMKNRL	14	2085.09	5.47095	0.010284	0	0	0	0	0
BI8622	4031	4046	YRELHRKSPEEMKNRL	14	2085.09	5.45592	0.014197	10	1.0303	0.009813	7.35929	0.0700929
BI8622	4031	4046	YRELHRKSPEEMKNRL	14	2085.09	5.45454	0.003134	30	1.15678	0.020019	8.26273	0.142993
BI8622	4031	4046	YRELHRKSPEEMKNRL	14	2085.09	5.44621	0.007797	100	1.28135	0.028819	9.15253	0.20585
BI8622	4031	4046	YRELHRKSPEEMKNRL	14	2085.09	5.48066	0.011864	1000	2.02563	0.090102	14.4688	0.643586
BI8622	4031	4046	YRELHRKSPEEMKNRL	14	2085.09	5.45654	0.002932	10000	3.24653	0.025092	23.1895	0.179229
BI8626	4031	4046	YRELHRKSPEEMKNRL	14	2085.09	5.47529	0.012138	0	0	0	0	0
BI8626	4031	4046	YRELHRKSPEEMKNRL	14	2085.09	5.45627	0.000948	10	1.06969	0.031107	7.64066	0.222193
BI8626	4031	4046	YRELHRKSPEEMKNRL	14	2085.09	5.48416	0.00725	30	1.24449	0.021794	8.88924	0.155671
BI8626	4031	4046	YRELHRKSPEEMKNRL	14	2085.09	5.44862	0.003801	100	1.32923	0.027635	9.49447	0.197393
BI8626	4031	4046	YRELHRKSPEEMKNRL	14	2085.09	5.48406	0.017087	1000	2.15992	0.02715	15.428	0.193929
BI8626	4031	4046	YRELHRKSPEEMKNRL	14	2085.09	5.44957	0.003466	10000	3.28415	0.021934	23.4582	0.156671
Apo	4031	4046	YRELHRKSPEEMKNRL	14	2085.09	5.48644	0.010414	0	0	0	0	0
Apo	4031	4046	YRELHRKSPEEMKNRL	14	2085.09	5.47689	0.019702	10	1.03782	0.031761	7.41299	0.226864
Apo	4031	4046	YRELHRKSPEEMKNRL	14	2085.09	5.46631	0.002734	30	1.17761	0.018646	8.41151	0.133186
Apo	4031	4046	YRELHRKSPEEMKNRL	14	2085.09	5.45035	0.006836	100	1.32923	0.023825	9.49446	0.170179
Apo	4031	4046	YRELHRKSPEEMKNRL	14	2085.09	5.47079	0.005942	1000	2.07994	0.075152	14.8567	0.5368
Apo	4031	4046	YRELHRKSPEEMKNRL	14	2085.09	5.43941	0.003098	10000	3.22139	0.023364	23.0099	0.166886
BI8622	4032	4046	RELHRKSPEEMKNRL	13	1922.03	5.11841	0.003645	0	0	0	0	0
BI8622	4032	4046	RELHRKSPEEMKNRL	13	1922.03	5.09492	0.010648	10	0.99226	0.053904	7.63277	0.414646
BI8622	4032	4046	RELHRKSPEEMKNRL	13	1922.03	5.09265	0.00436	30	1.09939	0.05212	8.45685	0.400923
BI8622	4032	4046	RELHRKSPEEMKNRL	13	1922.03	5.08472	0.00736	100	1.2273	0.030916	9.44074	0.237815
BI8622	4032	4046	RELHRKSPEEMKNRL	13	1922.03	5.10986	0.014	1000	1.93823	0.063133	14.9095	0.485638
BI8622	4032	4046	RELHRKSPEEMKNRL	13	1922.03	5.09097	0.002673	10000	3.3034	0.097148	25.4108	0.747292
BI8626	4032	4046	RELHRKSPEEMKNRL	13	1922.03	5.12519	0.011328	0	0	0	0	0
BI8626	4032	4046	RELHRKSPEEMKNRL	13	1922.03	5.09703	0.003398	10	1.03051	0.013629	7.92698	0.104838
BI8626	4032	4046	RELHRKSPEEMKNRL	13	1922.03	5.12131	0.00982	30	1.18189	0.021035	9.09148	0.161808
BI8626	4032	4046	RELHRKSPEEMKNRL	13	1922.03	5.08822	0.00758	100	1.29431	0.008397	9.95621	0.0645923
BI8626	4032	4046	RELHRKSPEEMKNRL	13	1922.03	5.11142	0.013015	1000	2.04429	0.039191	15.7253	0.301469
BI8626	4032	4046	RELHRKSPEEMKNRL	13	1922.03	5.07969	0.004279	10000	3.37301	0.037289	25.9462	0.286838
Apo	4032	4046	RELHRKSPEEMKNRL	13	1922.03	5.1218	0.000611	0	0	0	0	0
Apo	4032	4046	RELHRKSPEEMKNRL	13	1922.03	5.12218	0.023546	10	0.994881	0.029251	7.65293	0.225008
Apo	4032	4046	RELHRKSPEEMKNRL	13	1922.03	5.10085	0.003037	30	1.16492	0.028348	8.96096	0.218062
Apo	4032	4046	RELHRKSPEEMKNRL	13	1922.03	5.09407	0.008307	100	1.2498	0.016566	9.61383	0.127431
Apo	4032	4046	RELHRKSPEEMKNRL	13	1922.03	5.09886	0.003836	1000	2.01533	0.034883	15.5025	0.268331
Apo	4032	4046	RELHRKSPEEMKNRL	13	1922.03	5.07398	0.001732	10000	3.23917	0.059391	24.9167	0.456854
BI8622	4033	4047	ELHRKSPEEMKNRLY	13	1928.99	5.69448	0.003985	0	0	0	0	0
BI8622	4033	4047	ELHRKSPEEMKNRLY	13	1928.99	5.67836	0.008956	10	1.13195	0.01457	8.70732	0.112077
BI8622	4033	4047	ELHRKSPEEMKNRLY	13	1928.99	5.67801	0.003803	30	1.25637	0.030358	9.66435	0.233523
BI8622	4033	4047	ELHRKSPEEMKNRLY	13	1928.99	5.66721	0.005868	100	1.3931	0.023772	10.7162	0.182862
BI8622	4033	4047	ELHRKSPEEMKNRLY	13	1928.99	5.68903	0.007491	1000	2.12529	0.034526	16.3484	0.265585
BI8622	4033	4047	ELHRKSPEEMKNRLY	13	1928.99	5.67319	0.003015	10000	3.33278	0.025652	25.6368	0.197323
BI8626	4033	4047	ELHRKSPEEMKNRLY	13	1928.99	5.70179	0.009373	0	0	0	0	0
BI8626	4033	4047	ELHRKSPEEMKNRLY	13	1928.99	5.67825	0.001883	10	1.16224	0.023452	8.94035	0.1804
BI8626	4033	4047	ELHRKSPEEMKNRLY	13	1928.99	5.69393	0.004061	30	1.36775	0.017421	10.5211	0.134008
BI8626	4033	4047	ELHRKSPEEMKNRLY	13	1928.99	5.66919	0.004284	100	1.46896	0.013961	11.2997	0.107392
BI8626	4033	4047	ELHRKSPEEMKNRLY	13	1928.99	5.69445	0.008046	1000	2.25967	0.018376	17.3821	0.141354
BI8626	4033	4047	ELHRKSPEEMKNRLY	13	1928.99	5.66622	0.003987	10000	3.38753	0.015098	26.0579	0.116138
Apo	4033	4047	ELHRKSPEEMKNRLY	13	1928.99	5.69548	0.002675	0	0	0	0	0
Apo	4033	4047	ELHRKSPEEMKNRLY	13	1928.99	5.69951	0.01705	10	1.09929	0.043178	8.45611	0.332138
Apo	4033	4047	ELHRKSPEEMKNRLY	13	1928.99	5.68405	0.001352	30	1.27391	0.010803	9.79931	0.0831
Apo	4033	4047	ELHRKSPEEMKNRLY	13	1928.99	5.67262	0.007335	100	1.40106	0.012451	10.7774	0.0957769
Apo	4033	4047	ELHRKSPEEMKNRLY	13	1928.99	5.68371	0.005351	1000	2.1541	0.011021	16.57	0.0847769
Apo	4033	4047	ELHRKSPEEMKNRLY	13	1928.99	5.65674	0.004126	10000	3.29352	0.041801	25.3348	0.321546
BI8622	4035	4043	HRKSPEEMK	7	1140.57	4.04451	0.008564	0	0	0	0	0
BI8622	4035	4043	HRKSPEEMK	7	1140.57	4.0089	0.004358	10	0.855561	0.029677	12.2223	0.423957
BI8622	4035	4043	HRKSPEEMK	7	1140.57	4.01224	0.010815	30	0.938132	0.041638	13.4019	0.594829
BI8622	4035	4043	HRKSPEEMK	7	1140.57	4.00621	0.0108	100	0.980821	0.029406	14.0117	0.420086
BI8622	4035	4043	HRKSPEEMK	7	1140.57	4.01925	0.015219	1000	1.01267	0.033206	14.4668	0.474371
BI8622	4035	4043	HRKSPEEMK	7	1140.57	3.99962	0.009484	10000	1.50324	0.045491	21.4749	0.649871
BI8626	4035	4043	HRKSPEEMK	7	1140.57	4.05373	0.014962	0	0	0	0	0
BI8626	4035	4043	HRKSPEEMK	7	1140.57	4.0175	0.004518	10	0.888313	0.023191	12.6902	0.3313
BI8626	4035	4043	HRKSPEEMK	7	1140.57	4.03656	0.007321	30	0.93682	0.016788	13.3831	0.239829
BI8626	4035	4043	HRKSPEEMK	7	1140.57	4.01007	0.01025	100	1.02607	0.017245	14.6582	0.246357
BI8626	4035	4043	HRKSPEEMK	7	1140.57	4.02091	0.008059	1000	1.07019	0.02396	15.2884	0.342286
BI8626	4035	4043	HRKSPEEMK	7	1140.57	3.99044	0.007941	10000	1.56015	0.016048	22.2879	0.229257
Apo	4035	4043	HRKSPEEMK	7	1140.57	4.05321	0.000495	0	0	0	0	0
Apo	4035	4043	HRKSPEEMK	7	1140.57	4.05586	0.041396	10	0.780969	0.017676	11.1567	0.252514
Apo	4035	4043	HRKSPEEMK	7	1140.57	4.0108	0.009179	30	0.944383	0.020319	13.4912	0.290271
Apo	4035	4043	HRKSPEEMK	7	1140.57	4.00805	0.012585	100	0.947098	0.025039	13.53	0.3577
Apo	4035	4043	HRKSPEEMK	7	1140.57	4.02679	0.009201	1000	1.03314	0.018046	14.7592	0.2578
Apo	4035	4043	HRKSPEEMK	7	1140.57	3.99209	0.006239	10000	1.50026	0.049558	21.4323	0.707971
BI8622	4035	4046	HRKSPEEMKNRL	10	1523.8	5.04215	0.003767	0	0	0	0	0
BI8622	4035	4046	HRKSPEEMKNRL	10	1523.8	5.01659	0.008148	10	0.765724	0.026652	7.65724	0.26652
BI8622	4035	4046	HRKSPEEMKNRL	10	1523.8	5.01481	0.005705	30	0.844453	0.013119	8.44453	0.13119
BI8622	4035	4046	HRKSPEEMKNRL	10	1523.8	5.00513	0.007478	100	0.930189	0.006933	9.30189	0.06933
BI8622	4035	4046	HRKSPEEMKNRL	10	1523.8	5.024	0.008685	1000	1.57889	0.0165	15.7889	0.165
BI8622	4035	4046	HRKSPEEMKNRL	10	1523.8	5.01169	0.004169	10000	2.70038	0.031869	27.0038	0.31869
BI8626	4035	4046	HRKSPEEMKNRL	10	1523.8	5.05335	0.011349	0	0	0	0	0
BI8626	4035	4046	HRKSPEEMKNRL	10	1523.8	5.01855	0.00321	10	0.807967	0.019368	8.07967	0.19368
BI8626	4035	4046	HRKSPEEMKNRL	10	1523.8	5.03751	0.006285	30	0.891496	0.006553	8.91496	0.06553
BI8626	4035	4046	HRKSPEEMKNRL	10	1523.8	5.01068	0.007635	100	0.970708	0.014859	9.70708	0.14859
BI8626	4035	4046	HRKSPEEMKNRL	10	1523.8	5.03075	0.004994	1000	1.66537	0.009745	16.6537	0.09745
BI8626	4035	4046	HRKSPEEMKNRL	10	1523.8	5.00123	0.004022	10000	2.74826	0.013432	27.4826	0.13432
Apo	4035	4046	HRKSPEEMKNRL	10	1523.8	5.04902	0.002503	0	0	0	0	0
Apo	4035	4046	HRKSPEEMKNRL	10	1523.8	5.04683	0.025557	10	0.733166	0.016409	7.33166	0.16409
Apo	4035	4046	HRKSPEEMKNRL	10	1523.8	5.02197	0.002613	30	0.855135	0.018571	8.55135	0.18571
Apo	4035	4046	HRKSPEEMKNRL	10	1523.8	5.01556	0.008686	100	0.918453	0.018164	9.18453	0.18164
Apo	4035	4046	HRKSPEEMKNRL	10	1523.8	5.02099	0.005598	1000	1.62089	0.016927	16.2089	0.16927
Apo	4035	4046	HRKSPEEMKNRL	10	1523.8	4.99618	0.001032	10000	2.6558	0.022246	26.558	0.22246
BI8622	4035	4047	HRKSPEEMKNRLY	11	1686.86	5.46946	0.003973	0	0	0	0	0
BI8622	4035	4047	HRKSPEEMKNRLY	11	1686.86	5.45713	0.008289	10	0.743424	0.012851	6.7584	0.116827
BI8622	4035	4047	HRKSPEEMKNRLY	11	1686.86	5.46225	0.004275	30	0.819891	0.021658	7.45355	0.196891
BI8622	4035	4047	HRKSPEEMKNRLY	11	1686.86	5.45885	0.01424	100	0.919974	0.017986	8.3634	0.163509
BI8622	4035	4047	HRKSPEEMKNRLY	11	1686.86	5.4692	0.010695	1000	1.61932	0.020875	14.7211	0.189773
BI8622	4035	4047	HRKSPEEMKNRLY	11	1686.86	5.45635	0.001222	10000	2.79651	0.026085	25.4229	0.237136
BI8626	4035	4047	HRKSPEEMKNRLY	11	1686.86	5.47785	0.01232	0	0	0	0	0
BI8626	4035	4047	HRKSPEEMKNRLY	11	1686.86	5.4597	0.003353	10	0.807457	0.01988	7.34052	0.180727
BI8626	4035	4047	HRKSPEEMKNRLY	11	1686.86	5.47923	0.004591	30	0.892272	0.025452	8.11156	0.231382
BI8626	4035	4047	HRKSPEEMKNRLY	11	1686.86	5.45234	0.004385	100	1.0061	0.030826	9.14635	0.280236
BI8626	4035	4047	HRKSPEEMKNRLY	11	1686.86	5.4715	0.004315	1000	1.76679	0.01769	16.0618	0.160818
BI8626	4035	4047	HRKSPEEMKNRLY	11	1686.86	5.45001	0.008089	10000	2.84359	0.021569	25.8509	0.196082
Apo	4035	4047	HRKSPEEMKNRLY	11	1686.86	5.4779	0.002067	0	0	0	0	0
Apo	4035	4047	HRKSPEEMKNRLY	11	1686.86	5.48392	0.017042	10	0.780098	0.036434	7.0918	0.331218
Apo	4035	4047	HRKSPEEMKNRLY	11	1686.86	5.46527	0.001067	30	0.847793	0.026377	7.70721	0.239791
Apo	4035	4047	HRKSPEEMKNRLY	11	1686.86	5.46703	0.007868	100	0.966714	0.0226	8.78831	0.205455
Apo	4035	4047	HRKSPEEMKNRLY	11	1686.86	5.46846	0.007044	1000	1.68169	0.012092	15.2881	0.109927
Apo	4035	4047	HRKSPEEMKNRLY	11	1686.86	5.44506	0.006061	10000	2.81021	0.030711	25.5474	0.279191
BI8622	4042	4046	MKNRL	4	660.374	5.15338	0.008435	0	0	0	0	0
BI8622	4042	4046	MKNRL	4	660.374	5.20542	0.009527	10	0.027695	0.018572	0.692375	0.4643
BI8622	4042	4046	MKNRL	4	660.374	5.22236	0.014557	30	0.03885	0.020551	0.97125	0.513775
BI8622	4042	4046	MKNRL	4	660.374	5.18609	0.001509	100	0.133013	0.017072	3.32532	0.4268
BI8622	4042	4046	MKNRL	4	660.374	5.19674	0.006216	1000	0.597987	0.014686	14.9497	0.36715
BI8622	4042	4046	MKNRL	4	660.374	5.20571	0.001879	10000	1.17492	0.016195	29.3731	0.404875
BI8626	4042	4046	MKNRL	4	660.374	5.16778	0.011902	0	0	0	0	0
BI8626	4042	4046	MKNRL	4	660.374	5.2043	0.013242	10	0.076004	0.035307	1.9001	0.882675
BI8626	4042	4046	MKNRL	4	660.374	5.219	0.006508	30	0.058511	0.042841	1.46277	1.07102
BI8626	4042	4046	MKNRL	4	660.374	5.20369	0.006351	100	0.138865	0.019939	3.47162	0.498475
BI8626	4042	4046	MKNRL	4	660.374	5.19215	0.009694	1000	0.617939	0.018453	15.4485	0.461325
BI8626	4042	4046	MKNRL	4	660.374	5.20297	0.000998	10000	1.20912	0.019039	30.2281	0.475975
Apo	4042	4046	MKNRL	4	660.374	5.16678	0.009566	0	0	0	0	0
Apo	4042	4046	MKNRL	4	660.374	5.20451	0.01048	10	0.052583	0.026204	1.31458	0.6551
Apo	4042	4046	MKNRL	4	660.374	5.20367	0.00568	30	0.088808	0.020784	2.2202	0.5196
Apo	4042	4046	MKNRL	4	660.374	5.20454	0.01083	100	0.131839	0.019516	3.29598	0.4879
Apo	4042	4046	MKNRL	4	660.374	5.19771	0.004582	1000	0.598419	0.018371	14.9605	0.459275
Apo	4042	4046	MKNRL	4	660.374	5.19117	0.013554	10000	1.18074	0.011871	29.5184	0.296775
BI8622	4048	4065	IVFEGEEGQDAGGLLREW	17	2003.96	9.40409	0.004355	0	0	0	0	0
BI8622	4048	4065	IVFEGEEGQDAGGLLREW	17	2003.96	9.39513	0.002475	10	4.05964	0.062794	23.8802	0.369376
BI8622	4048	4065	IVFEGEEGQDAGGLLREW	17	2003.96	9.39338	0.002146	30	4.51464	0.059509	26.5567	0.350053
BI8622	4048	4065	IVFEGEEGQDAGGLLREW	17	2003.96	9.38189	0.001854	100	5.03911	0.043083	29.6418	0.253429
BI8622	4048	4065	IVFEGEEGQDAGGLLREW	17	2003.96	9.39605	0.001742	1000	5.89733	0.128015	34.6902	0.753029
BI8622	4048	4065	IVFEGEEGQDAGGLLREW	17	2003.96	9.38805	0.002488	10000	6.79933	0.076297	39.9961	0.448806
BI8626	4048	4065	IVFEGEEGQDAGGLLREW	17	2003.96	9.39683	0.005852	0	0	0	0	0
BI8626	4048	4065	IVFEGEEGQDAGGLLREW	17	2003.96	9.39726	0.005368	10	4.28675	0.055164	25.2162	0.324494
BI8626	4048	4065	IVFEGEEGQDAGGLLREW	17	2003.96	9.39235	0.003205	30	4.73685	0.028232	27.8638	0.166071
BI8626	4048	4065	IVFEGEEGQDAGGLLREW	17	2003.96	9.38904	0.003574	100	5.13755	0.069665	30.2209	0.409794
BI8626	4048	4065	IVFEGEEGQDAGGLLREW	17	2003.96	9.39428	0.003118	1000	6.08068	0.071559	35.7687	0.420935
BI8626	4048	4065	IVFEGEEGQDAGGLLREW	17	2003.96	9.38139	0.000992	10000	6.85033	0.042848	40.2961	0.252047
Apo	4048	4065	IVFEGEEGQDAGGLLREW	17	2003.96	9.40105	0.001545	0	0	0	0	0
Apo	4048	4065	IVFEGEEGQDAGGLLREW	17	2003.96	9.40429	0.010926	10	4.23128	0.086986	24.8899	0.511682
Apo	4048	4065	IVFEGEEGQDAGGLLREW	17	2003.96	9.39256	0.005613	30	4.62634	0.030981	27.2138	0.182241
Apo	4048	4065	IVFEGEEGQDAGGLLREW	17	2003.96	9.38752	0.005279	100	5.12417	0.071541	30.1422	0.420829
Apo	4048	4065	IVFEGEEGQDAGGLLREW	17	2003.96	9.39434	0.004272	1000	5.97784	0.062344	35.1638	0.366729
Apo	4048	4065	IVFEGEEGQDAGGLLREW	17	2003.96	9.38011	0.006099	10000	6.88125	0.037166	40.478	0.218624
BI8622	4051	4061	EGEEGQDAGGL	10	1060.43	6.74049	0.007939	0	0	0	0	0
BI8622	4051	4061	EGEEGQDAGGL	10	1060.43	6.76169	0.007302	10	3.58252	0.071396	35.8252	0.71396
BI8622	4051	4061	EGEEGQDAGGL	10	1060.43	6.77355	0.015752	30	3.62965	0.082002	36.2965	0.82002
BI8622	4051	4061	EGEEGQDAGGL	10	1060.43	6.74039	0.002068	100	3.71235	0.073071	37.1235	0.73071
BI8622	4051	4061	EGEEGQDAGGL	10	1060.43	6.7653	0.003193	1000	3.73564	0.049209	37.3564	0.49209
BI8622	4051	4061	EGEEGQDAGGL	10	1060.43	6.77219	0.00438	10000	3.67333	0.053863	36.7333	0.53863
BI8626	4051	4061	EGEEGQDAGGL	10	1060.43	6.73082	0.030924	0	0	0	0	0
BI8626	4051	4061	EGEEGQDAGGL	10	1060.43	6.75984	0.012956	10	3.36374	0.166383	33.6374	1.66383
BI8626	4051	4061	EGEEGQDAGGL	10	1060.43	6.77034	0.004232	30	3.4657	0.165533	34.657	1.65533
BI8626	4051	4061	EGEEGQDAGGL	10	1060.43	6.76124	0.007047	100	3.48314	0.154475	34.8314	1.54475
BI8626	4051	4061	EGEEGQDAGGL	10	1060.43	6.75936	0.00343	1000	3.50697	0.14467	35.0697	1.4467
BI8626	4051	4061	EGEEGQDAGGL	10	1060.43	6.76778	0.002305	10000	3.51915	0.145817	35.1915	1.45817
Apo	4051	4061	EGEEGQDAGGL	10	1060.43	6.70194	0.000692	0	0	0	0	0
Apo	4051	4061	EGEEGQDAGGL	10	1060.43	6.76271	0.01155	10	3.36355	0.119381	33.6355	1.19381
Apo	4051	4061	EGEEGQDAGGL	10	1060.43	6.76149	0.00996	30	3.40856	0.05836	34.0856	0.5836
Apo	4051	4061	EGEEGQDAGGL	10	1060.43	6.75919	0.011627	100	3.45159	0.077073	34.5159	0.77073
Apo	4051	4061	EGEEGQDAGGL	10	1060.43	6.76803	0.007239	1000	3.4872	0.050476	34.872	0.50476
Apo	4051	4061	EGEEGQDAGGL	10	1060.43	6.75773	0.003874	10000	3.40354	0.02873	34.0354	0.2873
BI8622	4051	4063	EGEEGQDAGGLLR	12	1329.62	7.10735	0.001323	0	0	0	0	0
BI8622	4051	4063	EGEEGQDAGGLLR	12	1329.62	7.08695	0.000556	10	4.4842	0.071262	37.3683	0.59385
BI8622	4051	4063	EGEEGQDAGGLLR	12	1329.62	7.08938	0.004887	30	4.78606	0.03329	39.8838	0.277417
BI8622	4051	4063	EGEEGQDAGGLLR	12	1329.62	7.07989	0.002975	100	5.2049	0.034878	43.3742	0.29065
BI8622	4051	4063	EGEEGQDAGGLLR	12	1329.62	7.08679	0.004215	1000	5.46556	0.034465	45.5463	0.287208
BI8622	4051	4063	EGEEGQDAGGLLR	12	1329.62	7.08357	0.001405	10000	5.55815	0.045867	46.3179	0.382225
BI8626	4051	4063	EGEEGQDAGGLLR	12	1329.62	7.10488	0.007564	0	0	0	0	0
BI8626	4051	4063	EGEEGQDAGGLLR	12	1329.62	7.08275	0.00503	10	4.62976	0.023753	38.5814	0.197942
BI8626	4051	4063	EGEEGQDAGGLLR	12	1329.62	7.08487	0.004287	30	5.01231	0.036801	41.7692	0.306675
BI8626	4051	4063	EGEEGQDAGGLLR	12	1329.62	7.07503	0.003219	100	5.28233	0.021648	44.0194	0.1804
BI8626	4051	4063	EGEEGQDAGGLLR	12	1329.62	7.08317	0.004522	1000	5.51051	0.022145	45.9209	0.184542
BI8626	4051	4063	EGEEGQDAGGLLR	12	1329.62	7.07755	0.001435	10000	5.53315	0.034019	46.1096	0.283492
Apo	4051	4063	EGEEGQDAGGLLR	12	1329.62	7.10428	0.00214	0	0	0	0	0
Apo	4051	4063	EGEEGQDAGGLLR	12	1329.62	7.10043	0.016323	10	4.57468	0.023734	38.1223	0.197783
Apo	4051	4063	EGEEGQDAGGLLR	12	1329.62	7.08558	0.007868	30	4.96751	0.045024	41.396	0.3752
Apo	4051	4063	EGEEGQDAGGLLR	12	1329.62	7.0877	0.008232	100	5.27951	0.012687	43.9959	0.105725
Apo	4051	4063	EGEEGQDAGGLLR	12	1329.62	7.0928	0.001976	1000	5.47253	0.026875	45.6044	0.223958
Apo	4051	4063	EGEEGQDAGGLLR	12	1329.62	7.07571	0.00425	10000	5.57236	0.043435	46.4364	0.361958
BI8622	4051	4065	EGEEGQDAGGLLREW	14	1644.74	8.97498	0.003004	0	0	0	0	0
BI8622	4051	4065	EGEEGQDAGGLLREW	14	1644.74	8.95999	0.0032	10	3.84226	0.092679	27.4447	0.661993
BI8622	4051	4065	EGEEGQDAGGLLREW	14	1644.74	8.95841	0.002659	30	4.1246	0.00851	29.4614	0.0607857
BI8622	4051	4065	EGEEGQDAGGLLREW	14	1644.74	8.94801	0.003836	100	4.69862	0.052008	33.5616	0.371486
BI8622	4051	4065	EGEEGQDAGGLLREW	14	1644.74	8.95408	0.003182	1000	5.37038	0.067545	38.3599	0.482464
BI8622	4051	4065	EGEEGQDAGGLLREW	14	1644.74	8.95341	0.005674	10000	5.96826	0.006896	42.6304	0.0492571
BI8626	4051	4065	EGEEGQDAGGLLREW	14	1644.74	8.97183	0.006256	0	0	0	0	0
BI8626	4051	4065	EGEEGQDAGGLLREW	14	1644.74	8.96364	0.00706	10	3.99612	0.024994	28.5437	0.178529
BI8626	4051	4065	EGEEGQDAGGLLREW	14	1644.74	8.95743	0.002611	30	4.43612	0.028323	31.6866	0.202307
BI8626	4051	4065	EGEEGQDAGGLLREW	14	1644.74	8.95268	0.004608	100	4.7849	0.012035	34.1778	0.0859643
BI8626	4051	4065	EGEEGQDAGGLLREW	14	1644.74	8.95588	0.001957	1000	5.47562	0.016863	39.1115	0.12045
BI8626	4051	4065	EGEEGQDAGGLLREW	14	1644.74	8.94289	0.001543	10000	5.99745	0.01053	42.8389	0.0752143
Apo	4051	4065	EGEEGQDAGGLLREW	14	1644.74	8.97077	0.001284	0	0	0	0	0
Apo	4051	4065	EGEEGQDAGGLLREW	14	1644.74	8.97462	0.012973	10	3.94944	0.025809	28.2103	0.18435
Apo	4051	4065	EGEEGQDAGGLLREW	14	1644.74	8.95883	0.007921	30	4.34111	0.079927	31.0079	0.570907
Apo	4051	4065	EGEEGQDAGGLLREW	14	1644.74	8.95339	0.007604	100	4.72823	0.028906	33.7731	0.206471
Apo	4051	4065	EGEEGQDAGGLLREW	14	1644.74	8.95876	0.004802	1000	5.43164	0.052752	38.7974	0.3768
Apo	4051	4065	EGEEGQDAGGLLREW	14	1644.74	8.94184	0.008259	10000	5.98089	0.03544	42.7206	0.253143
BI8622	4052	4065	GEEGQDAGGLLREW	13	1515.69	8.93015	0.003719	0	0	0	0	0
BI8622	4052	4065	GEEGQDAGGLLREW	13	1515.69	8.91131	0.0043	10	3.93266	0.068621	30.2512	0.527854
BI8622	4052	4065	GEEGQDAGGLLREW	13	1515.69	8.90986	0.002698	30	4.17259	0.009008	32.0968	0.0692923
BI8622	4052	4065	GEEGQDAGGLLREW	13	1515.69	8.89862	0.002832	100	4.72423	0.155354	36.3402	1.19503
BI8622	4052	4065	GEEGQDAGGLLREW	13	1515.69	8.90755	0.00275	1000	5.38556	0.121623	41.4274	0.935562
BI8622	4052	4065	GEEGQDAGGLLREW	13	1515.69	8.90414	0.005421	10000	6.03893	0.015053	46.4533	0.115792
BI8626	4052	4065	GEEGQDAGGLLREW	13	1515.69	8.92475	0.007058	0	0	0	0	0
BI8626	4052	4065	GEEGQDAGGLLREW	13	1515.69	8.91447	0.005948	10	4.06231	0.021864	31.2486	0.168185
BI8626	4052	4065	GEEGQDAGGLLREW	13	1515.69	8.9108	0.002255	30	4.49359	0.06312	34.5661	0.485538
BI8626	4052	4065	GEEGQDAGGLLREW	13	1515.69	8.90298	0.005221	100	4.772	0.01766	36.7077	0.135846
BI8626	4052	4065	GEEGQDAGGLLREW	13	1515.69	8.90766	0.000606	1000	5.47202	0.079072	42.0925	0.608246
BI8626	4052	4065	GEEGQDAGGLLREW	13	1515.69	8.89397	0.001936	10000	6.04781	0.029745	46.5216	0.228808
Apo	4052	4065	GEEGQDAGGLLREW	13	1515.69	8.92448	0.002266	0	0	0	0	0
Apo	4052	4065	GEEGQDAGGLLREW	13	1515.69	8.92666	0.013841	10	3.98467	0.060025	30.6513	0.461731
Apo	4052	4065	GEEGQDAGGLLREW	13	1515.69	8.91106	0.007849	30	4.3618	0.069174	33.5523	0.532108
Apo	4052	4065	GEEGQDAGGLLREW	13	1515.69	8.90514	0.007875	100	4.83236	0.057212	37.172	0.440092
Apo	4052	4065	GEEGQDAGGLLREW	13	1515.69	8.9104	0.004658	1000	5.47817	0.059162	42.1398	0.455092
Apo	4052	4065	GEEGQDAGGLLREW	13	1515.69	8.89297	0.008494	10000	6.09386	0.053819	46.8759	0.413992
BI8622	4055	4065	GQDAGGLLREW	10	1200.59	8.87591	0.00385	0	0	0	0	0
BI8622	4055	4065	GQDAGGLLREW	10	1200.59	8.85591	0.004536	10	2.41269	0.074029	24.1269	0.74029
BI8622	4055	4065	GQDAGGLLREW	10	1200.59	8.85521	0.003189	30	2.74915	0.025207	27.4915	0.25207
BI8622	4055	4065	GQDAGGLLREW	10	1200.59	8.84521	0.002551	100	3.25951	0.080366	32.5951	0.80366
BI8622	4055	4065	GQDAGGLLREW	10	1200.59	8.85294	0.004093	1000	3.94023	0.066421	39.4023	0.66421
BI8622	4055	4065	GQDAGGLLREW	10	1200.59	8.84948	0.004317	10000	4.55671	0.029016	45.567	0.29016
BI8626	4055	4065	GQDAGGLLREW	10	1200.59	8.87368	0.006436	0	0	0	0	0
BI8626	4055	4065	GQDAGGLLREW	10	1200.59	8.85852	0.005547	10	2.57856	0.023671	25.7856	0.23671
BI8626	4055	4065	GQDAGGLLREW	10	1200.59	8.85618	0.002297	30	2.94488	0.024273	29.4488	0.24273
BI8626	4055	4065	GQDAGGLLREW	10	1200.59	8.84872	0.004231	100	3.34585	0.015142	33.4585	0.15142
BI8626	4055	4065	GQDAGGLLREW	10	1200.59	8.85399	0.002158	1000	4.07709	0.019521	40.7709	0.19521
BI8626	4055	4065	GQDAGGLLREW	10	1200.59	8.84012	0.001466	10000	4.61263	0.00932	46.1263	0.0932
Apo	4055	4065	GQDAGGLLREW	10	1200.59	8.87125	0.001752	0	0	0	0	0
Apo	4055	4065	GQDAGGLLREW	10	1200.59	8.87142	0.014086	10	2.52161	0.013895	25.2161	0.13895
Apo	4055	4065	GQDAGGLLREW	10	1200.59	8.85683	0.006387	30	2.90711	0.053001	29.0711	0.53001
Apo	4055	4065	GQDAGGLLREW	10	1200.59	8.85004	0.008194	100	3.2722	0.017947	32.722	0.17947
Apo	4055	4065	GQDAGGLLREW	10	1200.59	8.85619	0.00571	1000	4.05159	0.040793	40.5159	0.40793
Apo	4055	4065	GQDAGGLLREW	10	1200.59	8.83872	0.007761	10000	4.59926	0.040188	45.9926	0.40188
BI8622	4057	4064	DAGGLLRE	7	829.429	7.11475	0.002472	0	0	0	0	0
BI8622	4057	4064	DAGGLLRE	7	829.429	7.08576	0.006653	10	1.99654	0.023984	28.522	0.342629
BI8622	4057	4064	DAGGLLRE	7	829.429	7.08872	0.003471	30	2.29118	0.01423	32.7311	0.203286
BI8622	4057	4064	DAGGLLRE	7	829.429	7.07583	0.00313	100	2.8548	0.027798	40.7829	0.397114
BI8622	4057	4064	DAGGLLRE	7	829.429	7.09231	0.005371	1000	3.34794	0.012411	47.8278	0.1773
BI8622	4057	4064	DAGGLLRE	7	829.429	7.08336	0.001688	10000	3.60511	0.015747	51.5016	0.224957
BI8626	4057	4064	DAGGLLRE	7	829.429	7.11579	0.008292	0	0	0	0	0
BI8626	4057	4064	DAGGLLRE	7	829.429	7.08905	0.006022	10	2.16319	0.014059	30.9027	0.200843
BI8626	4057	4064	DAGGLLRE	7	829.429	7.08847	0.003199	30	2.59551	0.020541	37.0787	0.293443
BI8626	4057	4064	DAGGLLRE	7	829.429	7.07672	0.004763	100	2.99952	0.027225	42.8503	0.388929
BI8626	4057	4064	DAGGLLRE	7	829.429	7.09587	0.00214	1000	3.46242	0.028627	49.4631	0.408957
BI8626	4057	4064	DAGGLLRE	7	829.429	7.07709	0.00222	10000	3.60927	0.010691	51.561	0.152729
Apo	4057	4064	DAGGLLRE	7	829.429	7.1136	0.003336	0	0	0	0	0
Apo	4057	4064	DAGGLLRE	7	829.429	7.10381	0.016521	10	2.13636	0.016195	30.5194	0.231357
Apo	4057	4064	DAGGLLRE	7	829.429	7.0877	0.007954	30	2.47269	0.043966	35.3241	0.628086
Apo	4057	4064	DAGGLLRE	7	829.429	7.08289	0.00772	100	2.92554	0.015203	41.7934	0.217186
Apo	4057	4064	DAGGLLRE	7	829.429	7.09786	0.003812	1000	3.39473	0.017487	48.4961	0.249814
Apo	4057	4064	DAGGLLRE	7	829.429	7.07116	0.005716	10000	3.612	0.020721	51.6	0.296014
BI8622	4057	4065	DAGGLLREW	8	1015.51	9.09261	0.003562	0	0	0	0	0
BI8622	4057	4065	DAGGLLREW	8	1015.51	9.06976	0.00485	10	1.88258	0.024154	23.5323	0.301925
BI8622	4057	4065	DAGGLLREW	8	1015.51	9.06584	0.002467	30	2.22817	0.005843	27.8521	0.0730375
BI8622	4057	4065	DAGGLLREW	8	1015.51	9.055	0.00166	100	2.78597	0.031832	34.8246	0.3979
BI8622	4057	4065	DAGGLLREW	8	1015.51	9.06746	0.000399	1000	3.4966	0.030614	43.7075	0.382675
BI8622	4057	4065	DAGGLLREW	8	1015.51	9.06296	0.004202	10000	4.07156	0.006527	50.8945	0.0815875
BI8626	4057	4065	DAGGLLREW	8	1015.51	9.08867	0.006598	0	0	0	0	0
BI8626	4057	4065	DAGGLLREW	8	1015.51	9.07504	0.008018	10	2.03979	0.037709	25.4973	0.471363
BI8626	4057	4065	DAGGLLREW	8	1015.51	9.0688	0.002706	30	2.4232	0.022593	30.29	0.282412
BI8626	4057	4065	DAGGLLREW	8	1015.51	9.06192	0.004022	100	2.85962	0.008685	35.7453	0.108563
BI8626	4057	4065	DAGGLLREW	8	1015.51	9.06694	0.002722	1000	3.57553	0.023393	44.6942	0.292413
BI8626	4057	4065	DAGGLLREW	8	1015.51	9.05355	0.00204	10000	4.09018	0.006417	51.1273	0.0802125
Apo	4057	4065	DAGGLLREW	8	1015.51	9.08882	0.001107	0	0	0	0	0
Apo	4057	4065	DAGGLLREW	8	1015.51	9.08275	0.013648	10	2.00394	0.037907	25.0492	0.473838
Apo	4057	4065	DAGGLLREW	8	1015.51	9.06906	0.005346	30	2.37582	0.03149	29.6977	0.393625
Apo	4057	4065	DAGGLLREW	8	1015.51	9.06294	0.006042	100	2.81874	0.017052	35.2342	0.21315
Apo	4057	4065	DAGGLLREW	8	1015.51	9.06879	0.005192	1000	3.55491	0.038789	44.4363	0.484862
Apo	4057	4065	DAGGLLREW	8	1015.51	9.0488	0.008382	10000	4.08604	0.019623	51.0755	0.245288
BI8622	4058	4065	AGGLLREW	7	900.481	8.71177	0.001076	0	0	0	0	0
BI8622	4058	4065	AGGLLREW	7	900.481	8.70738	0.004982	10	1.22082	0.035992	17.4403	0.514171
BI8622	4058	4065	AGGLLREW	7	900.481	8.70633	0.002935	30	1.55063	0.00817	22.1519	0.116714
BI8622	4058	4065	AGGLLREW	7	900.481	8.69671	0.001239	100	2.09907	0.035179	29.9868	0.502557
BI8622	4058	4065	AGGLLREW	7	900.481	8.70773	0.00246	1000	2.84672	0.041248	40.6674	0.589257
BI8622	4058	4065	AGGLLREW	7	900.481	8.7026	0.003289	10000	3.4695	0.008731	49.5643	0.124729
BI8626	4058	4065	AGGLLREW	7	900.481	8.71079	0.005979	0	0	0	0	0
BI8626	4058	4065	AGGLLREW	7	900.481	8.70896	0.003444	10	1.38173	0.017087	19.739	0.2441
BI8626	4058	4065	AGGLLREW	7	900.481	8.7095	0.003311	30	1.75317	0.02224	25.0452	0.317714
BI8626	4058	4065	AGGLLREW	7	900.481	8.7007	0.003586	100	2.17524	0.015222	31.0749	0.217457
BI8626	4058	4065	AGGLLREW	7	900.481	8.7084	0.002018	1000	2.92976	0.021913	41.8537	0.313043
BI8626	4058	4065	AGGLLREW	7	900.481	8.6938	0.002304	10000	3.47429	0.014798	49.6327	0.2114
Apo	4058	4065	AGGLLREW	7	900.481	8.70767	0.002083	0	0	0	0	0
Apo	4058	4065	AGGLLREW	7	900.481	8.71922	0.012918	10	1.37783	0.018174	19.6834	0.259629
Apo	4058	4065	AGGLLREW	7	900.481	8.70851	0.004959	30	1.68426	0.029083	24.0608	0.415471
Apo	4058	4065	AGGLLREW	7	900.481	8.70108	0.007881	100	2.15699	0.010413	30.8142	0.148757
Apo	4058	4065	AGGLLREW	7	900.481	8.70771	0.004249	1000	2.91276	0.031824	41.6108	0.454629
Apo	4058	4065	AGGLLREW	7	900.481	8.69592	0.013863	10000	3.44858	0.023236	49.2654	0.331943
BI8622	4062	4066	LREWY	4	765.38	8.0281	0.001123	0	0	0	0	0
BI8622	4062	4066	LREWY	4	765.38	8.07775	0.001427	10	0.095379	0.019002	2.38448	0.47505
BI8622	4062	4066	LREWY	4	765.38	8.08588	0.012143	30	0.160166	0.052337	4.00415	1.30842
BI8622	4062	4066	LREWY	4	765.38	8.06869	0.003153	100	0.274385	0.014009	6.85962	0.350225
BI8622	4062	4066	LREWY	4	765.38	8.06957	0.006126	1000	0.537187	0.021132	13.4297	0.5283
BI8622	4062	4066	LREWY	4	765.38	8.07315	0.004057	10000	1.02682	0.012977	25.6706	0.324425
BI8626	4062	4066	LREWY	4	765.38	8.04637	0.004516	0	0	0	0	0
BI8626	4062	4066	LREWY	4	765.38	8.08017	0.003721	10	0.12541	0.028605	3.13525	0.715125
BI8626	4062	4066	LREWY	4	765.38	8.08657	0.005281	30	0.169509	0.035326	4.23773	0.88315
BI8626	4062	4066	LREWY	4	765.38	8.08052	0.004835	100	0.229368	0.016593	5.7342	0.414825
BI8626	4062	4066	LREWY	4	765.38	8.06797	0.002155	1000	0.543569	0.013858	13.5892	0.34645
BI8626	4062	4066	LREWY	4	765.38	8.07845	0.002206	10000	1.03731	0.016271	25.9329	0.406775
Apo	4062	4066	LREWY	4	765.38	8.02711	0.00524	0	0	0	0	0
Apo	4062	4066	LREWY	4	765.38	8.07807	0.009556	10	0.120179	0.053939	3.00447	1.34848
Apo	4062	4066	LREWY	4	765.38	8.08315	0.005979	30	0.117706	0.047655	2.94265	1.19138
Apo	4062	4066	LREWY	4	765.38	8.08038	0.008192	100	0.202869	0.03279	5.07172	0.81975
Apo	4062	4066	LREWY	4	765.38	8.07589	0.000689	1000	0.463941	0.018873	11.5985	0.471825
Apo	4062	4066	LREWY	4	765.38	8.06552	0.007477	10000	0.975577	0.018323	24.3894	0.458075
BI8622	4062	4067	LREWYM	5	896.421	8.70108	0.001176	0	0	0	0	0
BI8622	4062	4067	LREWYM	5	896.421	8.76511	0.002426	10	0.037876	0.020624	0.75752	0.41248
BI8622	4062	4067	LREWYM	5	896.421	8.76695	0.012722	30	0.050182	0.021865	1.00364	0.4373
BI8622	4062	4067	LREWYM	5	896.421	8.75275	0.006318	100	0.142555	0.021475	2.8511	0.4295
BI8622	4062	4067	LREWYM	5	896.421	8.75674	0.007952	1000	0.528304	0.020435	10.5661	0.4087
BI8622	4062	4067	LREWYM	5	896.421	8.76586	0.00387	10000	1.27139	0.020418	25.4278	0.40836
BI8626	4062	4067	LREWYM	5	896.421	8.71713	0.005763	0	0	0	0	0
BI8626	4062	4067	LREWYM	5	896.421	8.76509	0.000224	10	0.049625	0.016942	0.9925	0.33884
BI8626	4062	4067	LREWYM	5	896.421	8.77095	0.004279	30	0.064905	0.013845	1.2981	0.2769
BI8626	4062	4067	LREWYM	5	896.421	8.76708	0.006921	100	0.144745	0.01005	2.8949	0.201
BI8626	4062	4067	LREWYM	5	896.421	8.75663	0.00132	1000	0.511077	0.009322	10.2215	0.18644
BI8626	4062	4067	LREWYM	5	896.421	8.77013	0.001928	10000	1.24776	0.013356	24.9552	0.26712
Apo	4062	4067	LREWYM	5	896.421	8.69981	0.004606	0	0	0	0	0
Apo	4062	4067	LREWYM	5	896.421	8.76011	0.009748	10	0.018244	0.019482	0.36488	0.38964
Apo	4062	4067	LREWYM	5	896.421	8.77182	0.007484	30	0.012396	0.023849	0.24792	0.47698
Apo	4062	4067	LREWYM	5	896.421	8.76502	0.010098	100	0.072164	0.023573	1.44328	0.47146
Apo	4062	4067	LREWYM	5	896.421	8.7646	0.00221	1000	0.440806	0.015817	8.81612	0.31634
Apo	4062	4067	LREWYM	5	896.421	8.75616	0.006011	10000	1.16736	0.016488	23.3472	0.32976
BI8622	4065	4072	WYMIISRE	7	1096.54	8.74272	0.003995	0	0	0	0	0
BI8622	4065	4072	WYMIISRE	7	1096.54	8.79302	0.002684	10	0.177687	0.020719	2.53839	0.295986
BI8622	4065	4072	WYMIISRE	7	1096.54	8.7944	0.015139	30	0.164711	0.024709	2.35301	0.352986
BI8622	4065	4072	WYMIISRE	7	1096.54	8.77484	0.004054	100	0.20719	0.026727	2.95986	0.381814
BI8622	4065	4072	WYMIISRE	7	1096.54	8.78375	0.009427	1000	0.276936	0.028853	3.95623	0.412186
BI8622	4065	4072	WYMIISRE	7	1096.54	8.79058	0.003099	10000	1.03134	0.014746	14.7335	0.210657
BI8626	4065	4072	WYMIISRE	7	1096.54	8.75435	0.00487	0	0	0	0	0
BI8626	4065	4072	WYMIISRE	7	1096.54	8.79551	0.002583	10	0.144122	0.053798	2.05889	0.768543
BI8626	4065	4072	WYMIISRE	7	1096.54	8.79813	0.003277	30	0.124337	0.032485	1.77624	0.464071
BI8626	4065	4072	WYMIISRE	7	1096.54	8.79391	0.009601	100	0.128175	0.015089	1.83107	0.215557
BI8626	4065	4072	WYMIISRE	7	1096.54	8.78045	0.002441	1000	0.240369	0.02125	3.43384	0.303571
BI8626	4065	4072	WYMIISRE	7	1096.54	8.79588	0.000622	10000	1.01923	0.016246	14.5604	0.232086
Apo	4065	4072	WYMIISRE	7	1096.54	8.74119	0.004245	0	0	0	0	0
Apo	4065	4072	WYMIISRE	7	1096.54	8.79106	0.000573	10	0.15137	0.074102	2.16243	1.0586
Apo	4065	4072	WYMIISRE	7	1096.54	8.79641	0.008375	30	0.150771	0.052287	2.15387	0.746957
Apo	4065	4072	WYMIISRE	7	1096.54	8.79021	0.012634	100	0.155138	0.048618	2.21626	0.694543
Apo	4065	4072	WYMIISRE	7	1096.54	8.79074	0.001971	1000	0.2257	0.034948	3.22429	0.499257
Apo	4065	4072	WYMIISRE	7	1096.54	8.77854	0.008737	10000	0.97685	0.040334	13.955	0.5762
BI8622	4066	4071	YMIISR	5	781.415	7.111	0.004649	0	0	0	0	0
BI8622	4066	4071	YMIISR	5	781.415	7.0881	0.004509	10	0.083456	0.029693	1.66912	0.59386
BI8622	4066	4071	YMIISR	5	781.415	7.09055	0.001915	30	0.064183	0.026719	1.28366	0.53438
BI8622	4066	4071	YMIISR	5	781.415	7.07902	0.002571	100	0.08537	0.033442	1.7074	0.66884
BI8622	4066	4071	YMIISR	5	781.415	7.09686	0.005662	1000	0.024052	0.022231	0.48104	0.44462
BI8622	4066	4071	YMIISR	5	781.415	7.08685	0.001565	10000	0.244041	0.017534	4.88082	0.35068
BI8626	4066	4071	YMIISR	5	781.415	7.11044	0.008353	0	0	0	0	0
BI8626	4066	4071	YMIISR	5	781.415	7.08982	0.007466	10	0.097857	0.030115	1.95714	0.6023
BI8626	4066	4071	YMIISR	5	781.415	7.08904	0.002554	30	0.024219	0.019087	0.48438	0.38174
BI8626	4066	4071	YMIISR	5	781.415	7.0813	0.00535	100	0.117035	0.019397	2.3407	0.38794
BI8626	4066	4071	YMIISR	5	781.415	7.09773	0.005042	1000	0.048074	0.030991	0.96148	0.61982
BI8626	4066	4071	YMIISR	5	781.415	7.07567	0.002485	10000	0.266573	0.017899	5.33146	0.35798
Apo	4066	4071	YMIISR	5	781.415	7.10741	0.002876	0	0	0	0	0
Apo	4066	4071	YMIISR	5	781.415	7.10608	0.016463	10	0.111354	0.008006	2.22708	0.16012
Apo	4066	4071	YMIISR	5	781.415	7.08953	0.006821	30	0.039234	0.008749	0.78468	0.17498
Apo	4066	4071	YMIISR	5	781.415	7.08756	0.008135	100	0.097751	0.028893	1.95502	0.57786
Apo	4066	4071	YMIISR	5	781.415	7.09794	0.004328	1000	0.108195	0.007283	2.1639	0.14566
Apo	4066	4071	YMIISR	5	781.415	7.07126	0.004529	10000	0.266709	0.004489	5.33418	0.08978
BI8622	4067	4071	MIISR	4	618.352	6.08779	0.002976	0	0	0	0	0
BI8622	4067	4071	MIISR	4	618.352	6.07513	0.003396	10	0.090002	0.026679	2.25005	0.666975
BI8622	4067	4071	MIISR	4	618.352	6.07735	0.003737	30	0.088455	0.007583	2.21138	0.189575
BI8622	4067	4071	MIISR	4	618.352	6.06724	0.005557	100	0.089458	0.013023	2.23645	0.325575
BI8622	4067	4071	MIISR	4	618.352	6.08315	0.003419	1000	0.054086	0.008474	1.35215	0.21185
BI8622	4067	4071	MIISR	4	618.352	6.07766	0.001822	10000	0.186805	0.011979	4.67012	0.299475
BI8626	4067	4071	MIISR	4	618.352	6.09349	0.008699	0	0	0	0	0
BI8626	4067	4071	MIISR	4	618.352	6.07808	0.003872	10	0.118149	0.034181	2.95372	0.854525
BI8626	4067	4071	MIISR	4	618.352	6.08524	0.002059	30	0.083198	0.035362	2.07995	0.88405
BI8626	4067	4071	MIISR	4	618.352	6.07418	0.004251	100	0.107787	0.032246	2.69467	0.80615
BI8626	4067	4071	MIISR	4	618.352	6.08807	0.002662	1000	0.066706	0.033438	1.66765	0.83595
BI8626	4067	4071	MIISR	4	618.352	6.06844	0.002247	10000	0.226209	0.033299	5.65522	0.832475
Apo	4067	4071	MIISR	4	618.352	6.08718	0.002421	0	0	0	0	0
Apo	4067	4071	MIISR	4	618.352	6.09499	0.016991	10	0.07347	0.019764	1.83675	0.4941
Apo	4067	4071	MIISR	4	618.352	6.07761	0.005046	30	0.059161	0.022222	1.47903	0.55555
Apo	4067	4071	MIISR	4	618.352	6.07528	0.007044	100	0.103731	0.024399	2.59328	0.609975
Apo	4067	4071	MIISR	4	618.352	6.08588	0.004624	1000	0.052929	0.024317	1.32322	0.607925
Apo	4067	4071	MIISR	4	618.352	6.06106	0.002809	10000	0.234607	0.037624	5.86518	0.9406
BI8622	4067	4078	MIISREMFNPMY	10	1530.7	9.10749	0.001974	0	0	0	0	0
BI8622	4067	4078	MIISREMFNPMY	10	1530.7	9.14248	0.0037	10	0.839127	0.045782	8.39127	0.45782
BI8622	4067	4078	MIISREMFNPMY	10	1530.7	9.14461	0.009439	30	0.810591	0.020031	8.10591	0.20031
BI8622	4067	4078	MIISREMFNPMY	10	1530.7	9.13639	0.006194	100	0.811001	0.022582	8.11001	0.22582
BI8622	4067	4078	MIISREMFNPMY	10	1530.7	9.12989	0.008153	1000	1.17769	0.024249	11.7769	0.24249
BI8622	4067	4078	MIISREMFNPMY	10	1530.7	9.13738	0.003823	10000	2.61473	0.043772	26.1473	0.43772
BI8626	4067	4078	MIISREMFNPMY	10	1530.7	9.12096	0.00504	0	0	0	0	0
BI8626	4067	4078	MIISREMFNPMY	10	1530.7	9.14514	0.010796	10	0.830287	0.018271	8.30287	0.18271
BI8626	4067	4078	MIISREMFNPMY	10	1530.7	9.14757	0.008588	30	0.837864	0.015889	8.37864	0.15889
BI8626	4067	4078	MIISREMFNPMY	10	1530.7	9.14274	0.007159	100	0.876597	0.023658	8.76597	0.23658
BI8626	4067	4078	MIISREMFNPMY	10	1530.7	9.12856	0.002027	1000	1.18029	0.015387	11.8029	0.15387
BI8626	4067	4078	MIISREMFNPMY	10	1530.7	9.14205	0.001727	10000	2.50088	0.048898	25.0088	0.48898
Apo	4067	4078	MIISREMFNPMY	10	1530.7	9.11075	0.005117	0	0	0	0	0
Apo	4067	4078	MIISREMFNPMY	10	1530.7	9.14152	0.007649	10	0.821863	0.018837	8.21863	0.18837
Apo	4067	4078	MIISREMFNPMY	10	1530.7	9.14752	0.005101	30	0.820062	0.02803	8.20062	0.2803
Apo	4067	4078	MIISREMFNPMY	10	1530.7	9.14118	0.007658	100	0.847001	0.030013	8.47001	0.30013
Apo	4067	4078	MIISREMFNPMY	10	1530.7	9.13464	0.001787	1000	1.1644	0.022388	11.644	0.22388
Apo	4067	4078	MIISREMFNPMY	10	1530.7	9.12607	0.008365	10000	2.56079	0.080556	25.6078	0.80556
BI8622	4067	4080	MIISREMFNPMYAL	12	1714.82	9.83818	0.002248	0	0	0	0	0
BI8622	4067	4080	MIISREMFNPMYAL	12	1714.82	9.86574	0.001837	10	1.10481	0.026959	9.20675	0.224658
BI8622	4067	4080	MIISREMFNPMYAL	12	1714.82	9.86594	0.008096	30	1.2474	0.031654	10.395	0.263783
BI8622	4067	4080	MIISREMFNPMYAL	12	1714.82	9.86085	0.006792	100	1.54993	0.02768	12.9161	0.230667
BI8622	4067	4080	MIISREMFNPMYAL	12	1714.82	9.8451	0.009818	1000	2.07576	0.019199	17.298	0.159992
BI8622	4067	4080	MIISREMFNPMYAL	12	1714.82	9.85419	0.00459	10000	3.7437	0.039181	31.1975	0.326508
BI8626	4067	4080	MIISREMFNPMYAL	12	1714.82	9.84885	0.008308	0	0	0	0	0
BI8626	4067	4080	MIISREMFNPMYAL	12	1714.82	9.87135	0.01039	10	1.11685	0.021025	9.30708	0.175208
BI8626	4067	4080	MIISREMFNPMYAL	12	1714.82	9.87063	0.010708	30	1.25012	0.029829	10.4177	0.248575
BI8626	4067	4080	MIISREMFNPMYAL	12	1714.82	9.86391	0.006263	100	1.61694	0.02092	13.4745	0.174333
BI8626	4067	4080	MIISREMFNPMYAL	12	1714.82	9.84379	0.001457	1000	2.08146	0.020895	17.3455	0.174125
BI8626	4067	4080	MIISREMFNPMYAL	12	1714.82	9.86201	0.006822	10000	3.63729	0.032304	30.3107	0.2692
Apo	4067	4080	MIISREMFNPMYAL	12	1714.82	9.84808	0.003732	0	0	0	0	0
Apo	4067	4080	MIISREMFNPMYAL	12	1714.82	9.87161	0.00981	10	1.06597	0.037699	8.88307	0.314158
Apo	4067	4080	MIISREMFNPMYAL	12	1714.82	9.87061	0.011513	30	1.25528	0.059556	10.4607	0.4963
Apo	4067	4080	MIISREMFNPMYAL	12	1714.82	9.86035	0.006315	100	1.56648	0.035391	13.054	0.294925
Apo	4067	4080	MIISREMFNPMYAL	12	1714.82	9.84792	0.005411	1000	2.01595	0.042189	16.7996	0.351575
Apo	4067	4080	MIISREMFNPMYAL	12	1714.82	9.84141	0.008432	10000	3.61086	0.035731	30.0905	0.297758
BI8622	4068	4072	IISRE	4	616.354	4.84586	0.006287	0	0	0	0	0
BI8622	4068	4072	IISRE	4	616.354	4.88845	0.007164	10	0.023038	0.012792	0.57595	0.3198
BI8622	4068	4072	IISRE	4	616.354	4.90227	0.01276	30	0.032827	0.022724	0.820675	0.5681
BI8622	4068	4072	IISRE	4	616.354	4.86876	0.001456	100	0.049957	0.017421	1.24893	0.435525
BI8622	4068	4072	IISRE	4	616.354	4.87814	0.006575	1000	0.060732	0.015055	1.5183	0.376375
BI8622	4068	4072	IISRE	4	616.354	4.88709	0.001417	10000	0.473268	0.009255	11.8317	0.231375
BI8626	4068	4072	IISRE	4	616.354	4.86016	0.01191	0	0	0	0	0
BI8626	4068	4072	IISRE	4	616.354	4.88996	0.008282	10	0.005799	0.028365	0.144975	0.709125
BI8626	4068	4072	IISRE	4	616.354	4.8968	0.004438	30	-0.002732	0.046683	-0.0683	1.16708
BI8626	4068	4072	IISRE	4	616.354	4.88598	0.00817	100	-0.017371	0.008564	-0.434275	0.2141
BI8626	4068	4072	IISRE	4	616.354	4.87285	0.006978	1000	0.023041	0.007134	0.576025	0.17835
BI8626	4068	4072	IISRE	4	616.354	4.88895	0.002615	10000	0.464553	0.008329	11.6138	0.208225
Apo	4068	4072	IISRE	4	616.354	4.85295	0.002146	0	0	0	0	0
Apo	4068	4072	IISRE	4	616.354	4.88534	0.008468	10	0.06609	0.052593	1.65225	1.31482
Apo	4068	4072	IISRE	4	616.354	4.89141	0.003536	30	0.046035	0.040283	1.15088	1.00707
Apo	4068	4072	IISRE	4	616.354	4.88593	0.010317	100	0.025711	0.028533	0.642775	0.713325
Apo	4068	4072	IISRE	4	616.354	4.88342	0.00233	1000	0.064915	0.031359	1.62288	0.783975
Apo	4068	4072	IISRE	4	616.354	4.87238	0.011739	10000	0.489336	0.030566	12.2334	0.76415
BI8622	4072	4077	EMFNPM	4	767.298	8.76078	0.002792	0	0	0	0	0
BI8622	4072	4077	EMFNPM	4	767.298	8.74987	0.003393	10	0.781334	0.014123	19.5333	0.353075
BI8622	4072	4077	EMFNPM	4	767.298	8.74965	0.002293	30	0.744487	0.010755	18.6122	0.268875
BI8622	4072	4077	EMFNPM	4	767.298	8.74146	0.003044	100	0.767646	0.008468	19.1912	0.2117
BI8622	4072	4077	EMFNPM	4	767.298	8.75059	0.001872	1000	0.813364	0.019316	20.3341	0.4829
BI8622	4072	4077	EMFNPM	4	767.298	8.74318	0.003797	10000	1.16884	0.011552	29.2209	0.2888
BI8626	4072	4077	EMFNPM	4	767.298	8.75876	0.008194	0	0	0	0	0
BI8626	4072	4077	EMFNPM	4	767.298	8.75197	0.005556	10	0.806624	0.006763	20.1656	0.169075
BI8626	4072	4077	EMFNPM	4	767.298	8.74979	0.004212	30	0.813377	0.011656	20.3344	0.2914
BI8626	4072	4077	EMFNPM	4	767.298	8.74287	0.004345	100	0.786485	0.010109	19.6621	0.252725
BI8626	4072	4077	EMFNPM	4	767.298	8.7493	0.002404	1000	0.824395	0.007791	20.6099	0.194775
BI8626	4072	4077	EMFNPM	4	767.298	8.73642	0.002264	10000	1.1392	0.005865	28.4801	0.146625
Apo	4072	4077	EMFNPM	4	767.298	8.75569	0.00141	0	0	0	0	0
Apo	4072	4077	EMFNPM	4	767.298	8.76397	0.012794	10	0.745122	0.017822	18.628	0.44555
Apo	4072	4077	EMFNPM	4	767.298	8.74899	0.005293	30	0.771842	0.012796	19.2961	0.3199
Apo	4072	4077	EMFNPM	4	767.298	8.74608	0.004871	100	0.743188	0.010314	18.5797	0.25785
Apo	4072	4077	EMFNPM	4	767.298	8.75188	0.004658	1000	0.783912	0.010142	19.5978	0.25355
Apo	4072	4077	EMFNPM	4	767.298	8.73301	0.004709	10000	1.09898	0.014567	27.4744	0.364175
BI8622	4072	4078	EMFNPMY	5	930.361	9.18033	0.004249	0	0	0	0	0
BI8622	4072	4078	EMFNPMY	5	930.361	9.16597	0.004242	10	0.870391	0.011835	17.4078	0.2367
BI8622	4072	4078	EMFNPMY	5	930.361	9.16339	0.002278	30	0.886199	0.012678	17.724	0.25356
BI8622	4072	4078	EMFNPMY	5	930.361	9.15379	0.002122	100	0.874932	0.011117	17.4986	0.22234
BI8622	4072	4078	EMFNPMY	5	930.361	9.16613	0.002116	1000	1.0852	0.018333	21.7041	0.36666
BI8622	4072	4078	EMFNPMY	5	930.361	9.16016	0.004468	10000	1.87267	0.008359	37.4534	0.16718
BI8626	4072	4078	EMFNPMY	5	930.361	9.17829	0.007147	0	0	0	0	0
BI8626	4072	4078	EMFNPMY	5	930.361	9.16881	0.006088	10	0.875036	0.015619	17.5007	0.31238
BI8626	4072	4078	EMFNPMY	5	930.361	9.16441	0.002537	30	0.854906	0.010601	17.0981	0.21202
BI8626	4072	4078	EMFNPMY	5	930.361	9.15967	0.004248	100	0.869437	0.009173	17.3887	0.18346
BI8626	4072	4078	EMFNPMY	5	930.361	9.1663	0.002732	1000	1.05733	0.013175	21.1466	0.2635
BI8626	4072	4078	EMFNPMY	5	930.361	9.14985	0.000724	10000	1.82638	0.011806	36.5275	0.23612
Apo	4072	4078	EMFNPMY	5	930.361	9.177	0.002805	0	0	0	0	0
Apo	4072	4078	EMFNPMY	5	930.361	9.17952	0.014262	10	0.832097	0.02438	16.6419	0.4876
Apo	4072	4078	EMFNPMY	5	930.361	9.16485	0.006604	30	0.829957	0.024168	16.5991	0.48336
Apo	4072	4078	EMFNPMY	5	930.361	9.15999	0.006635	100	0.828434	0.023005	16.5687	0.4601
Apo	4072	4078	EMFNPMY	5	930.361	9.16757	0.005254	1000	1.03145	0.022026	20.6291	0.44052
Apo	4072	4078	EMFNPMY	5	930.361	9.1463	0.008503	10000	1.79321	0.021099	35.8643	0.42198
BI8622	4073	4078	MFNPMY	4	801.318	8.92711	0.001061	0	0	0	0	0
BI8622	4073	4078	MFNPMY	4	801.318	8.97912	0.003557	10	0.7975	0.017812	19.9375	0.4453
BI8622	4073	4078	MFNPMY	4	801.318	8.98219	0.011968	30	0.824482	0.008142	20.612	0.20355
BI8622	4073	4078	MFNPMY	4	801.318	8.96371	0.004298	100	0.801751	0.009004	20.0438	0.2251
BI8622	4073	4078	MFNPMY	4	801.318	8.96635	0.009095	1000	0.970507	0.019213	24.2627	0.480325
BI8622	4073	4078	MFNPMY	4	801.318	8.97321	0.004664	10000	1.76737	0.008598	44.1843	0.21495
BI8626	4073	4078	MFNPMY	4	801.318	8.94297	0.006743	0	0	0	0	0
BI8626	4073	4078	MFNPMY	4	801.318	8.97716	0.001034	10	0.79823	0.034048	19.9557	0.8512
BI8626	4073	4078	MFNPMY	4	801.318	8.98187	0.004283	30	0.785614	0.037031	19.6404	0.925775
BI8626	4073	4078	MFNPMY	4	801.318	8.97759	0.008361	100	0.782678	0.027136	19.5669	0.6784
BI8626	4073	4078	MFNPMY	4	801.318	8.96326	0.002446	1000	0.965261	0.028124	24.1315	0.7031
BI8626	4073	4078	MFNPMY	4	801.318	8.9785	0.002713	10000	1.74566	0.026891	43.6415	0.672275
Apo	4073	4078	MFNPMY	4	801.318	8.92572	0.006105	0	0	0	0	0
Apo	4073	4078	MFNPMY	4	801.318	8.97436	0.010378	10	0.807424	0.030415	20.1856	0.760375
Apo	4073	4078	MFNPMY	4	801.318	8.98469	0.007576	30	0.80882	0.028165	20.2205	0.704125
Apo	4073	4078	MFNPMY	4	801.318	8.97611	0.01095	100	0.768941	0.032382	19.2235	0.80955
Apo	4073	4078	MFNPMY	4	801.318	8.97423	0.001533	1000	0.964651	0.035796	24.1163	0.8949
Apo	4073	4078	MFNPMY	4	801.318	8.96213	0.008639	10000	1.72219	0.039387	43.0548	0.984675
BI8622	4073	4080	MFNPMYAL	6	985.44	10.1297	0.063638	0	0	0	0	0
BI8622	4073	4080	MFNPMYAL	6	985.44	10.1039	0.010572	10	1.02142	0.040674	17.0236	0.6779
BI8622	4073	4080	MFNPMYAL	6	985.44	10.1092	0.007748	30	1.16125	0.041609	19.3542	0.693483
BI8622	4073	4080	MFNPMYAL	6	985.44	10.1135	0.037779	100	1.44258	0.039109	24.0429	0.651817
BI8622	4073	4080	MFNPMYAL	6	985.44	10.0892	0.010287	1000	1.88313	0.047634	31.3855	0.7939
BI8622	4073	4080	MFNPMYAL	6	985.44	10.0931	0.00438	10000	2.79725	0.040654	46.6209	0.677567
BI8626	4073	4080	MFNPMYAL	6	985.44	10.104	0.070138	0	0	0	0	0
BI8626	4073	4080	MFNPMYAL	6	985.44	10.0997	0.045016	10	1.09627	0.126621	18.2712	2.11035
BI8626	4073	4080	MFNPMYAL	6	985.44	10.1197	0.020576	30	1.17857	0.042801	19.6428	0.71335
BI8626	4073	4080	MFNPMYAL	6	985.44	10.0977	0.00764	100	1.46828	0.036012	24.4713	0.6002
BI8626	4073	4080	MFNPMYAL	6	985.44	10.0752	0.014557	1000	1.89576	0.036104	31.5959	0.601733
BI8626	4073	4080	MFNPMYAL	6	985.44	10.0969	0.006978	10000	2.80375	0.0383	46.7292	0.638333
Apo	4073	4080	MFNPMYAL	6	985.44	10.0432	0.010909	0	0	0	0	0
Apo	4073	4080	MFNPMYAL	6	985.44	10.1245	0.036791	10	1.04658	0.040868	17.4431	0.681133
Apo	4073	4080	MFNPMYAL	6	985.44	10.0884	0.016309	30	1.21457	0.041471	20.2428	0.691183
Apo	4073	4080	MFNPMYAL	6	985.44	10.0808	0.031032	100	1.49544	0.041276	24.9239	0.687933
Apo	4073	4080	MFNPMYAL	6	985.44	10.0675	0.010254	1000	1.91787	0.047002	31.9645	0.783367
Apo	4073	4080	MFNPMYAL	6	985.44	10.0694	0.010272	10000	2.8101	0.043215	46.835	0.72025
BI8622	4074	4080	FNPMYAL	5	854.399	9.62368	0.004199	0	0	0	0	0
BI8622	4074	4080	FNPMYAL	5	854.399	9.6111	0.004622	10	1.16088	0.009168	23.2176	0.18336
BI8622	4074	4080	FNPMYAL	5	854.399	9.6112	0.002972	30	1.30122	0.010237	26.0244	0.20474
BI8622	4074	4080	FNPMYAL	5	854.399	9.59755	0.00186	100	1.60382	0.007198	32.0764	0.14396
BI8622	4074	4080	FNPMYAL	5	854.399	9.61017	0.003536	1000	1.8746	0.029814	37.492	0.59628
BI8622	4074	4080	FNPMYAL	5	854.399	9.60485	0.005572	10000	2.39157	0.012941	47.8314	0.25882
BI8626	4074	4080	FNPMYAL	5	854.399	9.6205	0.005553	0	0	0	0	0
BI8626	4074	4080	FNPMYAL	5	854.399	9.61591	0.005634	10	1.16284	0.014304	23.2568	0.28608
BI8626	4074	4080	FNPMYAL	5	854.399	9.60979	0.003184	30	1.32328	0.020916	26.4657	0.41832
BI8626	4074	4080	FNPMYAL	5	854.399	9.60712	0.004991	100	1.59342	0.011429	31.8685	0.22858
BI8626	4074	4080	FNPMYAL	5	854.399	9.60931	0.002876	1000	1.87596	0.019668	37.5192	0.39336
BI8626	4074	4080	FNPMYAL	5	854.399	9.59596	0.001467	10000	2.38484	0.01597	47.6967	0.3194
Apo	4074	4080	FNPMYAL	5	854.399	9.62119	0.001192	0	0	0	0	0
Apo	4074	4080	FNPMYAL	5	854.399	9.62516	0.014976	10	1.1421	0.014675	22.8421	0.2935
Apo	4074	4080	FNPMYAL	5	854.399	9.61324	0.008363	30	1.28213	0.016426	25.6427	0.32852
Apo	4074	4080	FNPMYAL	5	854.399	9.60411	0.006226	100	1.56001	0.021456	31.2002	0.42912
Apo	4074	4080	FNPMYAL	5	854.399	9.61412	0.005394	1000	1.87891	0.019357	37.5782	0.38714
Apo	4074	4080	FNPMYAL	5	854.399	9.5951	0.007737	10000	2.37769	0.014303	47.5539	0.28606
BI8622	4075	4080	NPMYAL	4	707.331	8.67239	0.003634	0	0	0	0	0
BI8622	4075	4080	NPMYAL	4	707.331	8.67613	0.006468	10	0.914172	0.027292	22.8543	0.6823
BI8622	4075	4080	NPMYAL	4	707.331	8.68091	0.002364	30	1.0826	0.011903	27.065	0.297575
BI8622	4075	4080	NPMYAL	4	707.331	8.66329	0.006944	100	1.35186	0.044869	33.7965	1.12173
BI8622	4075	4080	NPMYAL	4	707.331	8.66623	0.004687	1000	1.63345	0.030449	40.8361	0.761225
BI8622	4075	4080	NPMYAL	4	707.331	8.66525	0.007598	10000	2.18609	0.021095	54.6521	0.527375
BI8626	4075	4080	NPMYAL	4	707.331	8.67244	0.007714	0	0	0	0	0
BI8626	4075	4080	NPMYAL	4	707.331	8.68198	0.007879	10	0.885595	0.009509	22.1399	0.237725
BI8626	4075	4080	NPMYAL	4	707.331	8.66791	0.002201	30	1.09608	0.017645	27.4021	0.441125
BI8626	4075	4080	NPMYAL	4	707.331	8.668	0.009925	100	1.31823	0.008676	32.9558	0.2169
BI8626	4075	4080	NPMYAL	4	707.331	8.67563	0.009444	1000	1.66571	0.025876	41.6428	0.6469
BI8626	4075	4080	NPMYAL	4	707.331	8.65439	0.003839	10000	2.17382	0.011794	54.3455	0.29485
Apo	4075	4080	NPMYAL	4	707.331	8.66881	0.001065	0	0	0	0	0
Apo	4075	4080	NPMYAL	4	707.331	8.69386	0.018444	10	0.93332	0.012853	23.333	0.321325
Apo	4075	4080	NPMYAL	4	707.331	8.67399	0.017278	30	1.08631	0.020991	27.1578	0.524775
Apo	4075	4080	NPMYAL	4	707.331	8.6736	0.011163	100	1.32963	0.013518	33.2407	0.33795
Apo	4075	4080	NPMYAL	4	707.331	8.67583	0.005997	1000	1.6756	0.025679	41.8901	0.641975
Apo	4075	4080	NPMYAL	4	707.331	8.65098	0.006102	10000	2.16807	0.031203	54.2018	0.780075
BI8622	4081	4088	FRTSPGDR	6	934.462	4.90991	0.003188	0	0	0	0	0
BI8622	4081	4088	FRTSPGDR	6	934.462	4.87947	0.003076	10	2.26712	0.032971	37.7854	0.549517
BI8622	4081	4088	FRTSPGDR	6	934.462	4.87962	0.003788	30	2.38233	0.020302	39.7055	0.338367
BI8622	4081	4088	FRTSPGDR	6	934.462	4.86863	0.004658	100	2.41783	0.016151	40.2971	0.269183
BI8622	4081	4088	FRTSPGDR	6	934.462	4.88357	0.005675	1000	2.34162	0.022662	39.027	0.3777
BI8622	4081	4088	FRTSPGDR	6	934.462	4.8781	0.004222	10000	2.41924	0.019013	40.3207	0.316883
BI8626	4081	4088	FRTSPGDR	6	934.462	4.91294	0.008643	0	0	0	0	0
BI8626	4081	4088	FRTSPGDR	6	934.462	4.88327	0.004655	10	2.25969	0.028675	37.6615	0.477917
BI8626	4081	4088	FRTSPGDR	6	934.462	4.88697	0.001764	30	2.46516	0.014689	41.086	0.244817
BI8626	4081	4088	FRTSPGDR	6	934.462	4.87838	0.008164	100	2.45026	0.023468	40.8377	0.391133
BI8626	4081	4088	FRTSPGDR	6	934.462	4.89013	0.002496	1000	2.42258	0.015677	40.3763	0.261283
BI8626	4081	4088	FRTSPGDR	6	934.462	4.86795	0.003334	10000	2.44695	0.014975	40.7825	0.249583
Apo	4081	4088	FRTSPGDR	6	934.462	4.90857	0.001574	0	0	0	0	0
Apo	4081	4088	FRTSPGDR	6	934.462	4.91176	0.025503	10	2.2179	0.028319	36.965	0.471983
Apo	4081	4088	FRTSPGDR	6	934.462	4.8815	0.007378	30	2.36526	0.039016	39.4211	0.650267
Apo	4081	4088	FRTSPGDR	6	934.462	4.88109	0.008209	100	2.4264	0.026965	40.44	0.449417
Apo	4081	4088	FRTSPGDR	6	934.462	4.88576	0.004949	1000	2.33501	0.036206	38.9168	0.603433
Apo	4081	4088	FRTSPGDR	6	934.462	4.86312	0.000711	10000	2.41577	0.026745	40.2628	0.44575
BI8622	4081	4090	FRTSPGDRVT	8	1134.58	5.43363	0.00234	0	0	0	0	0
BI8622	4081	4090	FRTSPGDRVT	8	1134.58	5.41525	0.002711	10	3.28595	0.033242	41.0744	0.415525
BI8622	4081	4090	FRTSPGDRVT	8	1134.58	5.42023	0.001932	30	3.40903	0.011932	42.6128	0.14915
BI8622	4081	4090	FRTSPGDRVT	8	1134.58	5.40896	0.002405	100	3.59286	0.013975	44.9108	0.174687
BI8622	4081	4090	FRTSPGDRVT	8	1134.58	5.41819	0.002866	1000	3.93523	0.042367	49.1904	0.529587
BI8622	4081	4090	FRTSPGDRVT	8	1134.58	5.41639	0.000328	10000	4.04047	0.029145	50.5059	0.364312
BI8626	4081	4090	FRTSPGDRVT	8	1134.58	5.43719	0.007967	0	0	0	0	0
BI8626	4081	4090	FRTSPGDRVT	8	1134.58	5.41988	0.004265	10	3.25923	0.028285	40.7404	0.353563
BI8626	4081	4090	FRTSPGDRVT	8	1134.58	5.41976	0.002424	30	3.53876	0.01987	44.2345	0.248375
BI8626	4081	4090	FRTSPGDRVT	8	1134.58	5.41446	0.003908	100	3.58795	0.036168	44.8494	0.4521
BI8626	4081	4090	FRTSPGDRVT	8	1134.58	5.42063	0.002993	1000	4.01548	0.033675	50.1934	0.420937
BI8626	4081	4090	FRTSPGDRVT	8	1134.58	5.40823	0.001587	10000	4.03667	0.012592	50.4584	0.1574
Apo	4081	4090	FRTSPGDRVT	8	1134.58	5.43257	0.001178	0	0	0	0	0
Apo	4081	4090	FRTSPGDRVT	8	1134.58	5.44094	0.018312	10	3.27208	0.002816	40.901	0.0352
Apo	4081	4090	FRTSPGDRVT	8	1134.58	5.41803	0.006676	30	3.43329	0.039819	42.9161	0.497737
Apo	4081	4090	FRTSPGDRVT	8	1134.58	5.41665	0.006769	100	3.59528	0.009527	44.941	0.119088
Apo	4081	4090	FRTSPGDRVT	8	1134.58	5.41995	0.003597	1000	4.00332	0.024469	50.0415	0.305863
Apo	4081	4090	FRTSPGDRVT	8	1134.58	5.40238	0.001525	10000	4.02137	0.010932	50.2672	0.13665
BI8622	4081	4091	FRTSPGDRVTY	9	1297.64	6.2891	0.002387	0	0	0	0	0
BI8622	4081	4091	FRTSPGDRVTY	9	1297.64	6.32724	0.003672	10	3.00906	0.091088	33.434	1.01209
BI8622	4081	4091	FRTSPGDRVTY	9	1297.64	6.33267	0.010805	30	3.18992	0.067354	35.4436	0.748378
BI8622	4081	4091	FRTSPGDRVTY	9	1297.64	6.3162	0.005841	100	3.37286	0.060832	37.4762	0.675911
BI8622	4081	4091	FRTSPGDRVTY	9	1297.64	6.31609	0.008857	1000	3.95029	0.031897	43.8921	0.354411
BI8622	4081	4091	FRTSPGDRVTY	9	1297.64	6.32019	0.002729	10000	4.39051	0.044489	48.7835	0.494322
BI8626	4081	4091	FRTSPGDRVTY	9	1297.64	6.29727	0.003963	0	0	0	0	0
BI8626	4081	4091	FRTSPGDRVTY	9	1297.64	6.32629	0.007916	10	3.0175	0.052481	33.5278	0.583122
BI8626	4081	4091	FRTSPGDRVTY	9	1297.64	6.33171	0.008655	30	3.18459	0.049643	35.3843	0.551589
BI8626	4081	4091	FRTSPGDRVTY	9	1297.64	6.32756	0.008471	100	3.35362	0.040473	37.2624	0.4497
BI8626	4081	4091	FRTSPGDRVTY	9	1297.64	6.31198	0.005896	1000	3.91767	0.048172	43.5297	0.535244
BI8626	4081	4091	FRTSPGDRVTY	9	1297.64	6.32446	0.002753	10000	4.43361	0.020578	49.2624	0.228644
Apo	4081	4091	FRTSPGDRVTY	9	1297.64	6.28664	0.001196	0	0	0	0	0
Apo	4081	4091	FRTSPGDRVTY	9	1297.64	6.32653	0.010449	10	3.09157	0.087837	34.3508	0.975967
Apo	4081	4091	FRTSPGDRVTY	9	1297.64	6.33102	0.004671	30	3.1615	0.083574	35.1278	0.9286
Apo	4081	4091	FRTSPGDRVTY	9	1297.64	6.32784	0.008712	100	3.38387	0.054208	37.5986	0.602311
Apo	4081	4091	FRTSPGDRVTY	9	1297.64	6.31916	0.001885	1000	3.95951	0.037071	43.9946	0.4119
Apo	4081	4091	FRTSPGDRVTY	9	1297.64	6.30667	0.008805	10000	4.38739	0.040122	48.7488	0.4458
BI8622	4081	4106	FRTSPGDRVTYTINPSSHCNPNHLSY	22	2962.38	6.89059	0.001676	0	0	0	0	0
BI8622	4081	4106	FRTSPGDRVTYTINPSSHCNPNHLSY	22	2962.38	6.8639	0.009412	10	6.31424	0.203505	28.7011	0.925023
BI8622	4081	4106	FRTSPGDRVTYTINPSSHCNPNHLSY	22	2962.38	6.86434	0.001847	30	6.62809	0.060768	30.1277	0.276218
BI8622	4081	4106	FRTSPGDRVTYTINPSSHCNPNHLSY	22	2962.38	6.8521	0.003679	100	7.11859	0.196222	32.3572	0.891918
BI8622	4081	4106	FRTSPGDRVTYTINPSSHCNPNHLSY	22	2962.38	6.87887	0.005597	1000	8.10074	0.209867	36.8215	0.953941
BI8622	4081	4106	FRTSPGDRVTYTINPSSHCNPNHLSY	22	2962.38	6.85851	0.001526	10000	9.43963	0.025182	42.9074	0.114464
BI8626	4081	4106	FRTSPGDRVTYTINPSSHCNPNHLSY	22	2962.38	6.89471	0.008434	0	0	0	0	0
BI8626	4081	4106	FRTSPGDRVTYTINPSSHCNPNHLSY	22	2962.38	6.86495	0.005484	10	6.15317	0.022745	27.969	0.103386
BI8626	4081	4106	FRTSPGDRVTYTINPSSHCNPNHLSY	22	2962.38	6.87381	0.004583	30	6.67009	0.092339	30.3186	0.419723
BI8626	4081	4106	FRTSPGDRVTYTINPSSHCNPNHLSY	22	2962.38	6.85232	0.005351	100	6.9568	0.033366	31.6218	0.151664
BI8626	4081	4106	FRTSPGDRVTYTINPSSHCNPNHLSY	22	2962.38	6.87875	0.0055	1000	8.07189	0.045618	36.6904	0.207355
BI8626	4081	4106	FRTSPGDRVTYTINPSSHCNPNHLSY	22	2962.38	6.85316	0.002826	10000	9.37286	0.037459	42.6039	0.170268
Apo	4081	4106	FRTSPGDRVTYTINPSSHCNPNHLSY	22	2962.38	6.8947	0.002653	0	0	0	0	0
Apo	4081	4106	FRTSPGDRVTYTINPSSHCNPNHLSY	22	2962.38	6.88237	0.017761	10	6.10849	0.082876	27.7659	0.376709
Apo	4081	4106	FRTSPGDRVTYTINPSSHCNPNHLSY	22	2962.38	6.87154	0.00444	30	6.75256	0.15422	30.6935	0.701
Apo	4081	4106	FRTSPGDRVTYTINPSSHCNPNHLSY	22	2962.38	6.86084	0.008778	100	7.05628	0.04877	32.074	0.221682
Apo	4081	4106	FRTSPGDRVTYTINPSSHCNPNHLSY	22	2962.38	6.87669	0.00368	1000	8.12561	0.119551	36.9346	0.543414
Apo	4081	4106	FRTSPGDRVTYTINPSSHCNPNHLSY	22	2962.38	6.84592	0.006247	10000	9.39808	0.167295	42.7186	0.760432
BI8622	4081	4107	FRTSPGDRVTYTINPSSHCNPNHLSYF	23	3109.45	7.51835	0.006031	0	0	0	0	0
BI8622	4081	4107	FRTSPGDRVTYTINPSSHCNPNHLSYF	23	3109.45	7.54865	0.004811	10	5.31436	0.179386	23.1059	0.779939
BI8622	4081	4107	FRTSPGDRVTYTINPSSHCNPNHLSYF	23	3109.45	7.54854	0.009994	30	5.52973	0.189532	24.0423	0.824052
BI8622	4081	4107	FRTSPGDRVTYTINPSSHCNPNHLSYF	23	3109.45	7.537	0.00206	100	6.34061	0.150788	27.5679	0.6556
BI8622	4081	4107	FRTSPGDRVTYTINPSSHCNPNHLSYF	23	3109.45	7.53463	0.007828	1000	7.25796	0.113003	31.5564	0.491317
BI8622	4081	4107	FRTSPGDRVTYTINPSSHCNPNHLSYF	23	3109.45	7.53841	0.00751	10000	8.4668	0.1141	36.8122	0.496087
BI8626	4081	4107	FRTSPGDRVTYTINPSSHCNPNHLSYF	23	3109.45	7.52246	0.001285	0	0	0	0	0
BI8626	4081	4107	FRTSPGDRVTYTINPSSHCNPNHLSYF	23	3109.45	7.54409	0.008798	10	5.36031	0.263673	23.3057	1.1464
BI8626	4081	4107	FRTSPGDRVTYTINPSSHCNPNHLSYF	23	3109.45	7.54961	0.011225	30	5.68803	0.232279	24.7306	1.00991
BI8626	4081	4107	FRTSPGDRVTYTINPSSHCNPNHLSYF	23	3109.45	7.54605	0.006688	100	6.22395	0.180015	27.0607	0.782674
BI8626	4081	4107	FRTSPGDRVTYTINPSSHCNPNHLSYF	23	3109.45	7.52468	0.00505	1000	7.24642	0.111416	31.5062	0.484417
BI8626	4081	4107	FRTSPGDRVTYTINPSSHCNPNHLSYF	23	3109.45	7.53512	0.004488	10000	8.51761	0.017384	37.0331	0.0755826
Apo	4081	4107	FRTSPGDRVTYTINPSSHCNPNHLSYF	23	3109.45	7.51449	0.007818	0	0	0	0	0
Apo	4081	4107	FRTSPGDRVTYTINPSSHCNPNHLSYF	23	3109.45	7.54295	0.009092	10	5.29768	0.205778	23.0334	0.894687
Apo	4081	4107	FRTSPGDRVTYTINPSSHCNPNHLSYF	23	3109.45	7.55455	0.002979	30	5.97085	0.106506	25.9602	0.46307
Apo	4081	4107	FRTSPGDRVTYTINPSSHCNPNHLSYF	23	3109.45	7.54535	0.005368	100	6.24428	0.13029	27.149	0.566478
Apo	4081	4107	FRTSPGDRVTYTINPSSHCNPNHLSYF	23	3109.45	7.54441	0.002858	1000	7.36408	0.142808	32.0177	0.620904
Apo	4081	4107	FRTSPGDRVTYTINPSSHCNPNHLSYF	23	3109.45	7.52773	0.012753	10000	8.41627	0.165059	36.5925	0.717648
BI8622	4082	4091	RTSPGDRVTY	8	1150.57	5.71661	0.007096	0	0	0	0	0
BI8622	4082	4091	RTSPGDRVTY	8	1150.57	5.74918	0.00388	10	2.77926	0.047759	34.7407	0.596988
BI8622	4082	4091	RTSPGDRVTY	8	1150.57	5.76113	0.009684	30	2.93016	0.032558	36.627	0.406975
BI8622	4082	4091	RTSPGDRVTY	8	1150.57	5.74372	0.002417	100	2.99893	0.025487	37.4866	0.318587
BI8622	4082	4091	RTSPGDRVTY	8	1150.57	5.74129	0.00704	1000	3.57456	0.060183	44.682	0.752287
BI8622	4082	4091	RTSPGDRVTY	8	1150.57	5.7481	0.002566	10000	3.9319	0.04579	49.1487	0.572375
BI8626	4082	4091	RTSPGDRVTY	8	1150.57	5.72639	0.00758	0	0	0	0	0
BI8626	4082	4091	RTSPGDRVTY	8	1150.57	5.75023	0.008052	10	2.70696	0.066147	33.8371	0.826838
BI8626	4082	4091	RTSPGDRVTY	8	1150.57	5.75763	0.005069	30	2.83153	0.063335	35.3941	0.791687
BI8626	4082	4091	RTSPGDRVTY	8	1150.57	5.75101	0.004461	100	2.9329	0.058546	36.6613	0.731825
BI8626	4082	4091	RTSPGDRVTY	8	1150.57	5.73775	0.006086	1000	3.41408	0.067787	42.676	0.847337
BI8626	4082	4091	RTSPGDRVTY	8	1150.57	5.75257	0.003264	10000	3.94544	0.05206	49.318	0.65075
Apo	4082	4091	RTSPGDRVTY	8	1150.57	5.71883	0.002695	0	0	0	0	0
Apo	4082	4091	RTSPGDRVTY	8	1150.57	5.74883	0.006091	10	2.82997	0.065776	35.3746	0.8222
Apo	4082	4091	RTSPGDRVTY	8	1150.57	5.75492	0.005797	30	2.88359	0.029651	36.0449	0.370638
Apo	4082	4091	RTSPGDRVTY	8	1150.57	5.75122	0.008044	100	2.99657	0.053415	37.4571	0.667687
Apo	4082	4091	RTSPGDRVTY	8	1150.57	5.74679	0.001523	1000	3.53662	0.082049	44.2077	1.02561
Apo	4082	4091	RTSPGDRVTY	8	1150.57	5.73382	0.010633	10000	3.97193	0.033408	49.6492	0.4176
BI8622	4082	4106	RTSPGDRVTYTINPSSHCNPNHLSY	21	2815.31	6.70733	0.002795	0	0	0	0	0
BI8622	4082	4106	RTSPGDRVTYTINPSSHCNPNHLSY	21	2815.31	6.72721	0.003064	10	5.47944	0.034777	26.0926	0.165605
BI8622	4082	4106	RTSPGDRVTYTINPSSHCNPNHLSY	21	2815.31	6.73128	0.007514	30	5.78504	0.151606	27.5478	0.721933
BI8622	4082	4106	RTSPGDRVTYTINPSSHCNPNHLSY	21	2815.31	6.72643	0.003497	100	6.33132	0.099126	30.1491	0.472029
BI8622	4082	4106	RTSPGDRVTYTINPSSHCNPNHLSY	21	2815.31	6.71877	0.007213	1000	7.42979	0.108359	35.3799	0.515995
BI8622	4082	4106	RTSPGDRVTYTINPSSHCNPNHLSY	21	2815.31	6.72276	0.002922	10000	8.59383	0.020307	40.923	0.0967
BI8626	4082	4106	RTSPGDRVTYTINPSSHCNPNHLSY	21	2815.31	6.7075	0.002523	0	0	0	0	0
BI8626	4082	4106	RTSPGDRVTYTINPSSHCNPNHLSY	21	2815.31	6.72672	0.006293	10	5.52466	0.171053	26.3079	0.814538
BI8626	4082	4106	RTSPGDRVTYTINPSSHCNPNHLSY	21	2815.31	6.73144	0.006413	30	5.90326	0.190445	28.1108	0.906881
BI8626	4082	4106	RTSPGDRVTYTINPSSHCNPNHLSY	21	2815.31	6.72805	0.004533	100	6.31608	0.152123	30.0766	0.724395
BI8626	4082	4106	RTSPGDRVTYTINPSSHCNPNHLSY	21	2815.31	6.71467	0.003137	1000	7.46657	0.028421	35.5551	0.135338
BI8626	4082	4106	RTSPGDRVTYTINPSSHCNPNHLSY	21	2815.31	6.72907	0.00212	10000	8.64676	0.014521	41.1751	0.0691476
Apo	4082	4106	RTSPGDRVTYTINPSSHCNPNHLSY	21	2815.31	6.70445	0.001358	0	0	0	0	0
Apo	4082	4106	RTSPGDRVTYTINPSSHCNPNHLSY	21	2815.31	6.72454	0.002617	10	5.55271	0.171595	26.4415	0.817119
Apo	4082	4106	RTSPGDRVTYTINPSSHCNPNHLSY	21	2815.31	6.73284	0.002579	30	5.9269	0.079183	28.2233	0.377062
Apo	4082	4106	RTSPGDRVTYTINPSSHCNPNHLSY	21	2815.31	6.72729	0.005639	100	6.29791	0.123533	29.9901	0.588252
Apo	4082	4106	RTSPGDRVTYTINPSSHCNPNHLSY	21	2815.31	6.72555	0.001795	1000	7.46513	0.055482	35.5482	0.2642
Apo	4082	4106	RTSPGDRVTYTINPSSHCNPNHLSY	21	2815.31	6.71307	0.007774	10000	8.45057	0.097078	40.2408	0.462276
BI8622	4083	4092	TSPGDRVTYT	8	1095.52	5.37362	0.003138	0	0	0	0	0
BI8622	4083	4092	TSPGDRVTYT	8	1095.52	5.3575	0.009022	10	2.88234	0.025596	36.0293	0.31995
BI8622	4083	4092	TSPGDRVTYT	8	1095.52	5.36433	0.006237	30	3.18623	0.045277	39.8279	0.565962
BI8622	4083	4092	TSPGDRVTYT	8	1095.52	5.34834	0.004055	100	3.31396	0.068029	41.4245	0.850363
BI8622	4083	4092	TSPGDRVTYT	8	1095.52	5.37226	0.007499	1000	3.41218	0.028396	42.6523	0.35495
BI8622	4083	4092	TSPGDRVTYT	8	1095.52	5.3632	0.003158	10000	3.54948	0.127087	44.3685	1.58859
BI8626	4083	4092	TSPGDRVTYT	8	1095.52	5.37638	0.007235	0	0	0	0	0
BI8626	4083	4092	TSPGDRVTYT	8	1095.52	5.36323	0.008562	10	3.02044	0.036198	37.7555	0.452475
BI8626	4083	4092	TSPGDRVTYT	8	1095.52	5.37635	0.002188	30	3.28586	0.028706	41.0732	0.358825
BI8626	4083	4092	TSPGDRVTYT	8	1095.52	5.35476	0.006639	100	3.42535	0.063374	42.8168	0.792175
BI8626	4083	4092	TSPGDRVTYT	8	1095.52	5.37944	0.002762	1000	3.49842	0.06572	43.7302	0.8215
BI8626	4083	4092	TSPGDRVTYT	8	1095.52	5.34974	0.004634	10000	3.44625	0.013603	43.0781	0.170038
Apo	4083	4092	TSPGDRVTYT	8	1095.52	5.37177	0.002966	0	0	0	0	0
Apo	4083	4092	TSPGDRVTYT	8	1095.52	5.38667	0.024911	10	2.7967	0.041247	34.9587	0.515587
Apo	4083	4092	TSPGDRVTYT	8	1095.52	5.36303	0.008835	30	3.2385	0.055196	40.4813	0.68995
Apo	4083	4092	TSPGDRVTYT	8	1095.52	5.35684	0.010677	100	3.31084	0.036488	41.3856	0.4561
Apo	4083	4092	TSPGDRVTYT	8	1095.52	5.37363	0.006773	1000	3.43161	0.015456	42.8951	0.1932
Apo	4083	4092	TSPGDRVTYT	8	1095.52	5.33868	0.004609	10000	3.33574	0.008861	41.6968	0.110763
BI8622	4089	4094	VTYTIN	5	709.364	6.96215	0.006537	0	0	0	0	0
BI8622	4089	4094	VTYTIN	5	709.364	6.94126	0.00346	10	0.871921	0.009084	17.4384	0.18168
BI8622	4089	4094	VTYTIN	5	709.364	6.9422	0.003233	30	0.965353	0.011809	19.3071	0.23618
BI8622	4089	4094	VTYTIN	5	709.364	6.93109	0.00456	100	1.00415	0.007428	20.0831	0.14856
BI8622	4089	4094	VTYTIN	5	709.364	6.95409	0.007991	1000	1.2853	0.024361	25.706	0.48722
BI8622	4089	4094	VTYTIN	5	709.364	6.93933	0.000936	10000	2.72403	0.013285	54.4805	0.2657
BI8626	4089	4094	VTYTIN	5	709.364	6.96181	0.006822	0	0	0	0	0
BI8626	4089	4094	VTYTIN	5	709.364	6.94424	0.00692	10	0.862845	0.013727	17.2569	0.27454
BI8626	4089	4094	VTYTIN	5	709.364	6.94516	0.004649	30	0.978691	0.013847	19.5738	0.27694
BI8626	4089	4094	VTYTIN	5	709.364	6.93562	0.006562	100	1.00996	0.019369	20.1993	0.38738
BI8626	4089	4094	VTYTIN	5	709.364	6.95612	0.005292	1000	1.27516	0.011023	25.5032	0.22046
BI8626	4089	4094	VTYTIN	5	709.364	6.92845	0.002357	10000	2.65061	0.016349	53.0122	0.32698
Apo	4089	4094	VTYTIN	5	709.364	6.95953	0.003074	0	0	0	0	0
Apo	4089	4094	VTYTIN	5	709.364	6.96293	0.019002	10	0.86536	0.023948	17.3072	0.47896
Apo	4089	4094	VTYTIN	5	709.364	6.94114	0.008725	30	0.96837	0.018663	19.3674	0.37326
Apo	4089	4094	VTYTIN	5	709.364	6.9422	0.008419	100	1.008	0.012729	20.1599	0.25458
Apo	4089	4094	VTYTIN	5	709.364	6.94963	0.005368	1000	1.3005	0.010598	26.01	0.21196
Apo	4089	4094	VTYTIN	5	709.364	6.92427	0.002412	10000	2.66913	0.021474	53.3826	0.42948
BI8622	4089	4102	VTYTINPSSHCNPN	11	1545.69	6.5709	0.003559	0	0	0	0	0
BI8622	4089	4102	VTYTINPSSHCNPN	11	1545.69	6.53647	0.003105	10	2.75662	0.043127	25.0602	0.392064
BI8622	4089	4102	VTYTINPSSHCNPN	11	1545.69	6.53765	0.004695	30	2.8854	0.017169	26.2309	0.156082
BI8622	4089	4102	VTYTINPSSHCNPN	11	1545.69	6.52822	0.002271	100	2.8837	0.034345	26.2154	0.312227
BI8622	4089	4102	VTYTINPSSHCNPN	11	1545.69	6.54657	0.007061	1000	3.03414	0.050267	27.5831	0.456973
BI8622	4089	4102	VTYTINPSSHCNPN	11	1545.69	6.53673	0.002367	10000	4.10326	0.016625	37.3023	0.151136
BI8626	4089	4102	VTYTINPSSHCNPN	11	1545.69	6.56881	0.006224	0	0	0	0	0
BI8626	4089	4102	VTYTINPSSHCNPN	11	1545.69	6.53993	0.005327	10	2.74719	0.014628	24.9744	0.132982
BI8626	4089	4102	VTYTINPSSHCNPN	11	1545.69	6.53852	0.00433	30	2.94924	0.009828	26.8113	0.0893455
BI8626	4089	4102	VTYTINPSSHCNPN	11	1545.69	6.53179	0.006283	100	2.89979	0.01414	26.3617	0.128545
BI8626	4089	4102	VTYTINPSSHCNPN	11	1545.69	6.55021	0.002829	1000	3.07486	0.02191	27.9533	0.199182
BI8626	4089	4102	VTYTINPSSHCNPN	11	1545.69	6.53021	0.00246	10000	4.05887	0.042809	36.8988	0.389173
Apo	4089	4102	VTYTINPSSHCNPN	11	1545.69	6.5661	0.00173	0	0	0	0	0
Apo	4089	4102	VTYTINPSSHCNPN	11	1545.69	6.55873	0.01704	10	2.75456	0.031844	25.0414	0.289491
Apo	4089	4102	VTYTINPSSHCNPN	11	1545.69	6.53661	0.006565	30	2.9136	0.058216	26.4872	0.529236
Apo	4089	4102	VTYTINPSSHCNPN	11	1545.69	6.5354	0.009018	100	2.89295	0.033171	26.2995	0.301555
Apo	4089	4102	VTYTINPSSHCNPN	11	1545.69	6.5457	0.003134	1000	3.0841	0.030763	28.0372	0.279664
Apo	4089	4102	VTYTINPSSHCNPN	11	1545.69	6.52256	0.005906	10000	4.06737	0.029912	36.9761	0.271927
BI8622	4089	4106	VTYTINPSSHCNPNHLSY	15	2045.93	7.16664	0.003285	0	0	0	0	0
BI8622	4089	4106	VTYTINPSSHCNPNHLSY	15	2045.93	7.15267	0.00643	10	3.248	0.131554	21.6533	0.877027
BI8622	4089	4106	VTYTINPSSHCNPNHLSY	15	2045.93	7.15459	0.003415	30	3.53876	0.023525	23.5917	0.156833
BI8622	4089	4106	VTYTINPSSHCNPNHLSY	15	2045.93	7.14405	0.00144	100	3.83204	0.109751	25.5469	0.731673
BI8622	4089	4106	VTYTINPSSHCNPNHLSY	15	2045.93	7.16286	0.001629	1000	4.49805	0.06648	29.987	0.4432
BI8622	4089	4106	VTYTINPSSHCNPNHLSY	15	2045.93	7.1553	0.001546	10000	5.6295	0.015088	37.53	0.100587
BI8626	4089	4106	VTYTINPSSHCNPNHLSY	15	2045.93	7.16462	0.008745	0	0	0	0	0
BI8626	4089	4106	VTYTINPSSHCNPNHLSY	15	2045.93	7.14836	0.005398	10	3.18011	0.042083	21.2007	0.280553
BI8626	4089	4106	VTYTINPSSHCNPNHLSY	15	2045.93	7.15574	0.002619	30	3.54984	0.058601	23.6656	0.390673
BI8626	4089	4106	VTYTINPSSHCNPNHLSY	15	2045.93	7.14015	0.0054	100	3.86601	0.041136	25.7734	0.27424
BI8626	4089	4106	VTYTINPSSHCNPNHLSY	15	2045.93	7.15856	0.002051	1000	4.48922	0.028454	29.9281	0.189693
BI8626	4089	4106	VTYTINPSSHCNPNHLSY	15	2045.93	7.14514	0.002123	10000	5.63366	0.016803	37.5577	0.11202
Apo	4089	4106	VTYTINPSSHCNPNHLSY	15	2045.93	7.16301	0.004042	0	0	0	0	0
Apo	4089	4106	VTYTINPSSHCNPNHLSY	15	2045.93	7.16751	0.014901	10	3.13686	0.039276	20.9124	0.26184
Apo	4089	4106	VTYTINPSSHCNPNHLSY	15	2045.93	7.15792	0.004689	30	3.60352	0.069909	24.0235	0.46606
Apo	4089	4106	VTYTINPSSHCNPNHLSY	15	2045.93	7.15169	0.009011	100	3.89409	0.044812	25.9606	0.298747
Apo	4089	4106	VTYTINPSSHCNPNHLSY	15	2045.93	7.1629	0.004784	1000	4.52555	0.047211	30.1703	0.31474
Apo	4089	4106	VTYTINPSSHCNPNHLSY	15	2045.93	7.14379	0.006218	10000	5.63669	0.059222	37.578	0.394813
BI8622	4089	4108	VTYTINPSSHCNPNHLSYFK	17	2321.09	7.22898	0.001938	0	0	0	0	0
BI8622	4089	4108	VTYTINPSSHCNPNHLSYFK	17	2321.09	7.20913	0.006939	10	2.59938	0.14185	15.2905	0.834412
BI8622	4089	4108	VTYTINPSSHCNPNHLSYFK	17	2321.09	7.2119	0.003994	30	2.74927	0.065629	16.1722	0.386053
BI8622	4089	4108	VTYTINPSSHCNPNHLSYFK	17	2321.09	7.20305	0.000795	100	3.08089	0.121549	18.1229	0.714994
BI8622	4089	4108	VTYTINPSSHCNPNHLSYFK	17	2321.09	7.21831	0.003171	1000	3.69062	0.147396	21.7095	0.867035
BI8622	4089	4108	VTYTINPSSHCNPNHLSYFK	17	2321.09	7.21034	0.001183	10000	4.95081	0.023854	29.1224	0.140318
BI8626	4089	4108	VTYTINPSSHCNPNHLSYFK	17	2321.09	7.22627	0.008691	0	0	0	0	0
BI8626	4089	4108	VTYTINPSSHCNPNHLSYFK	17	2321.09	7.2055	0.005139	10	2.55658	0.035348	15.0387	0.207929
BI8626	4089	4108	VTYTINPSSHCNPNHLSYFK	17	2321.09	7.21306	0.002799	30	2.77491	0.017739	16.323	0.104347
BI8626	4089	4108	VTYTINPSSHCNPNHLSYFK	17	2321.09	7.20023	0.006628	100	2.97966	0.023731	17.5274	0.139594
BI8626	4089	4108	VTYTINPSSHCNPNHLSYFK	17	2321.09	7.21726	0.003115	1000	3.68131	0.02586	21.6547	0.152118
BI8626	4089	4108	VTYTINPSSHCNPNHLSYFK	17	2321.09	7.20053	0.003446	10000	4.9485	0.012139	29.1088	0.0714059
Apo	4089	4108	VTYTINPSSHCNPNHLSYFK	17	2321.09	7.22766	0.002337	0	0	0	0	0
Apo	4089	4108	VTYTINPSSHCNPNHLSYFK	17	2321.09	7.22479	0.014515	10	2.5733	0.056292	15.137	0.331129
Apo	4089	4108	VTYTINPSSHCNPNHLSYFK	17	2321.09	7.21372	0.004221	30	2.90865	0.108998	17.1097	0.641165
Apo	4089	4108	VTYTINPSSHCNPNHLSYFK	17	2321.09	7.21133	0.008119	100	3.05022	0.029832	17.9425	0.175482
Apo	4089	4108	VTYTINPSSHCNPNHLSYFK	17	2321.09	7.21797	0.004374	1000	3.76427	0.065512	22.1428	0.385365
Apo	4089	4108	VTYTINPSSHCNPNHLSYFK	17	2321.09	7.19896	0.00723	10000	4.98133	0.138039	29.3019	0.811994
BI8622	4091	4102	YTINPSSHCNPN	9	1345.57	6.16221	0.002998	0	0	0	0	0
BI8622	4091	4102	YTINPSSHCNPN	9	1345.57	6.13727	0.005528	10	2.7707	0.04123	30.7856	0.458111
BI8622	4091	4102	YTINPSSHCNPN	9	1345.57	6.13632	0.004886	30	3.00531	0.075985	33.3923	0.844278
BI8622	4091	4102	YTINPSSHCNPN	9	1345.57	6.12716	0.002462	100	2.96027	0.043518	32.8918	0.483533
BI8622	4091	4102	YTINPSSHCNPN	9	1345.57	6.14835	0.00548	1000	2.81225	0.021689	31.2473	0.240989
BI8622	4091	4102	YTINPSSHCNPN	9	1345.57	6.13539	0.003192	10000	2.93938	0.008014	32.6598	0.0890444
BI8626	4091	4102	YTINPSSHCNPN	9	1345.57	6.16604	0.008164	0	0	0	0	0
BI8626	4091	4102	YTINPSSHCNPN	9	1345.57	6.13877	0.004938	10	2.80635	0.079315	31.1817	0.881278
BI8626	4091	4102	YTINPSSHCNPN	9	1345.57	6.14414	0.002056	30	2.99596	0.037828	33.2884	0.420311
BI8626	4091	4102	YTINPSSHCNPN	9	1345.57	6.13212	0.005887	100	2.97803	0.032248	33.0892	0.358311
BI8626	4091	4102	YTINPSSHCNPN	9	1345.57	6.14776	0.00362	1000	2.91407	0.084952	32.3786	0.943911
BI8626	4091	4102	YTINPSSHCNPN	9	1345.57	6.12545	0.002654	10000	2.97396	0.080338	33.044	0.892644
Apo	4091	4102	YTINPSSHCNPN	9	1345.57	6.16287	0.00571	0	0	0	0	0
Apo	4091	4102	YTINPSSHCNPN	9	1345.57	6.15611	0.038009	10	2.77861	0.913443	30.8735	10.1494
Apo	4091	4102	YTINPSSHCNPN	9	1345.57	6.13912	0.004839	30	2.94643	0.055335	32.7381	0.614833
Apo	4091	4102	YTINPSSHCNPN	9	1345.57	6.13396	0.008742	100	2.99788	0.055765	33.3098	0.619611
Apo	4091	4102	YTINPSSHCNPN	9	1345.57	6.14372	0.004549	1000	2.90928	0.067394	32.3253	0.748822
Apo	4091	4102	YTINPSSHCNPN	9	1345.57	6.11975	0.005449	10000	2.96624	0.068857	32.9583	0.765078
BI8622	4091	4106	YTINPSSHCNPNHLSY	13	1845.81	6.92507	0.003688	0	0	0	0	0
BI8622	4091	4106	YTINPSSHCNPNHLSY	13	1845.81	6.90391	0.010455	10	3.11762	0.053704	23.9817	0.413108
BI8622	4091	4106	YTINPSSHCNPNHLSY	13	1845.81	6.90613	0.006367	30	3.4294	0.009439	26.38	0.0726077
BI8622	4091	4106	YTINPSSHCNPNHLSY	13	1845.81	6.89145	0.002088	100	3.69383	0.050821	28.414	0.390931
BI8622	4091	4106	YTINPSSHCNPNHLSY	13	1845.81	6.91706	0.006251	1000	4.11093	0.065752	31.6225	0.505785
BI8622	4091	4106	YTINPSSHCNPNHLSY	13	1845.81	6.90089	0.000328	10000	4.30623	0.007351	33.1248	0.0565462
BI8626	4091	4106	YTINPSSHCNPNHLSY	13	1845.81	6.92319	0.007291	0	0	0	0	0
BI8626	4091	4106	YTINPSSHCNPNHLSY	13	1845.81	6.90629	0.005182	10	3.19838	0.011533	24.6029	0.0887154
BI8626	4091	4106	YTINPSSHCNPNHLSY	13	1845.81	6.90641	0.00318	30	3.58165	0.020875	27.5512	0.160577
BI8626	4091	4106	YTINPSSHCNPNHLSY	13	1845.81	6.89049	0.003995	100	3.75319	0.007608	28.8707	0.0585231
BI8626	4091	4106	YTINPSSHCNPNHLSY	13	1845.81	6.91753	0.005718	1000	4.2353	0.016068	32.5793	0.1236
BI8626	4091	4106	YTINPSSHCNPNHLSY	13	1845.81	6.90736	0.008464	10000	4.43755	0.036911	34.135	0.283931
Apo	4091	4106	YTINPSSHCNPNHLSY	13	1845.81	6.92452	0.001562	0	0	0	0	0
Apo	4091	4106	YTINPSSHCNPNHLSY	13	1845.81	6.93249	0.023335	10	3.0927	0.05327	23.79	0.409769
Apo	4091	4106	YTINPSSHCNPNHLSY	13	1845.81	6.90728	0.004372	30	3.56171	0.07368	27.3978	0.566769
Apo	4091	4106	YTINPSSHCNPNHLSY	13	1845.81	6.89904	0.007797	100	3.71654	0.051339	28.5888	0.394915
Apo	4091	4106	YTINPSSHCNPNHLSY	13	1845.81	6.91369	0.004428	1000	4.20459	0.05632	32.343	0.433231
Apo	4091	4106	YTINPSSHCNPNHLSY	13	1845.81	6.88896	0.006476	10000	4.39925	0.070712	33.8404	0.543938
BI8622	4091	4107	YTINPSSHCNPNHLSYF	14	1992.88	7.91584	0.001501	0	0	0	0	0
BI8622	4091	4107	YTINPSSHCNPNHLSYF	14	1992.88	7.8972	0.006046	10	2.95976	0.127966	21.1412	0.914043
BI8622	4091	4107	YTINPSSHCNPNHLSYF	14	1992.88	7.90121	0.003307	30	3.12747	0.065326	22.339	0.466614
BI8622	4091	4107	YTINPSSHCNPNHLSYF	14	1992.88	7.89244	0.001583	100	3.4525	0.144522	24.6607	1.0323
BI8622	4091	4107	YTINPSSHCNPNHLSYF	14	1992.88	7.90395	0.002639	1000	3.80962	0.136927	27.2116	0.97805
BI8622	4091	4107	YTINPSSHCNPNHLSYF	14	1992.88	7.89944	0.003126	10000	4.03328	0.041993	28.8091	0.29995
BI8626	4091	4107	YTINPSSHCNPNHLSYF	14	1992.88	7.91894	0.008761	0	0	0	0	0
BI8626	4091	4107	YTINPSSHCNPNHLSYF	14	1992.88	7.90717	0.005759	10	2.84658	0.028477	20.3327	0.203407
BI8626	4091	4107	YTINPSSHCNPNHLSYF	14	1992.88	7.90553	0.003658	30	3.19408	0.040685	22.8148	0.290607
BI8626	4091	4107	YTINPSSHCNPNHLSYF	14	1992.88	7.89844	0.003748	100	3.33168	0.05001	23.7977	0.357214
BI8626	4091	4107	YTINPSSHCNPNHLSYF	14	1992.88	7.90864	0.00273	1000	3.77185	0.041427	26.9418	0.295907
BI8626	4091	4107	YTINPSSHCNPNHLSYF	14	1992.88	7.89172	0.002347	10000	4.02451	0.053721	28.7465	0.383721
Apo	4091	4107	YTINPSSHCNPNHLSYF	14	1992.88	7.91612	0.001372	0	0	0	0	0
Apo	4091	4107	YTINPSSHCNPNHLSYF	14	1992.88	7.91701	0.011616	10	2.8564	0.061976	20.4029	0.442686
Apo	4091	4107	YTINPSSHCNPNHLSYF	14	1992.88	7.90268	0.004251	30	3.22252	0.091123	23.018	0.650879
Apo	4091	4107	YTINPSSHCNPNHLSYF	14	1992.88	7.90035	0.00766	100	3.37919	0.00821	24.1371	0.0586429
Apo	4091	4107	YTINPSSHCNPNHLSYF	14	1992.88	7.90554	0.003283	1000	3.84203	0.106803	27.4431	0.762879
Apo	4091	4107	YTINPSSHCNPNHLSYF	14	1992.88	7.88653	0.009807	10000	3.99721	0.150531	28.5515	1.07522
BI8622	4092	4099	TINPSSHC	6	857.37	5.47052	0.003071	0	0	0	0	0
BI8622	4092	4099	TINPSSHC	6	857.37	5.44217	0.004327	10	1.86562	0.01504	31.0936	0.250667
BI8622	4092	4099	TINPSSHC	6	857.37	5.44532	0.002239	30	1.87041	0.016841	31.1734	0.280683
BI8622	4092	4099	TINPSSHC	6	857.37	5.43485	0.003031	100	1.83795	0.020808	30.6325	0.3468
BI8622	4092	4099	TINPSSHC	6	857.37	5.45045	0.007182	1000	1.75436	0.010989	29.2394	0.18315
BI8622	4092	4099	TINPSSHC	6	857.37	5.44425	0.002624	10000	1.9002	0.008541	31.67	0.14235
BI8626	4092	4099	TINPSSHC	6	857.37	5.47401	0.0084	0	0	0	0	0
BI8626	4092	4099	TINPSSHC	6	857.37	5.44655	0.005594	10	1.8546	0.023366	30.9099	0.389433
BI8626	4092	4099	TINPSSHC	6	857.37	5.45401	0.004326	30	1.96737	0.022943	32.7894	0.382383
BI8626	4092	4099	TINPSSHC	6	857.37	5.44074	0.00577	100	1.84018	0.020707	30.6696	0.345117
BI8626	4092	4099	TINPSSHC	6	857.37	5.45314	0.003304	1000	1.78196	0.027555	29.6993	0.45925
BI8626	4092	4099	TINPSSHC	6	857.37	5.43597	0.002024	10000	1.88799	0.018459	31.4665	0.30765
Apo	4092	4099	TINPSSHC	6	857.37	5.46787	0.002116	0	0	0	0	0
Apo	4092	4099	TINPSSHC	6	857.37	5.46894	0.021181	10	1.8376	0.014816	30.6266	0.246933
Apo	4092	4099	TINPSSHC	6	857.37	5.4455	0.005282	30	1.90476	0.0204	31.7461	0.34
Apo	4092	4099	TINPSSHC	6	857.37	5.44389	0.006555	100	1.82367	0.029089	30.3945	0.484817
Apo	4092	4099	TINPSSHC	6	857.37	5.45148	0.005201	1000	1.76316	0.062469	29.386	1.04115
Apo	4092	4099	TINPSSHC	6	857.37	5.4285	0.001305	10000	1.90741	0.014384	31.7902	0.239733
BI8622	4092	4102	TINPSSHCNPN	8	1182.51	5.33652	0.00306	0	0	0	0	0
BI8622	4092	4102	TINPSSHCNPN	8	1182.51	5.29267	0.005879	10	2.12293	0.048292	26.5366	0.60365
BI8622	4092	4102	TINPSSHCNPN	8	1182.51	5.29419	0.003415	30	2.21972	0.032446	27.7465	0.405575
BI8622	4092	4102	TINPSSHCNPN	8	1182.51	5.28597	0.002643	100	2.16178	0.020292	27.0223	0.25365
BI8622	4092	4102	TINPSSHCNPN	8	1182.51	5.30461	0.003733	1000	2.09382	0.019041	26.1727	0.238012
BI8622	4092	4102	TINPSSHCNPN	8	1182.51	5.298	0.003125	10000	2.22985	0.007734	27.8731	0.096675
BI8626	4092	4102	TINPSSHCNPN	8	1182.51	5.33981	0.007147	0	0	0	0	0
BI8626	4092	4102	TINPSSHCNPN	8	1182.51	5.29536	0.004901	10	2.14852	0.02915	26.8565	0.364375
BI8626	4092	4102	TINPSSHCNPN	8	1182.51	5.29907	0.001499	30	2.24842	0.031373	28.1053	0.392162
BI8626	4092	4102	TINPSSHCNPN	8	1182.51	5.29042	0.004629	100	2.19362	0.028809	27.4203	0.360113
BI8626	4092	4102	TINPSSHCNPN	8	1182.51	5.30745	0.004025	1000	2.09509	0.070287	26.1887	0.878588
BI8626	4092	4102	TINPSSHCNPN	8	1182.51	5.28932	0.003354	10000	2.24641	0.018889	28.0802	0.236113
Apo	4092	4102	TINPSSHCNPN	8	1182.51	5.33678	0.002158	0	0	0	0	0
Apo	4092	4102	TINPSSHCNPN	8	1182.51	5.32655	0.02578	10	2.09514	0.024028	26.1893	0.30035
Apo	4092	4102	TINPSSHCNPN	8	1182.51	5.29527	0.004345	30	2.20752	0.024665	27.5939	0.308312
Apo	4092	4102	TINPSSHCNPN	8	1182.51	5.29101	0.008033	100	2.18082	0.018305	27.2603	0.228812
Apo	4092	4102	TINPSSHCNPN	8	1182.51	5.30343	0.004951	1000	2.09863	0.028597	26.2329	0.357463
Apo	4092	4102	TINPSSHCNPN	8	1182.51	5.28061	0.00416	10000	2.25574	0.029588	28.1967	0.36985
BI8622	4092	4106	TINPSSHCNPNHLSY	12	1682.75	6.50026	0.001779	0	0	0	0	0
BI8622	4092	4106	TINPSSHCNPNHLSY	12	1682.75	6.52637	0.003838	10	2.35031	0.039355	19.5859	0.327958
BI8622	4092	4106	TINPSSHCNPNHLSY	12	1682.75	6.53602	0.007037	30	2.57614	0.086224	21.4679	0.718533
BI8622	4092	4106	TINPSSHCNPNHLSY	12	1682.75	6.52496	0.002583	100	2.89187	0.070957	24.0989	0.591308
BI8622	4092	4106	TINPSSHCNPNHLSY	12	1682.75	6.52164	0.008096	1000	3.42822	0.046691	28.5685	0.389092
BI8622	4092	4106	TINPSSHCNPNHLSY	12	1682.75	6.53101	0.002104	10000	3.50657	0.034092	29.2214	0.2841
BI8626	4092	4106	TINPSSHCNPNHLSY	12	1682.75	6.50365	0.002273	0	0	0	0	0
BI8626	4092	4106	TINPSSHCNPNHLSY	12	1682.75	6.52766	0.006994	10	2.37444	0.065532	19.787	0.5461
BI8626	4092	4106	TINPSSHCNPNHLSY	12	1682.75	6.53362	0.004468	30	2.60645	0.054825	21.7204	0.456875
BI8626	4092	4106	TINPSSHCNPNHLSY	12	1682.75	6.5278	0.006789	100	2.92933	0.085107	24.4111	0.709225
BI8626	4092	4106	TINPSSHCNPNHLSY	12	1682.75	6.5161	0.004475	1000	3.39264	0.062492	28.272	0.520767
BI8626	4092	4106	TINPSSHCNPNHLSY	12	1682.75	6.53267	0.002851	10000	3.6258	0.032367	30.215	0.269725
Apo	4092	4106	TINPSSHCNPNHLSY	12	1682.75	6.49645	0.002889	0	0	0	0	0
Apo	4092	4106	TINPSSHCNPNHLSY	12	1682.75	6.52322	0.003156	10	2.47889	0.04787	20.6574	0.398917
Apo	4092	4106	TINPSSHCNPNHLSY	12	1682.75	6.53439	0.008322	30	2.65484	0.075052	22.1237	0.625433
Apo	4092	4106	TINPSSHCNPNHLSY	12	1682.75	6.5304	0.005444	100	2.9383	0.077895	24.4858	0.649125
Apo	4092	4106	TINPSSHCNPNHLSY	12	1682.75	6.52818	0.003897	1000	3.43487	0.068432	28.6239	0.570267
Apo	4092	4106	TINPSSHCNPNHLSY	12	1682.75	6.51823	0.007145	10000	3.52947	0.057099	29.4123	0.475825
BI8622	4098	4106	HCNPNHLSY	7	1083.46	6.01727	0.004715	0	0	0	0	0
BI8622	4098	4106	HCNPNHLSY	7	1083.46	6.05477	0.003234	10	1.017	0.02041	14.5285	0.291571
BI8622	4098	4106	HCNPNHLSY	7	1083.46	6.0623	0.00948	30	1.18573	0.026497	16.939	0.378529
BI8622	4098	4106	HCNPNHLSY	7	1083.46	6.04312	0.002533	100	1.43192	0.024264	20.456	0.346629
BI8622	4098	4106	HCNPNHLSY	7	1083.46	6.04428	0.007384	1000	1.92474	0.036048	27.4963	0.514971
BI8622	4098	4106	HCNPNHLSY	7	1083.46	6.05217	0.001862	10000	2.05084	0.034187	29.2978	0.488386
BI8626	4098	4106	HCNPNHLSY	7	1083.46	6.0355	0.010663	0	0	0	0	0
BI8626	4098	4106	HCNPNHLSY	7	1083.46	6.05399	0.004564	10	1.02291	0.037041	14.613	0.529157
BI8626	4098	4106	HCNPNHLSY	7	1083.46	6.06155	0.00612	30	1.18126	0.042007	16.8752	0.6001
BI8626	4098	4106	HCNPNHLSY	7	1083.46	6.05293	0.006198	100	1.43888	0.03944	20.5555	0.563429
BI8626	4098	4106	HCNPNHLSY	7	1083.46	6.03955	0.005051	1000	1.91717	0.047821	27.3881	0.683157
BI8626	4098	4106	HCNPNHLSY	7	1083.46	6.05387	0.002873	10000	2.06005	0.05551	29.4292	0.793
Apo	4098	4106	HCNPNHLSY	7	1083.46	6.01374	0.006095	0	0	0	0	0
Apo	4098	4106	HCNPNHLSY	7	1083.46	6.05294	0.008147	10	1.06544	0.024131	15.2206	0.344729
Apo	4098	4106	HCNPNHLSY	7	1083.46	6.05878	0.003361	30	1.18283	0.019707	16.8976	0.281529
Apo	4098	4106	HCNPNHLSY	7	1083.46	6.05389	0.007082	100	1.42982	0.027702	20.426	0.395743
Apo	4098	4106	HCNPNHLSY	7	1083.46	6.04999	0.000981	1000	1.94078	0.039515	27.7254	0.5645
Apo	4098	4106	HCNPNHLSY	7	1083.46	6.03772	0.011377	10000	2.04134	0.035455	29.162	0.5065
BI8622	4107	4111	FKFVG	4	596.332	7.60095	0.001632	0	0	0	0	0
BI8622	4107	4111	FKFVG	4	596.332	7.63639	0.003208	10	0.038602	0.003178	0.96505	0.07945
BI8622	4107	4111	FKFVG	4	596.332	7.64486	0.010115	30	0.051323	0.003052	1.28307	0.0763
BI8622	4107	4111	FKFVG	4	596.332	7.62998	0.00348	100	0.056989	0.00393	1.42473	0.09825
BI8622	4107	4111	FKFVG	4	596.332	7.63077	0.00761	1000	0.049366	0.005239	1.23415	0.130975
BI8622	4107	4111	FKFVG	4	596.332	7.64029	0.003489	10000	0.05196	0.004414	1.299	0.11035
BI8626	4107	4111	FKFVG	4	596.332	7.5935	0.003021	0	0	0	0	0
BI8626	4107	4111	FKFVG	4	596.332	7.62014	0.010634	10	0.043992	0.005636	1.0998	0.1409
BI8626	4107	4111	FKFVG	4	596.332	7.62183	0.0097	30	0.047235	0.010723	1.18087	0.268075
BI8626	4107	4111	FKFVG	4	596.332	7.62186	0.00645	100	0.044858	0.004832	1.12145	0.1208
BI8626	4107	4111	FKFVG	4	596.332	7.60884	0.002438	1000	0.047022	0.005211	1.17555	0.130275
BI8626	4107	4111	FKFVG	4	596.332	7.63037	0.002944	10000	0.054054	0.006773	1.35135	0.169325
Apo	4107	4111	FKFVG	4	596.332	7.59932	0.003158	0	0	0	0	0
Apo	4107	4111	FKFVG	4	596.332	7.63762	0.008711	10	0.046462	0.005504	1.16155	0.1376
Apo	4107	4111	FKFVG	4	596.332	7.64201	0.006263	30	0.044388	0.008013	1.1097	0.200325
Apo	4107	4111	FKFVG	4	596.332	7.63987	0.006168	100	0.045367	0.005718	1.13417	0.14295
Apo	4107	4111	FKFVG	4	596.332	7.63837	0.002667	1000	0.050862	0.005477	1.27155	0.136925
Apo	4107	4111	FKFVG	4	596.332	7.62779	0.010514	10000	0.051751	0.005664	1.29377	0.1416
BI8622	4107	4112	FKFVGR	5	752.433	6.65127	0.003735	0	0	0	0	0
BI8622	4107	4112	FKFVGR	5	752.433	6.62767	0.005285	10	0.093172	0.008471	1.86344	0.16942
BI8622	4107	4112	FKFVGR	5	752.433	6.62832	0.003806	30	0.106215	0.009613	2.1243	0.19226
BI8622	4107	4112	FKFVGR	5	752.433	6.61673	0.004446	100	0.103706	0.011944	2.07412	0.23888
BI8622	4107	4112	FKFVGR	5	752.433	6.64303	0.008498	1000	0.051534	0.016845	1.03068	0.3369
BI8622	4107	4112	FKFVGR	5	752.433	6.63278	0.000136	10000	0.09945	0.009109	1.989	0.18218
BI8626	4107	4112	FKFVGR	5	752.433	6.65473	0.008615	0	0	0	0	0
BI8626	4107	4112	FKFVGR	5	752.433	6.63212	0.004999	10	0.118071	0.018003	2.36142	0.36006
BI8626	4107	4112	FKFVGR	5	752.433	6.63234	0.00282	30	0.10604	0.014868	2.1208	0.29736
BI8626	4107	4112	FKFVGR	5	752.433	6.62301	0.006835	100	0.114223	0.015466	2.28446	0.30932
BI8626	4107	4112	FKFVGR	5	752.433	6.64945	0.006232	1000	0.083386	0.026782	1.66772	0.53564
BI8626	4107	4112	FKFVGR	5	752.433	6.62209	0.001844	10000	0.114459	0.011365	2.28918	0.2273
Apo	4107	4112	FKFVGR	5	752.433	6.65009	0.000856	0	0	0	0	0
Apo	4107	4112	FKFVGR	5	752.433	6.65238	0.022099	10	0.110998	0.012779	2.21996	0.25558
Apo	4107	4112	FKFVGR	5	752.433	6.63051	0.004002	30	0.093186	0.01201	1.86372	0.2402
Apo	4107	4112	FKFVGR	5	752.433	6.62767	0.006042	100	0.123272	0.009404	2.46544	0.18808
Apo	4107	4112	FKFVGR	5	752.433	6.63751	0.006935	1000	0.099779	0.012101	1.99558	0.24202
Apo	4107	4112	FKFVGR	5	752.433	6.61582	0.003909	10000	0.127399	0.019949	2.54798	0.39898
BI8622	4108	4112	KFVGR	4	605.364	4.75318	0.002964	0	0	0	0	0
BI8622	4108	4112	KFVGR	4	605.364	4.73912	0.002526	10	0.07292	0.007184	1.823	0.1796
BI8622	4108	4112	KFVGR	4	605.364	4.74129	0.004339	30	0.077407	0.005996	1.93518	0.1499
BI8622	4108	4112	KFVGR	4	605.364	4.73205	0.007267	100	0.081131	0.008737	2.02827	0.218425
BI8622	4108	4112	KFVGR	4	605.364	4.74189	0.008369	1000	0.049368	0.010854	1.2342	0.27135
BI8622	4108	4112	KFVGR	4	605.364	4.73995	0.001837	10000	0.076186	0.013754	1.90465	0.34385
BI8626	4108	4112	KFVGR	4	605.364	4.75816	0.008684	0	0	0	0	0
BI8626	4108	4112	KFVGR	4	605.364	4.74144	0.003868	10	0.086475	0.016706	2.16187	0.41765
BI8626	4108	4112	KFVGR	4	605.364	4.74705	0.000748	30	0.072636	0.01874	1.8159	0.4685
BI8626	4108	4112	KFVGR	4	605.364	4.73896	0.003584	100	0.094709	0.02046	2.36773	0.5115
BI8626	4108	4112	KFVGR	4	605.364	4.74805	0.003771	1000	0.068747	0.01633	1.71868	0.40825
BI8626	4108	4112	KFVGR	4	605.364	4.73206	0.002254	10000	0.079662	0.016533	1.99155	0.413325
Apo	4108	4112	KFVGR	4	605.364	4.75128	0.003892	0	0	0	0	0
Apo	4108	4112	KFVGR	4	605.364	4.76534	0.022674	10	0.089418	0.012989	2.23545	0.324725
Apo	4108	4112	KFVGR	4	605.364	4.74181	0.006907	30	0.065955	0.011058	1.64888	0.27645
Apo	4108	4112	KFVGR	4	605.364	4.74215	0.008245	100	0.083856	0.010739	2.0964	0.268475
Apo	4108	4112	KFVGR	4	605.364	4.74325	0.00419	1000	0.069614	0.014484	1.74035	0.3621
Apo	4108	4112	KFVGR	4	605.364	4.7247	0.001989	10000	0.077616	0.010998	1.9404	0.27495
BI8622	4110	4115	VGRIVA	5	613.391	5.86674	0.008714	0	0	0	0	0
BI8622	4110	4115	VGRIVA	5	613.391	5.8586	0.01461	10	0.100932	0.045517	2.01864	0.91034
BI8622	4110	4115	VGRIVA	5	613.391	5.86195	0.019819	30	0.107374	0.040869	2.14748	0.81738
BI8622	4110	4115	VGRIVA	5	613.391	5.845	0.013214	100	0.091729	0.038548	1.83458	0.77096
BI8622	4110	4115	VGRIVA	5	613.391	5.86264	0.011467	1000	0.060468	0.031577	1.20936	0.63154
BI8622	4110	4115	VGRIVA	5	613.391	5.85707	0.017477	10000	0.077037	0.038353	1.54074	0.76706
BI8626	4110	4115	VGRIVA	5	613.391	5.8761	0.011886	0	0	0	0	0
BI8626	4110	4115	VGRIVA	5	613.391	5.86062	0.013345	10	0.091746	0.043398	1.83492	0.86796
BI8626	4110	4115	VGRIVA	5	613.391	5.87021	0.01436	30	0.073927	0.042009	1.47854	0.84018
BI8626	4110	4115	VGRIVA	5	613.391	5.8527	0.01733	100	0.094099	0.045465	1.88198	0.9093
BI8626	4110	4115	VGRIVA	5	613.391	5.86368	0.008583	1000	0.058324	0.038164	1.16648	0.76328
BI8626	4110	4115	VGRIVA	5	613.391	5.84854	0.022107	10000	0.07271	0.04233	1.4542	0.8466
Apo	4110	4115	VGRIVA	5	613.391	5.86834	0.00403	0	0	0	0	0
Apo	4110	4115	VGRIVA	5	613.391	5.87788	0.019722	10	0.070905	0.048631	1.4181	0.97262
Apo	4110	4115	VGRIVA	5	613.391	5.86268	0.015429	30	0.057681	0.047077	1.15362	0.94154
Apo	4110	4115	VGRIVA	5	613.391	5.85641	0.015882	100	0.068958	0.050873	1.37916	1.01746
Apo	4110	4115	VGRIVA	5	613.391	5.8652	0.011548	1000	0.04762	0.046032	0.9524	0.92064
Apo	4110	4115	VGRIVA	5	613.391	5.83936	0.018093	10000	0.069465	0.055236	1.3893	1.10472
BI8622	4113	4119	IVAKAVY	6	762.464	6.33391	0.002292	0	0	0	0	0
BI8622	4113	4119	IVAKAVY	6	762.464	6.31095	0.004017	10	0.05436	0.016533	0.906	0.27555
BI8622	4113	4119	IVAKAVY	6	762.464	6.31316	0.005241	30	0.038301	0.012061	0.63835	0.201017
BI8622	4113	4119	IVAKAVY	6	762.464	6.30092	0.004369	100	0.033506	0.010999	0.558433	0.183317
BI8622	4113	4119	IVAKAVY	6	762.464	6.31124	0.004393	1000	0.036279	0.010614	0.60465	0.1769
BI8622	4113	4119	IVAKAVY	6	762.464	6.30808	0.001917	10000	0.024121	0.012211	0.402017	0.203517
BI8626	4113	4119	IVAKAVY	6	762.464	6.33779	0.006418	0	0	0	0	0
BI8626	4113	4119	IVAKAVY	6	762.464	6.31495	0.006149	10	0.030436	0.010465	0.507267	0.174417
BI8626	4113	4119	IVAKAVY	6	762.464	6.31569	0.002261	30	0.022097	0.009796	0.368283	0.163267
BI8626	4113	4119	IVAKAVY	6	762.464	6.30715	0.00605	100	0.023446	0.009297	0.390767	0.15495
BI8626	4113	4119	IVAKAVY	6	762.464	6.31375	0.003506	1000	0.035458	0.024864	0.590967	0.4144
BI8626	4113	4119	IVAKAVY	6	762.464	6.29652	0.002139	10000	0.001904	0.00891	0.0317333	0.1485
Apo	4113	4119	IVAKAVY	6	762.464	6.33493	0.002307	0	0	0	0	0
Apo	4113	4119	IVAKAVY	6	762.464	6.33971	0.020304	10	0.057897	0.009762	0.96495	0.1627
Apo	4113	4119	IVAKAVY	6	762.464	6.31397	0.008092	30	0.035747	0.008298	0.595783	0.1383
Apo	4113	4119	IVAKAVY	6	762.464	6.31041	0.008138	100	0.036834	0.008106	0.6139	0.1351
Apo	4113	4119	IVAKAVY	6	762.464	6.31813	0.005556	1000	0.032528	0.020774	0.542133	0.346233
Apo	4113	4119	IVAKAVY	6	762.464	6.29255	0.002401	10000	0.026438	0.01373	0.440633	0.228833
BI8622	4113	4120	IVAKAVYD	7	877.49	6.12056	0.001669	0	0	0	0	0
BI8622	4113	4120	IVAKAVYD	7	877.49	6.10331	0.003833	10	0.079227	0.008286	1.13181	0.118371
BI8622	4113	4120	IVAKAVYD	7	877.49	6.10443	0.004421	30	0.089475	0.005214	1.27821	0.0744857
BI8622	4113	4120	IVAKAVYD	7	877.49	6.09445	0.003327	100	0.069032	0.015585	0.986171	0.222643
BI8622	4113	4120	IVAKAVYD	7	877.49	6.10924	0.005837	1000	0.060004	0.012594	0.8572	0.179914
BI8622	4113	4120	IVAKAVYD	7	877.49	6.10466	0.00252	10000	0.084633	0.006614	1.20904	0.0944857
BI8626	4113	4120	IVAKAVYD	7	877.49	6.12588	0.008015	0	0	0	0	0
BI8626	4113	4120	IVAKAVYD	7	877.49	6.10651	0.00518	10	0.110598	0.013481	1.57997	0.192586
BI8626	4113	4120	IVAKAVYD	7	877.49	6.11125	0.00246	30	0.089264	0.01999	1.2752	0.285571
BI8626	4113	4120	IVAKAVYD	7	877.49	6.10036	0.00498	100	0.104104	0.012872	1.4872	0.183886
BI8626	4113	4120	IVAKAVYD	7	877.49	6.11272	0.00314	1000	0.092956	0.019917	1.32794	0.284529
BI8626	4113	4120	IVAKAVYD	7	877.49	6.09307	0.003148	10000	0.109803	0.011994	1.56861	0.171343
Apo	4113	4120	IVAKAVYD	7	877.49	6.12117	0.003228	0	0	0	0	0
Apo	4113	4120	IVAKAVYD	7	877.49	6.12552	0.018764	10	0.091382	0.008185	1.30546	0.116929
Apo	4113	4120	IVAKAVYD	7	877.49	6.10685	0.004602	30	0.090324	0.002398	1.29034	0.0342571
Apo	4113	4120	IVAKAVYD	7	877.49	6.10345	0.006661	100	0.085972	0.005122	1.22817	0.0731714
Apo	4113	4120	IVAKAVYD	7	877.49	6.11316	0.004555	1000	0.095497	0.005421	1.36424	0.0774429
Apo	4113	4120	IVAKAVYD	7	877.49	6.08805	0.00295	10000	0.094112	0.008562	1.34446	0.122314
BI8622	4116	4123	KAVYDNRL	7	977.529	6.26778	0.020216	0	0	0	0	0
BI8622	4116	4123	KAVYDNRL	7	977.529	6.26919	0.006883	10	0.202794	0.166976	2.89706	2.38537
BI8622	4116	4123	KAVYDNRL	7	977.529	6.27153	0.01403	30	0.2587	0.168851	3.69571	2.41216
BI8622	4116	4123	KAVYDNRL	7	977.529	6.24966	0.00342	100	0.387294	0.167835	5.53277	2.39764
BI8622	4116	4123	KAVYDNRL	7	977.529	6.25728	0.010395	1000	0.618037	0.150989	8.8291	2.15699
BI8622	4116	4123	KAVYDNRL	7	977.529	6.2587	0.004435	10000	0.657014	0.146369	9.38591	2.09099
BI8626	4116	4123	KAVYDNRL	7	977.529	6.27362	0.016927	0	0	0	0	0
BI8626	4116	4123	KAVYDNRL	7	977.529	6.26889	0.00659	10	0.193482	0.158127	2.76403	2.25896
BI8626	4116	4123	KAVYDNRL	7	977.529	6.27446	0.0094	30	0.267863	0.14123	3.82661	2.01757
BI8626	4116	4123	KAVYDNRL	7	977.529	6.26105	0.010112	100	0.375185	0.143654	5.35979	2.0522
BI8626	4116	4123	KAVYDNRL	7	977.529	6.25732	0.007539	1000	0.590584	0.139574	8.43691	1.99391
BI8626	4116	4123	KAVYDNRL	7	977.529	6.2581	0.009158	10000	0.656181	0.138379	9.37401	1.97684
Apo	4116	4123	KAVYDNRL	7	977.529	6.26647	0.020445	0	0	0	0	0
Apo	4116	4123	KAVYDNRL	7	977.529	6.27553	0.015242	10	0.220587	0.162074	3.15124	2.31534
Apo	4116	4123	KAVYDNRL	7	977.529	6.27231	0.009295	30	0.26589	0.157512	3.79843	2.25017
Apo	4116	4123	KAVYDNRL	7	977.529	6.26731	0.011971	100	0.365982	0.149174	5.22831	2.13106
Apo	4116	4123	KAVYDNRL	7	977.529	6.26517	0.003086	1000	0.614604	0.149721	8.78006	2.13887
Apo	4116	4123	KAVYDNRL	7	977.529	6.24227	0.008551	10000	0.662499	0.146855	9.46427	2.09793
BI8622	4117	4122	AVYDNR	5	736.35	5.28844	0.003415	0	0	0	0	0
BI8622	4117	4122	AVYDNR	5	736.35	5.2603	0.003205	10	0.14356	0.069455	2.8712	1.3891
BI8622	4117	4122	AVYDNR	5	736.35	5.26117	0.004369	30	0.182836	0.004114	3.65672	0.08228
BI8622	4117	4122	AVYDNR	5	736.35	5.24929	0.005689	100	0.184535	0.004326	3.6907	0.08652
BI8622	4117	4122	AVYDNR	5	736.35	5.26472	0.007324	1000	0.195893	0.023064	3.91786	0.46128
BI8622	4117	4122	AVYDNR	5	736.35	5.25835	0.002771	10000	0.230779	0.016948	4.61558	0.33896
BI8626	4117	4122	AVYDNR	5	736.35	5.29211	0.009821	0	0	0	0	0
BI8626	4117	4122	AVYDNR	5	736.35	5.26553	0.00464	10	0.219476	0.012291	4.38952	0.24582
BI8626	4117	4122	AVYDNR	5	736.35	5.26658	0.002015	30	0.137409	0.071051	2.74818	1.42102
BI8626	4117	4122	AVYDNR	5	736.35	5.26099	0.0144	100	0.193648	0.02999	3.87296	0.5998
BI8626	4117	4122	AVYDNR	5	736.35	5.27018	0.002832	1000	0.193262	0.027654	3.86524	0.55308
BI8626	4117	4122	AVYDNR	5	736.35	5.24813	0.002933	10000	0.26418	0.012007	5.2836	0.24014
Apo	4117	4122	AVYDNR	5	736.35	5.28912	0.00182	0	0	0	0	0
Apo	4117	4122	AVYDNR	5	736.35	5.28802	0.021086	10	0.139879	0.066889	2.79758	1.33778
Apo	4117	4122	AVYDNR	5	736.35	5.26168	0.007885	30	0.151526	0.012804	3.03052	0.25608
Apo	4117	4122	AVYDNR	5	736.35	5.2613	0.008218	100	0.172535	0.014956	3.4507	0.29912
Apo	4117	4122	AVYDNR	5	736.35	5.26273	0.004348	1000	0.166651	0.016989	3.33302	0.33978
Apo	4117	4122	AVYDNR	5	736.35	5.24313	0.001032	10000	0.242661	0.039633	4.85322	0.79266
BI8622	4118	4123	VYDNRL	5	778.397	6.4964	0.005845	0	0	0	0	0
BI8622	4118	4123	VYDNRL	5	778.397	6.53687	0.008153	10	0.300525	0.009918	6.0105	0.19836
BI8622	4118	4123	VYDNRL	5	778.397	6.54853	0.011258	30	0.409679	0.0131	8.19358	0.262
BI8622	4118	4123	VYDNRL	5	778.397	6.47789	0.050753	100	0.528424	0.061591	10.5685	1.23182
BI8622	4118	4123	VYDNRL	5	778.397	6.53292	0.007992	1000	0.857301	0.016427	17.146	0.32854
BI8622	4118	4123	VYDNRL	5	778.397	6.53821	0.001693	10000	0.9204	0.010612	18.408	0.21224
BI8626	4118	4123	VYDNRL	5	778.397	6.51102	0.007428	0	0	0	0	0
BI8626	4118	4123	VYDNRL	5	778.397	6.53709	0.012789	10	0.291866	0.011186	5.83732	0.22372
BI8626	4118	4123	VYDNRL	5	778.397	6.5154	0.051611	30	0.393981	0.022561	7.87962	0.45122
BI8626	4118	4123	VYDNRL	5	778.397	6.53608	0.00592	100	0.571833	0.005348	11.4367	0.10696
BI8626	4118	4123	VYDNRL	5	778.397	6.52733	0.006834	1000	0.838773	0.004255	16.7755	0.0851
BI8626	4118	4123	VYDNRL	5	778.397	6.54087	0.002808	10000	0.91904	0.017092	18.3808	0.34184
Apo	4118	4123	VYDNRL	5	778.397	6.49793	0.001196	0	0	0	0	0
Apo	4118	4123	VYDNRL	5	778.397	6.53884	0.010818	10	0.273691	0.015153	5.47382	0.30306
Apo	4118	4123	VYDNRL	5	778.397	6.53901	0.006508	30	0.375819	0.015609	7.51638	0.31218
Apo	4118	4123	VYDNRL	5	778.397	6.53557	0.009437	100	0.525	0.020878	10.5	0.41756
Apo	4118	4123	VYDNRL	5	778.397	6.53287	0.001088	1000	0.859964	0.019718	17.1993	0.39436
Apo	4118	4123	VYDNRL	5	778.397	6.52463	0.011798	10000	0.911221	0.014671	18.2244	0.29342
BI8622	4119	4123	YDNRL	4	679.328	6.91768	0.003861	0	0	0	0	0
BI8622	4119	4123	YDNRL	4	679.328	6.90263	0.006133	10	0.221548	0.008108	5.5387	0.2027
BI8622	4119	4123	YDNRL	4	679.328	6.89998	0.002178	30	0.289659	0.009338	7.24148	0.23345
BI8622	4119	4123	YDNRL	4	679.328	6.88883	0.003623	100	0.40737	0.009313	10.1843	0.232825
BI8622	4119	4123	YDNRL	4	679.328	6.91358	0.004697	1000	0.693062	0.013413	17.3265	0.335325
BI8622	4119	4123	YDNRL	4	679.328	6.89623	0.000435	10000	0.759064	0.008925	18.9766	0.223125
BI8626	4119	4123	YDNRL	4	679.328	6.91647	0.00747	0	0	0	0	0
BI8626	4119	4123	YDNRL	4	679.328	6.90279	0.007053	10	0.262863	0.012868	6.57158	0.3217
BI8626	4119	4123	YDNRL	4	679.328	6.91096	0.00259	30	0.333618	0.009558	8.34045	0.23895
BI8626	4119	4123	YDNRL	4	679.328	6.8901	0.004903	100	0.486978	0.009557	12.1745	0.238925
BI8626	4119	4123	YDNRL	4	679.328	6.91653	0.001463	1000	0.69998	0.015952	17.4995	0.3988
BI8626	4119	4123	YDNRL	4	679.328	6.89588	0.003462	10000	0.748031	0.009549	18.7008	0.238725
Apo	4119	4123	YDNRL	4	679.328	6.91757	0.002298	0	0	0	0	0
Apo	4119	4123	YDNRL	4	679.328	6.91867	0.01788	10	0.236918	0.008453	5.92295	0.211325
Apo	4119	4123	YDNRL	4	679.328	6.90428	0.004302	30	0.320234	0.002787	8.00585	0.069675
Apo	4119	4123	YDNRL	4	679.328	6.89968	0.008279	100	0.438166	0.003579	10.9542	0.089475
Apo	4119	4123	YDNRL	4	679.328	6.91616	0.004702	1000	0.678872	0.007121	16.9718	0.178025
Apo	4119	4123	YDNRL	4	679.328	6.88602	0.007753	10000	0.740399	0.009549	18.51	0.238725
BI8622	4124	4128	LECYF	4	673.278	9.52647	0.002495	0	0	0	0	0
BI8622	4124	4128	LECYF	4	673.278	9.58054	0.003102	10	0.194692	0.01095	4.8673	0.27375
BI8622	4124	4128	LECYF	4	673.278	9.58454	0.011276	30	0.358476	0.012053	8.9619	0.301325
BI8622	4124	4128	LECYF	4	673.278	9.5674	0.004254	100	0.80207	0.016933	20.0517	0.423325
BI8622	4124	4128	LECYF	4	673.278	9.56748	0.008912	1000	1.52691	0.013969	38.1727	0.349225
BI8622	4124	4128	LECYF	4	673.278	9.57533	0.005383	10000	1.80857	0.018468	45.2141	0.4617
BI8626	4124	4128	LECYF	4	673.278	9.54626	0.011243	0	0	0	0	0
BI8626	4124	4128	LECYF	4	673.278	9.58038	0.002558	10	0.212181	0.008236	5.30452	0.2059
BI8626	4124	4128	LECYF	4	673.278	9.58444	0.003514	30	0.383972	0.007746	9.5993	0.19365
BI8626	4124	4128	LECYF	4	673.278	9.57704	0.007291	100	0.800012	0.031688	20.0003	0.7922
BI8626	4124	4128	LECYF	4	673.278	9.56299	0.001309	1000	1.51951	0.017465	37.9879	0.436625
BI8626	4124	4128	LECYF	4	673.278	9.58164	0.001533	10000	1.83112	0.013644	45.7781	0.3411
Apo	4124	4128	LECYF	4	673.278	9.52443	0.008298	0	0	0	0	0
Apo	4124	4128	LECYF	4	673.278	9.57725	0.010934	10	0.158561	0.029813	3.96403	0.745325
Apo	4124	4128	LECYF	4	673.278	9.58401	0.006507	30	0.363554	0.029878	9.08885	0.74695
Apo	4124	4128	LECYF	4	673.278	9.57767	0.009888	100	0.801238	0.031606	20.031	0.79015
Apo	4124	4128	LECYF	4	673.278	9.57263	0.001687	1000	1.51604	0.036456	37.901	0.9114
Apo	4124	4128	LECYF	4	673.278	9.56364	0.00778	10000	1.75837	0.034005	43.9592	0.850125
BI8622	4127	4131	YFTRS	4	672.323	5.78329	0.009741	0	0	0	0	0
BI8622	4127	4131	YFTRS	4	672.323	5.82073	0.012359	10	1.20094	0.014175	30.0236	0.354375
BI8622	4127	4131	YFTRS	4	672.323	5.83882	0.012009	30	1.30342	0.015416	32.5855	0.3854
BI8622	4127	4131	YFTRS	4	672.323	5.80782	0.00474	100	1.32503	0.018547	33.1258	0.463675
BI8622	4127	4131	YFTRS	4	672.323	5.82135	0.007605	1000	1.46193	0.055201	36.5482	1.38003
BI8622	4127	4131	YFTRS	4	672.323	5.82109	0.00256	10000	1.8712	0.00949	46.7799	0.23725
BI8626	4127	4131	YFTRS	4	672.323	5.79699	0.01256	0	0	0	0	0
BI8626	4127	4131	YFTRS	4	672.323	5.81769	0.012239	10	1.22932	0.018667	30.7329	0.466675
BI8626	4127	4131	YFTRS	4	672.323	5.8351	0.003945	30	1.31636	0.017924	32.9089	0.4481
BI8626	4127	4131	YFTRS	4	672.323	5.82217	0.006701	100	1.35482	0.012152	33.8705	0.3038
BI8626	4127	4131	YFTRS	4	672.323	5.81184	0.008947	1000	1.51052	0.012775	37.763	0.319375
BI8626	4127	4131	YFTRS	4	672.323	5.82857	0.002999	10000	1.9176	0.019214	47.94	0.48035
Apo	4127	4131	YFTRS	4	672.323	5.79364	0.004833	0	0	0	0	0
Apo	4127	4131	YFTRS	4	672.323	5.82244	0.010884	10	1.25574	0.029993	31.3935	0.749825
Apo	4127	4131	YFTRS	4	672.323	5.81872	0.007725	30	1.33303	0.028429	33.3259	0.710725
Apo	4127	4131	YFTRS	4	672.323	5.82155	0.012161	100	1.33103	0.014835	33.2758	0.370875
Apo	4127	4131	YFTRS	4	672.323	5.82056	0.004792	1000	1.52123	0.020008	38.0307	0.5002
Apo	4127	4131	YFTRS	4	672.323	5.81061	0.015212	10000	1.88449	0.024456	47.1123	0.6114
BI8622	4127	4132	YFTRSF	5	819.391	7.66688	0.001243	0	0	0	0	0
BI8622	4127	4132	YFTRSF	5	819.391	7.65389	0.006957	10	1.03229	0.02472	20.6459	0.4944
BI8622	4127	4132	YFTRSF	5	819.391	7.65421	0.004686	30	1.09082	0.012187	21.8164	0.24374
BI8622	4127	4132	YFTRSF	5	819.391	7.64261	0.002825	100	1.12595	0.010618	22.5189	0.21236
BI8622	4127	4132	YFTRSF	5	819.391	7.65857	0.003191	1000	1.46508	0.028774	29.3016	0.57548
BI8622	4127	4132	YFTRSF	5	819.391	7.65129	0.002351	10000	2.31732	0.008751	46.3463	0.17502
BI8626	4127	4132	YFTRSF	5	819.391	7.67536	0.009157	0	0	0	0	0
BI8626	4127	4132	YFTRSF	5	819.391	7.66333	0.00508	10	1.04025	0.010822	20.805	0.21644
BI8626	4127	4132	YFTRSF	5	819.391	7.66317	0.002359	30	1.13966	0.016881	22.7932	0.33762
BI8626	4127	4132	YFTRSF	5	819.391	7.6537	0.006923	100	1.1805	0.009322	23.61	0.18644
BI8626	4127	4132	YFTRSF	5	819.391	7.66341	0.002233	1000	1.48171	0.012966	29.6341	0.25932
BI8626	4127	4132	YFTRSF	5	819.391	7.64388	0.002058	10000	2.35518	0.010738	47.1036	0.21476
Apo	4127	4132	YFTRSF	5	819.391	7.66743	0.001258	0	0	0	0	0
Apo	4127	4132	YFTRSF	5	819.391	7.67159	0.01536	10	0.983298	0.01674	19.666	0.3348
Apo	4127	4132	YFTRSF	5	819.391	7.65766	0.004359	30	1.13358	0.024184	22.6717	0.48368
Apo	4127	4132	YFTRSF	5	819.391	7.65175	0.009597	100	1.14118	0.009769	22.8237	0.19538
Apo	4127	4132	YFTRSF	5	819.391	7.66025	0.005199	1000	1.48007	0.010844	29.6014	0.21688
Apo	4127	4132	YFTRSF	5	819.391	7.63903	0.007051	10000	2.33248	0.011253	46.6495	0.22506
BI8622	4127	4146	YFTRSFYKHILGKSVRYTDM	19	2511.27	7.43129	0.006175	0	0	0	0	0
BI8622	4127	4146	YFTRSFYKHILGKSVRYTDM	19	2511.27	7.47002	0.001362	10	3.5895	0.047033	18.8921	0.247542
BI8622	4127	4146	YFTRSFYKHILGKSVRYTDM	19	2511.27	7.46512	0.017375	30	3.90622	0.053406	20.559	0.281084
BI8622	4127	4146	YFTRSFYKHILGKSVRYTDM	19	2511.27	7.44841	0.008255	100	4.22432	0.054838	22.2333	0.288621
BI8622	4127	4146	YFTRSFYKHILGKSVRYTDM	19	2511.27	7.45302	0.006483	1000	5.37556	0.031965	28.2924	0.168237
BI8622	4127	4146	YFTRSFYKHILGKSVRYTDM	19	2511.27	7.46248	0.003407	10000	6.46433	0.038043	34.0228	0.200226
BI8626	4127	4146	YFTRSFYKHILGKSVRYTDM	19	2511.27	7.41946	0.004006	0	0	0	0	0
BI8626	4127	4146	YFTRSFYKHILGKSVRYTDM	19	2511.27	7.44322	0.018195	10	3.73736	0.097444	19.6703	0.512863
BI8626	4127	4146	YFTRSFYKHILGKSVRYTDM	19	2511.27	7.45809	0.036617	30	3.92541	0.064097	20.6601	0.337353
BI8626	4127	4146	YFTRSFYKHILGKSVRYTDM	19	2511.27	7.44601	0.009754	100	4.26214	0.080351	22.4323	0.4229
BI8626	4127	4146	YFTRSFYKHILGKSVRYTDM	19	2511.27	7.43416	0.001012	1000	5.43568	0.040851	28.6088	0.215005
BI8626	4127	4146	YFTRSFYKHILGKSVRYTDM	19	2511.27	7.44985	0.002034	10000	6.55687	0.066576	34.5098	0.3504
Apo	4127	4146	YFTRSFYKHILGKSVRYTDM	19	2511.27	7.4345	0.007958	0	0	0	0	0
Apo	4127	4146	YFTRSFYKHILGKSVRYTDM	19	2511.27	7.46853	0.023207	10	3.70375	0.088012	19.4934	0.463221
Apo	4127	4146	YFTRSFYKHILGKSVRYTDM	19	2511.27	7.46883	0.011756	30	3.91165	0.071133	20.5876	0.374384
Apo	4127	4146	YFTRSFYKHILGKSVRYTDM	19	2511.27	7.46782	0.015801	100	4.20735	0.053859	22.144	0.283468
Apo	4127	4146	YFTRSFYKHILGKSVRYTDM	19	2511.27	7.46001	0.000136	1000	5.41856	0.094605	28.5187	0.497921
Apo	4127	4146	YFTRSFYKHILGKSVRYTDM	19	2511.27	7.45302	0.006919	10000	6.36987	0.050174	33.5257	0.264074
BI8622	4128	4132	FTRSF	4	656.328	6.77786	0.003235	0	0	0	0	0
BI8622	4128	4132	FTRSF	4	656.328	6.81564	0.009111	10	1.03899	0.02064	25.9747	0.516
BI8622	4128	4132	FTRSF	4	656.328	6.83132	0.012374	30	1.14176	0.031191	28.5441	0.779775
BI8622	4128	4132	FTRSF	4	656.328	6.80683	0.002753	100	1.19158	0.019454	29.7894	0.48635
BI8622	4128	4132	FTRSF	4	656.328	6.81787	0.007147	1000	1.37673	0.024736	34.4183	0.6184
BI8622	4128	4132	FTRSF	4	656.328	6.82634	0.001182	10000	1.77787	0.023793	44.4468	0.594825
BI8626	4128	4132	FTRSF	4	656.328	6.79143	0.005983	0	0	0	0	0
BI8626	4128	4132	FTRSF	4	656.328	6.81648	0.016154	10	1.05743	0.021694	26.4356	0.54235
BI8626	4128	4132	FTRSF	4	656.328	6.83203	0.007239	30	1.1577	0.022337	28.9425	0.558425
BI8626	4128	4132	FTRSF	4	656.328	6.82049	0.00403	100	1.20568	0.020277	30.1419	0.506925
BI8626	4128	4132	FTRSF	4	656.328	6.81177	0.005021	1000	1.38398	0.017083	34.5994	0.427075
BI8626	4128	4132	FTRSF	4	656.328	6.83144	0.005524	10000	1.79946	0.024063	44.9864	0.601575
Apo	4128	4132	FTRSF	4	656.328	6.77648	0.004491	0	0	0	0	0
Apo	4128	4132	FTRSF	4	656.328	6.81938	0.014157	10	1.10251	0.019727	27.5628	0.493175
Apo	4128	4132	FTRSF	4	656.328	6.82031	0.011434	30	1.19374	0.023669	29.8435	0.591725
Apo	4128	4132	FTRSF	4	656.328	6.82134	0.011275	100	1.21481	0.014321	30.3702	0.358025
Apo	4128	4132	FTRSF	4	656.328	6.82149	0.003375	1000	1.4113	0.027052	35.2825	0.6763
Apo	4128	4132	FTRSF	4	656.328	6.81467	0.011025	10000	1.8005	0.015725	45.0126	0.393125
BI8622	4128	4140	FTRSFYKHILGKS	12	1582.86	6.72556	0.002178	0	0	0	0	0
BI8622	4128	4140	FTRSFYKHILGKS	12	1582.86	6.75566	0.000841	10	1.0827	0.049234	9.02247	0.410283
BI8622	4128	4140	FTRSFYKHILGKS	12	1582.86	6.75916	0.009184	30	1.12604	0.076152	9.3837	0.6346
BI8622	4128	4140	FTRSFYKHILGKS	12	1582.86	6.75364	0.003697	100	1.33247	0.016366	11.1039	0.136383
BI8622	4128	4140	FTRSFYKHILGKS	12	1582.86	6.7478	0.006983	1000	2.08924	0.023697	17.4104	0.197475
BI8622	4128	4140	FTRSFYKHILGKS	12	1582.86	6.75121	0.002415	10000	2.80891	0.04001	23.4076	0.333417
BI8626	4128	4140	FTRSFYKHILGKS	12	1582.86	6.73151	0.000804	0	0	0	0	0
BI8626	4128	4140	FTRSFYKHILGKS	12	1582.86	6.75716	0.015957	10	1.07138	0.069549	8.92817	0.579575
BI8626	4128	4140	FTRSFYKHILGKS	12	1582.86	6.76472	0.019792	30	1.13328	0.029881	9.44397	0.249008
BI8626	4128	4140	FTRSFYKHILGKS	12	1582.86	6.75758	0.005017	100	1.32755	0.024455	11.0629	0.203792
BI8626	4128	4140	FTRSFYKHILGKS	12	1582.86	6.74224	0.002609	1000	2.01939	0.044638	16.8283	0.371983
BI8626	4128	4140	FTRSFYKHILGKS	12	1582.86	6.75377	0.002189	10000	2.77623	0.017767	23.1353	0.148058
Apo	4128	4140	FTRSFYKHILGKS	12	1582.86	6.72572	0.00088	0	0	0	0	0
Apo	4128	4140	FTRSFYKHILGKS	12	1582.86	6.75429	0.008162	10	1.08668	0.04043	9.05564	0.336917
Apo	4128	4140	FTRSFYKHILGKS	12	1582.86	6.76272	0.00463	30	1.15165	0.043739	9.59707	0.364492
Apo	4128	4140	FTRSFYKHILGKS	12	1582.86	6.75634	0.00927	100	1.35454	0.114	11.2878	0.95
Apo	4128	4140	FTRSFYKHILGKS	12	1582.86	6.75343	0.001847	1000	2.05486	0.038745	17.1238	0.322875
Apo	4128	4140	FTRSFYKHILGKS	12	1582.86	6.7401	0.006439	10000	2.80551	0.046996	23.3792	0.391633
BI8622	4129	4140	TRSFYKHILGKS	11	1435.79	6.11559	0.003408	0	0	0	0	0
BI8622	4129	4140	TRSFYKHILGKS	11	1435.79	6.14236	0.002665	10	0.720547	0.018451	6.55043	0.167736
BI8622	4129	4140	TRSFYKHILGKS	11	1435.79	6.14822	0.010059	30	0.780058	0.022208	7.09144	0.201891
BI8622	4129	4140	TRSFYKHILGKS	11	1435.79	6.13447	0.005301	100	0.892325	0.021132	8.11205	0.192109
BI8622	4129	4140	TRSFYKHILGKS	11	1435.79	6.13226	0.009195	1000	1.52137	0.019196	13.8306	0.174509
BI8622	4129	4140	TRSFYKHILGKS	11	1435.79	6.14086	0.002807	10000	2.10088	0.030121	19.0989	0.273827
BI8626	4129	4140	TRSFYKHILGKS	11	1435.79	6.12415	0.003386	0	0	0	0	0
BI8626	4129	4140	TRSFYKHILGKS	11	1435.79	6.14152	0.008409	10	0.727609	0.01174	6.61463	0.106727
BI8626	4129	4140	TRSFYKHILGKS	11	1435.79	6.14924	0.010642	30	0.755268	0.022301	6.86607	0.202736
BI8626	4129	4140	TRSFYKHILGKS	11	1435.79	6.14594	0.006795	100	0.894028	0.031288	8.12753	0.284436
BI8626	4129	4140	TRSFYKHILGKS	11	1435.79	6.12781	0.004749	1000	1.49264	0.009036	13.5695	0.0821455
BI8626	4129	4140	TRSFYKHILGKS	11	1435.79	6.14408	0.001893	10000	2.09293	0.03404	19.0266	0.309455
Apo	4129	4140	TRSFYKHILGKS	11	1435.79	6.11837	0.001154	0	0	0	0	0
Apo	4129	4140	TRSFYKHILGKS	11	1435.79	6.13936	0.008683	10	0.747913	0.02326	6.79921	0.211455
Apo	4129	4140	TRSFYKHILGKS	11	1435.79	6.14785	0.005094	30	0.756726	0.027077	6.87933	0.246155
Apo	4129	4140	TRSFYKHILGKS	11	1435.79	6.14408	0.007123	100	0.902582	0.045338	8.20529	0.412164
Apo	4129	4140	TRSFYKHILGKS	11	1435.79	6.1388	0.000651	1000	1.53074	0.037138	13.9158	0.337618
Apo	4129	4140	TRSFYKHILGKS	11	1435.79	6.12807	0.009973	10000	2.09095	0.024306	19.0086	0.220964
BI8622	4129	4146	TRSFYKHILGKSVRYTDM	17	2201.14	6.7115	0.003824	0	0	0	0	0
BI8622	4129	4146	TRSFYKHILGKSVRYTDM	17	2201.14	6.79264	0.008886	10	3.07322	0.109755	18.0778	0.645618
BI8622	4129	4146	TRSFYKHILGKSVRYTDM	17	2201.14	6.77352	0.007928	30	3.34509	0.082627	19.677	0.486041
BI8622	4129	4146	TRSFYKHILGKSVRYTDM	17	2201.14	6.78547	0.010548	100	3.60826	0.028714	21.2251	0.168906
BI8622	4129	4146	TRSFYKHILGKSVRYTDM	17	2201.14	6.75065	0.00669	1000	4.83576	0.015017	28.4457	0.0883353
BI8622	4129	4146	TRSFYKHILGKSVRYTDM	17	2201.14	6.75493	0.001898	10000	5.3363	0.018866	31.39	0.110976
BI8626	4129	4146	TRSFYKHILGKSVRYTDM	17	2201.14	6.71212	0.001554	0	0	0	0	0
BI8626	4129	4146	TRSFYKHILGKSVRYTDM	17	2201.14	6.79718	0.010127	10	3.07436	0.199412	18.0845	1.17301
BI8626	4129	4146	TRSFYKHILGKSVRYTDM	17	2201.14	6.78966	0.020468	30	3.36909	0.209842	19.8182	1.23436
BI8626	4129	4146	TRSFYKHILGKSVRYTDM	17	2201.14	6.81137	0.02234	100	3.55219	0.162719	20.8952	0.957171
BI8626	4129	4146	TRSFYKHILGKSVRYTDM	17	2201.14	6.74619	0.003228	1000	4.82617	0.016065	28.3892	0.0945
BI8626	4129	4146	TRSFYKHILGKSVRYTDM	17	2201.14	6.76434	0.008368	10000	5.3395	0.028403	31.4088	0.167076
Apo	4129	4146	TRSFYKHILGKSVRYTDM	17	2201.14	6.71197	0.002668	0	0	0	0	0
Apo	4129	4146	TRSFYKHILGKSVRYTDM	17	2201.14	6.81135	0.011458	10	3.04553	0.060514	17.9149	0.355965
Apo	4129	4146	TRSFYKHILGKSVRYTDM	17	2201.14	6.80948	0.028951	30	3.25092	0.140842	19.1231	0.828482
Apo	4129	4146	TRSFYKHILGKSVRYTDM	17	2201.14	6.79416	0.012426	100	3.64484	0.051983	21.4402	0.305782
Apo	4129	4146	TRSFYKHILGKSVRYTDM	17	2201.14	6.76279	0.008892	1000	4.79312	0.033677	28.1948	0.1981
Apo	4129	4146	TRSFYKHILGKSVRYTDM	17	2201.14	6.74361	0.007335	10000	5.31424	0.019455	31.2602	0.114441
BI8622	4131	4135	SFYKH	4	680.328	5.39288	0.003065	0	0	0	0	0
BI8622	4131	4135	SFYKH	4	680.328	5.38277	0.003518	10	0.043555	0.017518	1.08888	0.43795
BI8622	4131	4135	SFYKH	4	680.328	5.3859	0.003578	30	0.050075	0.012678	1.25188	0.31695
BI8622	4131	4135	SFYKH	4	680.328	5.3682	0.013251	100	0.044643	0.014097	1.11608	0.352425
BI8622	4131	4135	SFYKH	4	680.328	5.38932	0.010104	1000	0.060883	0.019919	1.52208	0.497975
BI8622	4131	4135	SFYKH	4	680.328	5.38202	0.001981	10000	0.287487	0.014994	7.18717	0.37485
BI8626	4131	4135	SFYKH	4	680.328	5.39695	0.009602	0	0	0	0	0
BI8626	4131	4135	SFYKH	4	680.328	5.38709	0.004505	10	0.066446	0.008864	1.66115	0.2216
BI8626	4131	4135	SFYKH	4	680.328	5.3948	0.001077	30	0.03484	0.013115	0.871	0.327875
BI8626	4131	4135	SFYKH	4	680.328	5.38324	0.007515	100	0.075189	0.013223	1.87973	0.330575
BI8626	4131	4135	SFYKH	4	680.328	5.39412	0.002253	1000	0.083853	0.011203	2.09632	0.280075
BI8626	4131	4135	SFYKH	4	680.328	5.3688	0.006412	10000	0.307191	0.009865	7.67977	0.246625
Apo	4131	4135	SFYKH	4	680.328	5.39484	0.002101	0	0	0	0	0
Apo	4131	4135	SFYKH	4	680.328	5.40946	0.021181	10	0.039658	0.015105	0.99145	0.377625
Apo	4131	4135	SFYKH	4	680.328	5.38415	0.006381	30	0.018259	0.010187	0.456475	0.254675
Apo	4131	4135	SFYKH	4	680.328	5.38468	0.007398	100	0.033503	0.017513	0.837575	0.437825
Apo	4131	4135	SFYKH	4	680.328	5.3884	0.004756	1000	0.051351	0.010115	1.28378	0.252875
Apo	4131	4135	SFYKH	4	680.328	5.36175	0.008005	10000	0.289778	0.015004	7.24445	0.3751
BI8622	4132	4146	FYKHILGKSVRYTDM	14	1856.96	6.65073	0.002943	0	0	0	0	0
[truncated: 2,915 more rows]

## Sheet: Exp2_HDX_Residues
Apo	Deuterium uptake (%)						BI8622	Deuterium uptake (%)						BI8626	Deuterium uptake (%)						BI8622 versus Apo	Difference in deuterium uptake (%)							BI8626 versus Apo	Difference in deuterium uptake (%)
	HDX time (s)							HDX time (s)							HDX time (s)							HDX time (s)					Maximal diff.			HDX time (s)					Maximal diff.
Residue	10	30	100	1000	10000	Maximal	Residue	10	30	100	1000	10000	Maximal	Residue	10	30	100	1000	10000	Maximal	Residue	10	30	100	1000	10000	Lowest	Highest	Residue	10	30	100	1000	10000	Lowest	Highest
3991							3991							3991							3991								3991
3992	36.1	39.1	43.3	49.5	52	52	3992	37.9	40.1	43	51.2	50.3	51.2	3992	35.9	40.1	42.3	51	51.3	51.3	3992	1.8	1	-0.3	1.7	-1.7	-1.7	1.8	3992	-0.2	1	-1	1.5	-0.7	-1	1.5
3993	36.1	39.1	43.3	49.5	52	52	3993	37.9	40.1	43	51.2	50.3	51.2	3993	35.9	40.1	42.3	51	51.3	51.3	3993	1.8	1	-0.3	1.7	-1.7	-1.7	1.8	3993	-0.2	1	-1	1.5	-0.7	-1	1.5
3994	36.1	39.1	43.3	49.5	52	52	3994	37.9	40.1	43	51.2	50.3	51.2	3994	35.9	40.1	42.3	51	51.3	51.3	3994	1.8	1	-0.3	1.7	-1.7	-1.7	1.8	3994	-0.2	1	-1	1.5	-0.7	-1	1.5
3995	18.6	22.3	29.3	40.9	49.2	49.2	3995	20.2	23.7	31.1	41.9	50.5	50.5	3995	19.4	23.5	30	42.1	50.8	50.8	3995	1.6	1.4	1.8	1	1.3	1	1.8	3995	0.8	1.2	0.7	1.2	1.6	0.7	1.6
3996	18.6	22.3	29.3	40.9	49.2	49.2	3996	20.2	23.7	31.1	41.9	50.5	50.5	3996	19.4	23.5	30	42.1	50.8	50.8	3996	1.6	1.4	1.8	1	1.3	1	1.8	3996	0.8	1.2	0.7	1.2	1.6	0.7	1.6
3997	18.6	22.3	29.3	40.9	49.2	49.2	3997	20.2	23.7	31.1	41.9	50.5	50.5	3997	19.4	23.5	30	42.1	50.8	50.8	3997	1.6	1.4	1.8	1	1.3	1	1.8	3997	0.8	1.2	0.7	1.2	1.6	0.7	1.6
3998	18.6	22.3	29.3	40.9	49.2	49.2	3998	20.2	23.7	31.1	41.9	50.5	50.5	3998	19.4	23.5	30	42.1	50.8	50.8	3998	1.6	1.4	1.8	1	1.3	1	1.8	3998	0.8	1.2	0.7	1.2	1.6	0.7	1.6
3999	10.5	12.6	17.8	31.3	42.1	42.1	3999	10.6	13.1	18	31.7	41.4	41.4	3999	10.5	12.7	18.1	32.4	41.6	41.6	3999	0.1	0.5	0.2	0.4	-0.7	-0.7	0.5	3999	0	0.1	0.3	1.1	-0.5	-0.5	1.1
4000	10.7	12.5	18.3	35.5	48.3	48.3	4000	10.9	13	18.3	35.6	48	48	4000	10.3	12.8	18.2	35.7	47.8	47.8	4000	0.2	0.5	0	0.1	-0.3	-0.3	0.5	4000	-0.4	0.3	-0.1	0.2	-0.5	-0.5	0.3
4001	6.4	8.3	11.7	25.7	35.1	35.1	4001	6.6	8.3	12	24.6	35	35	4001	6.5	7.6	11.9	24.8	35.4	35.4	4001	0.2	0	0.3	-1.1	-0.1	-1.1	0.3	4001	0.1	-0.7	0.2	-0.9	0.3	-0.9	0.3
4002	3.2	2.2	3	4.2	14.4	14.4	4002	2.5	2.8	2.8	4	14.6	14.6	4002	3.1	2.6	2.9	4	14.5	14.5	4002	-0.7	0.6	-0.2	-0.2	0.2	-0.7	0.6	4002	-0.1	0.4	-0.1	-0.2	0.1	-0.2	0.4
4003	3.2	2.2	3	4.2	14.4	14.4	4003	2.5	2.8	2.8	4	14.6	14.6	4003	3.1	2.6	2.9	4	14.5	14.5	4003	-0.7	0.6	-0.2	-0.2	0.2	-0.7	0.6	4003	-0.1	0.4	-0.1	-0.2	0.1	-0.2	0.4
[truncated: 371 more rows]
